# Supplementary material for: High-throughput plasma/serum proteomics by coupling nanoparticle protein corona-based sample preparation and capillary zone electrophoresis-tandem mass spectrometry
Source: Anal Methods. 2025 Jul 18;17(31):6356–65. doi: 10.1039/d5ay00721f (PMC12305297; doi:10.1039/d5ay00721f)
Supplement: AY-017-D5AY00721F-s001 [file AY-017-D5AY00721F-s001.xlsx]

## Sheet: Note
The lists of identified human plasma proteins by CZE-MS/MS under different nanoparticle protein corona-based sample preparation.
The triplicate runs of each sample are combined for joint database searching.
A 1% peptide-level FDR was used to filter the identified proteins after database search using Proteome Discoverer 2.2 with SEQUEST HT search engine against the UniProt proteome database of human (UP000005640, 82697 entries, version 12/2023).
All proteins shown in the table are from human plasma proteins.

## Sheet: Human plasma
Protein FDR Confidence: Combined	Accession	Description	Exp. q-value: Combined	Sum PEP Score	Coverage [%]	# Peptides	# PSMs	# Unique Peptides	# Protein Groups	# AAs	MW [kDa]	Score Sequest HT: Sequest HT	# Peptides (by Search Engine): Sequest HT
High	P02768	Albumin OS=Homo sapiens OX=9606 GN=ALB PE=1 SV=2	0	827.764	93	114	1763	114	1	609	69.3	3298.06	114
High	P01024	Complement C3 OS=Homo sapiens OX=9606 GN=C3 PE=1 SV=2	0	706.166	75	131	857	131	1	1663	187	2092.84	131
High	P04114	Apolipoprotein B-100 OS=Homo sapiens OX=9606 GN=APOB PE=1 SV=2	0	495.174	36	125	512	125	1	4563	515.3	864.34	125
High	P02787	Serotransferrin OS=Homo sapiens OX=9606 GN=TF PE=1 SV=4	0	455.519	81	80	624	80	1	698	77	1359.94	80
High	P01023	Alpha-2-macroglobulin OS=Homo sapiens OX=9606 GN=A2M PE=1 SV=3	0	425.889	53	74	536	69	1	1474	163.2	1186.43	74
High	P02751	Fibronectin OS=Homo sapiens OX=9606 GN=FN1 PE=1 SV=5	0	411.297	43	78	451	78	1	2477	272.2	1008.67	78
High	P02675	Fibrinogen beta chain OS=Homo sapiens OX=9606 GN=FGB PE=1 SV=2	0	358.549	75	48	454	48	1	491	55.9	1062.98	48
High	P0C0L5	Complement C4-B OS=Homo sapiens OX=9606 GN=C4B PE=1 SV=2	0	346.005	52	67	321	2	1	1744	192.6	668.27	67
High	P0C0L4	Complement C4-A OS=Homo sapiens OX=9606 GN=C4A PE=1 SV=2	0	339.864	51	67	317	2	1	1744	192.7	661.17	67
High	P02671	Fibrinogen alpha chain OS=Homo sapiens OX=9606 GN=FGA PE=1 SV=2	0	338.73	48	60	477	60	1	866	94.9	1071	60
High	P02647	Apolipoprotein A-I OS=Homo sapiens OX=9606 GN=APOA1 PE=1 SV=1	0	286.007	81	51	438	51	1	267	30.8	1079.78	51
High	P00450	Ceruloplasmin OS=Homo sapiens OX=9606 GN=CP PE=1 SV=1	0	243.932	58	49	272	3	1	1065	122.1	667.21	49
High	E9PFZ2	Ceruloplasmin OS=Homo sapiens OX=9606 GN=CP PE=1 SV=1	0	230.278	59	47	252	1	1	946	108.8	601.43	47
High	P01857	Immunoglobulin heavy constant gamma 1 OS=Homo sapiens OX=9606 GN=IGHG1 PE=1 SV=2	0	230.245	60	29	305	16	1	399	43.9	781.88	29
High	P01009	Alpha-1-antitrypsin OS=Homo sapiens OX=9606 GN=SERPINA1 PE=1 SV=3	0	223.405	71	44	301	2	1	418	46.7	681.23	44
High	A0A024R6N5	Alpha-1-antitrypsin OS=Homo sapiens OX=9606 GN=SERPINA1 PE=1 SV=1	0	216.144	71	44	291	2	1	418	46.7	651.36	44
High	P00738	Haptoglobin OS=Homo sapiens OX=9606 GN=HP PE=1 SV=1	0	205.053	64	35	337	20	1	406	45.2	770.27	35
High	P01834	Immunoglobulin kappa constant OS=Homo sapiens OX=9606 GN=IGKC PE=1 SV=2	0	194.406	93	20	338	20	1	107	11.8	1133.84	20
High	A0A8Q3SIA1	Sushi domain-containing protein OS=Homo sapiens OX=9606 PE=4 SV=1	0	187.933	35	45	176	45	1	1504	169.8	303.58	45
High	P01042	Kininogen-1 OS=Homo sapiens OX=9606 GN=KNG1 PE=1 SV=2	0	185.51	47	39	162	39	1	644	71.9	319.62	39
High	P06727	Apolipoprotein A-IV OS=Homo sapiens OX=9606 GN=APOA4 PE=1 SV=4	0	180.852	76	41	170	41	1	396	45.3	309.27	41
High	P02679	Fibrinogen gamma chain OS=Homo sapiens OX=9606 GN=FGG PE=1 SV=3	0	167.072	55	32	210	32	1	453	51.5	457.41	32
High	P01859	Immunoglobulin heavy constant gamma 2 OS=Homo sapiens OX=9606 GN=IGHG2 PE=1 SV=3	0	161.894	52	23	218	11	1	395	43.8	619.23	23
High	B7ZKJ8	ITIH4 protein OS=Homo sapiens OX=9606 GN=ITIH4 PE=1 SV=1	0	159.615	43	36	137	13	1	935	103.8	261.89	36
High	P01871	Immunoglobulin heavy constant mu OS=Homo sapiens OX=9606 GN=IGHM PE=1 SV=5	0	156.714	55	29	220	29	1	474	51.9	453.78	29
High	B4E1Z4	Complement C2 OS=Homo sapiens OX=9606 PE=1 SV=1	0	156.018	32	38	155	35	1	1266	140.9	313.06	38
High	P04217	Alpha-1B-glycoprotein OS=Homo sapiens OX=9606 GN=A1BG PE=1 SV=4	0	153.175	60	21	164	21	1	495	54.2	358.98	21
High	P02765	Alpha-2-HS-glycoprotein OS=Homo sapiens OX=9606 GN=AHSG PE=1 SV=2	0	147.349	52	17	159	17	1	367	39.3	484.6	17
High	P19823	Inter-alpha-trypsin inhibitor heavy chain H2 OS=Homo sapiens OX=9606 GN=ITIH2 PE=1 SV=2	0	147.206	37	32	141	32	1	946	106.4	291.23	32
High	P0DOY3	Immunoglobulin lambda constant 3 OS=Homo sapiens OX=9606 GN=IGLC3 PE=1 SV=1	0	132.613	96	16	210	10	1	106	11.3	546.35	16
High	P19827	Inter-alpha-trypsin inhibitor heavy chain H1 OS=Homo sapiens OX=9606 GN=ITIH1 PE=1 SV=3	0	132.079	33	21	135	21	1	911	101.3	290.49	21
High	A0A9H4DHQ2	Immunoglobulin heavy constant gamma 3 (G3m marker) (Fragment) OS=Homo sapiens OX=9606 GN=IGHG3 PE=1 SV=1	0	129.309	45	22	169	8	1	446	49.1	367.38	22
High	P01861	Immunoglobulin heavy constant gamma 4 OS=Homo sapiens OX=9606 GN=IGHG4 PE=1 SV=2	0	123.422	54	19	143	11	1	396	43.8	363.09	19
High	H7C0L5	Inter-alpha-trypsin inhibitor heavy chain 4 (Fragment) OS=Homo sapiens OX=9606 GN=ITIH4 PE=1 SV=1	0	115.516	42	25	109	2	1	719	80	212.2	25
High	P01876	Immunoglobulin heavy constant alpha 1 OS=Homo sapiens OX=9606 GN=IGHA1 PE=1 SV=3	0	112.289	51	20	218	12	1	398	42.8	574.08	20
High	P01008	Antithrombin-III OS=Homo sapiens OX=9606 GN=SERPINC1 PE=1 SV=1	0	99.637	58	24	90	24	1	464	52.6	173.04	24
High	P00734	Prothrombin OS=Homo sapiens OX=9606 GN=F2 PE=1 SV=2	0	97.156	40	21	110	21	1	622	70	237.98	21
High	A0A0B4J231	Immunoglobulin lambda like polypeptide 5 OS=Homo sapiens OX=9606 GN=IGLL5 PE=1 SV=1	0	91.701	51	14	120	9	1	215	23.1	308.48	14
High	D6RF35	Vitamin D-binding protein OS=Homo sapiens OX=9606 GN=GC PE=1 SV=1	0	90.837	46	22	107	22	1	476	53	255.36	22
High	P01011	Alpha-1-antichymotrypsin OS=Homo sapiens OX=9606 GN=SERPINA3 PE=1 SV=2	0	87.945	35	16	88	16	1	423	47.6	176.6	16
High	P06396	Gelsolin OS=Homo sapiens OX=9606 GN=GSN PE=1 SV=1	0	86.712	41	19	79	19	1	782	85.6	157.73	19
High	A6PVI2	Plasminogen OS=Homo sapiens OX=9606 GN=PLG PE=1 SV=2	0	83.63	38	23	100	23	1	827	92.4	172.39	23
High	P02790	Hemopexin OS=Homo sapiens OX=9606 GN=HPX PE=1 SV=2	0	82.23	50	22	112	22	1	462	51.6	227.81	22
High	P00739	Haptoglobin-related protein OS=Homo sapiens OX=9606 GN=HPR PE=2 SV=2	0	80.02	39	18	138	3	1	348	39	251.47	18
High	P02763	Alpha-1-acid glycoprotein 1 OS=Homo sapiens OX=9606 GN=ORM1 PE=1 SV=2	0	79.933	50	15	100	9	1	201	23.5	210.1	15
High	P43652	Afamin OS=Homo sapiens OX=9606 GN=AFM PE=1 SV=1	0	78.41	41	23	67	23	1	599	69	99.95	23
High	P25311	Zinc-alpha-2-glycoprotein OS=Homo sapiens OX=9606 GN=AZGP1 PE=1 SV=2	0	77.508	59	20	90	20	1	298	34.2	158.12	20
High	P10909	Clusterin OS=Homo sapiens OX=9606 GN=CLU PE=1 SV=1	0	75.119	37	21	120	21	1	449	52.5	266.06	21
High	P04196	Histidine-rich glycoprotein OS=Homo sapiens OX=9606 GN=HRG PE=1 SV=1	0	71.469	33	16	97	16	1	525	59.5	207.57	16
High	P02649	Apolipoprotein E OS=Homo sapiens OX=9606 GN=APOE PE=1 SV=1	0	69.226	64	19	83	19	1	317	36.1	148.89	19
High	Q96PD5	N-acetylmuramoyl-L-alanine amidase OS=Homo sapiens OX=9606 GN=PGLYRP2 PE=1 SV=1	0	59.641	32	11	58	11	1	576	62.2	110.11	11
High	V9GYM3	Apolipoprotein A-II OS=Homo sapiens OX=9606 GN=APOA2 PE=1 SV=1	0	57.521	56	11	135	11	1	133	14.9	338.45	11
High	P04004	Vitronectin OS=Homo sapiens OX=9606 GN=VTN PE=1 SV=1	0	57.22	26	14	106	14	1	478	54.3	246.16	14
High	P02750	Leucine-rich alpha-2-glycoprotein OS=Homo sapiens OX=9606 GN=LRG1 PE=1 SV=2	0	55.895	52	13	56	13	1	347	38.2	115.17	13
High	P68871	Hemoglobin subunit beta OS=Homo sapiens OX=9606 GN=HBB PE=1 SV=2	0	55.57	55	7	54	7	1	147	16	136.17	7
High	P02766	Transthyretin OS=Homo sapiens OX=9606 GN=TTR PE=1 SV=1	0	54.764	73	10	39	10	1	147	15.9	85.32	10
High	P02749	Beta-2-glycoprotein 1 OS=Homo sapiens OX=9606 GN=APOH PE=1 SV=3	0	51.148	52	11	50	11	1	345	38.3	106.18	11
High	P04003	C4b-binding protein alpha chain OS=Homo sapiens OX=9606 GN=C4BPA PE=1 SV=2	0	47.453	22	14	63	14	1	597	67	125.95	14
High	A0A5H1ZRQ7	Immunoglobulin lambda constant 7 (Fragment) OS=Homo sapiens OX=9606 GN=IGLC7 PE=1 SV=1	0	43.389	46	4	65	1	1	106	11.3	181.88	4
High	P01877	Immunoglobulin heavy constant alpha 2 OS=Homo sapiens OX=9606 GN=IGHA2 PE=1 SV=5	0	40.722	36	11	92	3	1	391	42.3	223.89	11
High	P19652	Alpha-1-acid glycoprotein 2 OS=Homo sapiens OX=9606 GN=ORM2 PE=1 SV=2	0	40.604	40	11	50	5	1	201	23.6	89.03	11
High	B0YIW2	Apolipoprotein C-III OS=Homo sapiens OX=9606 GN=APOC3 PE=1 SV=1	0	39.403	37	6	49	6	1	117	12.8	161.79	6
High	P27169	Serum paraoxonase/arylesterase 1 OS=Homo sapiens OX=9606 GN=PON1 PE=1 SV=3	0	39.239	42	10	54	10	1	355	39.7	94.58	10
High	A0A096LPE2	SAA2-SAA4 readthrough OS=Homo sapiens OX=9606 GN=SAA2-SAA4 PE=3 SV=1	0	38.549	48	10	45	8	1	208	23.3	84.99	10
High	E9PGN7	Serpin family G member 1 OS=Homo sapiens OX=9606 GN=SERPING1 PE=1 SV=1	0	37.619	19	11	45	11	1	543	59.5	91.1	11
High	P02748	Complement component C9 OS=Homo sapiens OX=9606 GN=C9 PE=1 SV=2	0	35.853	23	12	47	12	1	559	63.1	68.4	12
High	P08697	Alpha-2-antiplasmin OS=Homo sapiens OX=9606 GN=SERPINF2 PE=1 SV=3	0	35.525	30	8	52	8	1	491	54.5	120.54	8
High	P01019	Angiotensinogen OS=Homo sapiens OX=9606 GN=AGT PE=1 SV=3	0	34.876	22	7	35	7	1	485	53.1	91.6	7
High	P07357	Complement component C8 alpha chain OS=Homo sapiens OX=9606 GN=C8A PE=1 SV=2	0	34.789	18	9	30	9	1	584	65.1	60.7	9
High	P20742	Pregnancy zone protein OS=Homo sapiens OX=9606 GN=PZP PE=1 SV=4	0	33.699	6	6	36	1	1	1482	163.8	61.8	6
High	P02753	Retinol-binding protein 4 OS=Homo sapiens OX=9606 GN=RBP4 PE=1 SV=3	0	33.383	63	8	42	8	1	201	23	92.15	8
High	B4DPQ0	Complement C1r OS=Homo sapiens OX=9606 GN=C1R PE=1 SV=1	0	32.576	15	8	22	6	1	719	81.8	31.32	8
High	A0A8Q3SID6	Complement C5 OS=Homo sapiens OX=9606 GN=C5 PE=4 SV=1	0	30.948	7	9	34	9	1	1682	188.5	49.66	9
High	C9JF17	Apolipoprotein D (Fragment) OS=Homo sapiens OX=9606 GN=APOD PE=1 SV=1	0	30.487	35	8	30	8	1	215	24.1	54.96	8
High	P69905	Hemoglobin subunit alpha OS=Homo sapiens OX=9606 GN=HBA1 PE=1 SV=2	0	30.334	51	5	41	5	1	142	15.2	75.1	5
High	P0DJI8	Serum amyloid A-1 protein OS=Homo sapiens OX=9606 GN=SAA1 PE=1 SV=1	0	27.966	66	5	33	3	1	122	13.5	89.58	5
High	P36955	Pigment epithelium-derived factor OS=Homo sapiens OX=9606 GN=SERPINF1 PE=1 SV=4	0	27.708	21	7	29	7	1	418	46.3	36.78	7
High	P02760	Protein AMBP OS=Homo sapiens OX=9606 GN=AMBP PE=1 SV=1	0	24.717	30	6	37	6	1	352	39	70.93	6
High	A0A994J439	Inter-alpha-trypsin inhibitor heavy chain 3 OS=Homo sapiens OX=9606 GN=ITIH3 PE=1 SV=1	0	23.995	11	8	24	8	1	927	103.7	34.74	8
High	A0A2R8Y3M9	Complement factor I OS=Homo sapiens OX=9606 PE=4 SV=1	0	23.122	13	7	24	7	1	631	71.3	18.82	7
High	P09871	Complement C1s subcomponent OS=Homo sapiens OX=9606 GN=C1S PE=1 SV=1	0	22.98	13	6	25	6	1	688	76.6	47.67	6
High	P00748	Coagulation factor XII OS=Homo sapiens OX=9606 GN=F12 PE=1 SV=3	0	21.987	14	8	21	8	1	615	67.7	36.77	8
High	B1AH94	Apolipoprotein L1 OS=Homo sapiens OX=9606 GN=APOL1 PE=1 SV=2	0	20.612	11	4	12	4	1	427	47.4	22.24	4
High	P0DJI9	Serum amyloid A-2 protein OS=Homo sapiens OX=9606 GN=SAA2 PE=1 SV=1	0	20.545	49	4	20	2	1	122	13.5	44.69	4
High	A0A4W8ZXM2	Immunoglobulin heavy variable 3-72 OS=Homo sapiens OX=9606 GN=IGHV3-72 PE=4 SV=1	0	20.442	50	3	27	3	1	101	11.2	62.81	3
High	P02743	Serum amyloid P-component OS=Homo sapiens OX=9606 GN=APCS PE=1 SV=2	0	19.438	26	5	26	5	1	223	25.4	52.06	5
High	P07358	Complement component C8 beta chain OS=Homo sapiens OX=9606 GN=C8B PE=1 SV=4	0	19.337	16	5	20	5	1	591	66.9	35.13	5
High	O43866	CD5 antigen-like OS=Homo sapiens OX=9606 GN=CD5L PE=1 SV=1	0	17.989	19	5	17	5	1	347	38.1	32.27	5
High	P13671	Complement component C6 OS=Homo sapiens OX=9606 GN=C6 PE=1 SV=3	0	17.614	9	7	17	7	1	934	104.7	26.39	7
High	P04275	von Willebrand factor OS=Homo sapiens OX=9606 GN=VWF PE=1 SV=4	0	16.422	3	6	13	6	1	2813	309.1	16.56	6
High	H0YAC1	Uncharacterized protein (Fragment) OS=Homo sapiens OX=9606 PE=3 SV=1	0	15.05	11	7	16	7	1	686	76.8	12.29	7
High	P51884	Lumican OS=Homo sapiens OX=9606 GN=LUM PE=1 SV=2	0	14.493	18	4	12	4	1	338	38.4	18.8	4
High	P60709	Actin, cytoplasmic 1 OS=Homo sapiens OX=9606 GN=ACTB PE=1 SV=1	0	14.37	18	4	13	2	1	375	41.7	28.06	4
High	P10643	Complement component C7 OS=Homo sapiens OX=9606 GN=C7 PE=1 SV=2	0	13.769	9	6	12	6	1	843	93.5	13.92	6
High	P06681	Complement C2 OS=Homo sapiens OX=9606 GN=C2 PE=1 SV=2	0	13.661	6	4	8	1	1	752	83.2	16.07	4
High	P01591	Immunoglobulin J chain OS=Homo sapiens OX=9606 GN=JCHAIN PE=1 SV=4	0	12.907	28	4	19	4	1	159	18.1	27.97	4
High	P62736	Actin, aortic smooth muscle OS=Homo sapiens OX=9606 GN=ACTA2 PE=1 SV=1	0	12.783	12	3	10	1	1	377	42	26.68	3
High	P01619	Immunoglobulin kappa variable 3-20 OS=Homo sapiens OX=9606 GN=IGKV3-20 PE=1 SV=2	0	12.217	47	4	24	3	1	116	12.5	29.81	4
High	P05546	Heparin cofactor 2 OS=Homo sapiens OX=9606 GN=SERPIND1 PE=1 SV=3	0	11.454	10	5	24	5	1	499	57	35.51	5
High	A0A087WW87	Immunoglobulin kappa variable 2-40 OS=Homo sapiens OX=9606 GN=IGKV2-40 PE=3 SV=2	0	11.133	17	2	4	1	1	121	13.3	10.92	2
High	Q9NZP8	Complement C1r subcomponent-like protein OS=Homo sapiens OX=9606 GN=C1RL PE=1 SV=2	0	10.809	18	5	6	3	1	487	53.5	2.16	5
High	P01624	Immunoglobulin kappa variable 3-15 OS=Homo sapiens OX=9606 GN=IGKV3-15 PE=1 SV=2	0	10.666	32	3	19	1	1	115	12.5	36.91	3
High	P22792	Carboxypeptidase N subunit 2 OS=Homo sapiens OX=9606 GN=CPN2 PE=1 SV=3	0	10.561	14	5	12	5	1	545	60.5	6.49	5
High	P35858	Insulin-like growth factor-binding protein complex acid labile subunit OS=Homo sapiens OX=9606 GN=IGFALS PE=1 SV=1	0	10.522	10	4	10	4	1	605	66	12.51	4
High	P08185	Corticosteroid-binding globulin OS=Homo sapiens OX=9606 GN=SERPINA6 PE=1 SV=1	0	10.508	8	3	9	3	1	405	45.1	9.54	3
High	P06310	Immunoglobulin kappa variable 2-30 OS=Homo sapiens OX=9606 GN=IGKV2-30 PE=3 SV=2	0	9.987	38	3	8	2	1	120	13.2	9.95	3
High	P01593	Immunoglobulin kappa variable 1D-33 OS=Homo sapiens OX=9606 GN=IGKV1D-33 PE=1 SV=2	0	9.834	14	1	15	1	1	117	12.8	37.24	1
High	P01703	Immunoglobulin lambda variable 1-40 OS=Homo sapiens OX=9606 GN=IGLV1-40 PE=1 SV=2	0	9.312	43	2	7	2	1	118	12.3	4.12	2
High	P07360	Complement component C8 gamma chain OS=Homo sapiens OX=9606 GN=C8G PE=1 SV=3	0	9.127	27	3	7	3	1	202	22.3	2.82	3
High	Q16610	Extracellular matrix protein 1 OS=Homo sapiens OX=9606 GN=ECM1 PE=1 SV=2	0	8.952	15	5	9	5	1	540	60.6	6.83	5
High	A0A075B6H7	Probable non-functional immunoglobulin kappa variable 3-7 OS=Homo sapiens OX=9606 GN=IGKV3-7 PE=1 SV=1	0	8.793	23	2	23	1	1	116	12.8	42.54	2
High	A0A0C4DH72	Immunoglobulin kappa variable 1-6 OS=Homo sapiens OX=9606 GN=IGKV1-6 PE=3 SV=1	0	8.382	26	2	14	1	1	117	12.7	29.47	2
High	K7ER74	Apolipoprotein C-II OS=Homo sapiens OX=9606 GN=APOC4-APOC2 PE=1 SV=1	0	8.314	11	3	10	3	1	178	20	17.32	3
High	O75636	Ficolin-3 OS=Homo sapiens OX=9606 GN=FCN3 PE=1 SV=2	0	8.171	13	3	4	3	1	299	32.9	5.06	3
High	P02747	Complement C1q subcomponent subunit C OS=Homo sapiens OX=9606 GN=C1QC PE=1 SV=3	0	8.031	9	2	9	2	1	245	25.8	23.35	2
High	O95445	Apolipoprotein M OS=Homo sapiens OX=9606 GN=APOM PE=1 SV=2	0	8.013	7	2	5	2	1	188	21.2	9.9	2
High	A0A0J9YY99	Ig-like domain-containing protein (Fragment) OS=Homo sapiens OX=9606 PE=1 SV=1	0	7.922	22	3	8	2	1	117	13	12.62	3
High	A0A0C4DH25	Immunoglobulin kappa variable 3D-20 OS=Homo sapiens OX=9606 GN=IGKV3D-20 PE=3 SV=1	0	7.847	28	2	13	1	1	116	12.5	20.08	2
High	P01700	Immunoglobulin lambda variable 1-47 OS=Homo sapiens OX=9606 GN=IGLV1-47 PE=1 SV=2	0	7.798	29	2	8	2	1	117	12.3	12.42	2
High	A0A0B4J1X5	Immunoglobulin heavy variable 3-74 OS=Homo sapiens OX=9606 GN=IGHV3-74 PE=3 SV=1	0	7.79	26	3	11	1	1	117	12.8	19.4	3
High	A0A0A0MS09	Immunoglobulin heavy constant delta (Fragment) OS=Homo sapiens OX=9606 GN=IGHD PE=1 SV=1	0	7.72	4	1	2	1	1	430	47.5	3.12	1
High	Q03591	Complement factor H-related protein 1 OS=Homo sapiens OX=9606 GN=CFHR1 PE=1 SV=2	0	7.606	10	2	5	1	1	330	37.6	5.07	2
High	A0A0S2Z4L3	Protein S (Fragment) OS=Homo sapiens OX=9606 GN=PROS1 PE=1 SV=1	0	7.183	8	5	8	5	1	708	78.8	2.48	5
High	P02745	Complement C1q subcomponent subunit A OS=Homo sapiens OX=9606 GN=C1QA PE=1 SV=2	0	6.88	9	1	8	1	1	245	26	29.35	1
High	P01782	Immunoglobulin heavy variable 3-9 OS=Homo sapiens OX=9606 GN=IGHV3-9 PE=1 SV=2	0	6.414	33	3	18	2	1	118	12.9	16.47	3
High	A0A0B4J2D9	Immunoglobulin kappa variable 1D-13 OS=Homo sapiens OX=9606 GN=IGKV1D-13 PE=3 SV=1	0	6.025	14	1	5	1	1	117	12.6	9.2	1
High	P05452	Tetranectin OS=Homo sapiens OX=9606 GN=CLEC3B PE=1 SV=3	0	5.79	25	2	4	2	1	202	22.5	4.47	2
High	P20851	C4b-binding protein beta chain OS=Homo sapiens OX=9606 GN=C4BPB PE=1 SV=1	0	5.783	11	2	4	2	1	252	28.3	2.19	2
High	A0A0A0MRZ8	Immunoglobulin kappa variable 3D-11 OS=Homo sapiens OX=9606 GN=IGKV3D-11 PE=3 SV=6	0	5.537	32	3	13	2	1	115	12.6	23.62	3
High	A0A075B6S5	Immunoglobulin kappa variable 1-27 OS=Homo sapiens OX=9606 GN=IGKV1-27 PE=3 SV=1	0	4.997	14	1	6	1	1	117	12.7	4.54	1
High	D6RAR4	HGF activator OS=Homo sapiens OX=9606 GN=HGFAC PE=1 SV=1	0	4.87	3	2	3	2	1	662	71.4	3.78	2
High	P01599	Immunoglobulin kappa variable 1-17 OS=Homo sapiens OX=9606 GN=IGKV1-17 PE=1 SV=2	0	4.546	26	2	2	1	1	117	12.8	0	2
High	E7EQ64	Serine protease 1 OS=Homo sapiens OX=9606 GN=PRSS1 PE=1 SV=1	0	4.47	7	2	10	2	1	261	28.1	12.34	2
High	P18428	Lipopolysaccharide-binding protein OS=Homo sapiens OX=9606 GN=LBP PE=1 SV=3	0	4.393	4	2	4	2	1	481	53.4	5.77	2
High	P80108	Phosphatidylinositol-glycan-specific phospholipase D OS=Homo sapiens OX=9606 GN=GPLD1 PE=1 SV=3	0	4.39	3	2	4	2	1	840	92.3	0	2
High	A0A3B3IQ51	Complement factor H related 2 OS=Homo sapiens OX=9606 GN=CFHR2 PE=1 SV=1	0	4.369	6	2	2	1	1	355	39.4	0	2
High	A0A075B6K4	Immunoglobulin lambda variable 3-10 OS=Homo sapiens OX=9606 GN=IGLV3-10 PE=3 SV=2	0	4.346	28	2	5	2	1	115	12.4	5.62	2
High	A0A075B7D0	Immunoglobulin heavy variable 1/OR15-1 (non-functional) (Fragment) OS=Homo sapiens OX=9606 GN=IGHV1OR15-1 PE=1 SV=1	0	4.228	16	2	10	1	1	117	13	17.03	2
High	Q14520	Hyaluronan-binding protein 2 OS=Homo sapiens OX=9606 GN=HABP2 PE=1 SV=1	0	4.185	2	1	2	1	1	560	62.6	3.12	1
High	P06312	Immunoglobulin kappa variable 4-1 OS=Homo sapiens OX=9606 GN=IGKV4-1 PE=1 SV=1	0	4.131	17	2	8	2	1	121	13.4	3.4	2
High	Q08380	Galectin-3-binding protein OS=Homo sapiens OX=9606 GN=LGALS3BP PE=1 SV=1	0	4.021	3	2	5	2	1	585	65.3	1.65	2
High	B1AHL2	Fibulin-1 OS=Homo sapiens OX=9606 GN=FBLN1 PE=1 SV=1	0	4.004	2	2	6	2	1	721	78.3	0	2
High	P04264	Keratin, type II cytoskeletal 1 OS=Homo sapiens OX=9606 GN=KRT1 PE=1 SV=6	0	3.724	4	2	2	2	1	644	66	0	2
High	A0A0C4DH29	Immunoglobulin heavy variable 1-3 OS=Homo sapiens OX=9606 GN=IGHV1-3 PE=3 SV=1	0	3.557	15	2	6	1	1	117	13	10.85	2
High	A0A075B6I0	Immunoglobulin lambda variable 8-61 OS=Homo sapiens OX=9606 GN=IGLV8-61 PE=3 SV=7	0	3.517	13	1	3	1	1	122	12.8	2.15	1
High	Q15485	Ficolin-2 OS=Homo sapiens OX=9606 GN=FCN2 PE=1 SV=2	0	2.957	4	1	1	1	1	313	34	2.47	1
High	P01602	Immunoglobulin kappa variable 1-5 OS=Homo sapiens OX=9606 GN=IGKV1-5 PE=1 SV=2	0	2.718	9	1	2	1	1	117	12.8	2.43	1
High	A0A8J8ZCA0	Lipoprotein(a) (Fragment) OS=Homo sapiens OX=9606 GN=LPA PE=1 SV=1	0	2.636	3	1	6	1	1	613	68.7	3.42	1
High	A0A8I5KW61	C-X-C motif chemokine OS=Homo sapiens OX=9606 PE=3 SV=1	0	2.494	5	1	3	1	1	193	21.1	5.85	1
High	A0A075B6I9	Immunoglobulin lambda variable 7-46 OS=Homo sapiens OX=9606 GN=IGLV7-46 PE=3 SV=4	0.008	2.286	8	1	5	1	1	117	12.5	5.39	1
Medium	P05543	Thyroxine-binding globulin OS=Homo sapiens OX=9606 GN=SERPINA7 PE=1 SV=2	0.012	2.136	3	1	4	1	1	415	46.3	1.79	1
Medium	K7EPF9	Apolipoprotein C1 OS=Homo sapiens OX=9606 GN=APOC1 PE=1 SV=1	0.012	2.065	7	1	3	1	1	129	14.3	7.29	1
Medium	P15814	Immunoglobulin lambda-like polypeptide 1 OS=Homo sapiens OX=9606 GN=IGLL1 PE=1 SV=1	0.011	2.046	7	1	1	1	1	213	22.9	0	1
Medium	P62906	Large ribosomal subunit protein uL1 OS=Homo sapiens OX=9606 GN=RPL10A PE=1 SV=2	0.011	1.934	9	1	2	1	1	217	24.8	5.38	1
Medium	P01034	Cystatin-C OS=Homo sapiens OX=9606 GN=CST3 PE=1 SV=1	0.011	1.931	12	1	2	1	1	146	15.8	0	1
Medium	A0A075B6J9	Immunoglobulin lambda variable 2-18 OS=Homo sapiens OX=9606 GN=IGLV2-18 PE=3 SV=2	0.011	1.913	11	1	1	1	1	118	12.4	0	1
Medium	A0A6I8PRU0	Cadherin EGF LAG seven-pass G-type receptor 1 OS=Homo sapiens OX=9606 GN=CELSR1 PE=1 SV=2	0.011	1.906	1	1	1	1	1	3019	329.7	2.17	1
Medium	P02741	C-reactive protein OS=Homo sapiens OX=9606 GN=CRP PE=1 SV=1	0.011	1.895	4	1	1	1	1	224	25	0	1
Medium	P05160	Coagulation factor XIII B chain OS=Homo sapiens OX=9606 GN=F13B PE=1 SV=3	0.011	1.866	2	1	1	1	1	661	75.5	0	1
Medium	P01706	Immunoglobulin lambda variable 2-11 OS=Homo sapiens OX=9606 GN=IGLV2-11 PE=1 SV=2	0.031	1.797	18	1	2	1	1	119	12.6	0	1
Low	Q9UGM5	Fetuin-B OS=Homo sapiens OX=9606 GN=FETUB PE=1 SV=2	0.053	1.68	2	1	1	1	1	382	42	0	1
Low	A0A0A0MRJ7	Coagulation factor V OS=Homo sapiens OX=9606 GN=F5 PE=1 SV=1	0.053	1.606	0	1	1	1	1	2229	252.1	0	1
Low	P00742	Coagulation factor X OS=Homo sapiens OX=9606 GN=F10 PE=1 SV=2	0.053	1.601	2	1	3	1	1	488	54.7	3.64	1
Low	H3BSJ8	Protein regulator of cytokinesis 1 (Fragment) OS=Homo sapiens OX=9606 GN=PRC1 PE=1 SV=1	0.053	1.585	35	1	1	1	1	46	4.7	2.36	1
Low	Q9UHB6	LIM domain and actin-binding protein 1 OS=Homo sapiens OX=9606 GN=LIMA1 PE=1 SV=1	0.056	1.517	1	1	2	1	1	759	85.2	4.47	1
Low	O75460	Serine/threonine-protein kinase/endoribonuclease IRE1 OS=Homo sapiens OX=9606 GN=ERN1 PE=1 SV=2	0.056	1.513	1	1	3	1	1	977	109.7	0	1
Low	Q9Y625	Glypican-6 OS=Homo sapiens OX=9606 GN=GPC6 PE=1 SV=1	0.058	1.449	1	1	3	1	1	555	62.7	4.49	1
Low	P61769	Beta-2-microglobulin OS=Homo sapiens OX=9606 GN=B2M PE=1 SV=1	0.064	1.377	8	1	1	1	1	119	13.7	0	1
Low	P49908	Selenoprotein P OS=Homo sapiens OX=9606 GN=SELENOP PE=1 SV=3	0.068	1.362	3	1	1	1	1	381	43.2	0	1
Low	P29622	Kallistatin OS=Homo sapiens OX=9606 GN=SERPINA4 PE=1 SV=3	0.067	1.36	2	1	2	1	1	427	48.5	0	1
Low	A0A7I2V4I5	Zinc finger CCCH-type containing 13 OS=Homo sapiens OX=9606 GN=ZC3H13 PE=1 SV=1	0.07	1.347	1	1	3	1	1	1669	196.6	0	1
Low	Q86VR7	V-set and immunoglobulin domain-containing protein 10-like OS=Homo sapiens OX=9606 GN=VSIG10L PE=2 SV=2	0.075	1.305	3	1	1	1	1	867	91.6	2.15	1
Low	A0A0B4J1U3	Immunoglobulin lambda variable 1-36 OS=Homo sapiens OX=9606 GN=IGLV1-36 PE=1 SV=5	0.083	1.292	18	1	1	1	1	117	12.5	0	1
Low	F5GWB4	Mitochondrial ribosomal protein L48 OS=Homo sapiens OX=9606 GN=MRPL48 PE=4 SV=1	0.083	1.287	40	1	1	1	1	52	5.7	0	1
Low	Q8WVF1	Protein OSCP1 OS=Homo sapiens OX=9606 GN=OSCP1 PE=1 SV=4	0.082	1.284	4	1	1	1	1	389	44.6	0	1
Low	A0A182DWH6	Glutathione peroxidase OS=Homo sapiens OX=9606 GN=GPX6 PE=3 SV=1	0.082	1.275	15	1	1	1	1	181	20	0	1
Low	Q53GG5	PDZ and LIM domain protein 3 OS=Homo sapiens OX=9606 GN=PDLIM3 PE=1 SV=1	0.083	1.21	4	1	1	1	1	364	39.2	0	1
Low	P49454	Centromere protein F OS=Homo sapiens OX=9606 GN=CENPF PE=1 SV=3	0.085	1.192	0	1	1	1	1	3114	357.3	0	1
Low	P04278	Sex hormone-binding globulin OS=Homo sapiens OX=9606 GN=SHBG PE=1 SV=2	0.102	1.188	5	1	1	1	1	402	43.8	0	1
Low	Q9NP78	ABC-type oligopeptide transporter ABCB9 OS=Homo sapiens OX=9606 GN=ABCB9 PE=1 SV=1	0.11	1.178	1	1	1	1	1	766	84.4	0	1

## Sheet: Amine nanoparticles
Protein FDR Confidence: Combined	Accession	Description	Exp. q-value: Combined	Sum PEP Score	Coverage [%]	# Peptides	# PSMs	# Unique Peptides	# Protein Groups	# AAs	MW [kDa]	Score Sequest HT: Sequest HT	# Peptides (by Search Engine): Sequest HT
High	P01024	Complement C3 OS=Homo sapiens OX=9606 GN=C3 PE=1 SV=2	0	690.519	72	123	1935	112	1	1663	187	4223.21	123
High	P02751	Fibronectin OS=Homo sapiens OX=9606 GN=FN1 PE=1 SV=5	0	549.08	46	86	2032	86	1	2477	272.2	5091.84	86
High	P04114	Apolipoprotein B-100 OS=Homo sapiens OX=9606 GN=APOB PE=1 SV=2	0	486.906	33	129	468	129	1	4563	515.3	677.49	129
High	P0C0L5	Complement C4-B OS=Homo sapiens OX=9606 GN=C4B PE=1 SV=2	0	449.472	53	84	1501	1	1	1744	192.6	3202.27	84
High	A0A140TA29	Complement C4-B OS=Homo sapiens OX=9606 GN=C4B PE=1 SV=1	0	430.514	51	80	1459	0	1	1698	187.5	3168.84	80
High	A0A0G2JPR0	Complement C4-A OS=Homo sapiens OX=9606 GN=C4A PE=1 SV=1	0	427.57	50	82	1457	0	1	1744	192.8	3109.49	82
High	P02671	Fibrinogen alpha chain OS=Homo sapiens OX=9606 GN=FGA PE=1 SV=2	0	419.535	56	68	1505	68	1	866	94.9	3560.23	68
High	A0A140TA32	Complement C4-A OS=Homo sapiens OX=9606 GN=C4A PE=1 SV=1	0	417.94	50	79	1449	0	1	1698	187.6	3152.97	79
High	P02675	Fibrinogen beta chain OS=Homo sapiens OX=9606 GN=FGB PE=1 SV=2	0	318.696	70	47	1285	47	1	491	55.9	3127.23	47
High	P02679	Fibrinogen gamma chain OS=Homo sapiens OX=9606 GN=FGG PE=1 SV=3	0	207.112	62	30	911	18	1	453	51.5	2470.31	30
High	P02649	Apolipoprotein E OS=Homo sapiens OX=9606 GN=APOE PE=1 SV=1	0	194.519	82	35	824	35	1	317	36.1	1775.03	35
High	P00734	Prothrombin OS=Homo sapiens OX=9606 GN=F2 PE=1 SV=2	0	168.613	45	34	544	34	1	622	70	1276.32	34
High	Q9Y490	Talin-1 OS=Homo sapiens OX=9606 GN=TLN1 PE=1 SV=3	0	163.032	25	44	107	44	1	2541	269.6	167.65	44
High	P04003	C4b-binding protein alpha chain OS=Homo sapiens OX=9606 GN=C4BPA PE=1 SV=2	0	147.742	41	25	696	25	1	597	67	1406.63	25
High	A0A8Q3SIA1	Sushi domain-containing protein OS=Homo sapiens OX=9606 PE=4 SV=1	0	146.273	21	30	318	27	1	1504	169.8	590.59	30
High	A0A0A0MRJ7	Coagulation factor V OS=Homo sapiens OX=9606 GN=F5 PE=1 SV=1	0	142.806	21	39	132	39	1	2229	252.1	191.07	39
High	P02768	Albumin OS=Homo sapiens OX=9606 GN=ALB PE=1 SV=2	0	129.328	45	33	602	33	1	609	69.3	1195.84	33
High	A0A0S2Z4L3	Protein S (Fragment) OS=Homo sapiens OX=9606 GN=PROS1 PE=1 SV=1	0	128.829	30	24	445	24	1	708	78.8	929.34	24
High	P02647	Apolipoprotein A-I OS=Homo sapiens OX=9606 GN=APOA1 PE=1 SV=1	0	120.259	76	28	401	28	1	267	30.8	681.6	28
High	P01042	Kininogen-1 OS=Homo sapiens OX=9606 GN=KNG1 PE=1 SV=2	0	110.712	33	27	175	27	1	644	71.9	297.38	27
High	C9JU00	Fibrinogen gamma chain (Fragment) OS=Homo sapiens OX=9606 GN=FGG PE=1 SV=1	0	89.334	72	13	494	1	1	123	14	1401	13
High	A0A8Q3SI22	Complement C3 (Fragment) OS=Homo sapiens OX=9606 GN=C3 PE=1 SV=1	0	83.806	79	13	366	2	1	198	21.8	982.88	13
High	P07996	Thrombospondin-1 OS=Homo sapiens OX=9606 GN=THBS1 PE=1 SV=2	0	83.555	21	20	106	20	1	1170	129.3	131.56	20
High	P04004	Vitronectin OS=Homo sapiens OX=9606 GN=VTN PE=1 SV=1	0	74.441	27	16	433	14	1	478	54.3	952.34	16
High	P01871	Immunoglobulin heavy constant mu OS=Homo sapiens OX=9606 GN=IGHM PE=1 SV=5	0	69.706	32	16	216	16	1	474	51.9	376.13	16
High	P21333	Filamin-A OS=Homo sapiens OX=9606 GN=FLNA PE=1 SV=4	0	68.788	13	21	49	21	1	2647	280.6	41.73	21
High	P19823	Inter-alpha-trypsin inhibitor heavy chain H2 OS=Homo sapiens OX=9606 GN=ITIH2 PE=1 SV=2	0	67.886	23	19	73	19	1	946	106.4	70.99	19
High	P10909	Clusterin OS=Homo sapiens OX=9606 GN=CLU PE=1 SV=1	0	66.977	34	16	172	16	1	449	52.5	245.38	16
High	A6PVI2	Plasminogen OS=Homo sapiens OX=9606 GN=PLG PE=1 SV=2	0	65.611	22	18	148	18	1	827	92.4	198	18
High	A0A8I5KWT8	Myosin heavy chain 9 OS=Homo sapiens OX=9606 GN=MYH9 PE=1 SV=1	0	65.488	16	22	48	22	1	1981	229	23.3	22
High	P07358	Complement component C8 beta chain OS=Homo sapiens OX=9606 GN=C8B PE=1 SV=4	0	64.044	27	13	94	13	1	591	66.9	165.59	13
High	P01857	Immunoglobulin heavy constant gamma 1 OS=Homo sapiens OX=9606 GN=IGHG1 PE=1 SV=2	0	63.982	39	13	234	6	1	399	43.9	460.46	13
High	P00450	Ceruloplasmin OS=Homo sapiens OX=9606 GN=CP PE=1 SV=1	0	63.505	23	19	58	19	1	1065	122.1	76.5	19
High	A0A8Q3SID6	Complement C5 OS=Homo sapiens OX=9606 GN=C5 PE=4 SV=1	0	61.661	16	20	62	20	1	1682	188.5	52.13	20
High	P01834	Immunoglobulin kappa constant OS=Homo sapiens OX=9606 GN=IGKC PE=1 SV=2	0	59.997	60	9	193	9	1	107	11.8	533.43	9
High	P01009	Alpha-1-antitrypsin OS=Homo sapiens OX=9606 GN=SERPINA1 PE=1 SV=3	0	57.342	44	15	72	15	1	418	46.7	108.71	15
High	P60709	Actin, cytoplasmic 1 OS=Homo sapiens OX=9606 GN=ACTB PE=1 SV=1	0	52.166	43	13	66	13	1	375	41.7	79.97	13
High	P01023	Alpha-2-macroglobulin OS=Homo sapiens OX=9606 GN=A2M PE=1 SV=3	0	51.68	14	16	46	16	1	1474	163.2	54.08	16
High	P04196	Histidine-rich glycoprotein OS=Homo sapiens OX=9606 GN=HRG PE=1 SV=1	0	51.659	20	11	162	11	1	525	59.5	212	11
High	P07357	Complement component C8 alpha chain OS=Homo sapiens OX=9606 GN=C8A PE=1 SV=2	0	51.619	22	12	98	12	1	584	65.1	153.11	12
High	P02748	Complement component C9 OS=Homo sapiens OX=9606 GN=C9 PE=1 SV=2	0	50.487	24	14	63	14	1	559	63.1	107.46	14
High	P02787	Serotransferrin OS=Homo sapiens OX=9606 GN=TF PE=1 SV=4	0	46.428	25	15	43	15	1	698	77	51.95	15
High	Q14520	Hyaluronan-binding protein 2 OS=Homo sapiens OX=9606 GN=HABP2 PE=1 SV=1	0	45.105	20	10	58	10	1	560	62.6	47.3	10
High	P19827	Inter-alpha-trypsin inhibitor heavy chain H1 OS=Homo sapiens OX=9606 GN=ITIH1 PE=1 SV=3	0	43.128	17	11	26	11	1	911	101.3	34.46	11
High	P0DOY2	Immunoglobulin lambda constant 2 OS=Homo sapiens OX=9606 GN=IGLC2 PE=1 SV=1	0	41.216	67	8	129	5	1	106	11.3	313.87	8
High	P02766	Transthyretin OS=Homo sapiens OX=9606 GN=TTR PE=1 SV=1	0	41.13	69	8	67	8	1	147	15.9	110.81	8
High	A0A9H4DHQ2	Immunoglobulin heavy constant gamma 3 (G3m marker) (Fragment) OS=Homo sapiens OX=9606 GN=IGHG3 PE=1 SV=1	0	40.942	17	8	109	1	1	446	49.1	150.19	8
High	P27169	Serum paraoxonase/arylesterase 1 OS=Homo sapiens OX=9606 GN=PON1 PE=1 SV=3	0	40.111	29	8	65	8	1	355	39.7	75.06	8
High	P00740	Coagulation factor IX OS=Homo sapiens OX=9606 GN=F9 PE=1 SV=2	0	39.239	20	8	81	8	1	461	51.7	74.76	8
High	P00738	Haptoglobin OS=Homo sapiens OX=9606 GN=HP PE=1 SV=1	0	38.613	28	12	62	7	1	406	45.2	53.35	12
High	Q9BWP8	Collectin-11 OS=Homo sapiens OX=9606 GN=COLEC11 PE=1 SV=1	0	36.664	29	9	25	9	1	271	28.6	47.47	9
High	G3V2W1	Protein Z-dependent protease inhibitor OS=Homo sapiens OX=9606 GN=SERPINA10 PE=1 SV=1	0	35.978	20	10	41	10	1	484	55.1	28.42	10
High	P01859	Immunoglobulin heavy constant gamma 2 OS=Homo sapiens OX=9606 GN=IGHG2 PE=1 SV=3	0	35.883	23	8	65	4	1	395	43.8	92.39	8
High	B4DPQ0	Complement C1r OS=Homo sapiens OX=9606 GN=C1R PE=1 SV=1	0	35.791	17	10	75	10	1	719	81.8	127.82	10
High	E7END6	Protein C, inactivator of coagulation factors Va and VIIIa OS=Homo sapiens OX=9606 GN=PROC PE=1 SV=1	0	34.396	20	8	76	8	1	495	55.4	116.43	8
High	P02743	Serum amyloid P-component OS=Homo sapiens OX=9606 GN=APCS PE=1 SV=2	0	34.14	29	9	96	9	1	223	25.4	160.95	9
High	P09871	Complement C1s subcomponent OS=Homo sapiens OX=9606 GN=C1S PE=1 SV=1	0	33.465	14	9	45	9	1	688	76.6	51.59	9
High	A0A0B4J231	Immunoglobulin lambda like polypeptide 5 OS=Homo sapiens OX=9606 GN=IGLL5 PE=1 SV=1	0	30.872	33	6	75	3	1	215	23.1	184.65	6
High	P01876	Immunoglobulin heavy constant alpha 1 OS=Homo sapiens OX=9606 GN=IGHA1 PE=1 SV=3	0	30.821	15	6	121	1	1	398	42.8	219.09	6
High	A0A0G2JMB2	Immunoglobulin heavy constant alpha 2 (Fragment) OS=Homo sapiens OX=9606 GN=IGHA2 PE=1 SV=1	0	29.949	18	6	86	1	1	340	36.5	142.64	6
High	A0A8Q3WM25	Complement C1q B chain OS=Homo sapiens OX=9606 GN=C1QB PE=1 SV=1	0	29.795	31	7	54	7	1	277	29.3	81.77	7
High	P07360	Complement component C8 gamma chain OS=Homo sapiens OX=9606 GN=C8G PE=1 SV=3	0	29.422	31	4	24	4	1	202	22.3	23.58	4
High	B0YIW2	Apolipoprotein C-III OS=Homo sapiens OX=9606 GN=APOC3 PE=1 SV=1	0	29.418	32	4	93	4	1	117	12.8	238.97	4
High	P01861	Immunoglobulin heavy constant gamma 4 OS=Homo sapiens OX=9606 GN=IGHG4 PE=1 SV=2	0	27.014	19	6	96	1	1	396	43.8	169.65	6
High	P00742	Coagulation factor X OS=Homo sapiens OX=9606 GN=F10 PE=1 SV=2	0	25.592	18	8	64	8	1	488	54.7	45.75	8
High	K7ER74	Apolipoprotein C-II OS=Homo sapiens OX=9606 GN=APOC4-APOC2 PE=1 SV=1	0	24.753	36	6	57	5	1	178	20	79.92	6
High	V9GYM3	Apolipoprotein A-II OS=Homo sapiens OX=9606 GN=APOA2 PE=1 SV=1	0	24.662	33	7	54	7	1	133	14.9	76.97	7
High	P20851	C4b-binding protein beta chain OS=Homo sapiens OX=9606 GN=C4BPB PE=1 SV=1	0	24.122	18	7	82	7	1	252	28.3	109.67	7
High	P02741	C-reactive protein OS=Homo sapiens OX=9606 GN=CRP PE=1 SV=1	0	23.635	25	6	94	6	1	224	25	241.66	6
High	D6RF35	Vitamin D-binding protein OS=Homo sapiens OX=9606 GN=GC PE=1 SV=1	0	23.444	19	7	19	7	1	476	53	25.28	7
High	Q08380	Galectin-3-binding protein OS=Homo sapiens OX=9606 GN=LGALS3BP PE=1 SV=1	0	22.959	12	6	20	6	1	585	65.3	29.05	6
High	P06727	Apolipoprotein A-IV OS=Homo sapiens OX=9606 GN=APOA4 PE=1 SV=4	0	22.337	24	8	19	8	1	396	45.3	6.09	8
High	C9JV77	Alpha-2-HS-glycoprotein OS=Homo sapiens OX=9606 GN=AHSG PE=1 SV=1	0	22.093	18	5	18	5	1	368	39.4	27.19	5
High	P02745	Complement C1q subcomponent subunit A OS=Homo sapiens OX=9606 GN=C1QA PE=1 SV=2	0	21.489	14	3	74	3	1	245	26	212.52	3
High	P22891	Vitamin K-dependent protein Z OS=Homo sapiens OX=9606 GN=PROZ PE=1 SV=2	0	21.242	14	6	34	6	1	400	44.7	32.83	6
High	B4E1Z4	Complement C2 OS=Homo sapiens OX=9606 PE=1 SV=1	0	20.617	6	7	17	7	1	1266	140.9	12.41	7
High	A0A7P0TAT8	Heat shock protein 90 beta family member 1 OS=Homo sapiens OX=9606 GN=HSP90B1 PE=1 SV=1	0	20.339	12	6	11	6	1	814	93.7	8.09	6
High	P01008	Antithrombin-III OS=Homo sapiens OX=9606 GN=SERPINC1 PE=1 SV=1	0	19.935	17	5	13	5	1	464	52.6	11.78	5
High	P67936	Tropomyosin alpha-4 chain OS=Homo sapiens OX=9606 GN=TPM4 PE=1 SV=3	0	19.872	31	7	12	3	1	248	28.5	7.02	7
High	P00739	Haptoglobin-related protein OS=Homo sapiens OX=9606 GN=HPR PE=2 SV=2	0	19.817	19	6	19	1	1	348	39	19.54	6
High	Q96IY4	Carboxypeptidase B2 OS=Homo sapiens OX=9606 GN=CPB2 PE=1 SV=2	0	19.582	11	5	18	5	1	423	48.4	35.56	5
High	P04406	Glyceraldehyde-3-phosphate dehydrogenase OS=Homo sapiens OX=9606 GN=GAPDH PE=1 SV=3	0	18.755	20	5	9	5	1	335	36	14.35	5
High	P49908	Selenoprotein P OS=Homo sapiens OX=9606 GN=SELENOP PE=1 SV=3	0	18.537	12	6	13	6	1	381	43.2	11.71	6
High	P13671	Complement component C6 OS=Homo sapiens OX=9606 GN=C6 PE=1 SV=3	0	18.198	5	5	13	5	1	934	104.7	18.62	5
High	P02747	Complement C1q subcomponent subunit C OS=Homo sapiens OX=9606 GN=C1QC PE=1 SV=3	0	17.982	21	4	71	4	1	245	25.8	129.27	4
High	Q8NI99	Angiopoietin-related protein 6 OS=Homo sapiens OX=9606 GN=ANGPTL6 PE=1 SV=1	0	17.669	13	5	10	5	1	470	51.7	14.98	5
High	H0YAC1	Uncharacterized protein (Fragment) OS=Homo sapiens OX=9606 PE=3 SV=1	0	17.364	7	5	8	5	1	686	76.8	6.91	5
High	A0A0B4J2B5	Immunoglobulin heavy variable 3/OR16-9 (non-functional) (Fragment) OS=Homo sapiens OX=9606 GN=IGHV3OR16-9 PE=1 SV=1	0	15.434	31	2	21	1	1	98	10.7	34.7	2
High	A0A096LPE2	SAA2-SAA4 readthrough OS=Homo sapiens OX=9606 GN=SAA2-SAA4 PE=3 SV=1	0	15.296	24	4	15	3	1	208	23.3	22.84	4
High	A0A804HKE2	Actinin alpha 1 OS=Homo sapiens OX=9606 GN=ACTN1 PE=1 SV=1	0	14.986	6	5	10	5	1	922	106.4	10.44	5
High	B7Z596	Tropomyosin 1 OS=Homo sapiens OX=9606 GN=TPM1 PE=1 SV=1	0	14.276	17	5	8	1	1	275	31.7	8.97	5
High	P49747	Cartilage oligomeric matrix protein OS=Homo sapiens OX=9606 GN=COMP PE=1 SV=2	0	14.239	7	3	11	3	1	757	82.8	18.92	3
High	P03951	Coagulation factor XI OS=Homo sapiens OX=9606 GN=F11 PE=1 SV=1	0	14.229	9	5	17	5	1	625	70.1	27.29	5
High	P06396	Gelsolin OS=Homo sapiens OX=9606 GN=GSN PE=1 SV=1	0	14.121	11	5	12	5	1	782	85.6	11.97	5
High	A0A4W8ZXM2	Immunoglobulin heavy variable 3-72 OS=Homo sapiens OX=9606 GN=IGHV3-72 PE=4 SV=1	0	13.986	26	2	17	1	1	101	11.2	27.4	2
High	E9PQD6	Serum amyloid A protein OS=Homo sapiens OX=9606 GN=SAA1 PE=1 SV=1	0	13.719	42	3	10	2	1	122	13.5	22	3
High	Q9H4B7	Tubulin beta-1 chain OS=Homo sapiens OX=9606 GN=TUBB1 PE=1 SV=1	0	13.711	16	5	7	5	1	451	50.3	4.45	5
High	Q13103	Secreted phosphoprotein 24 OS=Homo sapiens OX=9606 GN=SPP2 PE=1 SV=1	0	13.407	25	4	12	4	1	211	24.3	16.74	4
High	Q03591	Complement factor H-related protein 1 OS=Homo sapiens OX=9606 GN=CFHR1 PE=1 SV=2	0	13.278	12	4	73	1	1	330	37.6	106.96	4
High	H0YJW9	Uncharacterized protein (Fragment) OS=Homo sapiens OX=9606 PE=1 SV=3	0	12.725	18	3	49	1	1	148	17	68.52	3
High	B1AH94	Apolipoprotein L1 OS=Homo sapiens OX=9606 GN=APOL1 PE=1 SV=2	0	12.422	11	4	5	4	1	427	47.4	2.16	4
High	Q15582	Transforming growth factor-beta-induced protein ig-h3 OS=Homo sapiens OX=9606 GN=TGFBI PE=1 SV=1	0	11.912	9	5	10	5	1	683	74.6	0	5
High	P08514	Integrin alpha-IIb OS=Homo sapiens OX=9606 GN=ITGA2B PE=1 SV=3	0	11.426	8	4	4	4	1	1039	113.3	4.6	4
High	A0A1B0GVI3	Keratin 10 OS=Homo sapiens OX=9606 GN=KRT10 PE=1 SV=2	0	11.118	6	2	5	2	1	624	63.3	7.34	2
High	P08519	Apolipoprotein(a) OS=Homo sapiens OX=9606 GN=LPA PE=1 SV=2	0	10.967	6	4	24	4	1	2040	226.4	17.04	4
High	Q08830	Fibrinogen-like protein 1 OS=Homo sapiens OX=9606 GN=FGL1 PE=1 SV=3	0	10.778	10	3	10	3	1	312	36.4	12.43	3
High	P22352	Glutathione peroxidase 3 OS=Homo sapiens OX=9606 GN=GPX3 PE=1 SV=2	0	10.194	16	3	12	3	1	226	25.5	12.91	3
High	O00602	Ficolin-1 OS=Homo sapiens OX=9606 GN=FCN1 PE=1 SV=2	0	10.185	11	3	5	3	1	326	35.1	2.4	3
High	P08697	Alpha-2-antiplasmin OS=Homo sapiens OX=9606 GN=SERPINF2 PE=1 SV=3	0	10.132	9	3	7	3	1	491	54.5	9.71	3
High	P08567	Pleckstrin OS=Homo sapiens OX=9606 GN=PLEK PE=1 SV=3	0	9.852	14	3	9	3	1	350	40.1	19.48	3
High	P35443	Thrombospondin-4 OS=Homo sapiens OX=9606 GN=THBS4 PE=1 SV=2	0	9.492	3	2	4	2	1	961	105.8	6.6	2
High	Q9BXR6	Complement factor H-related protein 5 OS=Homo sapiens OX=9606 GN=CFHR5 PE=1 SV=1	0	9.379	5	4	7	4	1	569	64.4	6.15	4
High	A0A8I5KW61	C-X-C motif chemokine OS=Homo sapiens OX=9606 PE=3 SV=1	0	9.193	17	3	23	3	1	193	21.1	31.5	3
High	P11021	Endoplasmic reticulum chaperone BiP OS=Homo sapiens OX=9606 GN=HSPA5 PE=1 SV=2	0	9.099	6	3	5	3	1	654	72.3	0	3
High	P01591	Immunoglobulin J chain OS=Homo sapiens OX=9606 GN=JCHAIN PE=1 SV=4	0	8.384	17	3	24	3	1	159	18.1	14.56	3
High	E7EQ64	Serine protease 1 OS=Homo sapiens OX=9606 GN=PRSS1 PE=1 SV=1	0	8.226	7	2	57	2	1	261	28.1	84.48	2
High	P01619	Immunoglobulin kappa variable 3-20 OS=Homo sapiens OX=9606 GN=IGKV3-20 PE=1 SV=2	0	8.178	22	2	5	2	1	116	12.5	8.87	2
High	A0A0C4DH38	Immunoglobulin heavy variable 5-51 OS=Homo sapiens OX=9606 GN=IGHV5-51 PE=3 SV=1	0	8.162	30	3	6	3	1	117	12.7	4.08	3
High	O95810	Caveolae-associated protein 2 OS=Homo sapiens OX=9606 GN=CAVIN2 PE=1 SV=3	0	7.919	6	3	7	3	1	425	47.1	6.59	3
High	A0A0A0MTH3	Integrin-linked protein kinase OS=Homo sapiens OX=9606 GN=ILK PE=1 SV=1	0	7.769	6	3	6	3	1	483	54.6	3.99	3
High	P01011	Alpha-1-antichymotrypsin OS=Homo sapiens OX=9606 GN=SERPINA3 PE=1 SV=2	0	7.614	9	3	4	3	1	423	47.6	1.98	3
High	P08709	Coagulation factor VII OS=Homo sapiens OX=9606 GN=F7 PE=1 SV=1	0	7.569	9	2	2	2	1	466	51.6	2.97	2
High	P55056	Apolipoprotein C-IV OS=Homo sapiens OX=9606 GN=APOC4 PE=1 SV=1	0	7.52	27	3	5	2	1	127	14.5	2.24	3
High	P69905	Hemoglobin subunit alpha OS=Homo sapiens OX=9606 GN=HBA1 PE=1 SV=2	0	7.518	22	2	4	2	1	142	15.2	2.85	2
High	F5H5D3	Tubulin alpha chain OS=Homo sapiens OX=9606 GN=TUBA1C PE=1 SV=1	0	7.37	6	2	4	1	1	519	57.7	4.74	2
High	P07900	Heat shock protein HSP 90-alpha OS=Homo sapiens OX=9606 GN=HSP90AA1 PE=1 SV=5	0	7.116	4	3	5	3	1	732	84.6	5.52	3
High	B7ZKJ8	ITIH4 protein OS=Homo sapiens OX=9606 GN=ITIH4 PE=1 SV=1	0	6.653	4	3	4	3	1	935	103.8	1.77	3
High	P05106	Integrin beta-3 OS=Homo sapiens OX=9606 GN=ITGB3 PE=1 SV=2	0	6.624	4	2	3	2	1	788	87	0	2
High	A0A2R8Y6G6	phosphopyruvate hydratase OS=Homo sapiens OX=9606 GN=ENO1 PE=1 SV=1	0	6.175	6	2	2	2	1	434	47.3	0	2
High	P05160	Coagulation factor XIII B chain OS=Homo sapiens OX=9606 GN=F13B PE=1 SV=3	0	6.169	3	2	2	2	1	661	75.5	1.74	2
High	P68366	Tubulin alpha-4A chain OS=Homo sapiens OX=9606 GN=TUBA4A PE=1 SV=1	0	6.147	7	2	3	1	1	448	49.9	2.82	2
High	P48740	Mannan-binding lectin serine protease 1 OS=Homo sapiens OX=9606 GN=MASP1 PE=1 SV=3	0	6.126	4	2	4	2	1	699	79.2	3.81	2
High	A0A8V8TP41	FERM domain containing kindlin 3 OS=Homo sapiens OX=9606 GN=FERMT3 PE=1 SV=1	0	6.094	4	2	8	2	1	670	76.1	8.21	2
High	P04264	Keratin, type II cytoskeletal 1 OS=Homo sapiens OX=9606 GN=KRT1 PE=1 SV=6	0	6.073	4	2	3	2	1	644	66	4.27	2
High	P04217	Alpha-1B-glycoprotein OS=Homo sapiens OX=9606 GN=A1BG PE=1 SV=4	0	5.816	7	2	5	2	1	495	54.2	0	2
High	P07437	Tubulin beta chain OS=Homo sapiens OX=9606 GN=TUBB PE=1 SV=2	0	5.768	5	2	3	2	1	444	49.6	0	2
High	P03950	Angiogenin OS=Homo sapiens OX=9606 GN=ANG PE=1 SV=1	0	5.646	18	2	6	2	1	147	16.5	0	2
High	P00488	Coagulation factor XIII A chain OS=Homo sapiens OX=9606 GN=F13A1 PE=1 SV=5	0	5.567	3	2	4	2	1	732	83.2	3.91	2
High	A0A3B3ISX9	Tenascin XB OS=Homo sapiens OX=9606 GN=TNXB PE=1 SV=1	0	5.464	2	2	2	2	1	4491	485.1	2.59	2
High	B7Z6Z4	Myosin light chain 6 OS=Homo sapiens OX=9606 GN=MYL6 PE=1 SV=1	0	5.267	11	2	3	2	1	238	26.7	3.71	2
High	P80748	Immunoglobulin lambda variable 3-21 OS=Homo sapiens OX=9606 GN=IGLV3-21 PE=1 SV=2	0	5.201	14	1	6	1	1	117	12.4	13.39	1
High	P24593	Insulin-like growth factor-binding protein 5 OS=Homo sapiens OX=9606 GN=IGFBP5 PE=1 SV=1	0	5.18	4	1	2	1	1	272	30.6	5.9	1
High	C9JF17	Apolipoprotein D (Fragment) OS=Homo sapiens OX=9606 GN=APOD PE=1 SV=1	0	5.047	10	2	3	2	1	215	24.1	3.76	2
High	Q16610	Extracellular matrix protein 1 OS=Homo sapiens OX=9606 GN=ECM1 PE=1 SV=2	0	4.97	4	2	3	2	1	540	60.6	2.41	2
High	O00187	Mannan-binding lectin serine protease 2 OS=Homo sapiens OX=9606 GN=MASP2 PE=1 SV=4	0	4.905	4	2	5	2	1	686	75.7	0	2
High	P02654	Apolipoprotein C-I OS=Homo sapiens OX=9606 GN=APOC1 PE=1 SV=1	0	4.818	22	2	4	2	1	83	9.3	4.75	2
High	P02763	Alpha-1-acid glycoprotein 1 OS=Homo sapiens OX=9606 GN=ORM1 PE=1 SV=2	0	4.747	5	2	3	2	1	201	23.5	0	2
High	A0A087WW87	Immunoglobulin kappa variable 2-40 OS=Homo sapiens OX=9606 GN=IGKV2-40 PE=3 SV=2	0	4.259	11	1	3	1	1	121	13.3	5.54	1
High	A0A075B7D0	Immunoglobulin heavy variable 1/OR15-1 (non-functional) (Fragment) OS=Homo sapiens OX=9606 GN=IGHV1OR15-1 PE=1 SV=1	0	4.238	16	2	3	2	1	117	13	3.53	2
High	A0A0C4DH72	Immunoglobulin kappa variable 1-6 OS=Homo sapiens OX=9606 GN=IGKV1-6 PE=3 SV=1	0	4.035	14	1	2	1	1	117	12.7	3.69	1
High	P01706	Immunoglobulin lambda variable 2-11 OS=Homo sapiens OX=9606 GN=IGLV2-11 PE=1 SV=2	0	3.982	11	1	4	1	1	119	12.6	7.21	1
High	A0A075B7B8	Immunoglobulin heavy variable 3/OR16-12 (non-functional) (Fragment) OS=Homo sapiens OX=9606 GN=IGHV3OR16-12 PE=1 SV=1	0.003	3.535	9	1	3	1	1	117	12.9	3.83	1
High	P08493	Matrix Gla protein OS=Homo sapiens OX=9606 GN=MGP PE=1 SV=2	0.003	3.472	11	1	2	1	1	103	12.3	2.16	1
High	P01700	Immunoglobulin lambda variable 1-47 OS=Homo sapiens OX=9606 GN=IGLV1-47 PE=1 SV=2	0.003	3.47	11	1	4	1	1	117	12.3	4.23	1
Medium	E9PGN7	Serpin family G member 1 OS=Homo sapiens OX=9606 GN=SERPING1 PE=1 SV=1	0.016	3.354	2	1	1	1	1	543	59.5	1.66	1
Medium	P68871	Hemoglobin subunit beta OS=Homo sapiens OX=9606 GN=HBB PE=1 SV=2	0.016	3.312	9	1	2	1	1	147	16	3.51	1
Medium	C9JMN9	Protein disulfide-isomerase OS=Homo sapiens OX=9606 GN=PDIA4 PE=1 SV=2	0.016	3.281	2	1	1	1	1	694	78.5	0	1
Medium	P02753	Retinol-binding protein 4 OS=Homo sapiens OX=9606 GN=RBP4 PE=1 SV=3	0.016	3.268	5	1	2	1	1	201	23	0	1
Medium	Q8TD30	Alanine aminotransferase 2 OS=Homo sapiens OX=9606 GN=GPT2 PE=1 SV=1	0.017	3.042	2	1	1	1	1	523	57.9	2.17	1
Medium	A0A0U1RRH7	Histone H2A OS=Homo sapiens OX=9606 PE=3 SV=1	0.017	3.034	11	1	1	1	1	170	18.5	2.74	1
Medium	A0A075B6K0	Immunoglobulin lambda variable 3-16 OS=Homo sapiens OX=9606 GN=IGLV3-16 PE=3 SV=2	0.016	2.954	10	1	3	1	1	115	12.5	5.4	1
Medium	P02760	Protein AMBP OS=Homo sapiens OX=9606 GN=AMBP PE=1 SV=1	0.016	2.936	7	1	5	1	1	352	39	0	1
Medium	Q9Y6Z7	Collectin-10 OS=Homo sapiens OX=9606 GN=COLEC10 PE=1 SV=2	0.016	2.909	4	1	3	1	1	277	30.7	1.61	1
Medium	O75636	Ficolin-3 OS=Homo sapiens OX=9606 GN=FCN3 PE=1 SV=2	0.022	2.82	3	1	3	1	1	299	32.9	6.39	1
Medium	P17936	Insulin-like growth factor-binding protein 3 OS=Homo sapiens OX=9606 GN=IGFBP3 PE=1 SV=2	0.022	2.819	3	1	2	1	1	291	31.7	3.87	1
Medium	P04275	von Willebrand factor OS=Homo sapiens OX=9606 GN=VWF PE=1 SV=4	0.022	2.78	0	1	3	1	1	2813	309.1	1.61	1
Medium	P10643	Complement component C7 OS=Homo sapiens OX=9606 GN=C7 PE=1 SV=2	0.021	2.638	1	1	3	1	1	843	93.5	0	1
Medium	P01593	Immunoglobulin kappa variable 1D-33 OS=Homo sapiens OX=9606 GN=IGKV1D-33 PE=1 SV=2	0.021	2.623	14	1	1	1	1	117	12.8	0	1
Medium	P06312	Immunoglobulin kappa variable 4-1 OS=Homo sapiens OX=9606 GN=IGKV4-1 PE=1 SV=1	0.021	2.589	10	1	3	1	1	121	13.4	1.69	1
Medium	A0A075B6I9	Immunoglobulin lambda variable 7-46 OS=Homo sapiens OX=9606 GN=IGLV7-46 PE=3 SV=4	0.032	2.513	8	1	1	1	1	117	12.5	1.61	1
Medium	A0A0B4J2H0	Immunoglobulin heavy variable 1-69D OS=Homo sapiens OX=9606 GN=IGHV1-69D PE=1 SV=1	0.032	2.474	6	1	2	1	1	117	12.7	4.94	1
Medium	Q9UBX7	Kallikrein-11 OS=Homo sapiens OX=9606 GN=KLK11 PE=1 SV=2	0.032	2.435	2	1	5	1	1	282	31	5.66	1
Medium	P01704	Immunoglobulin lambda variable 2-14 OS=Homo sapiens OX=9606 GN=IGLV2-14 PE=1 SV=2	0.032	2.357	13	1	1	1	1	120	12.6	0	1
Medium	C9JPK5	Integrin beta OS=Homo sapiens OX=9606 GN=ITGB1 PE=1 SV=2	0.031	2.356	1	1	1	1	1	809	90	0	1
Medium	Q9ULV4	Coronin-1C OS=Homo sapiens OX=9606 GN=CORO1C PE=1 SV=1	0.037	2.287	3	1	1	1	1	474	53.2	0	1
Medium	P02790	Hemopexin OS=Homo sapiens OX=9606 GN=HPX PE=1 SV=2	0.037	2.238	2	1	5	1	1	462	51.6	3.72	1
Medium	Q96NG5	Zinc finger protein 558 OS=Homo sapiens OX=9606 GN=ZNF558 PE=1 SV=1	0.042	2.177	2	1	1	1	1	402	45.7	0	1
Medium	A0A0A0MRZ8	Immunoglobulin kappa variable 3D-11 OS=Homo sapiens OX=9606 GN=IGKV3D-11 PE=3 SV=6	0.042	2.117	8	1	2	1	1	115	12.6	1.64	1
Medium	O00411	DNA-directed RNA polymerase, mitochondrial OS=Homo sapiens OX=9606 GN=POLRMT PE=1 SV=2	0.042	2.087	1	1	2	1	1	1230	138.5	0	1
Medium	C9JZI7	Nucleosome assembly protein 1 like 4 OS=Homo sapiens OX=9606 GN=NAP1L4 PE=1 SV=2	0.048	1.914	3	1	1	1	1	398	45.5	0	1
Medium	A0A804F729	Pyruvate kinase OS=Homo sapiens OX=9606 GN=PKM PE=1 SV=1	0.049	1.91	1	1	1	1	1	605	65.9	0	1
Medium	P10646	Tissue factor pathway inhibitor OS=Homo sapiens OX=9606 GN=TFPI PE=1 SV=1	0.049	1.882	3	1	1	1	1	304	35	0	1
Low	P35858	Insulin-like growth factor-binding protein complex acid labile subunit OS=Homo sapiens OX=9606 GN=IGFALS PE=1 SV=1	0.061	1.872	2	1	2	1	1	605	66	0	1
Low	A0A994J439	Inter-alpha-trypsin inhibitor heavy chain 3 OS=Homo sapiens OX=9606 GN=ITIH3 PE=1 SV=1	0.061	1.803	1	1	2	1	1	927	103.7	0	1
Low	A0A8J9C4H3	Golgin B1 OS=Homo sapiens OX=9606 GN=GOLGB1 PE=1 SV=1	0.06	1.796	0	1	1	1	1	3264	376.3	0	1
Low	A0A0C4DFM7	RNA uridylyltransferase OS=Homo sapiens OX=9606 GN=TUT4 PE=1 SV=1	0.061	1.778	1	1	2	1	1	1645	185.1	0	1
Low	Q9NQ79	Cartilage acidic protein 1 OS=Homo sapiens OX=9606 GN=CRTAC1 PE=1 SV=2	0.061	1.774	2	1	1	1	1	661	71.4	1.63	1
Low	Q7L0Y3	tRNA methyltransferase 10 homolog C OS=Homo sapiens OX=9606 GN=TRMT10C PE=1 SV=2	0.062	1.745	4	1	1	1	1	403	47.3	0	1
Low	Q8NHQ8	Ras association domain-containing protein 8 OS=Homo sapiens OX=9606 GN=RASSF8 PE=1 SV=2	0.062	1.725	2	1	4	1	1	419	48.3	8.32	1
Low	Q15645	Pachytene checkpoint protein 2 homolog OS=Homo sapiens OX=9606 GN=TRIP13 PE=1 SV=2	0.061	1.72	3	1	1	1	1	432	48.5	0	1
Low	Q13395	Probable methyltransferase TARBP1 OS=Homo sapiens OX=9606 GN=TARBP1 PE=1 SV=1	0.061	1.716	0	1	2	1	1	1621	181.6	1.68	1

## Sheet: Carboxylate nanoparticles
Protein FDR Confidence: Combined	Accession	Description	Exp. q-value: Combined	Sum PEP Score	Coverage [%]	# Peptides	# PSMs	# Unique Peptides	# Protein Groups	# AAs	MW [kDa]	Score Sequest HT: Sequest HT	# Peptides (by Search Engine): Sequest HT
High	P01024	Complement C3 OS=Homo sapiens OX=9606 GN=C3 PE=1 SV=2	0	531.432	68	108	975	97	1	1663	187	2546.28	108
High	P04114	Apolipoprotein B-100 OS=Homo sapiens OX=9606 GN=APOB PE=1 SV=2	0	270.833	21	77	234	77	1	4563	515.3	362.82	77
High	P0C0L5	Complement C4-B OS=Homo sapiens OX=9606 GN=C4B PE=1 SV=2	0	196.232	34	49	317	49	1	1744	192.6	612.61	49
High	P01042	Kininogen-1 OS=Homo sapiens OX=9606 GN=KNG1 PE=1 SV=2	0	157.541	40	36	448	36	1	644	71.9	1042.57	36
High	P02649	Apolipoprotein E OS=Homo sapiens OX=9606 GN=APOE PE=1 SV=1	0	140.921	77	33	408	33	1	317	36.1	1053.16	33
High	A0A0A0MRJ7	Coagulation factor V OS=Homo sapiens OX=9606 GN=F5 PE=1 SV=1	0	125.245	20	36	139	36	1	2229	252.1	245.1	36
High	P04196	Histidine-rich glycoprotein OS=Homo sapiens OX=9606 GN=HRG PE=1 SV=1	0	107.793	37	19	312	19	1	525	59.5	735.53	19
High	Q9Y490	Talin-1 OS=Homo sapiens OX=9606 GN=TLN1 PE=1 SV=3	0	103.754	16	28	61	28	1	2541	269.6	107.1	28
High	P02647	Apolipoprotein A-I OS=Homo sapiens OX=9606 GN=APOA1 PE=1 SV=1	0	98.822	78	27	170	27	1	267	30.8	343.82	27
High	A0A8Q3SIA1	Sushi domain-containing protein OS=Homo sapiens OX=9606 PE=4 SV=1	0	95.299	19	22	164	19	1	1504	169.8	363.5	22
High	Q92954	Proteoglycan 4 OS=Homo sapiens OX=9606 GN=PRG4 PE=1 SV=3	0	89.125	16	20	150	20	1	1404	151	286.53	20
High	P02671	Fibrinogen alpha chain OS=Homo sapiens OX=9606 GN=FGA PE=1 SV=2	0	85.194	29	19	88	19	1	866	94.9	149.69	19
High	P02768	Albumin OS=Homo sapiens OX=9606 GN=ALB PE=1 SV=2	0	85.035	33	26	261	26	1	609	69.3	514.72	26
High	A0A8Q3SI22	Complement C3 (Fragment) OS=Homo sapiens OX=9606 GN=C3 PE=1 SV=1	0	84.48	79	13	122	2	1	198	21.8	363.87	13
High	A0A8I5KWT8	Myosin heavy chain 9 OS=Homo sapiens OX=9606 GN=MYH9 PE=1 SV=1	0	73.769	15	22	35	22	1	1981	229	52.13	22
High	P02675	Fibrinogen beta chain OS=Homo sapiens OX=9606 GN=FGB PE=1 SV=2	0	69.139	47	18	59	18	1	491	55.9	106.21	18
High	P04004	Vitronectin OS=Homo sapiens OX=9606 GN=VTN PE=1 SV=1	0	66.319	31	15	350	12	1	478	54.3	844.16	15
High	P01857	Immunoglobulin heavy constant gamma 1 OS=Homo sapiens OX=9606 GN=IGHG1 PE=1 SV=2	0	59.105	29	10	108	5	1	399	43.9	222.35	10
High	P02745	Complement C1q subcomponent subunit A OS=Homo sapiens OX=9606 GN=C1QA PE=1 SV=2	0	58.993	37	7	325	7	1	245	26	1066.93	7
High	P07358	Complement component C8 beta chain OS=Homo sapiens OX=9606 GN=C8B PE=1 SV=4	0	56.949	31	15	56	15	1	591	66.9	121.81	15
High	P21333	Filamin-A OS=Homo sapiens OX=9606 GN=FLNA PE=1 SV=4	0	52.595	11	18	38	18	1	2647	280.6	60.09	18
High	P03951	Coagulation factor XI OS=Homo sapiens OX=9606 GN=F11 PE=1 SV=1	0	51.508	24	14	158	14	1	625	70.1	460.38	14
High	P07996	Thrombospondin-1 OS=Homo sapiens OX=9606 GN=THBS1 PE=1 SV=2	0	48.561	17	15	60	15	1	1170	129.3	83.58	15
High	P01834	Immunoglobulin kappa constant OS=Homo sapiens OX=9606 GN=IGKC PE=1 SV=2	0	46.551	60	8	79	8	1	107	11.8	254.05	8
High	H0YAC1	Uncharacterized protein (Fragment) OS=Homo sapiens OX=9606 PE=3 SV=1	0	45.232	17	14	117	14	1	686	76.8	185.98	14
High	P05155	Plasma protease C1 inhibitor OS=Homo sapiens OX=9606 GN=SERPING1 PE=1 SV=2	0	43.95	23	11	60	11	1	500	55.1	127.43	11
High	P10909	Clusterin OS=Homo sapiens OX=9606 GN=CLU PE=1 SV=1	0	40.834	26	9	66	9	1	449	52.5	151.6	9
High	P02787	Serotransferrin OS=Homo sapiens OX=9606 GN=TF PE=1 SV=4	0	40.702	15	10	42	10	1	698	77	55.32	10
High	P02766	Transthyretin OS=Homo sapiens OX=9606 GN=TTR PE=1 SV=1	0	40.628	69	7	33	7	1	147	15.9	69	7
High	A0A024R6N5	Alpha-1-antitrypsin OS=Homo sapiens OX=9606 GN=SERPINA1 PE=1 SV=1	0	39.576	31	9	30	9	1	418	46.7	74.16	9
High	P02751	Fibronectin OS=Homo sapiens OX=9606 GN=FN1 PE=1 SV=5	0	39.261	8	11	17	11	1	2477	272.2	21.97	11
High	P05452	Tetranectin OS=Homo sapiens OX=9606 GN=CLEC3B PE=1 SV=3	0	38.777	45	7	33	7	1	202	22.5	90.18	7
High	O00391	Sulfhydryl oxidase 1 OS=Homo sapiens OX=9606 GN=QSOX1 PE=1 SV=3	0	38.122	17	10	24	10	1	747	82.5	44.84	10
High	P60709	Actin, cytoplasmic 1 OS=Homo sapiens OX=9606 GN=ACTB PE=1 SV=1	0	36.877	33	9	39	9	1	375	41.7	65.45	9
High	C9JC84	Fibrinogen gamma chain OS=Homo sapiens OX=9606 GN=FGG PE=1 SV=1	0	35.604	25	8	48	8	1	461	52.3	97.59	8
High	P02788	Lactotransferrin OS=Homo sapiens OX=9606 GN=LTF PE=1 SV=6	0	34.758	12	6	17	6	1	710	78.1	27.34	6
High	A0A8Q3WM25	Complement C1q B chain OS=Homo sapiens OX=9606 GN=C1QB PE=1 SV=1	0	34.512	32	8	99	8	1	277	29.3	231.15	8
High	P01023	Alpha-2-macroglobulin OS=Homo sapiens OX=9606 GN=A2M PE=1 SV=3	0	34.455	9	10	16	10	1	1474	163.2	26.39	10
High	A6PVI2	Plasminogen OS=Homo sapiens OX=9606 GN=PLG PE=1 SV=2	0	34.098	18	13	74	13	1	827	92.4	88.24	13
High	P01871	Immunoglobulin heavy constant mu OS=Homo sapiens OX=9606 GN=IGHM PE=1 SV=5	0	33.085	21	9	71	9	1	474	51.9	120.29	9
High	B0YIW2	Apolipoprotein C-III OS=Homo sapiens OX=9606 GN=APOC3 PE=1 SV=1	0	32.554	35	5	51	5	1	117	12.8	121.81	5
High	A0A9H4DHQ2	Immunoglobulin heavy constant gamma 3 (G3m marker) (Fragment) OS=Homo sapiens OX=9606 GN=IGHG3 PE=1 SV=1	0	29.331	14	7	51	1	1	446	49.1	92.06	7
High	P02747	Complement C1q subcomponent subunit C OS=Homo sapiens OX=9606 GN=C1QC PE=1 SV=3	0	26.232	22	5	86	5	1	245	25.8	275.49	5
High	P0DOY2	Immunoglobulin lambda constant 2 OS=Homo sapiens OX=9606 GN=IGLC2 PE=1 SV=1	0	25.255	42	3	49	2	1	106	11.3	131.93	3
High	Q9BWP8	Collectin-11 OS=Homo sapiens OX=9606 GN=COLEC11 PE=1 SV=1	0	24.851	25	6	14	6	1	271	28.6	31.64	6
High	P00738	Haptoglobin OS=Homo sapiens OX=9606 GN=HP PE=1 SV=1	0	24.675	18	9	35	9	1	406	45.2	50.34	9
High	A0A8V8TP41	FERM domain containing kindlin 3 OS=Homo sapiens OX=9606 GN=FERMT3 PE=1 SV=1	0	24.672	17	7	13	7	1	670	76.1	16.28	7
High	P26038	Moesin OS=Homo sapiens OX=9606 GN=MSN PE=1 SV=3	0	24.494	16	10	21	10	1	577	67.8	21.46	10
High	P01876	Immunoglobulin heavy constant alpha 1 OS=Homo sapiens OX=9606 GN=IGHA1 PE=1 SV=3	0	24.21	15	5	35	2	1	398	42.8	73.59	5
High	P00450	Ceruloplasmin OS=Homo sapiens OX=9606 GN=CP PE=1 SV=1	0	23.625	10	6	13	6	1	1065	122.1	25.36	6
High	B7ZKJ8	ITIH4 protein OS=Homo sapiens OX=9606 GN=ITIH4 PE=1 SV=1	0	23.122	10	9	21	9	1	935	103.8	35.43	9
High	A0A0B4J231	Immunoglobulin lambda like polypeptide 5 OS=Homo sapiens OX=9606 GN=IGLL5 PE=1 SV=1	0	22.47	24	4	31	3	1	215	23.1	81.19	4
High	K7ER74	Apolipoprotein C-II OS=Homo sapiens OX=9606 GN=APOC4-APOC2 PE=1 SV=1	0	20.397	35	5	48	4	1	178	20	120.89	5
High	Q15582	Transforming growth factor-beta-induced protein ig-h3 OS=Homo sapiens OX=9606 GN=TGFBI PE=1 SV=1	0	20.373	14	6	12	6	1	683	74.6	19.18	6
High	D6RAR4	HGF activator OS=Homo sapiens OX=9606 GN=HGFAC PE=1 SV=1	0	20.218	6	3	19	3	1	662	71.4	37.08	3
High	A0A0G2JMB2	Immunoglobulin heavy constant alpha 2 (Fragment) OS=Homo sapiens OX=9606 GN=IGHA2 PE=1 SV=1	0	20.038	14	4	23	1	1	340	36.5	54.3	4
High	Q03591	Complement factor H-related protein 1 OS=Homo sapiens OX=9606 GN=CFHR1 PE=1 SV=2	0	19.754	30	6	52	2	1	330	37.6	105.46	6
High	P07357	Complement component C8 alpha chain OS=Homo sapiens OX=9606 GN=C8A PE=1 SV=2	0	19.478	14	6	12	6	1	584	65.1	24.34	6
High	P00748	Coagulation factor XII OS=Homo sapiens OX=9606 GN=F12 PE=1 SV=3	0	19.008	10	6	39	6	1	615	67.7	82.9	6
High	Q15113	Procollagen C-endopeptidase enhancer 1 OS=Homo sapiens OX=9606 GN=PCOLCE PE=1 SV=2	0	18.387	16	5	15	5	1	449	47.9	18.7	5
High	A0A8I5KW61	C-X-C motif chemokine OS=Homo sapiens OX=9606 PE=3 SV=1	0	18.007	22	5	32	5	1	193	21.1	56.72	5
High	P01859	Immunoglobulin heavy constant gamma 2 OS=Homo sapiens OX=9606 GN=IGHG2 PE=1 SV=3	0	17.701	17	6	30	2	1	395	43.8	59.26	6
High	Q96IY4	Carboxypeptidase B2 OS=Homo sapiens OX=9606 GN=CPB2 PE=1 SV=2	0	17.013	13	4	14	4	1	423	48.4	22.63	4
High	P49908	Selenoprotein P OS=Homo sapiens OX=9606 GN=SELENOP PE=1 SV=3	0	16.175	12	6	38	6	1	381	43.2	66.15	6
High	P04406	Glyceraldehyde-3-phosphate dehydrogenase OS=Homo sapiens OX=9606 GN=GAPDH PE=1 SV=3	0	15.587	20	4	9	4	1	335	36	21.79	4
High	Q9BXR6	Complement factor H-related protein 5 OS=Homo sapiens OX=9606 GN=CFHR5 PE=1 SV=1	0	15.227	10	6	24	5	1	569	64.4	17.25	6
High	B4E1Z4	Complement C2 OS=Homo sapiens OX=9606 PE=1 SV=1	0	15.141	4	3	4	3	1	1266	140.9	8.41	3
High	P61626	Lysozyme C OS=Homo sapiens OX=9606 GN=LYZ PE=1 SV=1	0	14.75	34	6	28	6	1	148	16.5	33.54	6
High	A0A096LPE2	SAA2-SAA4 readthrough OS=Homo sapiens OX=9606 GN=SAA2-SAA4 PE=3 SV=1	0	14.493	28	5	22	4	1	208	23.3	12.87	5
High	P24593	Insulin-like growth factor-binding protein 5 OS=Homo sapiens OX=9606 GN=IGFBP5 PE=1 SV=1	0	13.489	17	5	19	5	1	272	30.6	17.53	5
High	Q14520	Hyaluronan-binding protein 2 OS=Homo sapiens OX=9606 GN=HABP2 PE=1 SV=1	0	13.365	7	4	18	4	1	560	62.6	18.42	4
High	P04003	C4b-binding protein alpha chain OS=Homo sapiens OX=9606 GN=C4BPA PE=1 SV=2	0	12.669	8	5	9	5	1	597	67	11.19	5
High	P05154	Plasma serine protease inhibitor OS=Homo sapiens OX=9606 GN=SERPINA5 PE=1 SV=3	0	12.63	12	4	6	4	1	406	45.6	11	4
High	P15169	Carboxypeptidase N catalytic chain OS=Homo sapiens OX=9606 GN=CPN1 PE=1 SV=1	0	12.315	14	4	10	4	1	458	52.3	14.21	4
High	P06727	Apolipoprotein A-IV OS=Homo sapiens OX=9606 GN=APOA4 PE=1 SV=4	0	12.096	13	4	7	4	1	396	45.3	4.93	4
High	H0YJW9	Uncharacterized protein (Fragment) OS=Homo sapiens OX=9606 PE=1 SV=3	0	11.687	33	4	25	1	1	148	17	53.18	4
High	P01011	Alpha-1-antichymotrypsin OS=Homo sapiens OX=9606 GN=SERPINA3 PE=1 SV=2	0	11.239	9	2	2	2	1	423	47.6	7.05	2
High	Q13103	Secreted phosphoprotein 24 OS=Homo sapiens OX=9606 GN=SPP2 PE=1 SV=1	0	11.044	27	5	16	5	1	211	24.3	9.86	5
High	P07360	Complement component C8 gamma chain OS=Homo sapiens OX=9606 GN=C8G PE=1 SV=3	0	10.894	24	3	6	3	1	202	22.3	8.29	3
High	P06396	Gelsolin OS=Homo sapiens OX=9606 GN=GSN PE=1 SV=1	0	10.777	4	3	5	3	1	782	85.6	9.46	3
High	P08514	Integrin alpha-IIb OS=Homo sapiens OX=9606 GN=ITGA2B PE=1 SV=3	0	10.379	5	3	7	3	1	1039	113.3	8.45	3
High	P27169	Serum paraoxonase/arylesterase 1 OS=Homo sapiens OX=9606 GN=PON1 PE=1 SV=3	0	10.186	7	2	8	2	1	355	39.7	18.98	2
High	P08567	Pleckstrin OS=Homo sapiens OX=9606 GN=PLEK PE=1 SV=3	0	9.816	14	2	5	2	1	350	40.1	14.09	2
High	Q9H4B7	Tubulin beta-1 chain OS=Homo sapiens OX=9606 GN=TUBB1 PE=1 SV=1	0	9.719	11	4	5	4	1	451	50.3	7.35	4
High	A0A804F729	Pyruvate kinase OS=Homo sapiens OX=9606 GN=PKM PE=1 SV=1	0	9.533	7	3	4	3	1	605	65.9	6.78	3
High	V9GYM3	Apolipoprotein A-II OS=Homo sapiens OX=9606 GN=APOA2 PE=1 SV=1	0	9.197	26	4	19	4	1	133	14.9	36.86	4
High	D6RF35	Vitamin D-binding protein OS=Homo sapiens OX=9606 GN=GC PE=1 SV=1	0	9.102	8	3	7	3	1	476	53	19.74	3
High	F5H5D3	Tubulin alpha chain OS=Homo sapiens OX=9606 GN=TUBA1C PE=1 SV=1	0	8.818	10	3	4	3	1	519	57.7	8.42	3
High	P01619	Immunoglobulin kappa variable 3-20 OS=Homo sapiens OX=9606 GN=IGKV3-20 PE=1 SV=2	0	8.374	22	2	5	2	1	116	12.5	10.09	2
High	P01008	Antithrombin-III OS=Homo sapiens OX=9606 GN=SERPINC1 PE=1 SV=1	0	8.371	8	2	5	2	1	464	52.6	9.54	2
High	P19823	Inter-alpha-trypsin inhibitor heavy chain H2 OS=Homo sapiens OX=9606 GN=ITIH2 PE=1 SV=2	0	8.253	5	3	4	3	1	946	106.4	1.95	3
High	P55056	Apolipoprotein C-IV OS=Homo sapiens OX=9606 GN=APOC4 PE=1 SV=1	0	7.998	32	4	13	3	1	127	14.5	9.25	4
High	P03950	Angiogenin OS=Homo sapiens OX=9606 GN=ANG PE=1 SV=1	0	7.935	25	3	5	3	1	147	16.5	0	3
High	P19827	Inter-alpha-trypsin inhibitor heavy chain H1 OS=Homo sapiens OX=9606 GN=ITIH1 PE=1 SV=3	0	7.522	4	2	3	2	1	911	101.3	4.74	2
High	A0A0A0MTH3	Integrin-linked protein kinase OS=Homo sapiens OX=9606 GN=ILK PE=1 SV=1	0	7.358	8	4	4	4	1	483	54.6	1.78	4
High	P02760	Protein AMBP OS=Homo sapiens OX=9606 GN=AMBP PE=1 SV=1	0	7.163	9	2	8	2	1	352	39	10.37	2
High	B4DPQ0	Complement C1r OS=Homo sapiens OX=9606 GN=C1R PE=1 SV=1	0	7.031	4	1	3	1	1	719	81.8	5.04	1
High	P00734	Prothrombin OS=Homo sapiens OX=9606 GN=F2 PE=1 SV=2	0	6.727	4	2	4	2	1	622	70	2.19	2
High	B7Z6Z4	Myosin light chain 6 OS=Homo sapiens OX=9606 GN=MYL6 PE=1 SV=1	0	6.5	9	2	5	2	1	238	26.7	4.12	2
High	A0A7P0TB45	Peptidyl-prolyl cis-trans isomerase OS=Homo sapiens OX=9606 GN=PPIB PE=1 SV=1	0	6.146	10	2	3	2	1	216	23.8	4.65	2
High	P04217	Alpha-1B-glycoprotein OS=Homo sapiens OX=9606 GN=A1BG PE=1 SV=4	0	5.807	11	3	5	3	1	495	54.2	0	3
High	P05164	Myeloperoxidase OS=Homo sapiens OX=9606 GN=MPO PE=1 SV=1	0	5.465	3	1	1	1	1	745	83.8	3.44	1
High	K7ERG9	Complement factor D OS=Homo sapiens OX=9606 GN=CFD PE=1 SV=1	0	5.32	10	2	5	2	1	260	27.8	4.98	2
High	Q9Y6Z7	Collectin-10 OS=Homo sapiens OX=9606 GN=COLEC10 PE=1 SV=2	0	5.311	5	1	1	1	1	277	30.7	3.23	1
High	Q99969	Retinoic acid receptor responder protein 2 OS=Homo sapiens OX=9606 GN=RARRES2 PE=1 SV=1	0	5.244	17	2	2	2	1	163	18.6	2.45	2
High	P02654	Apolipoprotein C-I OS=Homo sapiens OX=9606 GN=APOC1 PE=1 SV=1	0	5.026	35	3	10	3	1	83	9.3	10.39	3
High	E7EQ64	Serine protease 1 OS=Homo sapiens OX=9606 GN=PRSS1 PE=1 SV=1	0	4.659	7	2	22	2	1	261	28.1	38.56	2
High	P17936	Insulin-like growth factor-binding protein 3 OS=Homo sapiens OX=9606 GN=IGFBP3 PE=1 SV=2	0	4.621	8	2	11	2	1	291	31.7	17.31	2
High	P35527	Keratin, type I cytoskeletal 9 OS=Homo sapiens OX=9606 GN=KRT9 PE=1 SV=3	0	4.569	4	1	2	1	1	623	62	1.87	1
High	P0DJI8	Serum amyloid A-1 protein OS=Homo sapiens OX=9606 GN=SAA1 PE=1 SV=1	0	4.478	25	2	6	1	1	122	13.5	2.56	2
High	P34096	Ribonuclease 4 OS=Homo sapiens OX=9606 GN=RNASE4 PE=1 SV=3	0	4.278	18	2	6	2	1	147	16.8	0	2
High	A0A1B0GVI3	Keratin 10 OS=Homo sapiens OX=9606 GN=KRT10 PE=1 SV=2	0	4.227	4	1	1	1	1	624	63.3	3.15	1
High	P08697	Alpha-2-antiplasmin OS=Homo sapiens OX=9606 GN=SERPINF2 PE=1 SV=3	0	4.022	4	1	1	1	1	491	54.5	4.43	1
High	Q13201	Multimerin-1 OS=Homo sapiens OX=9606 GN=MMRN1 PE=1 SV=3	0	3.914	2	2	2	2	1	1228	138	0	2
High	P02749	Beta-2-glycoprotein 1 OS=Homo sapiens OX=9606 GN=APOH PE=1 SV=3	0	3.728	5	2	4	2	1	345	38.3	9.22	2
High	P01591	Immunoglobulin J chain OS=Homo sapiens OX=9606 GN=JCHAIN PE=1 SV=4	0	3.682	8	1	7	1	1	159	18.1	12.77	1
High	P12830	Cadherin-1 OS=Homo sapiens OX=9606 GN=CDH1 PE=1 SV=3	0	3.48	1	1	3	1	1	882	97.4	2.09	1
High	A0A4W8ZXM2	Immunoglobulin heavy variable 3-72 OS=Homo sapiens OX=9606 GN=IGHV3-72 PE=4 SV=1	0	3.472	26	2	7	1	1	101	11.2	13.89	2
High	A0A0B4J2B5	Immunoglobulin heavy variable 3/OR16-9 (non-functional) (Fragment) OS=Homo sapiens OX=9606 GN=IGHV3OR16-9 PE=1 SV=1	0	3.359	31	2	7	1	1	98	10.7	13.89	2
High	Q15404	Ras suppressor protein 1 OS=Homo sapiens OX=9606 GN=RSU1 PE=1 SV=3	0	3.298	6	1	1	1	1	277	31.5	2.76	1
High	P02748	Complement component C9 OS=Homo sapiens OX=9606 GN=C9 PE=1 SV=2	0	3.197	2	1	2	1	1	559	63.1	2.78	1
High	P13224	Platelet glycoprotein Ib beta chain OS=Homo sapiens OX=9606 GN=GP1BB PE=1 SV=1	0	3.123	5	1	1	1	1	206	21.7	1.87	1
High	P01700	Immunoglobulin lambda variable 1-47 OS=Homo sapiens OX=9606 GN=IGLV1-47 PE=1 SV=2	0	2.935	11	1	3	1	1	117	12.3	4.26	1
High	P22692	Insulin-like growth factor-binding protein 4 OS=Homo sapiens OX=9606 GN=IGFBP4 PE=1 SV=2	0	2.834	5	2	4	2	1	258	27.9	1.7	2
High	P02790	Hemopexin OS=Homo sapiens OX=9606 GN=HPX PE=1 SV=2	0	2.788	5	2	4	2	1	462	51.6	5.51	2
High	P62979	Ubiquitin-ribosomal protein eS31 fusion protein OS=Homo sapiens OX=9606 GN=RPS27A PE=1 SV=2	0	2.623	10	1	1	1	1	156	18	2.48	1
High	C9JV77	Alpha-2-HS-glycoprotein OS=Homo sapiens OX=9606 GN=AHSG PE=1 SV=1	0	2.57	5	1	1	1	1	368	39.4	2.36	1
High	A0A8J8ZCA0	Lipoprotein(a) (Fragment) OS=Homo sapiens OX=9606 GN=LPA PE=1 SV=1	0	2.522	3	1	6	1	1	613	68.7	5.62	1
High	Q8NI99	Angiopoietin-related protein 6 OS=Homo sapiens OX=9606 GN=ANGPTL6 PE=1 SV=1	0	2.507	3	1	2	1	1	470	51.7	1.71	1
High	P01019	Angiotensinogen OS=Homo sapiens OX=9606 GN=AGT PE=1 SV=3	0	2.431	2	1	2	1	1	485	53.1	3.71	1
High	J3QRS3	Myosin light chain 12A OS=Homo sapiens OX=9606 GN=MYL12A PE=1 SV=1	0	2.39	6	1	1	1	1	177	20.4	0	1
High	C9JF17	Apolipoprotein D (Fragment) OS=Homo sapiens OX=9606 GN=APOD PE=1 SV=1	0	2.376	3	1	3	1	1	215	24.1	0	1
High	P02763	Alpha-1-acid glycoprotein 1 OS=Homo sapiens OX=9606 GN=ORM1 PE=1 SV=2	0	2.346	4	1	3	1	1	201	23.5	5.68	1
High	P00325	All-trans-retinol dehydrogenase [NAD(+)] ADH1B OS=Homo sapiens OX=9606 GN=ADH1B PE=1 SV=3	0	2.257	3	1	4	1	1	375	39.8	0	1
High	P18065	Insulin-like growth factor-binding protein 2 OS=Homo sapiens OX=9606 GN=IGFBP2 PE=1 SV=2	0	2.22	4	1	1	1	1	325	34.8	2.47	1
High	A0A087WUZ3	Spectrin beta chain OS=Homo sapiens OX=9606 GN=SPTBN1 PE=1 SV=1	0.002	2.158	0	1	3	1	1	2366	274.7	3.3	1
High	A0A075B7B8	Immunoglobulin heavy variable 3/OR16-12 (non-functional) (Fragment) OS=Homo sapiens OX=9606 GN=IGHV3OR16-12 PE=1 SV=1	0.002	2.06	9	1	3	1	1	117	12.9	0	1
High	A0A0U1RRH7	Histone H2A OS=Homo sapiens OX=9606 PE=3 SV=1	0.005	1.893	4	1	1	1	1	170	18.5	2	1
High	A0A087X1R1	Smoothelin OS=Homo sapiens OX=9606 GN=SMTN PE=1 SV=1	0.005	1.792	1	1	2	1	1	1002	108	0	1
High	P19652	Alpha-1-acid glycoprotein 2 OS=Homo sapiens OX=9606 GN=ORM2 PE=1 SV=2	0.005	1.729	4	1	1	1	1	201	23.6	0	1
High	P05109	Protein S100-A8 OS=Homo sapiens OX=9606 GN=S100A8 PE=1 SV=1	0.005	1.677	12	1	1	1	1	93	10.8	0	1
High	Q9UQE7	Structural maintenance of chromosomes protein 3 OS=Homo sapiens OX=9606 GN=SMC3 PE=1 SV=2	0.005	1.619	1	1	1	1	1	1217	141.5	0	1
High	A0A0A0MRZ8	Immunoglobulin kappa variable 3D-11 OS=Homo sapiens OX=9606 GN=IGKV3D-11 PE=3 SV=6	0.005	1.618	8	1	3	1	1	115	12.6	0	1
High	S4R3N7	Chromosome 10 open reading frame 90 OS=Homo sapiens OX=9606 GN=C10orf90 PE=1 SV=3	0.005	1.611	1	1	1	1	1	796	89.1	1.66	1
High	Q8N565	Melanoregulin OS=Homo sapiens OX=9606 GN=MREG PE=1 SV=1	0.008	1.588	4	1	1	1	1	214	24.9	0	1
High	Q9UBX7	Kallikrein-11 OS=Homo sapiens OX=9606 GN=KLK11 PE=1 SV=2	0.008	1.554	2	1	2	1	1	282	31	3.81	1
High	U3KQK0	Histone H2B OS=Homo sapiens OX=9606 GN=H2BC15 PE=1 SV=1	0.008	1.543	9	1	2	1	1	166	18.8	1.73	1
Medium	O14960	Leukocyte cell-derived chemotaxin-2 OS=Homo sapiens OX=9606 GN=LECT2 PE=1 SV=2	0.014	1.474	5	1	2	1	1	151	16.4	0	1
Medium	Q16270	Insulin-like growth factor-binding protein 7 OS=Homo sapiens OX=9606 GN=IGFBP7 PE=1 SV=1	0.017	1.396	6	1	1	1	1	282	29.1	0	1
Medium	P08493	Matrix Gla protein OS=Homo sapiens OX=9606 GN=MGP PE=1 SV=2	0.017	1.388	11	1	2	1	1	103	12.3	0	1
Medium	A0A499FJD3	GATOR complex protein WDR24 OS=Homo sapiens OX=9606 GN=WDR24 PE=1 SV=1	0.021	1.354	2	1	4	1	1	920	101.9	0	1
Medium	A0A7I2V4I5	Zinc finger CCCH-type containing 13 OS=Homo sapiens OX=9606 GN=ZC3H13 PE=1 SV=1	0.021	1.348	1	1	1	1	1	1669	196.6	0	1
Medium	A0A494C1Q1	C-C motif chemokine ligand 5 OS=Homo sapiens OX=9606 GN=CCL5 PE=1 SV=1	0.021	1.344	5	1	1	1	1	154	17	0	1

## Sheet: SP3 hydrophilic nanoparticles
Protein FDR Confidence: Combined	Accession	Description	Exp. q-value: Combined	Sum PEP Score	Coverage [%]	# Peptides	# PSMs	# Unique Peptides	# Protein Groups	# AAs	MW [kDa]	Score Sequest HT: Sequest HT	# Peptides (by Search Engine): Sequest HT
High	P04114	Apolipoprotein B-100 OS=Homo sapiens OX=9606 GN=APOB PE=1 SV=2	0	589.293	32	125	698	125	1	4563	515.3	1420.42	125
High	P01024	Complement C3 OS=Homo sapiens OX=9606 GN=C3 PE=1 SV=2	0	231.703	36	46	323	41	1	1663	187	753.54	46
High	P01042	Kininogen-1 OS=Homo sapiens OX=9606 GN=KNG1 PE=1 SV=2	0	154.687	38	29	977	29	1	644	71.9	2273.02	29
High	P02649	Apolipoprotein E OS=Homo sapiens OX=9606 GN=APOE PE=1 SV=1	0	103.835	65	22	241	22	1	317	36.1	611.81	22
High	P02647	Apolipoprotein A-I OS=Homo sapiens OX=9606 GN=APOA1 PE=1 SV=1	0	102.166	74	24	280	24	1	267	30.8	602.17	24
High	P19823	Inter-alpha-trypsin inhibitor heavy chain H2 OS=Homo sapiens OX=9606 GN=ITIH2 PE=1 SV=2	0	97.233	28	23	175	23	1	946	106.4	386.35	23
High	A0A8Q3SIA1	Sushi domain-containing protein OS=Homo sapiens OX=9606 PE=4 SV=1	0	91.651	16	20	235	17	1	1504	169.8	459.45	20
High	P02768	Albumin OS=Homo sapiens OX=9606 GN=ALB PE=1 SV=2	0	79.649	30	21	355	21	1	609	69.3	689.01	21
High	P19827	Inter-alpha-trypsin inhibitor heavy chain H1 OS=Homo sapiens OX=9606 GN=ITIH1 PE=1 SV=3	0	74.606	23	16	72	16	1	911	101.3	140.39	16
High	P04196	Histidine-rich glycoprotein OS=Homo sapiens OX=9606 GN=HRG PE=1 SV=1	0	67.049	27	13	191	13	1	525	59.5	494.89	13
High	A0A0A0MRJ7	Coagulation factor V OS=Homo sapiens OX=9606 GN=F5 PE=1 SV=1	0	66.433	9	17	84	17	1	2229	252.1	99.31	17
High	P01834	Immunoglobulin kappa constant OS=Homo sapiens OX=9606 GN=IGKC PE=1 SV=2	0	62.384	53	6	86	6	1	107	11.8	285.8	6
High	P02787	Serotransferrin OS=Homo sapiens OX=9606 GN=TF PE=1 SV=4	0	54.509	17	12	36	12	1	698	77	53.79	12
High	P01857	Immunoglobulin heavy constant gamma 1 OS=Homo sapiens OX=9606 GN=IGHG1 PE=1 SV=2	0	53.657	32	10	119	5	1	399	43.9	203.86	10
High	H0YAC1	Uncharacterized protein (Fragment) OS=Homo sapiens OX=9606 PE=3 SV=1	0	49.892	18	12	93	12	1	686	76.8	167.36	12
High	P03951	Coagulation factor XI OS=Homo sapiens OX=9606 GN=F11 PE=1 SV=1	0	48.929	19	11	146	11	1	625	70.1	291.74	11
High	Q92954	Proteoglycan 4 OS=Homo sapiens OX=9606 GN=PRG4 PE=1 SV=3	0	48.897	9	12	81	12	1	1404	151	153.37	12
High	P04004	Vitronectin OS=Homo sapiens OX=9606 GN=VTN PE=1 SV=1	0	48.692	18	8	212	8	1	478	54.3	539.62	8
High	P01871	Immunoglobulin heavy constant mu OS=Homo sapiens OX=9606 GN=IGHM PE=1 SV=5	0	48.127	20	10	149	10	1	474	51.9	274.91	10
High	A0A024R6N5	Alpha-1-antitrypsin OS=Homo sapiens OX=9606 GN=SERPINA1 PE=1 SV=1	0	47.506	29	10	38	10	1	418	46.7	86.15	10
High	P02745	Complement C1q subcomponent subunit A OS=Homo sapiens OX=9606 GN=C1QA PE=1 SV=2	0	45.165	37	6	339	6	1	245	26	1201.9	6
High	P02675	Fibrinogen beta chain OS=Homo sapiens OX=9606 GN=FGB PE=1 SV=2	0	43.556	29	12	19	12	1	491	55.9	30.59	12
High	B0YIW2	Apolipoprotein C-III OS=Homo sapiens OX=9606 GN=APOC3 PE=1 SV=1	0	41.488	35	6	70	6	1	117	12.8	186.42	6
High	P10909	Clusterin OS=Homo sapiens OX=9606 GN=CLU PE=1 SV=1	0	40.035	22	9	72	9	1	449	52.5	142.55	9
High	Q03591	Complement factor H-related protein 1 OS=Homo sapiens OX=9606 GN=CFHR1 PE=1 SV=2	0	38.44	26	7	85	3	1	330	37.6	166.13	7
High	Q14520	Hyaluronan-binding protein 2 OS=Homo sapiens OX=9606 GN=HABP2 PE=1 SV=1	0	32.763	15	9	46	9	1	560	62.6	62.47	9
High	A0A0G2JPR0	Complement C4-A OS=Homo sapiens OX=9606 GN=C4A PE=1 SV=1	0	31.316	6	7	31	7	1	1744	192.8	65.77	7
High	P02788	Lactotransferrin OS=Homo sapiens OX=9606 GN=LTF PE=1 SV=6	0	30.91	13	7	18	7	1	710	78.1	22.31	7
High	A0A8Q3WM25	Complement C1q B chain OS=Homo sapiens OX=9606 GN=C1QB PE=1 SV=1	0	30.295	23	5	86	5	1	277	29.3	198.11	5
High	P01023	Alpha-2-macroglobulin OS=Homo sapiens OX=9606 GN=A2M PE=1 SV=3	0	29.491	5	5	14	5	1	1474	163.2	27.15	5
High	P02747	Complement C1q subcomponent subunit C OS=Homo sapiens OX=9606 GN=C1QC PE=1 SV=3	0	28.945	22	5	91	5	1	245	25.8	307.98	5
High	P02671	Fibrinogen alpha chain OS=Homo sapiens OX=9606 GN=FGA PE=1 SV=2	0	28.859	11	7	20	7	1	866	94.9	28.96	7
High	A0A0B4J231	Immunoglobulin lambda like polypeptide 5 OS=Homo sapiens OX=9606 GN=IGLL5 PE=1 SV=1	0	28.465	24	4	39	3	1	215	23.1	109.49	4
High	P05452	Tetranectin OS=Homo sapiens OX=9606 GN=CLEC3B PE=1 SV=3	0	27.021	25	2	21	2	1	202	22.5	78.4	2
High	A0A9H4DHQ2	Immunoglobulin heavy constant gamma 3 (G3m marker) (Fragment) OS=Homo sapiens OX=9606 GN=IGHG3 PE=1 SV=1	0	26.74	17	7	55	2	1	446	49.1	41.27	7
High	C9JC84	Fibrinogen gamma chain OS=Homo sapiens OX=9606 GN=FGG PE=1 SV=1	0	26.267	19	6	22	6	1	461	52.3	25.59	6
High	P0DOY2	Immunoglobulin lambda constant 2 OS=Homo sapiens OX=9606 GN=IGLC2 PE=1 SV=1	0	25.993	42	3	59	2	1	106	11.3	156.89	3
High	Q9BWP8	Collectin-11 OS=Homo sapiens OX=9606 GN=COLEC11 PE=1 SV=1	0	24.774	24	5	27	5	1	271	28.6	62.86	5
High	P00738	Haptoglobin OS=Homo sapiens OX=9606 GN=HP PE=1 SV=1	0	24.315	18	8	22	4	1	406	45.2	43.7	8
High	A0A8Q3SI22	Complement C3 (Fragment) OS=Homo sapiens OX=9606 GN=C3 PE=1 SV=1	0	23.2	46	6	30	1	1	198	21.8	56.02	6
High	K7ER74	Apolipoprotein C-II OS=Homo sapiens OX=9606 GN=APOC4-APOC2 PE=1 SV=1	0	21.174	31	5	67	5	1	178	20	137.79	5
High	E9PGN7	Serpin family G member 1 OS=Homo sapiens OX=9606 GN=SERPING1 PE=1 SV=1	0	20.923	12	6	25	6	1	543	59.5	32.6	6
High	P01876	Immunoglobulin heavy constant alpha 1 OS=Homo sapiens OX=9606 GN=IGHA1 PE=1 SV=3	0	18.284	15	5	17	5	1	398	42.8	31.43	5
High	P61626	Lysozyme C OS=Homo sapiens OX=9606 GN=LYZ PE=1 SV=1	0	14.785	30	5	21	5	1	148	16.5	39.23	5
High	P18428	Lipopolysaccharide-binding protein OS=Homo sapiens OX=9606 GN=LBP PE=1 SV=3	0	14.643	10	4	24	4	1	481	53.4	39.45	4
High	P00739	Haptoglobin-related protein OS=Homo sapiens OX=9606 GN=HPR PE=2 SV=2	0	14.326	16	5	7	1	1	348	39	13.15	5
High	Q15485	Ficolin-2 OS=Homo sapiens OX=9606 GN=FCN2 PE=1 SV=2	0	12.901	16	4	15	4	1	313	34	13.26	4
High	P24593	Insulin-like growth factor-binding protein 5 OS=Homo sapiens OX=9606 GN=IGFBP5 PE=1 SV=1	0	12.163	7	3	4	3	1	272	30.6	9.82	3
High	Q9BXR6	Complement factor H-related protein 5 OS=Homo sapiens OX=9606 GN=CFHR5 PE=1 SV=1	0	11.993	7	4	13	3	1	569	64.4	11.96	4
High	A0A8I5KWT8	Myosin heavy chain 9 OS=Homo sapiens OX=9606 GN=MYH9 PE=1 SV=1	0	11.877	2	2	2	2	1	1981	229	4.59	2
High	A0A4W8ZXM2	Immunoglobulin heavy variable 3-72 OS=Homo sapiens OX=9606 GN=IGHV3-72 PE=4 SV=1	0	11.679	19	1	5	1	1	101	11.2	11.33	1
High	P08519	Apolipoprotein(a) OS=Homo sapiens OX=9606 GN=LPA PE=1 SV=2	0	10.997	6	4	12	4	1	2040	226.4	13.32	4
High	P03950	Angiogenin OS=Homo sapiens OX=9606 GN=ANG PE=1 SV=1	0	9.906	18	2	11	2	1	147	16.5	13.66	2
High	V9GYM3	Apolipoprotein A-II OS=Homo sapiens OX=9606 GN=APOA2 PE=1 SV=1	0	9.718	25	3	27	3	1	133	14.9	53.13	3
High	P26038	Moesin OS=Homo sapiens OX=9606 GN=MSN PE=1 SV=3	0	9.419	8	4	8	4	1	577	67.8	2.15	4
High	P05154	Plasma serine protease inhibitor OS=Homo sapiens OX=9606 GN=SERPINA5 PE=1 SV=3	0	9.419	9	3	4	3	1	406	45.6	5.66	3
High	P17936	Insulin-like growth factor-binding protein 3 OS=Homo sapiens OX=9606 GN=IGFBP3 PE=1 SV=2	0	9.059	6	2	18	2	1	291	31.7	34.12	2
High	P35527	Keratin, type I cytoskeletal 9 OS=Homo sapiens OX=9606 GN=KRT9 PE=1 SV=3	0	8.961	4	1	1	1	1	623	62	3.82	1
High	P27169	Serum paraoxonase/arylesterase 1 OS=Homo sapiens OX=9606 GN=PON1 PE=1 SV=3	0	8.78	5	1	5	1	1	355	39.7	12.31	1
High	P01011	Alpha-1-antichymotrypsin OS=Homo sapiens OX=9606 GN=SERPINA3 PE=1 SV=2	0	8.693	4	1	2	1	1	423	47.6	5.63	1
High	Q15113	Procollagen C-endopeptidase enhancer 1 OS=Homo sapiens OX=9606 GN=PCOLCE PE=1 SV=2	0	8.684	7	2	6	2	1	449	47.9	10.04	2
High	P06727	Apolipoprotein A-IV OS=Homo sapiens OX=9606 GN=APOA4 PE=1 SV=4	0	8.628	9	3	4	3	1	396	45.3	6.79	3
High	A0A096LPE2	SAA2-SAA4 readthrough OS=Homo sapiens OX=9606 GN=SAA2-SAA4 PE=3 SV=1	0	8.375	19	3	9	3	1	208	23.3	4.27	3
High	P49908	Selenoprotein P OS=Homo sapiens OX=9606 GN=SELENOP PE=1 SV=3	0	8.329	6	2	4	2	1	381	43.2	7.74	2
High	E7EQ64	Serine protease 1 OS=Homo sapiens OX=9606 GN=PRSS1 PE=1 SV=1	0	8.007	7	2	46	2	1	261	28.1	76.76	2
High	P00748	Coagulation factor XII OS=Homo sapiens OX=9606 GN=F12 PE=1 SV=3	0	7.921	4	2	12	2	1	615	67.7	17.45	2
High	P02751	Fibronectin OS=Homo sapiens OX=9606 GN=FN1 PE=1 SV=5	0	7.903	2	3	3	3	1	2477	272.2	0	3
High	P07358	Complement component C8 beta chain OS=Homo sapiens OX=9606 GN=C8B PE=1 SV=4	0	7.804	4	2	5	2	1	591	66.9	8.03	2
High	P02654	Apolipoprotein C-I OS=Homo sapiens OX=9606 GN=APOC1 PE=1 SV=1	0	7.615	24	3	10	3	1	83	9.3	14.31	3
High	P04264	Keratin, type II cytoskeletal 1 OS=Homo sapiens OX=9606 GN=KRT1 PE=1 SV=6	0	7.448	4	2	2	2	1	644	66	4.76	2
High	C9JV77	Alpha-2-HS-glycoprotein OS=Homo sapiens OX=9606 GN=AHSG PE=1 SV=1	0	6.742	8	2	5	2	1	368	39.4	6.35	2
High	A0A8I5KW61	C-X-C motif chemokine OS=Homo sapiens OX=9606 PE=3 SV=1	0	6.618	9	2	33	2	1	193	21.1	63.25	2
High	P02760	Protein AMBP OS=Homo sapiens OX=9606 GN=AMBP PE=1 SV=1	0	6.371	7	1	3	1	1	352	39	6.7	1
High	P04003	C4b-binding protein alpha chain OS=Homo sapiens OX=9606 GN=C4BPA PE=1 SV=2	0	6.143	3	2	4	2	1	597	67	4.83	2
High	B4E1Z4	Complement C2 OS=Homo sapiens OX=9606 PE=1 SV=1	0	5.731	1	1	2	1	1	1266	140.9	3.06	1
High	P08697	Alpha-2-antiplasmin OS=Homo sapiens OX=9606 GN=SERPINF2 PE=1 SV=3	0	5.654	7	2	6	2	1	491	54.5	13.91	2
High	O00391	Sulfhydryl oxidase 1 OS=Homo sapiens OX=9606 GN=QSOX1 PE=1 SV=3	0	5.362	3	2	2	2	1	747	82.5	1.93	2
High	P34096	Ribonuclease 4 OS=Homo sapiens OX=9606 GN=RNASE4 PE=1 SV=3	0	4.966	9	1	4	1	1	147	16.8	2.74	1
High	B7ZKJ8	ITIH4 protein OS=Homo sapiens OX=9606 GN=ITIH4 PE=1 SV=1	0	4.843	2	2	4	2	1	935	103.8	0	2
High	P04217	Alpha-1B-glycoprotein OS=Homo sapiens OX=9606 GN=A1BG PE=1 SV=4	0	4.454	4	2	3	2	1	495	54.2	4.53	2
High	P01008	Antithrombin-III OS=Homo sapiens OX=9606 GN=SERPINC1 PE=1 SV=1	0	4.419	5	1	2	1	1	464	52.6	5.36	1
High	P05164	Myeloperoxidase OS=Homo sapiens OX=9606 GN=MPO PE=1 SV=1	0	4.312	3	1	1	1	1	745	83.8	2.62	1
High	P01591	Immunoglobulin J chain OS=Homo sapiens OX=9606 GN=JCHAIN PE=1 SV=4	0	4.231	8	1	8	1	1	159	18.1	7.54	1
High	Q9Y6Z7	Collectin-10 OS=Homo sapiens OX=9606 GN=COLEC10 PE=1 SV=2	0.007	3.605	4	1	1	1	1	277	30.7	2.45	1
High	A0A1B0GVI3	Keratin 10 OS=Homo sapiens OX=9606 GN=KRT10 PE=1 SV=2	0.007	3.259	4	1	3	1	1	624	63.3	0	1
High	B1AH94	Apolipoprotein L1 OS=Homo sapiens OX=9606 GN=APOL1 PE=1 SV=2	0.007	3.077	4	1	2	1	1	427	47.4	0	1
High	P48061	Stromal cell-derived factor 1 OS=Homo sapiens OX=9606 GN=CXCL12 PE=1 SV=1	0.007	2.933	9	1	1	1	1	93	10.7	2.09	1
High	U3KQK0	Histone H2B OS=Homo sapiens OX=9606 GN=H2BC15 PE=1 SV=1	0.006	2.85	7	1	2	1	1	166	18.8	0	1
High	P01619	Immunoglobulin kappa variable 3-20 OS=Homo sapiens OX=9606 GN=IGKV3-20 PE=1 SV=2	0.006	2.817	8	1	2	1	1	116	12.5	4.32	1
High	P21333	Filamin-A OS=Homo sapiens OX=9606 GN=FLNA PE=1 SV=4	0.006	2.686	1	1	2	1	1	2647	280.6	0	1
High	A0A0A0MTH3	Integrin-linked protein kinase OS=Homo sapiens OX=9606 GN=ILK PE=1 SV=1	0.006	2.556	2	1	2	1	1	483	54.6	0	1
High	A0A8Q3WL79	Complement C8 alpha chain OS=Homo sapiens OX=9606 GN=C8A PE=1 SV=1	0.006	2.514	2	1	1	1	1	584	65	2.53	1
High	P55056	Apolipoprotein C-IV OS=Homo sapiens OX=9606 GN=APOC4 PE=1 SV=1	0.006	2.453	9	1	2	1	1	127	14.5	0	1
High	P00734	Prothrombin OS=Homo sapiens OX=9606 GN=F2 PE=1 SV=2	0.006	2.419	1	1	1	1	1	622	70	0	1
High	P01709	Immunoglobulin lambda variable 2-8 OS=Homo sapiens OX=9606 GN=IGLV2-8 PE=1 SV=2	0.006	2.394	7	1	5	1	1	118	12.4	3.61	1
High	A0A8Q3SID6	Complement C5 OS=Homo sapiens OX=9606 GN=C5 PE=4 SV=1	0.006	2.371	0	1	1	1	1	1682	188.5	2.03	1
Medium	P00450	Ceruloplasmin OS=Homo sapiens OX=9606 GN=CP PE=1 SV=1	0.011	2.293	1	1	2	1	1	1065	122.1	0	1
Medium	Q99969	Retinoic acid receptor responder protein 2 OS=Homo sapiens OX=9606 GN=RARRES2 PE=1 SV=1	0.011	2.225	6	1	2	1	1	163	18.6	0	1
Medium	P02790	Hemopexin OS=Homo sapiens OX=9606 GN=HPX PE=1 SV=2	0.022	2.142	2	1	2	1	1	462	51.6	4.23	1
Medium	P01706	Immunoglobulin lambda variable 2-11 OS=Homo sapiens OX=9606 GN=IGLV2-11 PE=1 SV=2	0.022	2.131	7	1	1	1	1	119	12.6	1.61	1
Medium	K7ERG9	Complement factor D OS=Homo sapiens OX=9606 GN=CFD PE=1 SV=1	0.022	2.122	7	1	1	1	1	260	27.8	0	1
Medium	Q9Y490	Talin-1 OS=Homo sapiens OX=9606 GN=TLN1 PE=1 SV=3	0.024	2.097	1	1	1	1	1	2541	269.6	0	1
Low	A0A494C1Q1	C-C motif chemokine ligand 5 OS=Homo sapiens OX=9606 GN=CCL5 PE=1 SV=1	0.072	2.017	5	1	2	1	1	154	17	0	1
Low	Q8NI99	Angiopoietin-related protein 6 OS=Homo sapiens OX=9606 GN=ANGPTL6 PE=1 SV=1	0.074	2.011	3	1	1	1	1	470	51.7	1.92	1

## Sheet: SP3 hydrophobic nanoparticles
Protein FDR Confidence: Combined	Accession	Description	Exp. q-value: Combined	Sum PEP Score	Coverage [%]	# Peptides	# PSMs	# Unique Peptides	# Protein Groups	# AAs	MW [kDa]	Score Sequest HT: Sequest HT	# Peptides (by Search Engine): Sequest HT
High	P04114	Apolipoprotein B-100 OS=Homo sapiens OX=9606 GN=APOB PE=1 SV=2	0	658.987	39	160	734	160	1	4563	515.3	1359.08	160
High	P01024	Complement C3 OS=Homo sapiens OX=9606 GN=C3 PE=1 SV=2	0	452.895	58	88	735	78	1	1663	187	1694.65	88
High	P01042	Kininogen-1 OS=Homo sapiens OX=9606 GN=KNG1 PE=1 SV=2	0	145.024	40	34	760	34	1	644	71.9	1408.91	34
High	A0A8Q3SIA1	Sushi domain-containing protein OS=Homo sapiens OX=9606 PE=4 SV=1	0	142.048	25	33	341	30	1	1504	169.8	717.23	33
High	P02649	Apolipoprotein E OS=Homo sapiens OX=9606 GN=APOE PE=1 SV=1	0	135.537	73	28	304	28	1	317	36.1	660.78	28
High	P19823	Inter-alpha-trypsin inhibitor heavy chain H2 OS=Homo sapiens OX=9606 GN=ITIH2 PE=1 SV=2	0	115.699	31	27	173	27	1	946	106.4	315.79	27
High	P19827	Inter-alpha-trypsin inhibitor heavy chain H1 OS=Homo sapiens OX=9606 GN=ITIH1 PE=1 SV=3	0	101.205	29	21	127	21	1	911	101.3	248.82	21
High	P04275	von Willebrand factor OS=Homo sapiens OX=9606 GN=VWF PE=1 SV=4	0	92.816	9	19	82	19	1	2813	309.1	181.19	19
High	P02647	Apolipoprotein A-I OS=Homo sapiens OX=9606 GN=APOA1 PE=1 SV=1	0	91.361	72	23	254	23	1	267	30.8	512.8	23
High	A0A0A0MRJ7	Coagulation factor V OS=Homo sapiens OX=9606 GN=F5 PE=1 SV=1	0	86.592	13	26	109	26	1	2229	252.1	136.55	26
High	A0A8Q3SI22	Complement C3 (Fragment) OS=Homo sapiens OX=9606 GN=C3 PE=1 SV=1	0	85.357	72	12	92	2	1	198	21.8	247.99	12
High	P02671	Fibrinogen alpha chain OS=Homo sapiens OX=9606 GN=FGA PE=1 SV=2	0	77.847	30	21	79	21	1	866	94.9	125.04	21
High	P02768	Albumin OS=Homo sapiens OX=9606 GN=ALB PE=1 SV=2	0	72.601	31	21	198	21	1	609	69.3	327.38	21
High	A0A140TA29	Complement C4-B OS=Homo sapiens OX=9606 GN=C4B PE=1 SV=1	0	71.904	19	22	64	22	1	1698	187.5	110.77	22
High	P02745	Complement C1q subcomponent subunit A OS=Homo sapiens OX=9606 GN=C1QA PE=1 SV=2	0	69.033	41	9	332	9	1	245	26	1090.17	9
High	P02675	Fibrinogen beta chain OS=Homo sapiens OX=9606 GN=FGB PE=1 SV=2	0	67.584	35	16	41	16	1	491	55.9	66.76	16
High	P01857	Immunoglobulin heavy constant gamma 1 OS=Homo sapiens OX=9606 GN=IGHG1 PE=1 SV=2	0	66.535	34	11	151	4	1	399	43.9	297.94	11
High	P01871	Immunoglobulin heavy constant mu OS=Homo sapiens OX=9606 GN=IGHM PE=1 SV=5	0	65.731	30	15	170	15	1	474	51.9	314.34	15
High	Q92954	Proteoglycan 4 OS=Homo sapiens OX=9606 GN=PRG4 PE=1 SV=3	0	65.05	12	17	96	17	1	1404	151	151.09	17
High	A0A024R6N5	Alpha-1-antitrypsin OS=Homo sapiens OX=9606 GN=SERPINA1 PE=1 SV=1	0	63.406	44	16	59	16	1	418	46.7	153.3	16
High	P04196	Histidine-rich glycoprotein OS=Homo sapiens OX=9606 GN=HRG PE=1 SV=1	0	60.751	24	12	150	12	1	525	59.5	340.52	12
High	P01834	Immunoglobulin kappa constant OS=Homo sapiens OX=9606 GN=IGKC PE=1 SV=2	0	57.373	52	5	113	5	1	107	11.8	326.51	5
High	P04004	Vitronectin OS=Homo sapiens OX=9606 GN=VTN PE=1 SV=1	0	55.314	28	14	255	14	1	478	54.3	596.01	14
High	P03951	Coagulation factor XI OS=Homo sapiens OX=9606 GN=F11 PE=1 SV=1	0	54.175	24	14	183	14	1	625	70.1	467.58	14
High	P10909	Clusterin OS=Homo sapiens OX=9606 GN=CLU PE=1 SV=1	0	49.001	31	14	95	14	1	449	52.5	150.53	14
High	P02751	Fibronectin OS=Homo sapiens OX=9606 GN=FN1 PE=1 SV=5	0	44.509	7	11	23	11	1	2477	272.2	48.71	11
High	Q14520	Hyaluronan-binding protein 2 OS=Homo sapiens OX=9606 GN=HABP2 PE=1 SV=1	0	43.282	18	14	83	14	1	560	62.6	108.35	14
High	H0YAC1	Uncharacterized protein (Fragment) OS=Homo sapiens OX=9606 PE=3 SV=1	0	39.812	16	12	83	12	1	686	76.8	129.7	12
High	A0A0B4J231	Immunoglobulin lambda like polypeptide 5 OS=Homo sapiens OX=9606 GN=IGLL5 PE=1 SV=1	0	39.405	33	6	49	3	1	215	23.1	133.58	6
High	P18428	Lipopolysaccharide-binding protein OS=Homo sapiens OX=9606 GN=LBP PE=1 SV=3	0	38.539	23	8	49	8	1	481	53.4	112.07	8
High	A0A8Q3WM25	Complement C1q B chain OS=Homo sapiens OX=9606 GN=C1QB PE=1 SV=1	0	37.809	33	9	122	9	1	277	29.3	286.14	9
High	B0YIW2	Apolipoprotein C-III OS=Homo sapiens OX=9606 GN=APOC3 PE=1 SV=1	0	36.709	51	6	67	6	1	117	12.8	186.61	6
High	C9JC84	Fibrinogen gamma chain OS=Homo sapiens OX=9606 GN=FGG PE=1 SV=1	0	35.827	24	8	37	8	1	461	52.3	43.94	8
High	P0DOY2	Immunoglobulin lambda constant 2 OS=Homo sapiens OX=9606 GN=IGLC2 PE=1 SV=1	0	35.66	60	5	86	2	1	106	11.3	223.88	5
High	P02787	Serotransferrin OS=Homo sapiens OX=9606 GN=TF PE=1 SV=4	0	34.666	13	8	23	8	1	698	77	28.37	8
High	P05155	Plasma protease C1 inhibitor OS=Homo sapiens OX=9606 GN=SERPING1 PE=1 SV=2	0	32.552	19	9	28	9	1	500	55.1	38.74	9
High	P00738	Haptoglobin OS=Homo sapiens OX=9606 GN=HP PE=1 SV=1	0	31.547	22	9	30	5	1	406	45.2	44.15	9
High	P01876	Immunoglobulin heavy constant alpha 1 OS=Homo sapiens OX=9606 GN=IGHA1 PE=1 SV=3	0	31.222	24	7	25	7	1	398	42.8	45.2	7
High	P02788	Lactotransferrin OS=Homo sapiens OX=9606 GN=LTF PE=1 SV=6	0	31.219	14	8	21	8	1	710	78.1	30.18	8
High	P60709	Actin, cytoplasmic 1 OS=Homo sapiens OX=9606 GN=ACTB PE=1 SV=1	0	30.961	26	7	16	7	1	375	41.7	29.76	7
High	A0A9H4DHQ2	Immunoglobulin heavy constant gamma 3 (G3m marker) (Fragment) OS=Homo sapiens OX=9606 GN=IGHG3 PE=1 SV=1	0	29.879	19	8	79	1	1	446	49.1	108.48	8
High	P01023	Alpha-2-macroglobulin OS=Homo sapiens OX=9606 GN=A2M PE=1 SV=3	0	29.647	9	9	16	9	1	1474	163.2	27.76	9
High	P01861	Immunoglobulin heavy constant gamma 4 OS=Homo sapiens OX=9606 GN=IGHG4 PE=1 SV=2	0	29.52	16	5	67	1	1	396	43.8	146.01	5
High	Q9BWP8	Collectin-11 OS=Homo sapiens OX=9606 GN=COLEC11 PE=1 SV=1	0	29.027	25	6	25	6	1	271	28.6	55.93	6
High	Q03591	Complement factor H-related protein 1 OS=Homo sapiens OX=9606 GN=CFHR1 PE=1 SV=2	0	28.86	26	7	94	3	1	330	37.6	183.83	7
High	P02747	Complement C1q subcomponent subunit C OS=Homo sapiens OX=9606 GN=C1QC PE=1 SV=3	0	26.563	22	5	109	5	1	245	25.8	364.02	5
High	P05154	Plasma serine protease inhibitor OS=Homo sapiens OX=9606 GN=SERPINA5 PE=1 SV=3	0	24.727	23	8	23	8	1	406	45.6	21.86	8
High	P07358	Complement component C8 beta chain OS=Homo sapiens OX=9606 GN=C8B PE=1 SV=4	0	24.436	15	8	39	8	1	591	66.9	64.13	8
High	P00450	Ceruloplasmin OS=Homo sapiens OX=9606 GN=CP PE=1 SV=1	0	24.138	11	8	14	8	1	1065	122.1	13.1	8
High	P21333	Filamin-A OS=Homo sapiens OX=9606 GN=FLNA PE=1 SV=4	0	23.628	6	9	18	9	1	2647	280.6	22.97	9
High	P05452	Tetranectin OS=Homo sapiens OX=9606 GN=CLEC3B PE=1 SV=3	0	22.804	31	3	25	3	1	202	22.5	92.71	3
High	P26038	Moesin OS=Homo sapiens OX=9606 GN=MSN PE=1 SV=3	0	22.098	16	8	15	8	1	577	67.8	12.94	8
High	Q15485	Ficolin-2 OS=Homo sapiens OX=9606 GN=FCN2 PE=1 SV=2	0	21.882	26	7	27	7	1	313	34	38.88	7
High	Q9Y490	Talin-1 OS=Homo sapiens OX=9606 GN=TLN1 PE=1 SV=3	0	21.635	4	5	10	5	1	2541	269.6	20.23	5
High	P01859	Immunoglobulin heavy constant gamma 2 OS=Homo sapiens OX=9606 GN=IGHG2 PE=1 SV=3	0	20.682	24	8	31	4	1	395	43.8	42.1	8
High	K7ER74	Apolipoprotein C-II OS=Homo sapiens OX=9606 GN=APOC4-APOC2 PE=1 SV=1	0	20.313	36	6	70	5	1	178	20	149.35	6
High	O00391	Sulfhydryl oxidase 1 OS=Homo sapiens OX=9606 GN=QSOX1 PE=1 SV=3	0	18.144	13	7	15	7	1	747	82.5	19.58	7
High	P01011	Alpha-1-antichymotrypsin OS=Homo sapiens OX=9606 GN=SERPINA3 PE=1 SV=2	0	18.023	17	5	6	5	1	423	47.6	10.86	5
High	P03950	Angiogenin OS=Homo sapiens OX=9606 GN=ANG PE=1 SV=1	0	17.2	31	4	13	4	1	147	16.5	24.79	4
High	P08697	Alpha-2-antiplasmin OS=Homo sapiens OX=9606 GN=SERPINF2 PE=1 SV=3	0	17.057	14	6	12	6	1	491	54.5	20.46	6
High	P07996	Thrombospondin-1 OS=Homo sapiens OX=9606 GN=THBS1 PE=1 SV=2	0	16.33	7	7	10	7	1	1170	129.3	4.76	7
High	P00748	Coagulation factor XII OS=Homo sapiens OX=9606 GN=F12 PE=1 SV=3	0	15.845	7	5	21	5	1	615	67.7	28.21	5
High	P06727	Apolipoprotein A-IV OS=Homo sapiens OX=9606 GN=APOA4 PE=1 SV=4	0	15.406	20	7	13	7	1	396	45.3	5.15	7
High	P00739	Haptoglobin-related protein OS=Homo sapiens OX=9606 GN=HPR PE=2 SV=2	0	14.868	17	5	9	1	1	348	39	9.59	5
High	K7ERG9	Complement factor D OS=Homo sapiens OX=9606 GN=CFD PE=1 SV=1	0	14.261	26	4	14	4	1	260	27.8	15.37	4
High	P07357	Complement component C8 alpha chain OS=Homo sapiens OX=9606 GN=C8A PE=1 SV=2	0	13.811	9	5	13	5	1	584	65.1	19.12	5
High	B7ZKJ8	ITIH4 protein OS=Homo sapiens OX=9606 GN=ITIH4 PE=1 SV=1	0	13.431	7	7	12	7	1	935	103.8	6.27	7
High	P08519	Apolipoprotein(a) OS=Homo sapiens OX=9606 GN=LPA PE=1 SV=2	0	12.885	7	5	16	5	1	2040	226.4	18.32	5
High	P02760	Protein AMBP OS=Homo sapiens OX=9606 GN=AMBP PE=1 SV=1	0	12.715	18	4	10	4	1	352	39	16.94	4
High	A0A8I5KWT8	Myosin heavy chain 9 OS=Homo sapiens OX=9606 GN=MYH9 PE=1 SV=1	0	12.701	4	6	8	6	1	1981	229	8.62	6
High	P61626	Lysozyme C OS=Homo sapiens OX=9606 GN=LYZ PE=1 SV=1	0	12.422	26	4	25	4	1	148	16.5	41.47	4
High	Q9BXR6	Complement factor H-related protein 5 OS=Homo sapiens OX=9606 GN=CFHR5 PE=1 SV=1	0	12.272	7	4	23	3	1	569	64.4	24.41	4
High	P06396	Gelsolin OS=Homo sapiens OX=9606 GN=GSN PE=1 SV=1	0	10.917	5	2	3	2	1	782	85.6	8.29	2
High	A0A4W8ZXM2	Immunoglobulin heavy variable 3-72 OS=Homo sapiens OX=9606 GN=IGHV3-72 PE=4 SV=1	0	10.901	26	2	8	2	1	101	11.2	12.46	2
High	A6PVI2	Plasminogen OS=Homo sapiens OX=9606 GN=PLG PE=1 SV=2	0	10.839	7	5	8	5	1	827	92.4	2.01	5
High	V9GYM3	Apolipoprotein A-II OS=Homo sapiens OX=9606 GN=APOA2 PE=1 SV=1	0	10.828	26	4	19	4	1	133	14.9	33.07	4
High	A0A096LPE2	SAA2-SAA4 readthrough OS=Homo sapiens OX=9606 GN=SAA2-SAA4 PE=3 SV=1	0	10.667	28	5	17	5	1	208	23.3	6.64	5
High	P07360	Complement component C8 gamma chain OS=Homo sapiens OX=9606 GN=C8G PE=1 SV=3	0	10.384	26	3	6	3	1	202	22.3	3.03	3
High	P15169	Carboxypeptidase N catalytic chain OS=Homo sapiens OX=9606 GN=CPN1 PE=1 SV=1	0	10.147	10	4	9	4	1	458	52.3	8.37	4
High	D6RF35	Vitamin D-binding protein OS=Homo sapiens OX=9606 GN=GC PE=1 SV=1	0	9.808	12	4	6	4	1	476	53	2.93	4
High	Q15113	Procollagen C-endopeptidase enhancer 1 OS=Homo sapiens OX=9606 GN=PCOLCE PE=1 SV=2	0	9.51	11	4	9	4	1	449	47.9	11.79	4
High	P02654	Apolipoprotein C-I OS=Homo sapiens OX=9606 GN=APOC1 PE=1 SV=1	0	9.351	35	4	13	4	1	83	9.3	12.58	4
High	P04003	C4b-binding protein alpha chain OS=Homo sapiens OX=9606 GN=C4BPA PE=1 SV=2	0	8.675	6	3	7	3	1	597	67	4.98	3
High	P68871	Hemoglobin subunit beta OS=Homo sapiens OX=9606 GN=HBB PE=1 SV=2	0	8.258	13	1	2	1	1	147	16	5.73	1
High	P01619	Immunoglobulin kappa variable 3-20 OS=Homo sapiens OX=9606 GN=IGKV3-20 PE=1 SV=2	0	8.177	22	2	5	2	1	116	12.5	5.89	2
High	A0A8I5KW61	C-X-C motif chemokine OS=Homo sapiens OX=9606 PE=3 SV=1	0	8.167	17	3	31	3	1	193	21.1	46.61	3
High	E7EQ64	Serine protease 1 OS=Homo sapiens OX=9606 GN=PRSS1 PE=1 SV=1	0	7.967	7	2	37	2	1	261	28.1	67.98	2
High	P27169	Serum paraoxonase/arylesterase 1 OS=Homo sapiens OX=9606 GN=PON1 PE=1 SV=3	0	7.577	5	1	3	1	1	355	39.7	6.38	1
High	P01591	Immunoglobulin J chain OS=Homo sapiens OX=9606 GN=JCHAIN PE=1 SV=4	0	7.102	12	2	14	2	1	159	18.1	16.95	2
High	P01764	Immunoglobulin heavy variable 3-23 OS=Homo sapiens OX=9606 GN=IGHV3-23 PE=1 SV=2	0	6.959	28	2	4	2	1	117	12.6	6.13	2
High	C9JV77	Alpha-2-HS-glycoprotein OS=Homo sapiens OX=9606 GN=AHSG PE=1 SV=1	0	6.937	8	2	4	2	1	368	39.4	8.07	2
High	P01008	Antithrombin-III OS=Homo sapiens OX=9606 GN=SERPINC1 PE=1 SV=1	0	6.51	5	1	2	1	1	464	52.6	8.42	1
High	P17936	Insulin-like growth factor-binding protein 3 OS=Homo sapiens OX=9606 GN=IGFBP3 PE=1 SV=2	0	6.427	13	3	13	3	1	291	31.7	13.13	3
High	P35527	Keratin, type I cytoskeletal 9 OS=Homo sapiens OX=9606 GN=KRT9 PE=1 SV=3	0	6.406	4	1	1	1	1	623	62	1.87	1
High	A0A0C4DH72	Immunoglobulin kappa variable 1-6 OS=Homo sapiens OX=9606 GN=IGKV1-6 PE=3 SV=1	0	5.953	14	1	2	1	1	117	12.7	3.07	1
High	F5H5D3	Tubulin alpha chain OS=Homo sapiens OX=9606 GN=TUBA1C PE=1 SV=1	0	5.877	4	1	1	1	1	519	57.7	2.9	1
High	P34096	Ribonuclease 4 OS=Homo sapiens OX=9606 GN=RNASE4 PE=1 SV=3	0	5.677	18	2	4	2	1	147	16.8	5.25	2
High	Q8NI99	Angiopoietin-related protein 6 OS=Homo sapiens OX=9606 GN=ANGPTL6 PE=1 SV=1	0	5.315	5	2	3	2	1	470	51.7	4.07	2
High	P55056	Apolipoprotein C-IV OS=Homo sapiens OX=9606 GN=APOC4 PE=1 SV=1	0	5.255	22	3	5	2	1	127	14.5	3.6	3
High	P49908	Selenoprotein P OS=Homo sapiens OX=9606 GN=SELENOP PE=1 SV=3	0	5.012	3	1	4	1	1	381	43.2	7.33	1
High	P04217	Alpha-1B-glycoprotein OS=Homo sapiens OX=9606 GN=A1BG PE=1 SV=4	0	4.521	6	2	5	2	1	495	54.2	6.17	2
High	P02763	Alpha-1-acid glycoprotein 1 OS=Homo sapiens OX=9606 GN=ORM1 PE=1 SV=2	0	4.282	5	2	2	2	1	201	23.5	1.9	2
High	E9PQD6	Serum amyloid A protein OS=Homo sapiens OX=9606 GN=SAA1 PE=1 SV=1	0	4.209	16	1	2	1	1	122	13.5	3.44	1
High	P36955	Pigment epithelium-derived factor OS=Homo sapiens OX=9606 GN=SERPINF1 PE=1 SV=4	0	3.971	6	2	3	2	1	418	46.3	0	2
High	B4DPQ0	Complement C1r OS=Homo sapiens OX=9606 GN=C1R PE=1 SV=1	0	3.669	3	1	1	1	1	719	81.8	2.43	1
High	P08514	Integrin alpha-IIb OS=Homo sapiens OX=9606 GN=ITGA2B PE=1 SV=3	0	3.647	2	2	2	2	1	1039	113.3	1.61	2
High	B7Z6Z4	Myosin light chain 6 OS=Homo sapiens OX=9606 GN=MYL6 PE=1 SV=1	0	3.51	10	2	2	2	1	238	26.7	0	2
High	P02790	Hemopexin OS=Homo sapiens OX=9606 GN=HPX PE=1 SV=2	0	3.472	5	2	5	2	1	462	51.6	6.08	2
High	C9JF17	Apolipoprotein D (Fragment) OS=Homo sapiens OX=9606 GN=APOD PE=1 SV=1	0	3.467	5	1	1	1	1	215	24.1	2.38	1
High	B4E1Z4	Complement C2 OS=Homo sapiens OX=9606 PE=1 SV=1	0	3.13	1	1	1	1	1	1266	140.9	0	1
High	A0A994J439	Inter-alpha-trypsin inhibitor heavy chain 3 OS=Homo sapiens OX=9606 GN=ITIH3 PE=1 SV=1	0	3.086	1	1	1	1	1	927	103.7	0	1
High	Q99969	Retinoic acid receptor responder protein 2 OS=Homo sapiens OX=9606 GN=RARRES2 PE=1 SV=1	0	3.04	6	1	1	1	1	163	18.6	2.71	1
High	Q9Y6Z7	Collectin-10 OS=Homo sapiens OX=9606 GN=COLEC10 PE=1 SV=2	0	2.793	4	1	1	1	1	277	30.7	1.68	1
High	P00734	Prothrombin OS=Homo sapiens OX=9606 GN=F2 PE=1 SV=2	0	2.789	2	2	2	2	1	622	70	0	2
High	P08567	Pleckstrin OS=Homo sapiens OX=9606 GN=PLEK PE=1 SV=3	0	2.506	4	1	2	1	1	350	40.1	0	1
High	A0A8Q3SID6	Complement C5 OS=Homo sapiens OX=9606 GN=C5 PE=4 SV=1	0	2.501	0	1	1	1	1	1682	188.5	2.07	1
High	U3KQK0	Histone H2B OS=Homo sapiens OX=9606 GN=H2BC15 PE=1 SV=1	0	2.306	7	1	1	1	1	166	18.8	2.18	1
High	P01709	Immunoglobulin lambda variable 2-8 OS=Homo sapiens OX=9606 GN=IGLV2-8 PE=1 SV=2	0	2.273	7	1	2	1	1	118	12.4	0	1
High	B1AH94	Apolipoprotein L1 OS=Homo sapiens OX=9606 GN=APOL1 PE=1 SV=2	0.004	2.236	3	1	2	1	1	427	47.4	3.45	1
High	A0A494C1Q1	C-C motif chemokine ligand 5 OS=Homo sapiens OX=9606 GN=CCL5 PE=1 SV=1	0.004	2.158	5	1	2	1	1	154	17	0	1
High	P10412	Histone H1.4 OS=Homo sapiens OX=9606 GN=H1-4 PE=1 SV=2	0.004	2.102	4	1	1	1	1	219	21.9	2.24	1
Medium	P02766	Transthyretin OS=Homo sapiens OX=9606 GN=TTR PE=1 SV=1	0.012	2.003	16	1	1	1	1	147	15.9	2.37	1
Medium	Q9UBX7	Kallikrein-11 OS=Homo sapiens OX=9606 GN=KLK11 PE=1 SV=2	0.012	1.962	2	1	1	1	1	282	31	2.19	1
Medium	Q9H4B7	Tubulin beta-1 chain OS=Homo sapiens OX=9606 GN=TUBB1 PE=1 SV=1	0.012	1.939	2	1	2	1	1	451	50.3	0	1
Medium	P02748	Complement component C9 OS=Homo sapiens OX=9606 GN=C9 PE=1 SV=2	0.012	1.918	2	1	1	1	1	559	63.1	0	1
Medium	A0A0A0MRZ8	Immunoglobulin kappa variable 3D-11 OS=Homo sapiens OX=9606 GN=IGKV3D-11 PE=3 SV=6	0.012	1.824	8	1	3	1	1	115	12.6	2.04	1
Medium	O75636	Ficolin-3 OS=Homo sapiens OX=9606 GN=FCN3 PE=1 SV=2	0.026	1.806	3	1	2	1	1	299	32.9	1.83	1
Medium	A0A0J9YW62	Immunoglobulin V-set domain-containing protein (Fragment) OS=Homo sapiens OX=9606 PE=1 SV=1	0.049	1.653	6	1	1	1	1	118	13.2	1.78	1
Low	P43026	Growth/differentiation factor 5 OS=Homo sapiens OX=9606 GN=GDF5 PE=1 SV=4	0.05	1.551	4	1	1	1	1	501	55.4	0	1
Low	O43866	CD5 antigen-like OS=Homo sapiens OX=9606 GN=CD5L PE=1 SV=1	0.052	1.478	2	1	2	1	1	347	38.1	0	1
Low	P24593	Insulin-like growth factor-binding protein 5 OS=Homo sapiens OX=9606 GN=IGFBP5 PE=1 SV=1	0.052	1.475	3	1	4	1	1	272	30.6	1.69	1
Low	A0A0A0MTS7	Titin OS=Homo sapiens OX=9606 GN=TTN PE=1 SV=1	0.063	1.469	0	1	2	1	1	35991	3992.2	0	1
Low	A0A8Q3WKK6	LIM and senescent cell antigen-like-containing domain protein OS=Homo sapiens OX=9606 GN=LIMS1 PE=1 SV=1	0.062	1.457	2	1	1	1	1	398	45.8	0	1
Low	A0A8V8TP41	FERM domain containing kindlin 3 OS=Homo sapiens OX=9606 GN=FERMT3 PE=1 SV=1	0.061	1.442	2	1	1	1	1	670	76.1	1.74	1
Low	A0A0B4J1U7	Immunoglobulin heavy variable 6-1 OS=Homo sapiens OX=9606 GN=IGHV6-1 PE=3 SV=1	0.06	1.437	6	1	2	1	1	121	13.5	0	1
Low	Q86UW6	NEDD4-binding protein 2 OS=Homo sapiens OX=9606 GN=N4BP2 PE=1 SV=2	0.06	1.41	0	1	2	1	1	1770	198.7	0	1
Low	A0A0A0MTH3	Integrin-linked protein kinase OS=Homo sapiens OX=9606 GN=ILK PE=1 SV=1	0.059	1.364	2	1	2	1	1	483	54.6	0	1
Low	P05106	Integrin beta-3 OS=Homo sapiens OX=9606 GN=ITGB3 PE=1 SV=2	0.064	1.351	1	1	1	1	1	788	87	0	1
Low	A0A7P0TB45	Peptidyl-prolyl cis-trans isomerase OS=Homo sapiens OX=9606 GN=PPIB PE=1 SV=1	0.063	1.32	3	1	1	1	1	216	23.8	0	1
Low	H0YBA1	Pericentriolar material 1 OS=Homo sapiens OX=9606 GN=PCM1 PE=1 SV=2	0.062	1.315	0	1	2	1	1	2043	230.5	0	1
