# Supplementary material for: High-throughput plasma/serum proteomics by coupling nanoparticle protein corona-based sample preparation and capillary zone electrophoresis-tandem mass spectrometry
Source: Anal Methods. 2025 Jul 18;17(31):6356–65. doi: 10.1039/d5ay00721f (PMC12305297; doi:10.1039/d5ay00721f)
Supplement: AY-017-D5AY00721F-s002 [file AY-017-D5AY00721F-s002.xlsx]

## Sheet: Note
The lists of identified mouse serum proteins and peptides by CZE-MS/MS under different nanoparticle protein corona-based sample preparation.
The duplicate runs of each sample are combined for joint database searching.
A 1% FDR was used for both peptide-level and protein level to filter the identified proteins after database search using MaxQuant software (Version 2.1.2.0) with the Andromeda search engine against the UniProt proteome database of mouse (UP000000589, 54707 entries, version 02/2024).
12 MS raw files for each nanoparticle were applied for statistical analysis, and iBAQ values were used as the absolute abundance.
All proteins and peptides shown in the table are from mouse serum proteins.

## Sheet: Amine_NPs_proteinGroups
Protein IDs	Protein names	Gene names	Sequence coverage [%]	Unique sequence coverage [%]	Mol. weight [kDa]	Sequence length	Q-value	Score	Sequence coverage BN010 [%]	Sequence coverage BN012 [%]	Sequence coverage BN110 [%]	Sequence coverage KBN002 [%]	Sequence coverage KBN010 [%]	Sequence coverage KBN111 [%]	iBAQ BN010	iBAQ BN012	iBAQ BN110	iBAQ KBN002	iBAQ KBN010	iBAQ KBN111	LFQ intensity BN010	LFQ intensity BN012	LFQ intensity BN110	LFQ intensity KBN002	LFQ intensity KBN010	LFQ intensity KBN111
A0A075B5J6	Ig kappa chain V-II region 2S1.3	Gm20730	10.9	10.9	13.072	119	0.0020964	3.2422	0	0	0	10.9	0	10.9	0	0	0	7942600	0	170670000	0	0	0	0	0	0
A0A075B5J9		Igkv17-127;Igkv17-121	14.2	14.2	12.33	113	0	7.0144	14.2	14.2	14.2	14.2	14.2	14.2	258630000	443350000	904530000	4017699999.9999995	360360000	1446300000	0	0	0	0	0	0
A0A075B5K0		Igkv14-126	36.8	23.9	13.058	117	0	46.813	36.8	36.8	36.8	36.8	26.5	36.8	163840000	64911000	75464000	520690000	595170000	655140000	284540000	252510000	233040000	1018099999.9999999	982340000	1476599999.9999998
A0A0G2JEK4	Ig kappa chain V-V region J606	Igkv11-125	13.7	13.7	12.867	117	0	4.4067	13.7	0	0	0	13.7	0	49072000	0	0	0	9036800	0	0	0	0	0	0	0
A0A075B5K2		Igkv9-124	55.8	55.8	10.419	95	0	323.31	55.8	55.8	33.7	33.7	18.9	18.9	118690000	18194000	464670000	3828999999.9999995	1187800000	686660000	3284399999.9999995	1843799999.9999998	1093100000	6393699999.999999	2891600000	1968899999.9999998
A0A075B5K5	Ig kappa chain V-II region MOPC 511;Ig kappa chain V-II region VKappa167	Igkv2-112;Gm5153	13.4	13.4	13.223	119	0	9.618	13.4	0	0	0	13.4	0	11249000	0	0	0	74838000	0	0	0	0	0	0	0
A0A075B5K6	Ig kappa chain V-II region 17S29.1	Igkv2-109	10.8	10.8	13.057	120	0	8.9243	10.8	10.8	10.8	10.8	10.8	10.8	31140000	37179000	35703000	79732000	136540000	214560000	0	0	0	0	0	0
A0A075B5K7		Igkv14-100	13.8	13.8	12.65	116	0.0039841	2.7994	13.8	13.8	0	13.8	0	0	20824000	55004000	0	71078000	0	0	0	0	0	0	0	0
A0A075B5K9		Igkv12-98	24.6	24.6	12.345	114	0	5.7608	24.6	24.6	24.6	16.7	7.9	0	16324000	27733000	9049700	29787000	20821000	0	44252000	86183000	38688000	97755000	0	0
A0A075B5L2		Igkv4-91	13.4	13.4	12.724	119	0	3.9683	0	0	0	0	13.4	0	0	0	0	0	726790000	0	0	0	0	0	0	0
A0A075B5L3		Igkv4-90	13.7	13.7	12.609	117	0	5.9902	0	0	0	13.7	0	13.7	0	0	0	0	0	0	0	0	0	0	0	0
A0A075B5L4		Igkv12-89	24.3	17.1	11.967	111	0.0021053	3.259	17.1	17.1	17.1	24.3	17.1	24.3	29702000	15583000	16784000	27432000	16736000	5859500	0	0	0	115630000	58176000	0
A0A075B5M1		Igkv4-63	18.9	18.9	10.157	95	0	55.552	18.9	18.9	18.9	18.9	18.9	18.9	6946400	13718000	21005000	737910000	34744000	96182000	0	0	0	0	0	0
A0A075B5M4		Igkv4-57-1	31.9	18.5	12.723	119	0	191.17	13.4	13.4	26.9	31.9	26.9	26.9	88068000	41181000	66662000	848730000	109690000	405670000	174910000	72300000	134210000	1716799999.9999998	284630000	1024399999.9999999
A0A075B5M7		Igkv5-39	47.4	34.7	10.345	95	0	123.51	47.4	47.4	47.4	47.4	47.4	47.4	386570000	573310000	280420000	1238000000	867400000	1512299999.9999998	517870000	723340000	233530000	1464199999.9999998	1110300000	2341300000
A0A075B5M8		Igkv12-38	41.2	41.2	12.428	114	0	125.59	16.7	16.7	29.8	41.2	28.1	41.2	10152000	15714000	41510000	399640000	47451000	1316800000	88671000	0	87377000	580540000	164540000	1741399999.9999998
A0A075B5N3		Igkv8-28	47.5	26.7	10.903	101	0	23.309	38.6	20.8	38.6	20.8	29.7	47.5	70754000	88409000	59743000	29989000	77400000	88538000	161990000	0	224850000	0	220800000	411070000
A0A075B5N4		Igkv8-27	42	18	10.976	100	0	88.506	42	42	42	42	33	42	35876000	42429000	39541000	23052000	115410000	53832000	0	0	0	0	339190000	400600000
A0A075B5N7		Igkv6-13	57.9	41.1	10.44	95	0	121.68	41.1	50.5	41.1	50.5	57.9	50.5	690680000	812150000	565150000	1979799999.9999998	2705200000	2678900000	1067799999.9999999	1281500000	1269900000	2312400000	2995999999.9999995	5067200000
A0A075B5N9		Igkv3-7	55.6	25.3	10.856	99	0	30.734	30.3	30.3	30.3	30.3	55.6	30.3	51046000	36913000	29881000	289210000	421770000	209320000	0	0	0	0	0	0
A0A075B5P1		Igkv3-1	34.5	34.5	12.972	119	0	23.86	0	0	0	34.5	0	0	0	0	0	1291300000	0	0	0	0	0	0	0	0
A0A075B5P3		Ighg2b	38.1	16.7	36.568	336	0	323.31	22.6	19.9	30.4	36	25.6	38.1	1566499999.9999998	1370800000	1087100000	11146000000	6435499999.999999	8522599999.999999	4930800000	5282500000	4263399999.9999995	39558000000	27530000000	38374000000
A0A075B5P4		Ighg1	30.6	15.4	35.633	324	0	123.24	17	20.4	20.4	27.8	20.4	23.1	1047199999.9999999	1008999999.9999999	1243500000	3364699999.9999995	2303400000	3262399999.9999995	3351099999.9999995	3067199999.9999995	2872200000	8772300000	8149499999.999999	11131000000
A0A075B5P5	Ig gamma-3 chain C region	Ighg3	30.9	30.9	36.198	330	0	33.554	27	23.9	21.2	27	24.5	30.9	633440000	571520000	371880000	588180000	258780000	663160000	1948099999.9999998	2123199999.9999998	1563399999.9999998	2088199999.9999998	1346900000	2930799999.9999995
A0A075B6A0	Ig mu chain C region	Ighm	35.1	35.1	52.498	476	0	323.31	28.2	29	32.6	27.3	29	28.8	4375700000	6173499999.999999	3973499999.9999995	4247699999.9999995	3543999999.9999995	3196799999.9999995	13610000000	18118000000	12005000000	12995000000	12365000000	11041000000
A0A075B5P7		Ighv5-2	19	19	13.21	116	0	7.6824	0	0	0	0	0	19	0	0	0	0	0	11061000	0	0	0	0	0	0
A0A075B5P8	Ig heavy chain V region MC101	Ighv2-2;Ighv2-4	19.8	19.8	12.578	116	0	7.4588	0	0	0	0	19.8	0	0	0	0	0	2995800	0	0	0	0	0	0	0
A0A075B5P9		Ighv5-4	28.2	28.2	12.965	117	0	47.834	0	0	27.4	28.2	0	27.4	0	0	39884000	462480000	0	13301000	0	0	69795000	1709599999.9999998	0	231210000
A0A075B5Q0		Ighv5-6	28.2	18.8	12.863	117	0	24.763	28.2	18.8	18.8	28.2	28.2	28.2	127480000	12795000	26115000	567340000	190320000	222400000	411710000	0	0	1244500000	602240000	1228600000
A0A075B5Q3		Ighv2-5	20	20	12.556	115	0	48.032	11.3	8.7	20	0	11.3	20	26718000	31976000	82919000	0	183900000	446970000	0	0	609630000	0	0	821410000
A0A075B5Q5		Ighv2-9	19.8	19.8	12.477	116	0	12.403	0	0	0	0	0	19.8	0	0	0	0	0	11721000	0	0	0	0	0	0
A0A075B5Q6	Ig heavy chain V region 345;Ig heavy chain V region RF	Ighv5-9-1	23.3	13.8	13.067	116	0.0096525	2.5902	23.3	0	13.8	23.3	23.3	23.3	14658000	0	37593000	76749000	23573000	47760000	0	0	0	0	0	0
A0A075B5Q9		Ighv5-15;Ighv5-12	23.3	9.5	12.943	116	0.0021097	3.2655	13.8	13.8	13.8	13.8	13.8	23.3	0	0	0	0	0	35605000	0	0	0	0	0	0
A0A075B5R0		Ighv5-16	42.2	42.2	13.217	116	0	262.48	42.2	23.3	42.2	23.3	42.2	42.2	164250000	143170000	127070000	126130000	467560000	544780000	656850000	321500000	316650000	334920000	1479799999.9999998	1724299999.9999998
A0A075B5R1		Ighv5-17	9.4	9.4	12.905	117	0	5.5971	0	0	0	9.4	9.4	9.4	0	0	0	81105000	58334000	213840000	0	0	0	0	0	0
A0A075B5R2		Ighv7-3	30.8	30.8	13.457	120	0	323.31	30.8	30.8	30.8	30.8	23.3	23.3	185700000	84764000	133580000	64091000	106660000	58350000	234980000	147290000	159750000	109160000	464220000	289500000
A0A075B5R4		Ighv14-1	28.2	11.1	12.991	117	0	4.3801	10.3	28.2	21.4	28.2	28.2	28.2	0	21068000	3486400	222640000	152500000	310540000	0	0	0	0	0	0
A0A075B5R5	Ig heavy chain V region 441;Ig heavy chain V region MOPC 173;Ig heavy chain V region T601;Ig heavy chain V region X44	Ighv4-1	46.6	46.6	12.874	116	0	42.425	27.6	27.6	27.6	40.5	0	40.5	304920000	98563000	109910000	262810000	0	170810000	706110000	200890000	297180000	487230000	0	581230000
A0A075B5R8		Ighv11-2;Ighv11-1	28.2	28.2	13.167	117	0	3.8604	9.4	9.4	0	0	0	28.2	49514000	83490000	0	0	0	45580000	0	0	0	0	0	0
A0A075B5R7		Ighv14-2	24.8	17.9	13.002	117	0	23.411	8.5	15.4	8.5	24.8	15.4	23.1	34707000	26591000	13654000	2838300000	127620000	320970000	0	115470000	0	4191399999.9999995	291530000	399620000
A0A075B5R9		Ighv14-3	24.8	14.5	12.975	117	0	13.691	17.9	17.9	17.9	24.8	17.9	17.9	33355000	21898000	39681000	201160000	29609000	91102000	471150000	462430000	431480000	2145099999.9999998	623600000	1408700000
A0A075B5S1		Ighv9-1	62.2	34.7	11.089	98	0.0020661	3.1046	39.8	20.4	27.6	35.7	20.4	35.7	4720500	0	0	6656800	0	7443700	0	0	0	0	0	0
A0A075B5S2	Ig heavy chain V region M511;Ig heavy chain V region HPCG14;Ig heavy chain V region HPCM6;Ig heavy chain V region H8;Ig heavy chain V regions TEPC 15/S107/HPCM1/HPCM2/HPCM3	Ighv7-1	41.3	41.3	13.644	121	0	56.572	41.3	41.3	41.3	41.3	28.9	41.3	288670000	771320000	266650000	459680000	168990000	215540000	480440000	1162600000	403160000	764480000	442510000	519650000
A0A075B5S3		Ighv14-4	22.5	22.5	12.134	111	0	70.794	22.5	22.5	22.5	22.5	22.5	22.5	48034000	34476000	28316000	225760000	25753000	92816000	0	0	0	0	0	0
A0A075B5S4		Ighv3-3	13.3	13.3	11.239	98	0.0095238	2.56	13.3	13.3	0	0	0	0	6054400	25875000	0	0	0	0	0	0	0	0	0	0
A0A075B5S6		Ighv3-1	25	25	13.109	116	0.0021692	3.4665	0	7.8	7.8	0	0	25	0	14040000	10852000	0	0	3988600	0	0	0	0	0	0
A0A075B5S8	Ig heavy chain V region 3-6	Ighv3-6	22.8	22.8	12.867	114	0	20.995	22.8	17.5	17.5	0	17.5	17.5	23613000	15053000	14453000	0	36712000	43689000	99276000	77655000	79773000	0	0	328530000
A0A075B5S9		Ighv9-4	36.7	29.6	10.934	98	0.002079	3.1477	0	0	7.1	29.6	13.3	0	0	0	0	68544000	5240200	0	0	0	0	0	0	0
A0A075B5T0		Ighv3-8	15.3	15.3	14.936	131	0	4.1801	0	0	0	15.3	15.3	0	0	0	0	34298000	12068000	0	0	0	0	0	0	0
A0A075B5T2		Ighv6-3	43.2	20.3	13.259	118	0	43.834	43.2	43.2	43.2	43.2	41.5	43.2	151070000	160990000	116130000	174400000	144510000	148950000	510920000	547900000	384640000	432730000	372960000	668900000
A0A075B5T3	Ig heavy chain V-III region T957;Ig heavy chain V-III region W3082	Ighv6-6	31.9	10.9	13.293	119	0.0022075	3.5846	31.9	31.9	31.9	24.4	31.9	24.4	36325000	23707000	16863000	9525200	38710000	0	0	0	0	0	0	0
A0A075B5T5		Ighv1-5	44.9	44.9	10.846	98	0	20.922	25.5	25.5	0	38.8	44.9	38.8	39175000	30483000	0	60672000	289400000	14183000	0	0	0	130990000	536270000	0
A0A075B5T6		Ighv10-3	23.5	23.5	13.544	119	0	6.5471	0	12.6	0	23.5	12.6	12.6	0	15574000	0	86769000	22134000	6014900	0	55168000	0	325610000	0	0
A0A075B5T7		Ighv1-7;Ighv1-4	38.5	17.9	13.16	117	0	12.755	17.9	17.9	17.9	36.8	25.6	25.6	12929000	22303000	21141000	188110000	34059000	15260000	0	0	0	0	0	0
A0A075B5T9		Ighv1-9	21.6	21.6	12.931	116	0	17.376	21.6	21.6	21.6	21.6	0	0	19279000	112680000	32633000	147240000	0	0	0	0	0	0	0	0
A0A075B5U0		Ighv1-12	28.6	21.4	10.778	98	0.0093633	2.437	28.6	7.1	7.1	7.1	0	7.1	8779900	0	0	0	0	0	0	0	0	0	0	0
A0A075B5U4		Ighv1-18	51	34.3	11.295	102	0	14.465	36.3	36.3	36.3	51	31.4	51	16575000	22807000	34760000	615780000	785320000	1942899999.9999998	0	0	0	2615900000	0	4183399999.9999995
A0A075B5U5		Ighv1-19	36.2	17.2	12.856	116	0.0091075	2.2282	36.2	19	19	36.2	30.2	36.2	13974000	0	0	25018000	9986400	11964000	0	0	0	0	0	0
A0A075B5U6		Ighv1-20;Ighv1-37	31.9	25.9	13.071	116	0	16.585	25.9	25.9	25.9	25.9	25.9	25.9	27727000	8616400	17614000	89530000	369560000	32565000	101470000	80446000	83347000	329740000	808140000	204110000
A0A075B5U7		Ighv1-22	38.5	29.9	13.022	117	0	6.6724	21.4	38.5	21.4	38.5	38.5	38.5	36177000	33540000	12993000	18336000	33589000	17393000	0	60665000	0	342860000	95368000	571890000
A0A075B5V0		Ighv1-26	44.4	0	12.91	117	0	227.85	27.4	44.4	27.4	44.4	27.4	44.4	200780000	49090000	59934000	447080000	438780000	876960000	0	362840000	0	1246400000	0	0
A0A075B5V3		Ighv1-36	30.2	30.2	12.904	116	0.0021552	3.4384	12.9	0	0	30.2	0	0	43975000	0	0	48958000	0	0	0	0	0	0	0	0
A0A075B5V5		Ighv1-39	29.9	29.9	12.93	117	0	323.31	17.1	17.1	17.1	29.9	29.9	29.9	109100000	139150000	86075000	4449300000	617010000	436710000	0	0	0	3795399999.9999995	433000000	366160000
A0A075B5V6		Ighv1-42	72.4	35.7	10.776	98	0	122.27	57.1	57.1	57.1	72.4	39.8	57.1	239630000	282010000	258620000	966360000	18017000	890850000	1587599999.9999998	1184300000	1586999999.9999998	9232300000	4744900000	6645199999.999999
A0A075B5V7		Ighv1-43	69.4	36.7	10.761	98	0	13.978	17.3	17.3	17.3	54.1	15.3	33.7	0	0	0	23230000	8970500	0	0	0	0	0	0	0
A0A075B5V8		Ighv1-47	31.6	31.6	11.083	98	0	4.7508	0	15.3	15.3	16.3	31.6	31.6	0	10554000	6357800	16225000	6414400	22694000	0	0	0	0	0	0
A0A075B5W2		Ighv1-52	40.5	21.6	12.989	116	0	9.1169	27.6	6	27.6	40.5	21.6	27.6	41777000	0	17111000	291280000	20395000	5622400	0	0	0	0	0	0
A0A075B5W3		Ighv1-53	40.2	21.4	12.791	117	0	21.202	6	6	27.4	40.2	21.4	27.4	0	0	13484000	219440000	42516000	64917000	0	0	0	0	0	0
A0A075B678		Ighv8-14;Ighv8-9;Ighv8-6;Ighv8-13;Ighv8-5;Ighv8-11	10.1	10.1	11.009	99	0.0020833	3.1673	10.1	10.1	0	0	10.1	0	16755000	52270000	0	0	10943000	0	0	0	0	0	0	0
A0A075B5W5		Ighv1-54	27.4	21.4	12.75	117	0	14.262	0	0	0	27.4	27.4	6	0	0	0	107190000	37668000	0	0	0	0	0	0	0
A0A075B5W6		Ighv1-55	21.4	21.4	12.687	117	0	11.366	21.4	21.4	21.4	21.4	21.4	21.4	195790000	45106000	34020000	457370000	63213000	238470000	0	0	0	0	0	0
A0A075B5W9		Ighv1-58	12.8	12.8	12.995	117	0.0095602	2.5698	0	0	0	12.8	0	12.8	0	0	0	49193000	0	14935000	0	0	0	0	0	0
A0A075B5X0		Ighv1-59	34.5	21.6	12.825	116	0	11.299	21.6	21.6	0	34.5	0	21.6	44055000	22631000	0	36997000	0	86997000	0	0	0	0	0	0
A0A075B5X2		Ighv1-63	27.4	21.4	12.9	117	0.0021413	3.379	21.4	0	21.4	6	6	6	23201000	0	49407000	0	0	0	0	0	0	0	0	0
A0A075B5X3		Ighv1-64	40.2	21.4	12.922	117	0	139.49	6	6	6	40.2	0	6	0	0	0	125490000	0	0	0	0	0	0	0	0
A0A075B5X7		Ighv1-69;Ighv1-50	34.5	21.6	12.891	116	0	96.202	21.6	21.6	21.6	34.5	21.6	21.6	36300000	53299000	52496000	11695000	120040000	117700000	0	0	0	0	0	0
A0A075B5Y1	Ig heavy chain V region 102	Ighv1-74	40.5	21.6	12.9	116	0	13.252	27.6	16.4	27.6	40.5	11.2	27.6	40489000	16731000	19806000	302260000	7868700	5396700	98150000	0	64444000	886390000	204720000	248300000
A0A075B5Y2		Ighv1-75	40.2	21.4	12.957	117	0	6.3943	6	40.2	18.8	18.8	12.8	18.8	0	34125000	0	0	0	0	0	0	0	0	0	0
A0A075B5Y3		Ighv1-80	35.9	29.9	12.763	117	0	93.5	17.1	29.9	17.1	35.9	35.9	18.8	21532000	86623000	23919000	340750000	70900000	15409000	0	175790000	127450000	752770000	352140000	0
A0A075B5Y4		Ighv1-81	47	32.5	12.989	117	0	118.47	28.2	41	41	47	27.4	47	184450000	167260000	139570000	1161500000	768190000	2150900000	427440000	324620000	410650000	2861900000	1933999999.9999998	4316200000
A0A075B5Y5		Ighv1-84;Ighv1-66	30.8	17.9	12.967	117	0	6.4288	17.9	30.8	30.8	30.8	12.8	12.8	35135000	45516000	55163000	132490000	0	0	0	0	0	0	0	0
A0A075B663	Ig lambda-1 chain V region;Ig lambda-1 chain V region S43;Ig lambda-2 chain V region MOPC 315;Ig lambda-1 chain V region H2020	Iglv1	35.9	28.2	12.312	117	0	65.803	28.2	28.2	28.2	35.9	35.9	28.2	8517200	32149000	132920000	625150000	151800000	20463000	317650000	869400000	0	3669199999.9999995	337130000	0
A0A075B664	Ig lambda-2 chain V region	Iglv2	36.2	28.4	12.165	116	0	15.445	28.4	28.4	28.4	36.2	7.8	0	44037000	81049000	14572000	28632000	0	0	0	0	0	0	0	0
A0A075B666		Igkv12-47	39.1	18.3	12.709	115	0	5.4287	20.9	13.9	13.9	39.1	20.9	39.1	0	0	0	38196000	0	3811400	0	0	0	139470000	0	36879000
A0A075B674		Ighv1-78	38.8	31.6	11.047	98	0	3.8376	16.3	31.6	0	23.5	7.1	23.5	29261000	35723000	0	41312000	0	28460000	0	0	0	0	0	0
A0A075B677		Igkv4-53	41.2	41.2	10.366	97	0	25.367	41.2	41.2	41.2	18.6	18.6	18.6	105020000	85211000	94535000	160030000	84532000	45827000	202130000	258710000	169900000	247270000	0	300950000
A0A075B680		Ighv1-62-2	39	30	11.224	100	0.007874	2.6932	11	0	0	18	20	39	6921900	0	0	18737000	5906000	27129000	0	0	0	0	0	0
A0A075B697	Ig heavy chain V region PJ14;Ig heavy chain V region MOPC 141	Ighv2-9-1	27.6	27.6	12.481	116	0	15.417	27.6	27.6	9.5	9.5	9.5	9.5	322310000	211710000	93086000	135790000	296250000	485050000	0	0	0	0	0	0
A0A075B6D5		Igkv19-93	30.7	23.7	12.734	114	0	4.9996	9.6	23.7	9.6	16.7	9.6	7	24329000	25071000	8547400	114220000	9300400	0	0	0	0	0	0	0
E9PWZ2		Scgb1b20;Abpa29_a7;Scgb1b11	15.1	15.1	10.104	93	0	21.739	0	0	15.1	0	0	15.1	0	0	6088400	0	0	2904700	0	0	544960000	0	0	324720000
A0A087WRA1	Actin-related protein 3	Actr3	20.8	10.2	24.114	216	0	6.8629	10.2	20.8	0	0	10.2	0	5472800	1801300	0	0	22131000	0	0	0	0	0	0	0
A0A087WSF4		9830147E19Rik	1.4	1.4	75.904	635	1	-2	1.4	0	0	0	0	0	5545300	0	0	0	0	0	0	0	0	0	0	0
A0A087WSM0		Gm973	3.7	3.7	40.864	355	1	-2	0	0	0	3.7	0	0	0	0	0	0	0	0	0	0	0	0	0	0
A0A087WSN6	Fibronectin;Anastellin	Fn1	57	57	253.01	2296	0	323.31	52.2	48.1	53	51.1	48.1	51.7	2093599999.9999998	2090199999.9999998	1927299999.9999998	2979999999.9999995	1327400000	2384700000	14441000000	13817000000	11987000000	18692000000	11126000000	20855000000
P07758	Alpha-1-antitrypsin 1-1	Serpina1a	55.4	7.3	46.002	413	0	38.034	54.2	54.2	55.4	47	38.7	47	6806900	5667800	3152200	0	0	0	65044000	0	55336000	0	0	0
A0A0A0MQA5	Tubulin alpha-4A chain	Tuba4a	31.7	4	52.793	477	0	3.5912	24.9	25.2	25.2	23.1	31.7	12.8	5467700	15127000	16732000	5479700	41295000	3058100	0	101260000	121960000	69973000	310660000	0
A0A1D5RLD8	Glyceraldehyde-3-phosphate dehydrogenase	Gapdh;Gm3839	52.6	52.6	35.812	333	0	98.814	38.4	42.6	47.7	30	30	23.4	117840000	68440000	95224000	122190000	162820000	17821000	357020000	256400000	285150000	436320000	659390000	164990000
A0A0A0MQG2	Spectrin beta chain, non-erythrocytic 1	Sptbn1	1	1	244.25	2092	0.0021645	3.4528	0.3	0	0.3	0	0.6	0	311560	0	660760	0	61871	0	0	0	0	0	0	0
J3QPS8	Eukaryotic translation initiation factor 5A;Eukaryotic translation initiation factor 5A-1	Eif5a	31.6	31.6	8.4395	76	0	9.6872	0	31.6	31.6	30.3	30.3	0	0	7398100	9376600	7297000	4466700	0	0	0	0	0	0	0
A0A0A6YW67	Ubiquitin-60S ribosomal protein L40;Ubiquitin;60S ribosomal protein L40;Ubiquitin-40S ribosomal protein S27a;Ubiquitin;40S ribosomal protein S27a;Polyubiquitin-B;Ubiquitin;Polyubiquitin-C;Ubiquitin;Ubiquitin-related 1;Ubiquitin-related 2	Gm8797;Uba52;Kxd1;Ubc;Ubb;Rps27a	32.5	32.5	8.7279	77	0	4.9697	20.8	20.8	32.5	20.8	20.8	0	15656000	21372000	30541000	43995000	21567000	0	0	0	0	0	0	0
A0A0A6YWI9		Ighv1-11	23.1	23.1	12.864	117	0	7.7026	0	23.1	0	0	0	0	0	7248000	0	0	0	0	0	0	0	0	0	0
A0A0A6YXA5		Ighv1-15	48.7	40.2	12.953	117	0	15.822	42.7	42.7	8.5	48.7	48.7	48.7	23287000	94103000	0	14746000	13108000	16826000	84605000	168010000	0	175220000	174570000	287240000
A0A0A6YXF1		Ighv3-4	17.1	17.1	12.957	117	0	3.9664	17.1	17.1	17.1	0	0	0	16919000	12626000	5325800	0	0	0	0	0	0	0	0	0
F6TQW2	Ig gamma-2A chain C region secreted form	Ighg2c	17.1	10.4	44.095	404	0	38.195	4	4	8.2	16.3	4	17.1	0	0	15017000	545850000	0	1561499999.9999998	0	0	432840000	2104899999.9999998	0	5673400000
A0A0A6YYE7		Igkv4-57	27.4	0	12.689	117	0.0020704	3.1156	27.4	27.4	27.4	27.4	27.4	27.4	35947000	20015000	19761000	56345000	74615000	81794000	0	0	0	0	0	0
A0A0B4J1H6	Ig kappa chain V-II region 7S34.1	Igkv2-137	20	20	13.131	120	0	9.0883	9.2	20	9.2	20	20	20	91357000	190280000	112500000	331930000	131580000	314920000	0	0	0	0	692470000	1176900000
A0A0B4J1H7		Igkv1-135;Igkv1-133	34.2	34.2	13.305	120	0	33.513	34.2	34.2	34.2	34.2	34.2	34.2	230740000	187570000	140950000	308390000	315030000	792590000	404880000	317800000	326420000	741310000	918330000	2012099999.9999998
A0A0B4J1I0		Igkv1-110	38.7	21.8	13.079	119	0.004	2.8053	10.9	10.9	10.9	38.7	10.9	16.8	0	0	0	29112000	0	0	0	0	0	0	0	0
A0A0B4J1I1		Igkv16-104	23.3	23.3	12.874	116	0	53.021	23.3	23.3	23.3	23.3	23.3	23.3	388360000	672300000	557780000	1835599999.9999998	735070000	567880000	431470000	443990000	580910000	1830999999.9999998	964210000	887480000
A0A0B4J1I4		Igkv4-72	27.4	13.7	12.641	117	0.0096154	2.5873	13.7	13.7	13.7	27.4	13.7	27.4	0	0	0	0	0	4712200	0	0	0	0	0	0
A0A0B4J1I9	Ig kappa chain V-VI region NQ2-6.1	Igkv4-55	27.4	13.7	12.736	117	0	18.776	27.4	27.4	13.7	27.4	27.4	27.4	0	18606000	0	52105000	60441000	0	0	0	0	0	0	0
A0A0B4J1J1		Igkv5-45	23.5	13	12.718	115	0	4.3176	23.5	23.5	23.5	23.5	23.5	23.5	56065000	74122000	75659000	61717000	88521000	143500000	0	0	0	0	0	0
A0A0B4J1J2		Igkv5-43	23.5	13	12.6	115	0.0020325	2.9601	23.5	23.5	23.5	23.5	23.5	23.5	24990000	65664000	62970000	29319000	240790000	391100000	0	0	0	0	0	0
A0A0B4J1J4		Ighv9-2	52.1	29.1	13.354	117	0	4.207	46.2	17.1	23.1	17.1	17.1	17.1	12513000	0	0	0	0	0	0	0	0	0	0	0
A0A0B4J1J5		Ighv9-3	52.1	29.1	12.996	117	0	93.441	29.9	29.9	35.9	46.2	46.2	33.3	43651000	36595000	43286000	545320000	419090000	217050000	293780000	168640000	183500000	595130000	618050000	446650000
A0A0B4J1J6		Ighv10-1	23.5	23.5	13.549	119	0	84.096	23.5	23.5	23.5	23.5	23.5	23.5	65457000	46298000	48228000	79006000	78546000	63184000	110400000	94373000	82730000	206020000	308600000	234430000
A0A0B4J1J7		Ighv1-82	42.9	28.6	10.65	98	0	7.1412	28.6	15.3	15.3	42.9	42.9	27.6	118400000	22959000	32147000	852500000	568830000	525570000	871130000	0	0	1587699999.9999998	1173300000	1455700000
A0A0B4J1M0		Ighv1-77	49	26.5	10.662	98	0	6.1917	12.2	15.3	15.3	49	22.4	34.7	8046800	0	0	8735500	0	18810000	0	0	0	0	0	0
A0A0B4J1N0		Ighv1-76	55.1	39.8	10.879	98	0	50.862	39.8	55.1	55.1	55.1	55.1	55.1	38536000	60911000	70301000	398610000	85649000	251000000	191040000	201400000	139240000	804300000	206010000	588070000
A0A0G2JE99	Ig lambda-1 chain C region		45.3	45.3	11.575	106	0	222.21	45.3	45.3	45.3	45.3	45.3	16	87100000	384110000	288500000	2287800000	300380000	23828000	231950000	500900000	801910000	3260099999.9999995	634130000	0
A0A0G2JGQ8	Ig lambda-3 chain C region	Iglc3	34.3	34.3	11.371	105	0	4.729	34.3	14.3	30.5	14.3	34.3	0	18192000	19769000	8914900	0	21029000	0	68573000	0	0	0	82481000	0
A0A0J9YVJ0		Mgam	2.8	2.8	112.82	986	0.003992	2.8042	2.8	1	1	0	0	0	1294000	971490	1324100	0	0	0	0	0	0	0	0	0
A0A0N4SV66	Histone H2A;Histone H2A.J;Histone H2A type 2-C;Histone H2A type 1-H;Histone H2A type 3;Histone H2A type 2-A;Histone H2A type 1-F;Histone H2A type 1-K;Histone H2AX;Histone H2A.V;Histone H2A.Z;Histone H2A type 2-B	Hist1h2aa;H2afj;Hist2h2ac;Hist1h2ah;Hist3h2a;Hist2h2aa1;Hist1h2af;Hist1h2ak;H2afx;H2afv;H2afz;Hist2h2ab	33.3	33.3	13.66	126	0	115.29	0	0	0	5.6	20.6	33.3	0	0	0	12114000	26904000	480060000	0	0	0	0	108010000	823250000
A0A0N4SVL8	Multimerin-1	Mmrn1	20	20	135.88	1209	0	75.895	13.8	11.4	11.9	7.8	9.7	9.7	7044600	7919100	6822800	5041700	6710500	5035400	108010000	107190000	113880000	90003000	169250000	127280000
A0A0R4IZZ5	C-type lectin domain family 4 member F	Clec4f	6.4	6.4	61.254	548	0	4.6873	6.4	6.4	1.6	0	0	0	3244500	1910600	722080	0	0	0	27679000	22149000	0	0	0	0
A0A0R4J005	LIM and senescent cell antigen-like-containing domain protein 1	Lims1	5.9	5.9	38.387	337	0	3.9111	3.6	3.6	3.6	3.6	2.4	3.6	3721200	6174100	4757600	1601100	3076700	1409500	0	0	0	0	0	0
P06683	Complement component C9	C9	32.1	32.1	62.002	548	0	212.13	27.4	30.3	32.1	25.4	10	17.5	177180000	194350000	534040000	47151000	2880400	45126000	656830000	653500000	1676499999.9999998	237790000	64995000	293700000
A0A0R4J038	Kininogen-1;Kininogen-1 heavy chain;Bradykinin;Kininogen-1 light chain	Kng1	27.4	23.1	73.1	661	0	205.31	25	21	19.7	22.5	22.8	20.3	879500000	1153500000	739760000	925400000	831110000	1676799999.9999998	3667099999.9999995	4215499999.9999995	3183599999.9999995	4536700000	4756100000	6592799999.999999
Q9ESB3	Histidine-rich glycoprotein	Hrg	30.7	30.7	59.162	525	0	232.95	19.4	26.7	20.8	21.1	16	25.1	261500000	369560000	216140000	357260000	329370000	402960000	722250000	857880000	662370000	901780000	1224100000	1328200000
A0A0R4J0I1			44.3	4.8	46.672	418	0.0020747	3.1368	38.5	33	40.4	34.7	34.4	36.1	12486000	12234000	16561000	2545400	0	0	0	0	0	0	0	0
A0A0R4J0M4	Apolipoprotein F	Apof	6.7	6.7	35.425	326	0	7.0779	6.7	0	0	0	0	0	3261000	0	0	0	0	0	0	0	0	0	0	0
A0A1Y7VKG6	Collectin-11	Colec11	9.4	9.4	29.511	278	0.0021978	3.5497	9.4	3.2	3.2	3.2	3.2	3.2	6056200	1980500	1709400	4571000	1868500	1521900	0	0	0	0	0	0
A0A0R4J0N9			3	3	50.767	440	1	-2	0	0	0	3	0	0	0	0	0	14145000	0	0	0	0	0	0	0	0
A0A0R4J0Q4	Lysyl oxidase homolog 1	Loxl1	14.8	14.8	66.495	607	0	11.446	9.9	4.1	1.8	9.6	4.1	8.9	2858800	810910	695150	4440500	609300	825070	38470000	37144000	0	50681000	0	48456000
A0A0R4J0S2	Insulin-like growth factor-binding protein complex acid labile subunit	Igfals	36.3	36.3	66.989	603	0	192.31	33	35.2	31.5	13.4	2	12.6	127300000	256840000	124150000	29142000	745790	13619000	1236000000	1424200000	992650000	260380000	0	121230000
A0A0R4J0X5			53.5	0	45.854	413	0	323.31	52.3	52.3	53.5	47	38.7	47	4210599999.9999995	6795199999.999999	5516500000	1486299999.9999998	782230000	2629300000	19769000000	25775000000	25033000000	7078899999.999999	8487499999.999999	14126000000
A0A0R4J0Z1	Protein disulfide-isomerase A4	Pdia4	6.4	6.4	72.369	641	0	4.4524	1.6	1.4	1.6	0	5	1.6	2346600	311280	3305300	0	3578000	5499600	0	0	0	0	0	0
D3Z7N2	Elongation factor 1-delta	Eef1d	17.1	17.1	14.182	129	0.0096712	2.5975	0	0	0	17.1	0	0	0	0	0	1921900	0	0	0	0	0	0	0	0
A0A0R4J1K2	Otoferlin	Otof	1.2	1.2	226.09	1992	0.0091408	2.2484	0.6	0	0.6	0	0	0	2308000	0	641500	0	0	0	0	0	0	0	0	0
E9QP56	Apolipoprotein C-III	Apoc3	36.5	36.5	15.163	137	0	89.356	36.5	36.5	36.5	36.5	36.5	36.5	2746100000	1469599999.9999998	1379200000	1359100000	863900000	153380000	13629000000	9995300000	8810000000	7349699999.999999	5962599999.999999	6236399999.999999
A0A0R4J207	Proteoglycan 4;Proteoglycan 4 C-terminal part	Prg4	7.8	7.8	48.006	423	0	5.8428	0	0	0	7.8	2.6	7.8	0	0	0	10564000	3397400	12992000	0	0	0	67086000	0	94190000
A0A0R4J291	FAST kinase domain-containing protein 5	Fastkd5	1.5	1.5	91.621	807	1	-2	0	1.5	0	0	0	0	0	334030	0	0	0	0	0	0	0	0	0	0
P19096	Fatty acid synthase;[Acyl-carrier-protein] S-acetyltransferase;[Acyl-carrier-protein] S-malonyltransferase;3-oxoacyl-[acyl-carrier-protein] synthase;3-oxoacyl-[acyl-carrier-protein] reductase;3-hydroxyacyl-[acyl-carrier-protein] dehydratase;Enoyl-[acyl-carrier-protein] reductase;Oleoyl-[acyl-carrier-protein] hydrolase	Fasn	1.6	1.6	272.43	2504	0	4.2184	0	0	0	0.9	0.8	0	0	0	0	213020	249220	0	0	0	0	0	0	0
A0A0U1RNK8	General transcription factor 3C polypeptide 1	Gtf3c1	8.3	8.3	22.614	193	1	-2	0	0	0	8.3	0	0	0	0	0	14774000	0	0	0	0	0	0	0	0
A0A140LJK6		4930438A08Rik	5.2	5.2	33.688	305	1	-2	0	0	5.2	0	0	0	0	0	5992800	0	0	0	0	0	0	0	0	0
A0A140T8M0	Ig kappa chain V-II region 26-10	Igkv1-99;Igkv1-115	38.7	21.8	13.117	119	0	56.072	32.8	32.8	32.8	38.7	32.8	38.7	428190000	316880000	398190000	2465500000	897110000	2196200000	2063299999.9999998	1888999999.9999998	2039399999.9999998	4473000000	2439800000	4580700000
A0A140T8M2			40.9	7.8	12.557	115	0	129.81	20	27.8	19.1	27.8	40.9	40.9	115870000	171250000	103290000	718780000	630820000	1071599999.9999999	212160000	209460000	192490000	1122200000	1078000000	2176800000
A0A140T8M3			50.4	30.6	13.335	121	0	181.34	44.6	44.6	29.8	50.4	37.2	50.4	219330000	228380000	179170000	560050000	251800000	305030000	282170000	250770000	281180000	729790000	645800000	669880000
A0A140T8M4			38.6	17.8	11.116	101	0.0094162	2.4658	38.6	38.6	20.8	38.6	29.7	38.6	19549000	23645000	0	49858000	22149000	51766000	0	0	0	0	0	0
A0A140T8M5			33.9	26.1	12.757	115	0	11.705	26.1	26.1	26.1	33.9	33.9	26.1	39878000	40047000	13473000	289100000	231870000	81258000	0	0	328460000	870930000	1537199999.9999998	0
A0A140T8N0	Ig kappa chain V-V region MOPC 41	Gm5571	30.8	30.8	12.805	117	0	261.88	30.8	30.8	30.8	30.8	29.9	30.8	399210000	405160000	162300000	4110399999.9999995	284460000	622300000	583100000	450690000	458520000	11827000000	533220000	1269800000
A0A140T8N3			39.1	18.3	12.617	115	0	25.535	27	25.2	13.9	32.2	32.2	39.1	24970000	161920000	36849000	969040000	292050000	1119000000	137450000	279190000	135040000	852880000	697660000	2413700000
A0A140T8N4			17.4	17.4	12.606	115	0	28.001	10.4	10.4	10.4	17.4	17.4	17.4	45357000	73173000	81468000	315030000	140350000	68691000	0	0	0	843690000	533540000	261030000
A0A140T8N5			40	18.3	12.787	115	0	9.2344	33.9	40	40	40	13.9	40	95218000	33058000	33107000	65983000	0	23365000	0	0	0	0	0	0
A0A140T8N7			40	0	12.739	115	0	4.8362	15.7	21.7	21.7	40	13.9	21.7	0	0	0	25811000	0	0	0	0	0	0	0	0
A0A140T8N9			40	33.9	12.656	115	0	17.215	18.3	18.3	18.3	26.1	32.2	33.9	22239000	14904000	37509000	150960000	59178000	262880000	0	0	0	430080000	669340000	808360000
A0A140T8P1			34.8	20.9	12.848	115	0	8.1448	7.8	13.9	13.9	21.7	34.8	27	0	46626000	41553000	627420000	320940000	535990000	0	0	0	1607199999.9999998	1314800000	1433300000
A0A140T8P2	Ig kappa chain V-V region MOPC 21	Igkv6-29	40	26.1	12.64	115	0	27.476	33.9	33.9	33.9	33.9	40	26.1	561730000	319620000	273770000	732440000	1084500000	186910000	822130000	732060000	533840000	1205900000	1882499999.9999998	914300000
A0A140T8P3			9.6	9.6	12.547	115	0	3.7947	0	9.6	0	0	0	0	0	435280000	0	0	0	0	0	0	0	0	0	0
A0A140T8P5			29.8	17.4	13.264	121	0	132.44	29.8	29.8	29.8	29.8	22.3	22.3	222500000	166000000	144760000	468030000	234670000	271860000	346640000	338860000	219420000	713950000	0	0
A0A140T8P6			40.9	29.6	12.562	115	0	323.31	40.9	40.9	27.8	40.9	40.9	40.9	67008000	135670000	137350000	314970000	116050000	433190000	688970000	554260000	0	815560000	542760000	1374700000
A0A140T8P7			27.5	7.5	13.128	120	0	4.4479	20	27.5	27.5	27.5	12.5	20	0	10724000	14589000	22999000	0	0	0	0	0	0	0	0
A0A140T8P9	Ig kappa chain V-V region L6;Ig kappa chain V-V region T1		35	22.2	13.232	117	0	5.8405	35	19.7	35	19.7	35	19.7	43419000	31764000	17184000	139740000	483880000	399780000	476520000	0	252590000	0	913170000	0
A0A1B0GQV5	Serum amyloid A-2 protein;Amyloid protein A	Saa2	73.9	53.4	10.074	88	0	156.93	0	0	0	73.9	25	73.9	0	0	0	1103700000	17146000	1089300000	0	0	0	1705199999.9999998	111710000	1855399999.9999998
A0A1B0GSI1	Dedicator of cytokinesis protein 1	Dock1	1.7	1.7	81.5	713	1	-2	0	0	0	0	0	1.7	0	0	0	0	0	0	0	0	0	0	0	0
A0A1B0GSR9	L-lactate dehydrogenase A chain;L-lactate dehydrogenase	Ldha	6	6	34.599	315	0.0020492	3.0094	0	2.9	2.9	3.2	3.2	3.2	0	1557600	2329900	3762400	3869300	5388000	0	0	0	0	0	0
A0A1D5RLQ0	Nuclear pore complex protein Nup93	Nup93	2.1	2.1	80.081	699	1	-2	0	0	0	0	0	2.1	0	0	0	0	0	0	0	0	0	0	0	0
A0A1W2P6F6	Myosin light polypeptide 6	Myl6	31.6	31.6	17.005	152	0	7.3113	0	10.5	15.8	0	15.1	11.2	0	27635000	27909000	0	43317000	14337000	0	0	0	0	0	0
A0A1W2P788	Mannosyl-oligosaccharide 1,2-alpha-mannosidase IA	Man1a1	5	5	82.042	744	0	7.8259	5	3.2	3.2	3.2	1.5	3.2	4754200	2826400	3974400	1745200	3463100	1344800	85048000	73227000	75645000	72980000	0	0
A0A1W2P7X3	Low molecular weight phosphotyrosine protein phosphatase	Acp1	8.8	8.8	12.562	114	0.0092081	2.3173	8.8	0	0	0	0	0	4186100	0	0	0	0	0	0	0	0	0	0	0
A0A1Y7VJW9	Fibulin-5	Fbln5	4.8	4.8	51.769	461	0	4.1635	3	3	4.8	3	4.8	0	8563900	8312300	12238000	7981800	1558900	0	82707000	0	0	78205000	0	0
A0A286YDE6	Rho guanine nucleotide exchange factor 3	Arhgef3	2.2	2.2	63.068	551	1	-2	0	0	0	0	0	2.2	0	0	0	0	0	2922700	0	0	0	0	0	0
A0A2I3BPT1	Amyloid beta A4 protein;N-APP;Soluble APP-alpha;Soluble APP-beta;C99;Beta-amyloid protein 42;Beta-amyloid protein 40;C83;P3(42);P3(40);C80;Gamma-secretase C-terminal fragment 59;Gamma-secretase C-terminal fragment 57;Gamma-secretase C-terminal fragment 50;C31	App	6.5	6.5	82.785	733	0	14.804	1.9	0	1.9	0	6.5	1.9	1336000	0	839960	0	2191000	0	0	0	0	0	0	0
A0A2I3BQE1		AI182371	15.1	15.1	39.898	351	0	10.873	15.1	10.8	15.1	4.3	3.7	7.4	26594000	11839000	14629000	1631100	6041700	9485100	88410000	69245000	81163000	0	0	85963000
A0A338P6F7	Roundabout homolog 1	Robo1	1.1	1.1	177.19	1622	0.0040241	2.8651	0.6	1.1	0.6	0.6	0.6	0	16377000	33040000	22517000	20134000	16879000	0	0	0	0	0	0	0
A0A338P6V9	Coiled-coil domain-containing protein 14	Ccdc14	1	1	97.18	886	0.0093284	2.4035	0	0	1	1	0	1	0	0	3469600	8122600	0	7003600	0	0	0	0	0	0
E9Q561	Eukaryotic initiation factor 4A-I;Eukaryotic initiation factor 4A-II;Eukaryotic initiation factor 4A-II, N-terminally processed	Eif4a2;Eif4a1	4.2	4.2	36.166	312	0.0094697	2.5207	0	4.2	0	4.2	4.2	0	0	1383900	0	3104500	2884300	0	0	0	0	0	0	0
A0A338P7C0	Proteasome subunit beta type-1	Psmb1	40.7	40.7	15.637	140	0	10.299	24.3	24.3	24.3	30.7	34.3	24.3	24072000	15690000	17692000	21052000	16189000	52194000	66521000	0	60555000	234060000	274190000	0
Q8CG19	Latent-transforming growth factor beta-binding protein 1	Ltbp1	2.4	2.4	186.72	1712	0	5.01	0.5	0.5	0	0.5	1.3	1.9	806840	448200	0	693170	527870	250780	0	0	0	0	0	0
A0A494B908	Glutathione S-transferase P 1;Glutathione S-transferase P 2	Gstp1;Gstp2	20	20	18.038	160	0	5.4837	20	20	20	20	20	10	11712000	14788000	12320000	19393000	20568000	1898700	58152000	44121000	37167000	76013000	134640000	0
E9Q2T3		Tnxb	0.9	0.9	339.9	3126	0.0020921	3.2383	0.9	0	0.4	0	0	0	126940	0	125980	0	0	0	0	0	0	0	0	0
A0A589MR22	FERM and PDZ domain-containing protein 4	Frmpd4	0.6	0.6	193.62	1760	1	-2	0	0	0.6	0	0	0	0	0	421850	0	0	0	0	0	0	0	0	0
Q3UTR7	Angiotensinogen;Angiotensin-1;Angiotensin-2;Angiotensin-3;Angiotensin-4;Angiotensin 1-9;Angiotensin 1-7;Angiotensin 1-5;Angiotensin 1-4	Agt	20.7	20.7	52.67	482	0	33.663	13.9	20.7	11.4	0	2.5	2.7	19026000	40929000	17511000	0	2948700	1323200	117360000	237390000	123930000	0	0	0
A0A5F8MPY2	60S acidic ribosomal protein P2	Rplp2	10.4	10.4	11.593	115	0.0091912	2.3096	0	0	0	10.4	0	10.4	0	0	0	14191000	0	12751000	0	0	0	0	0	0
A0A5H1ZRK8	Ig kappa chain C region		56.1	56.1	11.778	107	0	276.6	56.1	56.1	56.1	56.1	56.1	56.1	19091000000	14715000000	15948000000	61112000000	46433000000	52767000000	16091000000	15893000000	14105000000	52562000000	46820000000	66422000000
A0A5K1VVQ1	Titin	Ttn	0.1	0.1	2991.8	26938	0.0096339	2.5875	0	0	0	0.1	0	0.1	0	0	102220	560150	34595	1442600	0	0	0	861730000	0	1491099999.9999998
A0A9L6KDF6			0.3	0.3	390.19	3720	1	-2	0.3	0.3	0.3	0.3	0.3	0.3	1117900	1075500	1265900	2450800	589650	2161600	0	0	0	0	0	0
A0N8I8			13.4	13.4	12.839	119	0	9.46	0	0	0	0	13.4	13.4	0	0	0	0	22272000	29249000	0	0	0	0	111950000	152560000
A1BN54	Alpha-actinin-1	Actn1	20.1	12.2	102.72	887	0	38.518	5.6	10.9	16.3	5.6	13.3	0	798130	3533600	3532800	1189600	5675500	0	31266000	51598000	60235000	23566000	98585000	0
A2A6U3	Septin-9	Sept9	3.2	3.2	63.772	565	0.0093458	2.412	1.9	1.2	0	0	0	0	0	1946800	0	0	0	0	0	0	0	0	0	0
Q8K182	Complement component C8 alpha chain	C8a	49.4	49.4	66.08	587	0	323.31	32.5	33.9	46.8	29.1	16.9	19.9	221240000	305540000	904540000	160610000	104510000	159110000	1771099999.9999998	2021499999.9999998	4306100000	1171100000	949760000	1638499999.9999998
H7BX05	Obscurin	Obscn	0.3	0.3	874.53	8032	0.0091241	2.2466	0	0	0.1	0	0.2	0	0	0	96824	0	245420	0	0	0	0	0	0	0
A2AEN9		Gm5938	32.5	27.6	18.508	163	0	6.7631	32.5	0	0	15.3	4.9	12.9	26692000	0	0	10731000	0	36332000	0	0	0	0	0	0
A2BHD2		Gm14743;Obp1b	22.2	22.2	19.366	171	0	9.4056	13.5	13.5	0	13.5	8.8	0	31469000	3975100	0	6957700	3208300	0	0	0	0	0	0	0
A2AGH8	Mediator of RNA polymerase II transcription subunit 12	Med12	0.4	0.4	240.87	2157	1	-2	0.4	0	0	0	0	0	0	0	0	0	0	0	0	0	0	0	0	0
A2ALR8	Ubiquitin carboxyl-terminal hydrolase 48	Usp48	2.2	2.2	72.684	631	1	-2	0	0	2.2	0	0	0	0	0	4463900	0	0	0	0	0	0	0	0	0
A2ALV7	Proteasome-associated protein ECM29 homolog	AI314180;Ecm29	1.5	1.5	164.52	1490	0.0021786	3.5031	0.5	0.5	0.5	1	0	0.5	1683900	1147900	3131400	892060	0	2682100	0	0	0	0	0	0
A2APX3	Cystatin-C	Cst3	27.5	27.5	11.141	102	0.0020619	3.0991	10.8	27.5	10.8	10.8	0	0	6115500	3848800	10810000	12803000	0	0	0	0	0	0	0	0
A2APX8	Sodium channel protein	Scn1a	0.6	0.6	228.8	2009	1	-2	0	0.6	0	0	0	0	0	1359400	0	0	0	0	0	0	0	0	0	0
A2AQ07	Tubulin beta-1 chain	Tubb1	68.3	66.5	50.44	451	0	323.31	37	52.5	44.6	34.4	42.6	13.7	6725100	22032000	35739000	6131900	104120000	7012600	168150000	337970000	298910000	174050000	647920000	98945000
E9Q9J4	Inositol hexakisphosphate and diphosphoinositol-pentakisphosphate kinase 2;Inositol hexakisphosphate and diphosphoinositol-pentakisphosphate kinase 1	Ppip5k2;Ppip5k1	1.2	1.2	140.37	1242	0.0091743	2.2585	0	1.2	1.2	0	0	0	0	2185000	2098100	0	0	0	0	0	0	0	0	0
A2AUR7	Ras suppressor protein 1	Rsu1	51.5	51.5	29.543	260	0	25.982	3.5	33.1	19.2	11.2	34.6	0	2586900	13608000	23672000	6219900	52923000	0	0	78495000	79737000	51815000	222480000	0
A2AV25	Fibrinogen C domain-containing protein 1	Fibcd1	2.4	2.4	50.601	459	1	-2	0	0	0	0	0	2.4	0	0	0	0	0	14238000	0	0	0	0	0	0
E9QAQ7	AT-rich interactive domain-containing protein 1A	Arid1a	0.6	0.6	242.67	2287	1	-2	0	0	0	0.6	0	0	0	0	0	0	0	0	0	0	0	0	0	0
A2BIN1	Major urinary protein 2	Mup10;Mup1;Mup2;Mup14;Mup8;Mup11	45	6.1	20.681	180	0	41.045	13.3	13.3	45	0	0	0	9084300	8444300	61183000	0	0	0	71250000	124230000	459280000	0	0	0
A6X935	Inter alpha-trypsin inhibitor, heavy chain 4	Itih4	60	2.3	104.66	942	0	7.0759	53.2	47.3	51.7	54.9	47	51.3	19721000	824220	2714000	29774000	13545000	16775000	413860000	0	0	0	374600000	583510000
A6XA75	Trem-like transcript 1 protein	Treml1	5.3	5.3	26.101	243	0	4.4144	5.3	5.3	5.3	0	5.3	5.3	6361900	7430500	0	0	12251000	15233000	0	0	0	0	0	0
A8DUK4		Hbbt1;Hbb-bs	95.2	24.5	15.748	147	0	323.31	86.4	86.4	84.4	75.5	84.4	59.2	21227000000	23680000000	16283000000	17700000000	21217000000	630560000	36870000000	36791000000	25000000000	35252000000	53446000000	2360200000
A9C433	Beta-galactoside alpha-2,6-sialyltransferase 2	St6gal2	5.4	5.4	39.955	355	1	-2	0	0	5.4	0	0	0	0	0	9993200	0	0	0	0	0	0	0	0	0
Q8BVY4		Supt3	2.7	2.7	41.236	374	1	-2	0	2.7	2.7	2.7	0	0	0	5188400	11625000	20008000	0	0	0	0	0	0	0	0
B1AZS9	Peroxiredoxin-4	Prdx4	10.9	10.9	26.391	229	0	3.8351	0	4.8	4.8	0	6.1	6.1	0	6901500	3058900	0	2869100	5074500	0	0	0	0	0	0
G3X9E8		Ppp2r3a	2.6	2.6	61.105	530	0.0095057	2.5394	2.6	2.6	0	2.6	0	0	4726600	12387000	0	13377000	0	0	0	0	0	0	0	0
B2RXZ2	Cytochrome P450 2A12	Cyp2a22;Cyp2a12	4.1	4.1	56.318	492	0.009542	2.5676	1.6	1.6	1.6	2.4	0	0	3517600	4527400	4357000	470540	0	0	0	0	0	0	0	0
B7FAV1	Filamin-A	Flna	28.4	28.4	274.63	2583	0	253.9	9.1	18.8	19.7	13	24.4	11.2	2708400	9046700	10446000	4906800	40516000	4819700	97535000	175010000	233100000	152490000	630780000	147480000
B7ZCG3	BPI fold-containing family A member 2	Bpifa2	46.4	46.4	22.321	211	0	323.31	7.6	14.2	0	7.6	46.4	46.4	4327700	2185500	0	0	320650000	439350000	0	0	0	0	1565099999.9999998	2170900000
Q02596	Glycosylation-dependent cell adhesion molecule 1	Glycam1	25.2	25.2	16.209	151	0	4.3381	25.2	25.2	0	13.2	0	0	5260200	16350000	0	13548000	0	0	0	0	0	0	0	0
B8JJE0	G-protein coupled receptor 98	Adgrv1;Gpr98	0.2	0.2	687.6	6298	1	-2	0	0	0	0	0	0.2	0	0	0	0	0	186500	0	0	0	0	0	0
B8JJN0	Complement factor B;Complement factor B Ba fragment;Complement factor B Bb fragment	Gm20547;Cfb	34.3	22.2	142.32	1276	0	315.74	28.4	29.2	26.1	26.1	17.9	20.5	141040000	156390000	146220000	128000000	155700000	146070000	1053099999.9999999	1196700000	1284400000	1211600000	1376800000	1638899999.9999998
D3YVG4		Tmem184c	7.9	7.9	26.656	228	1	-2	0	0	0	7.9	0	0	0	0	0	3175600	0	0	0	0	0	0	0	0
D3YVU6	Partner and localizer of BRCA2	Palb2	1.1	1.1	111.31	1030	1	-2	1.1	0	0	0	0	0	865480	0	0	0	0	0	0	0	0	0	0	0
D3YXF5		C7	16.2	16.2	93.337	845	0	107.17	3.6	2.4	14.4	6.2	5.3	6.7	979060	3736600	23792000	2083000	1595900	9037900	55669000	0	655250000	46356000	41330000	43795000
D3YYY1	Secretoglobin family 2B member 20	Scgb2b7;Scgb2b20;Scgb2b11;Scgb2b18	22.3	22.3	12.585	112	0	4.1	0	0	15.2	0	0	7.1	0	0	21183000	0	0	29306000	0	0	0	0	0	0
D3Z1Y7		Zbtb38	4.3	4.3	20.675	184	1	-2	0	0	0	0	0	4.3	0	0	0	0	0	2567900000	0	0	0	0	0	0
D3Z3C3	Heparanase;Heparanase 8 kDa subunit;Heparanase 50 kDa subunit	Hpse	3.5	3.5	54.549	483	0.0092593	2.357	3.5	3.5	3.5	0	3.5	0	1416500	2209200	2451600	0	1816000	0	0	0	0	0	0	0
D3Z4R1	Probable ATP-dependent DNA helicase HFM1	Hfm1	1.5	1.5	161.38	1434	0.0020534	3.0141	0.8	0.8	1.5	0.8	0	0	1042400	660490	526370	445900	0	0	0	0	0	0	0	0
D3Z5G7	Carboxylic ester hydrolase	Ces1b	15.5	5.8	62.196	567	0	319.53	14.3	15.5	14.3	14.3	12.3	14.3	401070000	372640000	258630000	230070000	168400000	136480000	5570100000	4544100000	3685199999.9999995	2051099999.9999998	2773900000	2660900000
D3Z6I8		Tpm3;Tpm3-rs7	20.2	14.6	28.723	247	0	11.959	8.5	20.2	17.4	5.7	13	7.3	1004100	9173100	5449300	1434200	10646000	1883100	0	34889000	41522000	0	78123000	0
D3Z7M4	Insulin-like growth factor I	Igf1	11.1	11.1	15.075	135	0.0059524	2.7664	11.1	11.1	11.1	0	0	0	44208000	60329000	44081000	0	0	0	0	0	0	0	0	0
E0CXN0	Hepatocyte growth factor-like protein;Hepatocyte growth factor-like protein alpha chain;Hepatocyte growth factor-like protein beta chain	Mst1	9.6	9.6	79.714	707	0	13.14	7.5	8.2	6.1	3.7	2.8	5.1	9783600	8835600	9185800	8455600	3898000	5615300	113530000	144360000	160510000	128420000	158560000	135940000
E9PUM5		Gm4788	6.6	3.5	91.444	808	0	46.139	4.6	4.6	5.4	5.4	5.3	6.6	5067600	3857400	11301000	7975500	14447000	3241800	479030000	535930000	910750000	580970000	0	602290000
E9PV24	Fibrinogen alpha chain;Fibrinopeptide A;Fibrinogen alpha chain	Fga	43.7	43.7	87.428	789	0	323.31	30.8	33	34.3	39.5	27.4	28.1	48516000	59637000	50840000	361090000	97174000	76498000	376520000	369140000	353810000	1366600000	676540000	614120000
E9PVD2		Itih4	59.9	2.2	104.59	941	0	323.31	53.1	47.3	51.6	54.8	47	51.2	367880000	339710000	287660000	788960000	484690000	675040000	1569699999.9999998	1944499999.9999998	1287900000	3155299999.9999995	2118399999.9999998	3222099999.9999995
E9PWD2	Thrombospondin type-1 domain-containing protein 7A	Thsd7a	0.7	0.7	183.63	1646	1	-2	0	0	0	0	0	0.7	0	0	0	0	0	108360	0	0	0	0	0	0
E9PX63		H2-Q1;Gm8909	16.1	0	38.616	341	0.0020367	2.9809	16.1	16.1	13.8	10.9	9.7	9.7	26512000	17455000	7429800	15547000	0	0	184670000	156560000	0	0	0	0
E9PX70	Collagen alpha-1(XII) chain	Col12a1	10.9	10.9	333.73	3064	0	82.989	2.9	2.3	2.3	2.5	6.8	5	986390	1130400	1474400	17442000	5510800	30683000	825630000	398290000	755590000	1159600000	2743900000	2698100000
E9PYD7		Kbtbd6	1.6	1.6	61.347	549	1	-2	0	0	1.6	0	0	0	0	0	305150	0	0	0	0	0	0	0	0	0
E9PYL6	Inhibitor of nuclear factor kappa-B kinase subunit epsilon	Ikbke	1.4	1.4	78.03	693	1	-2	0	0	0	0	0	1.4	0	0	0	0	0	0	0	0	0	0	0	0
E9PZ00	Prosaposin	Psap	5.4	5.4	60.672	551	0.0020877	3.1964	0	5.4	0	0	0	0	0	1008800	0	0	0	0	0	0	0	0	0	0
E9PZC3	Flavin reductase (NADPH)	Blvrb	24.7	24.7	26.647	247	0	11.06	21.1	4	10.9	17.8	14.2	0	21812000	4960900	9926400	20319000	17925000	0	62924000	0	48953000	58111000	70384000	0
Q3V1J8	Hyaluronan-binding protein 2;Hyaluronan-binding protein 2 50 kDa heavy chain;Hyaluronan-binding protein 2 50 kDa heavy chain alternate form;Hyaluronan-binding protein 2 27 kDa light chain;Hyaluronan-binding protein 2 27 kDa light chain alternate form	Habp2	11.2	11.2	57.326	517	0	30.244	9.3	7.2	11.2	9.3	9.1	9.3	23108000	24518000	27263000	26510000	5741900	25129000	241010000	235950000	207120000	292580000	143470000	423480000
E9Q9C6		Fcgbp	0.5	0.5	275.24	2583	0.0094877	2.5361	0.5	0	0	0.5	0.5	0.5	318780	0	0	579880	111830	423880	0	0	0	0	0	0
E9Q242	Adenylosuccinate lyase	Adsl	4.7	4.7	53.13	469	0.002045	2.9896	0	0	0	4.7	0	0	0	0	0	2742300	0	0	0	0	0	0	0	0
F6URP1		Gm6619;5430401F13Rik	6.9	6.9	18.948	175	0	6.7733	0	0	0	6.9	0	0	0	0	0	2035700	0	0	0	0	0	0	0	0
E9Q414	Apolipoprotein B-100;Apolipoprotein B-48	Apob	54.4	54.4	509.43	4505	0	323.31	48.2	45.2	46.2	40	34.7	36	406140000	295310000	488380000	332640000	189740000	239940000	2407900000	1746999999.9999998	2588500000	2112299999.9999998	1519199999.9999998	2126799999.9999998
E9Q5Z7	FRAS1-related extracellular matrix protein 1	Frem1	1.1	1.1	242.68	2173	0.0077973	2.6195	0	1.1	1.1	0	1.1	0	0	5162500	3482300	0	917660	0	0	0	0	0	0	0
E9Q6C2	Complement C1s-A subcomponent;Complement C1s-A subcomponent heavy chain;Complement C1s-A subcomponent light chain;Complement C1s-B subcomponent;Complement C1s-B subcomponent heavy chain;Complement C1s-B subcomponent light chain	C1s1;C1sa;C1sb	27.7	27.7	77.499	694	0	323.31	22.8	21.6	22.9	25.5	22.2	22.3	224230000	185030000	244850000	358190000	112220000	207410000	1395000000	1066299999.9999999	1119400000	1625399999.9999998	1059799999.9999999	1407800000
E9Q6D8		C6	20.7	20.7	104.62	934	0	99.255	0	5.6	19.7	1.9	3.2	5.8	0	1840100	57413000	904610	3332100	3655800	0	17328000	601010000	0	27626000	46309000
Q61730	Interleukin-1 receptor accessory protein	Il1rap	13.5	13.5	65.74	570	0	22.206	11.9	11.9	13.5	6.7	6.7	6.7	15122000	17810000	31569000	1685500	3499700	810980	133350000	168250000	190440000	93448000	202880000	0
E9Q8I0	Complement factor H	Cfh	42.7	37.3	141.27	1252	0	323.31	21.6	16.6	36	21.1	25.9	35.6	2199700000	1369600000	2520800000	2653700000	2684200000	3389799999.9999995	15052000000	11520000000	18430000000	21880000000	26338000000	37971000000
E9QNS0	NACHT, LRR and PYD domains-containing protein 6	Nlrp6	1.5	1.5	98.736	882	1	-2	1.5	0	0	0	0	0	2989900	0	0	0	0	0	0	0	0	0	0	0
E9QPU1	von Willebrand factor;von Willebrand antigen 2	Vwf	2.1	2.1	309.15	2813	0	6.8607	2.1	0.5	0.8	0.5	0.5	0	1002700	200690	539790	296520	321050	0	39472000	0	33773000	0	0	0
F8WIP8	Osteopontin	Spp1	41	41	32.587	295	0	45.253	6.8	0	6.8	28.8	34.6	40.3	2248900	0	8876900	10249000	64147000	41221000	0	0	0	84664000	243720000	347400000
Q99L47	Hsc70-interacting protein	St13	6.7	6.7	41.655	371	0.0096899	2.6018	0	0	0	0	3.5	6.7	0	0	0	0	2162500	2186500	0	0	0	0	0	0
G3UXR2	Prolyl endopeptidase FAP;Antiplasmin-cleaving enzyme FAP, soluble form	Fap	14	14	85.079	736	0	13.314	12.5	4.1	7.5	0	0	0	2501200	940120	548640	0	0	0	85772000	94560000	73493000	0	0	0
G3X9T8		Cp	48.9	1	121.08	1060	0	323.31	45.8	41.1	45.5	44.4	39.9	41.9	348580000	341820000	448130000	877900000	865360000	1293500000	2846300000	3213399999.9999995	3030999999.9999995	5880399999.999999	6909899999.999999	9437800000
G3X8T3	Carboxypeptidase;Lysosomal protective protein;Lysosomal protective protein 32 kDa chain;Lysosomal protective protein 20 kDa chain	Ctsa	7.5	7.5	55.726	492	0.0021368	3.3787	3.9	3.7	0	0	0	0	2031100	2297300	0	0	0	0	0	0	0	0	0	0
G3X977	Inter-alpha-trypsin inhibitor heavy chain H2	Itih2	43.5	43.5	106.36	950	0	323.31	42.6	40.3	34.8	31.2	21.3	24.7	244260000	206210000	185350000	211840000	160330000	190800000	2363100000	2038499999.9999998	1965199999.9999998	2037799999.9999998	2462000000	2255200000
H3BJP2	S-formylglutathione hydrolase	Esd	22.3	22.3	27.131	247	0	15.993	18.2	8.9	8.9	8.9	22.3	0	13951000	12076000	8485000	3704600	32070000	0	78133000	0	0	0	154680000	0
H3BK84	cAMP-dependent protein kinase type II-beta regulatory subunit;cAMP-dependent protein kinase type II-alpha regulatory subunit	Prkar2b;Prkar2a	13.3	13.3	28.463	256	0	5.4665	0	0	0	0	13.3	0	0	0	0	0	1723300	0	0	0	0	0	0	0
H3BLG3		Rab26	2.4	2.4	32.629	295	0.0092764	2.3768	2.4	0	2.4	2.4	2.4	2.4	3914300	0	3947000	3539900	2175300	7975100	0	0	0	0	0	0
H7BWY6	Retinol-binding protein 4	Rbp4	24.1	24.1	28.405	245	0	69.46	24.1	24.1	24.1	15.9	12.7	11.4	69583000	102270000	103560000	40284000	4593800	30867000	370620000	286910000	493340000	234260000	53981000	130340000
H7BX99	Prothrombin;Prothrombin;Activation peptide fragment 1;Activation peptide fragment 2;Thrombin light chain;Thrombin heavy chain	F2	25.6	25.6	70.211	617	0	323.31	16.4	19.9	23.5	20.9	19.6	19.6	1074000000	1061599999.9999999	1072699999.9999999	790330000	667390000	688630000	5545300000	4541400000	4878300000	3455799999.9999995	3124999999.9999995	4143099999.9999995
H7BXC3	Triosephosphate isomerase	Tpi1	17.4	17.4	17.997	167	0.0095785	2.574	0	0	0	17.4	0	0	0	0	0	1145600	0	0	0	0	0	0	0	0
J3QJY4		Scgb1b3	15.1	15.1	10.061	93	0.0040161	2.8416	0	0	15.1	0	0	15.1	0	0	12869000	0	0	25224000	0	0	0	0	0	0
S4R2L0		Scgb2b12;Scgb2b19	15.2	15.2	12.774	112	0.0021882	3.5365	0	0	15.2	0	0	0	0	0	133380000	0	0	0	0	0	0	0	0	0
Q3UT17		5730507C01Rik	3.8	3.8	45.208	392	1	-2	0	0	3.8	0	3.8	0	0	0	74068000	0	90434000	0	0	0	0	0	0	0
O08529	Calpain-2 catalytic subunit	Capn2	4.7	4.7	79.871	700	0.0020202	2.9428	0	0	0	0	4.7	0	0	0	0	0	385620	0	0	0	0	0	0	0
O08538	Angiopoietin-1	Angpt1	35.5	35.5	57.518	498	0	89.324	25.3	23.9	27.5	21.5	21.3	19.9	28495000	31707000	50713000	23788000	53712000	42416000	171170000	161430000	193970000	134070000	299220000	295400000
O08648	Mitogen-activated protein kinase kinase kinase 4	Map3k4	0.9	0.9	179.83	1597	1	-2	0	0.9	0	0	0	0	0	5245900	0	0	0	0	0	0	0	0	0	0
O09159	Lysosomal alpha-mannosidase	Man2b1	7.8	7.8	114.65	1013	0	12.453	6.4	7.8	3.5	0	0	0	3257600	888160	1648400	0	0	0	36833000	46075000	28151000	0	0	0
O09164	Extracellular superoxide dismutase [Cu-Zn]	Sod3	27.5	27.5	27.392	251	0	12.05	15.5	27.5	19.1	23.5	8.8	5.2	8517100	10729000	2749600	19703000	11060000	6806300	55281000	70933000	51465000	40029000	52420000	0
O35176		Scgb1b2	48.4	48.4	10.288	93	0	55.63	35.5	14	35.5	45.2	14	48.4	108450000	16072000	11970000	48625000	11945000	14431000	313570000	0	227290000	232200000	0	317060000
O35744	Chitinase-like protein 3	Chil3	6.5	6.5	44.458	398	0.0021277	3.3497	0	0	0	0	3.5	6.5	0	0	0	0	1525000	3652700	0	0	0	0	0	0
O35930	Platelet glycoprotein Ib alpha chain	Gp1ba	9.3	9.3	80.054	734	0	28.835	7.9	7.9	7.9	5.2	7.6	1.6	13455000	19845000	17780000	7283500	3304200	4651200	109730000	104230000	86142000	79522000	0	0
O35945	Aldehyde dehydrogenase, cytosolic 1;Retinal dehydrogenase 1	Aldh1a7;Aldh1a1	5.4	5.4	54.587	501	0.009434	2.4952	0	0	0	0	5.4	0	0	0	0	0	1454300	0	0	0	0	0	0	0
O55188	Dentin matrix acidic phosphoprotein 1	Dmp1	1.8	1.8	53.964	503	1	-2	0	0	0	0	1.8	0	0	0	0	0	833830	0	0	0	0	0	0	0
O55222	Integrin-linked protein kinase	Ilk	15.9	15.9	51.373	452	0	10.941	3.1	11.1	12.8	2.2	5.5	0	822960	3078500	5674600	1727700	5622000	0	0	59707000	62561000	0	0	0
O55234	Proteasome subunit beta type-5	Psmb5	13.6	13.6	28.532	264	0	5.1996	0	0	3.4	8.3	5.3	13.6	0	0	1207300	4606600	1708700	7514300	0	0	0	42394000	0	59358000
O70165	Ficolin-1	Fcn1	33.5	33.5	36.298	334	0	47.186	33.5	32.9	24.6	19.5	9	2.7	38165000	47025000	26129000	18561000	14133000	4830000	169580000	144870000	114400000	106340000	109100000	0
O70435	Proteasome subunit alpha type-3	Psma3	22	22	28.405	255	0	9.5109	5.5	5.5	0	12.5	7.1	11	1173000	0	0	8101300	8158500	11551000	0	0	0	75672000	74986000	71558000
O70571	[Pyruvate dehydrogenase (acetyl-transferring)] kinase isozyme 4, mitochondrial	Pdk4	3.4	3.4	46.596	412	0.0092251	2.3301	3.4	3.4	3.4	0	0	0	3006400	385550	0	0	0	0	0	0	0	0	0	0
O88200	C-type lectin domain family 11 member A	Clec11a	14.9	14.9	36.451	328	0	9.454	14.9	12.8	5.5	3.4	3.4	3.4	7630000	4765000	6891500	6049500	6105700	1031400	63984000	48489000	0	0	0	0
O88342	WD repeat-containing protein 1	Wdr1	3.6	3.6	66.406	606	0.0021739	3.486	0	0	0	0	3.6	0	0	0	0	0	2347800	0	0	0	0	0	0	0
O88783	Coagulation factor V;Coagulation factor V heavy chain;Coagulation factor V light chain	F5	32.6	32.6	247.23	2183	0	323.31	25.9	28.5	23.6	22.9	22.1	19.4	119680000	112280000	88127000	81333000	74985000	62302000	616820000	562830000	559870000	506760000	519730000	664580000
Q3U3V1	Coagulation factor X;Factor X light chain;Factor X heavy chain;Activated factor Xa heavy chain	F10	20.1	20.1	55.255	493	0	201.41	16.8	15	20.1	13.6	15.2	16.8	1120700000	1105400000	1201400000	767000000	462360000	932670000	3331799999.9999995	2729300000	3310099999.9999995	2713400000	1605499999.9999998	3151899999.9999995
O88968	Transcobalamin-2	Tcn2	27.4	27.4	47.585	430	0	45.353	25.6	24	19.3	10.7	11.9	11.9	6802800	8674000	7907800	16695000	1823000	3313100	154870000	131070000	195980000	95447000	102900000	129210000
O89020	Afamin	Afm	17.3	17.3	69.378	608	0	95.891	12.8	13.3	12	12	7.6	6.4	35086000	66709000	39101000	17817000	4824700	3760500	458100000	586590000	332840000	284640000	190350000	165980000
O89053	Coronin-1A;Coronin	Coro1a	20.2	20.2	50.989	461	0	25.376	10.4	15	8.5	11.9	5.2	5.6	1767100	5254900	9661000	9748800	6808500	5773900	1352300000	1885399999.9999998	1755199999.9999998	1778099999.9999998	0	1363800000
P00687	Alpha-amylase 1;Alpha-amylase;Pancreatic alpha-amylase	Amy1;Amy2a1;Amy2	8	8	57.643	511	0	5.8242	0	4.7	0	3.3	0	0	0	4862200	0	1563600	0	0	0	0	0	0	0	0
P00920	Carbonic anhydrase 2	Ca2	47.3	47.3	29.032	260	0	29.304	37.3	30.4	23.5	28.5	36.9	12.7	3215700	43510000	24462000	29935000	6999900	6015400	119590000	103430000	83147000	110220000	242630000	58827000
P01027	Complement C3;Complement C3 beta chain;C3-beta-c;Complement C3 alpha chain;C3a anaphylatoxin;Acylation stimulating protein;Complement C3b alpha chain;Complement C3c alpha chain fragment 1;Complement C3dg fragment;Complement C3g fragment;Complement C3d fragment;Complement C3f fragment;Complement C3c alpha chain fragment 2	C3	76.1	71.4	186.48	1663	0	323.31	71.4	69	72.4	71.9	66.3	69.5	6728099999.999999	5635100000	6661299999.999999	6539899999.999999	4229399999.9999995	5614000000	20874000000	19566000000	19810000000	19776000000	15476000000	20179000000
P01029	Complement C4-B;Complement C4 beta chain;Complement C4 alpha chain;C4a anaphylatoxin;Complement C4 gamma chain	C4b	56.8	56.8	192.91	1738	0	323.31	52.7	50.7	50.3	47.6	42.1	45.1	1464199999.9999998	1361800000	1693799999.9999998	1810399999.9999998	1200700000	1633899999.9999998	8239899999.999999	8013999999.999999	9079000000	9743800000	7955899999.999999	10445000000
P01592	Immunoglobulin J chain	Igj	14.5	14.5	18.013	159	0	35.067	14.5	14.5	9.4	14.5	14.5	9.4	434010000	719100000	309390000	515260000	357250000	305740000	1425300000	2324800000	1538399999.9999998	1475899999.9999998	1685799999.9999998	0
P01632	Ig kappa chain V-I region S107A	Igkv7-33	28.9	21.1	12.717	114	0	89.375	22.8	28.9	22.8	22.8	28.9	14.9	44972000	26779000	40327000	13864000	33701000	9586800	125040000	58627000	107110000	63168000	90192000	0
P01635	Ig kappa chain V-V region K2		40.9	20.9	12.581	115	0	20.099	27.8	20	11.3	40.9	40.9	40.9	71751000	72261000	55486000	204490000	110530000	246750000	255790000	0	0	838060000	842230000	854820000
P01642	Ig kappa chain V-V region L7	Gm10881	23.5	23.5	12.615	115	0	6.0674	13	0	0	23.5	23.5	13	5089400	0	0	609150000	74685000	89335000	0	0	0	1084500000	552390000	0
P01645	Ig kappa chain V-V region HP 93G7;Ig kappa chain V-V region HP R16.7		57.4	0	11.954	108	0	323.31	43.5	43.5	57.4	57.4	50.9	50	572520000	692900000	552540000	2218700000	1842099999.9999998	3298799999.9999995	1772399999.9999998	2060899999.9999998	1187000000	3577599999.9999995	5573900000	7211899999.999999
P01646	Ig kappa chain V-V region HP 123E6		57.4	16.7	11.989	108	0.009311	2.3986	26.9	26.9	40.7	57.4	50.9	33.3	0	0	0	5442100	6101900	0	0	0	0	0	0	0
P01647	Ig kappa chain V-V region HP 124E1		57.4	19.4	11.965	108	0	10.871	24.1	24.1	38	38	31.5	50	0	0	0	0	0	113350000	0	0	0	0	0	0
P01648	Ig kappa chain V-V region HP 91A3;Ig kappa chain V-V regions		38	16.7	11.961	108	0.0020284	2.9567	7.4	7.4	21.3	21.3	31.5	30.6	0	0	0	0	7657400	402400000	0	0	0	0	0	0
P01654	Ig kappa chain V-III region PC 2880/PC 1229;Ig kappa chain V-III region MOPC 70;Ig kappa chain V-III region PC 7132;Ig kappa chain V-III region 50S10.1	Igkv3-2	63.1	46.8	11.98	111	0	6.4393	30.6	16.2	30.6	48.6	16.2	30.6	10258000	0	17400000	30026000	0	44101000	0	0	29685000	0	0	127070000
P01660	Ig kappa chain V-III region PC 3741/TEPC 111		55	9.9	12.099	111	0	180.11	16.2	16.2	38.7	45	39.6	48.6	66582000	64990000	496510000	1221700000	612220000	526220000	591240000	582590000	866470000	4115099999.9999995	3453399999.9999995	4026299999.9999995
P01663	Ig kappa chain V-III region PC 4050;Ig kappa chain V-III region ABPC 22/PC 9245;Ig kappa chain V-III region MOPC 63	Igkv3-10	59.5	16.2	12.005	111	0	26.974	30.6	30.6	53.2	59.5	54.1	53.2	27484000	28914000	62762000	37653000	24041000	23528000	93037000	107170000	147720000	179420000	152160000	288530000
P01666	Ig kappa chain V-III region PC 7183;Ig kappa chain V-III region PC 7043;Ig kappa chain V-III region PC 7210;Ig kappa chain V-III region PC 7769;Ig kappa chain V-III region PC 6308;Ig kappa chain V-III region CBPC 101		53.2	36.9	11.952	111	0	68.865	30.6	53.2	53.2	53.2	53.2	53.2	14475000	107660000	286610000	404110000	159240000	79682000	75044000	226330000	591890000	532960000	395320000	385460000
P01679	Ig kappa chain V-VI region J539;Ig kappa chain V-VI region SAPC 10;Ig kappa chain V-VI region TEPC 601/TEPC 191;Ig kappa chain V-VI region XRPC 24;Ig kappa chain V-VI region XRPC 44	Igkv4-86	37.4	29.9	11.502	107	0	137.2	37.4	16.8	29.9	29.9	16.8	37.4	353930000	48039000	140320000	117070000	0	43112000	431110000	169520000	160570000	326180000	0	262100000
P01741	Ig heavy chain V region		11.4	11.4	12.555	114	0	43.761	0	0	0	11.4	0	0	0	0	0	19250000	0	0	0	0	0	0	0	0
P01749	Ig heavy chain V region 3	Ighv1-61	40.2	34.2	13.016	117	0	12.505	6	6	6	27.4	21.4	18.8	0	0	0	40321000	42901000	5852500	0	0	0	0	0	0
P01754	Ig heavy chain V region 1-62-3;Ig heavy chain V region VH558 B4;Ig heavy chain V region 186-1	Ighv1-62-3	32.5	7.7	12.921	117	0.0021459	3.3977	13.7	13.7	13.7	32.5	13.7	19.7	12537000	33258000	10827000	249150000	376090000	84488000	0	0	0	0	0	0
P01801	Ig heavy chain V-III region J606;Ig heavy chain V-III region ABE-47N;Ig heavy chain V-III region U61;Ig heavy chain V-III region A4;Ig heavy chain V-III region HPC76;Ig heavy chain V region AMPC1		42.6	11.3	12.81	115	0.0021834	3.5091	31.3	31.3	31.3	23.5	31.3	34.8	102460000	105150000	53995000	0	31400000	15610000	0	0	0	0	0	0
Q99JC1	Ig lambda-2 chain C region	Iglc2	45.7	29.5	11.311	105	0	7.2386	30.5	14.3	30.5	14.3	15.2	0	35452000	57913000	56612000	12403000	79844000	0	412330000	0	285560000	0	0	0
P01863	Ig gamma-2A chain C region, A allele;Ig gamma-2A chain C region, membrane-bound form	Ighg;Igh-1a	20.9	12.7	36.389	330	0	110.01	17.6	17.6	17.6	20	17.6	20.9	772550000	1024399999.9999999	827710000	1963599999.9999998	3390599999.9999995	2311900000	1714299999.9999998	2594800000	1910799999.9999998	5016800000	9826400000	7315599999.999999
P01867	Ig gamma-2B chain C region	Igh-3	22	4.7	44.259	404	0	10.993	18.8	16.6	16.6	21.3	22	21.3	14575000	1145300000	350330000	2697100000	3300399999.9999995	1803199999.9999998	0	0	0	20503000000	25239000000	0
P01868	Ig gamma-1 chain C region secreted form;Ig gamma-1 chain C region, membrane-bound form	Ighg1	22.5	7.4	35.704	324	0	26.419	19.1	22.5	22.5	22.5	22.5	15.1	20258000	14689000	9207300	13851000	5402800	0	0	0	0	0	0	0
P01878	Ig alpha chain C region	Igha	21.8	21.8	36.875	344	0	96.329	19.5	19.5	21.8	9	9	9	142170000	159690000	79392000	85862000	75930000	79391000	697330000	671260000	359530000	396000000	610660000	754470000
P01887	Beta-2-microglobulin	B2m	8.4	8.4	13.779	119	0.0059406	2.7647	8.4	8.4	8.4	8.4	0	0	328630000	251390000	340640000	20866000	0	0	0	0	0	0	0	0
P01898	H-2 class I histocompatibility antigen, Q10 alpha chain	H2-Q10	53.2	32	37.251	325	0	194.93	53.2	48	50.2	38.5	28.9	36	568300000	517450000	455870000	170280000	66701000	138090000	1385500000	1245300000	1204700000	667640000	381190000	590720000
P02088	Hemoglobin subunit beta-1	Hbb-b1	95.2	15	15.84	147	0	75.916	80.3	80.3	84.4	69.4	84.4	67.3	4033599999.9999995	3010099999.9999995	3092999999.9999995	3431799999.9999995	5334900000	96212000	20102000000	22691000000	18804000000	20077000000	25054000000	1475799999.9999998
P02089	Hemoglobin subunit beta-2	Hbb-b2	85	40.1	15.878	147	0	129.81	76.2	65.3	74.1	65.3	74.1	56.5	2512800000	2304700000	1699799999.9999998	2734000000	3662999999.9999995	19922000	6113699999.999999	4852500000	3855499999.9999995	5969299999.999999	11134000000	429800000
P02816	Prolactin-inducible protein homolog	Pip	26.7	26.7	16.823	146	0	7.8273	21.2	0	21.2	13.7	0	26.7	7302500	0	2920200	23245000	0	22225000	66771000	0	53532000	66898000	0	107290000
P03921	NADH-ubiquinone oxidoreductase chain 5	Mtnd5	1.5	1.5	68.474	607	1	-2	0	0	1.5	0	0	0	0	0	0	0	0	0	0	0	0	0	0	0
P03953	Complement factor D	Cfd	20.8	20.8	28.057	259	0	21.131	18.1	18.1	18.1	20.8	8.1	8.1	182780000	389440000	8771300	24344000	60515000	66364000	1848599999.9999998	2884200000	743290000	878270000	517110000	447060000
P04202	Transforming growth factor beta-1;Latency-associated peptide	Tgfb1	17.9	17.9	44.309	390	0	9.4439	8.2	5.9	14.6	8.2	10	10.8	6618000	2833600	2324900	3266700	1579600	5964900	46698000	45587000	49009000	47862000	51976000	66063000
P05064	Fructose-bisphosphate aldolase A;Fructose-bisphosphate aldolase	Aldoa	29.1	29.1	39.355	364	0	13.004	3.8	0	5.5	9.6	26.6	6.3	0	0	1151400	3185100	8670000	4168400	0	0	0	0	0	0
P68373	Tubulin alpha-1C chain;Tubulin alpha-1A chain;Tubulin alpha-1B chain;Tubulin alpha-3 chain	Tuba1c;Tuba1a;Tuba1b;Tuba3a	41.4	12	49.909	449	0	287.02	36.3	32.5	34.5	27.8	41.4	21.2	38514000	74696000	61704000	34281000	158360000	17368000	166080000	294450000	246230000	240980000	728370000	171600000
P05366	Serum amyloid A-1 protein	Saa1	40.2	25.4	13.77	122	0	72.54	0	0	0	40.2	18	40.2	0	0	0	530780000	43175000	345240000	0	0	0	1470299999.9999998	0	1696099999.9999998
P06327	Ig heavy chain V region VH558 A1/A4	Gm5629;Ighv1-85	18.8	12.8	12.971	117	0	32.97	12.8	12.8	0	6	6	18.8	7405300	8147400	0	0	0	80944000	0	0	0	0	0	0
P06684	Complement C5;Complement C5 beta chain;Complement C5 alpha chain;C5a anaphylatoxin;Complement C5 alpha chain	C5	48.8	48.8	188.88	1680	0	323.31	41.7	43.2	45.5	40.9	39.1	37.5	274250000	419410000	562770000	368010000	249550000	318580000	1530799999.9999998	1748199999.9999998	2459700000	1757399999.9999998	1816099999.9999998	2526600000
P06728	Apolipoprotein A-IV	Apoa4	77.2	77.2	45.029	395	0	323.31	70.6	74.9	75.4	74.2	68.4	75.4	1805899999.9999998	2303800000	1835099999.9999998	1528799999.9999998	1489799999.9999998	1439700000	4046199999.9999995	3926699999.9999995	3719399999.9999995	3571799999.9999995	4014199999.9999995	4115199999.9999995
P06797	Cathepsin L1;Cathepsin L1 heavy chain;Cathepsin L1 light chain	Ctsl	14.1	14.1	37.547	334	0	8.1477	0	0	0	4.2	14.1	0	0	0	0	0	17855000	0	0	0	0	0	0	0
P07309	Transthyretin	Ttr	67.3	67.3	15.776	147	0	194.64	67.3	56.5	67.3	56.5	40.8	56.5	1945999999.9999998	717570000	1225300000	717800000	259160000	374320000	4156599999.9999995	2835200000	3863299999.9999995	1960099999.9999998	1051799999.9999999	1373600000
P07310	Creatine kinase M-type	Ckm	41.7	41.7	43.044	381	0	44.564	35.7	17.8	16.3	23.4	23.1	0	37601000	3819600	11988000	26703000	30905000	0	267130000	65657000	68914000	181790000	221760000	0
P07361	Alpha-1-acid glycoprotein 2	Orm2	35.7	18.4	23.843	207	0	6.0274	13	13.5	13.5	28.5	17.9	30	0	0	0	121870000	8372300	136470000	0	0	0	620270000	0	857610000
P07724	Serum albumin	Alb	81.1	79.8	68.692	608	0	323.31	67.9	69.9	72.5	54.9	56.7	62	23218000000	28431000000	22266000000	17515000000	18547000000	15917000000	96854000000	103010000000	93969000000	70780000000	84155000000	76325000000
P07759	Serine protease inhibitor A3K	Serpina3k	63.6	21.5	46.879	418	0	323.31	57.9	52.4	58.9	50.2	51.9	53.6	10129000000	13854000000	11239000000	4238699999.9999995	5698500000	4000399999.9999995	17539000000	21766000000	19006000000	8106399999.999999	12639000000	11039000000
P07901	Heat shock protein HSP 90-alpha	Hsp90aa1	35.2	19.2	84.787	733	0	119.95	13	9.4	13.5	26.2	23.6	24.3	10766000	10927000	8344400	61562000	57827000	132520000	58990000	52156000	53706000	238210000	245750000	616210000
P08071	Lactotransferrin	Ltf	3.3	3.3	77.837	707	0	4.1161	0	0	0	0	0	3.3	0	0	0	0	0	1042600	0	0	0	0	0	0
P08113	Endoplasmin	Hsp90b1	17.8	16.3	92.475	802	0	27.559	2.9	3.2	5	8	14.8	8.2	573770	998550	634310	713640	5011700	695160	0	0	0	33200000	93865000	54921000
P08226	Apolipoprotein E	Apoe	63.7	63.7	35.866	311	0	323.31	60.8	63.7	63.7	60.8	60.1	55.3	3547699999.9999995	2857700000	4672200000	3047299999.9999995	1428900000	1548799999.9999998	6816599999.999999	5518000000	7398299999.999999	5406800000	2857600000	4098599999.9999995
P08607	C4b-binding protein	C4bpa;C4bp	16.6	16.6	51.523	469	0	198.53	7.7	7.7	7.7	7.7	7.7	16.6	55877000	35424000	153670000	69527000	46733000	37594000	708440000	1167500000	1212800000	608140000	743160000	612940000
P08905	Lysozyme C-2	Lyz2	10.1	10.1	16.689	148	0.0093985	2.4529	10.1	0	10.1	10.1	10.1	10.1	23013000	0	21864000	8901200	10144000	4597700	0	0	0	0	0	0
P09405	Nucleolin	Ncl	8.1	8.1	76.722	707	0	8.5136	0	0	0	2	0	8.1	0	0	0	409190	0	1834600	0	0	0	0	0	0
P09411	Phosphoglycerate kinase 1;Phosphoglycerate kinase 2	Pgk1;Pgk2	12.2	12.2	44.55	417	0	7.5064	4.3	7.9	3.6	7.9	12.2	0	1523300	5154600	1411400	3168500	9836600	0	0	45399000	0	50494000	86326000	0
P09581	Macrophage colony-stimulating factor 1 receptor	Csf1r	2.8	2.8	109.18	977	0	3.7374	2.8	1.3	0	1.3	1.4	0	1621000	3627900	0	1146700	390320	0	0	0	0	0	0	0
P09813	Apolipoprotein A-II;Proapolipoprotein A-II	Apoa2	66.7	66.7	11.309	102	0	323.31	33.3	33.3	64.7	28.4	66.7	48	665910000	1638499999.9999998	5966999999.999999	1102800000	2253500000	1686699999.9999998	12254000000	14146000000	10988000000	5764000000	3939999999.9999995	3628999999.9999995
P0DP28	Calmodulin-like protein 3	Calml3	17.4	17.4	16.837	149	0.0021142	3.2791	0	11.4	17.4	6	11.4	0	0	5509100	1967200	1644900	14688000	0	0	0	0	0	0	0
P10126	Elongation factor 1-alpha 1	Eef1a1	14.9	14.9	50.113	462	0	12.122	5.6	7.6	7.6	14.9	10.2	7.6	3789700	4597000	3526900	10781000	2385100	1334400	58089000	50835000	48855000	133500000	107440000	50666000
P10605	Cathepsin B;Cathepsin B light chain;Cathepsin B heavy chain	Ctsb	19.5	19.5	37.279	339	0	16.512	19.5	17.1	17.1	11.8	8.6	11.8	39643000	40163000	30890000	22758000	6144200	10423000	184370000	196170000	132200000	164260000	85697000	103390000
P10639	Thioredoxin	Txn	12.4	12.4	11.675	105	0.0059642	2.7675	0	0	0	0	12.4	0	0	0	0	0	3591500	0	0	0	0	0	0	0
Q8CBB6	Histone H2B;Histone H2B type 1-P;Histone H2B type 1-K;Histone H2B type 1-B;Histone H2B type 1-F/J/L;Histone H2B type 3-A;Histone H2B type 3-B;Histone H2B type 1-C/E/G;Histone H2B type 2-B;Histone H2B type 1-H;Histone H2B type 1-M;Histone H2B type 2-E;Histone H2B type 1-A	Hist1h2br;Hist1h2bp;Hist1h2bk;Hist1h2bb;Hist1h2bf;Hist3h2ba;Hist3h2bb;Hist1h2bc;Hist2h2bb;Hist1h2bh;Hist1h2bm;Hist2h2be;Hist1h2ba	38.1	38.1	14.888	134	0	39.807	0	0	0	11.2	17.2	38.1	0	0	0	23286000	20794000	250980000	0	0	0	0	172690000	952650000
P11087	Collagen alpha-1(I) chain	Col1a1	3.2	3.2	138.03	1453	0	18.023	2.2	1.6	3.2	0	0	0	3847100	3704100	6163800	0	0	0	100720000	104360000	123470000	0	0	0
P11152	Lipoprotein lipase	Lpl	7.2	7.2	53.109	474	0	4.0382	3.6	7.2	3.6	0	0	0	4124300	4341900	3887100	0	0	0	0	0	0	0	0	0
P11352	Glutathione peroxidase 1;Glutathione peroxidase	Gpx1	33.8	33.8	22.329	201	0	7.7381	12.9	0	9	15.4	29.4	9	2962900	0	2635300	4681300	21955000	1868200	0	0	0	106540000	121430000	0
P11499	Heat shock protein HSP 90-beta	Hsp90ab1	38.3	20.4	83.28	724	0	71.698	13.1	11	12.2	29.7	20.6	26.8	7472600	8291700	4387900	23744000	18049000	33660000	75355000	69108000	69912000	220250000	213310000	333640000
Q8R1A8	Ornithine carbamoyltransferase, mitochondrial	Otc	3.4	3.4	39.365	351	1	-2	3.4	0	0	3.4	0	0	83604000	0	0	185050000	0	0	0	0	0	0	0	0
P12246	Serum amyloid P-component	Apcs	56.2	56.2	26.247	224	0	192.1	52.2	25.4	50	26.3	42	40.6	610520000	574080000	318660000	1145300000	1022999999.9999999	596650000	3417599999.9999995	3119799999.9999995	2589100000	6587199999.999999	7608499999.999999	7020099999.999999
P12399	Protein CTLA-2-alpha	Ctla2a	41.6	41.6	15.883	137	0	15.648	21.2	35	21.2	32.1	19.7	25.5	19939000	21906000	34096000	46760000	62944000	46045000	138540000	105940000	122300000	142500000	161720000	215540000
P13020	Gelsolin	Gsn	67.2	67.2	85.941	780	0	323.31	53.5	55.9	64	51.7	49.1	50.5	2080499999.9999998	1919599999.9999998	1832999999.9999998	1460399999.9999998	818580000	583810000	8998000000	8882900000	8202599999.999999	6862999999.999999	6120899999.999999	4254799999.9999995
P13609	Serglycin	Srgn	28.9	28.9	16.711	152	0	113.15	18.4	18.4	18.4	28.9	28.9	28.9	279460000	293680000	259580000	105150000	19930000	26127000	661110000	683880000	684560000	957990000	1151100000	1193800000
P14106	Complement C1q subcomponent subunit B	C1qb	36	36	26.717	253	0	188.26	30.4	30.4	20.9	23.7	28.1	15.4	522110000	551630000	442750000	909740000	682670000	729140000	3094099999.9999995	3478899999.9999995	2897500000	5093600000	3681699999.9999995	6438699999.999999
P14847	C-reactive protein	Crp	38.7	38.7	25.36	225	0	176.84	27.6	22.2	28.4	28.4	28	28.9	165800000	102130000	772640000	126070000	630420000	130390000	2483800000	1992399999.9999998	1840199999.9999998	2182900000	2474100000	3383299999.9999995
P16294	Coagulation factor IX;Coagulation factor IXa light chain;Coagulation factor IXa heavy chain	F9	10.4	10.4	52.977	471	0	18.392	7	7	6.8	7	7	10.4	39044000	25182000	32998000	20344000	36717000	68322000	245700000	247750000	256130000	164370000	238540000	364350000
P16301	Phosphatidylcholine-sterol acyltransferase	Lcat	20.8	20.8	49.746	438	0	21.296	16.4	18.5	13.9	11.9	12.1	0	14292000	12411000	17628000	11003000	31614000	0	233050000	228130000	215140000	173260000	256850000	0
P17182	Alpha-enolase	Eno1	47.2	47.2	47.14	434	0	143.53	25.6	26.7	9.4	37.3	37.8	20.3	22297000	16208000	16608000	53799000	81837000	9182900	91429000	71158000	56920000	199670000	328990000	74654000
P17742	Peptidyl-prolyl cis-trans isomerase A;Peptidyl-prolyl cis-trans isomerase A, N-terminally processed	Ppia	34.1	34.1	17.971	164	0	7.4568	15.9	14	0	26.8	27.4	0	12736000	11312000	0	6378700	3059700	0	57290000	0	0	80207000	0	0
P18525	Ig heavy chain V region 5-84		23.1	0	12.872	117	0	34.778	13.7	23.1	13.7	23.1	23.1	13.7	39750000	48086000	26594000	139230000	116150000	99917000	132290000	0	0	509200000	518530000	537430000
P18527	Ig heavy chain V region 914		16.5	16.5	10.661	97	0	8.4209	16.5	16.5	16.5	16.5	16.5	16.5	171000000	159370000	42508000	85650000	195330000	12943000	0	0	0	0	0	0
P18528	Ig heavy chain V region 6.96		53.1	41.8	11.007	98	0	88.504	41.8	53.1	41.8	53.1	52	19.4	272290000	45558000	19648000	225530000	128840000	121250000	1711299999.9999998	1293500000	1206200000	3891399999.9999995	2301200000	5073800000
P18760	Cofilin-1	Cfl1	43.4	39.2	18.559	166	0	17.583	16.9	32.5	28.3	13.9	31.9	13.9	5024500	22126000	12419000	29439000	80687000	17181000	93169000	99763000	108950000	0	229270000	0
P20029	78 kDa glucose-regulated protein	Hspa5	33.1	33.1	72.421	655	0	65.993	9.2	20.3	22	21.2	20.3	21.7	5147400	12321000	14309000	20007000	23062000	27928000	68273000	93701000	83927000	124910000	165030000	125900000
P20918	Plasminogen;Plasmin heavy chain A;Activation peptide;Angiostatin;Plasmin heavy chain A, short form;Plasmin light chain B	Plg	23.9	23.9	90.807	812	0	105.98	14.9	13.3	22.9	17.7	18.1	16.5	622430000	777110000	795120000	847040000	771370000	544040000	4100499999.9999995	4185799999.9999995	4166699999.9999995	4625600000	4872100000	5186600000
P21180	Complement C2;Complement C2b fragment;Complement C2a fragment	C2	32.4	12	84.741	760	0	17.717	23.6	18.9	18.8	22	2.9	7	5907600	4924600	1033500	1681200	0	608120	63999000	60158000	0	0	0	0
P21570	Angiogenin	Ang	20.7	20.7	16.228	145	0.0078431	2.6725	0	7.6	0	0	13.1	0	0	2031800	0	0	217370	0	0	0	0	0	0	0
P21614	Vitamin D-binding protein	Gc	34	34	53.6	476	0	201.25	21.6	28.8	23.5	20.2	17.9	15.8	354670000	625180000	206780000	111070000	116400000	159680000	1978599999.9999998	2286000000	1928999999.9999998	1009999999.9999999	1008699999.9999999	1423600000
P22599	Alpha-1-antitrypsin 1-2	Serpina1b	54.5	21.8	45.974	413	0	323.31	52.1	48.9	54.5	51.1	46	48.2	448970000	626320000	436050000	146100000	148890000	204370000	3472199999.9999995	3751499999.9999995	2682600000	1514999999.9999998	1384800000	1931599999.9999998
P23953	Carboxylesterase 1C	Ces1c	36.6	28	61.055	554	0	189.66	33.4	33.4	28.2	19.1	13.7	15.7	2231800000	2402300000	1467899999.9999998	911330000	644050000	657870000	6201599999.999999	6790999999.999999	4306000000	3036299999.9999995	3150199999.9999995	2797700000
P24270	Catalase	Cat	16.5	16.5	59.795	527	0	12.275	5.1	10.6	3.6	5.1	7.4	0	1945000	1118500	1000900	1420000	881080	0	55860000	53553000	0	0	0	0
P24369	Peptidyl-prolyl cis-trans isomerase B	Ppib	10.2	10.2	23.713	216	0.0097276	2.6107	0	0	0	4.2	6	6	0	0	0	1463300	9205700	2437700	0	0	0	0	0	0
P26039	Talin-1	Tln1	43.6	43.6	269.82	2541	0	323.31	24.6	31	32.4	27.7	37.2	8.7	6668000	21454000	23512000	17548000	64709000	2322500	135740000	247000000	258080000	171900000	699340000	52129000
P26262	Plasma kallikrein;Plasma kallikrein heavy chain;Plasma kallikrein light chain	Klkb1	18.7	18.7	71.382	638	0	123.2	14.7	12.7	14.3	12.5	12.5	12.9	165560000	58295000	130620000	41722000	29217000	88375000	1293300000	1218200000	1182900000	885290000	784800000	626030000
P27612	Phospholipase A-2-activating protein	Plaa	2.1	2.1	87.22	794	0.0078585	2.6764	0	2.1	0	0	0	0	0	7655600	0	0	0	0	0	0	0	0	0	0
P27656	Hepatic triacylglycerol lipase	Lipc	16.5	16.5	57.388	510	0	24.194	12.7	12	12.7	8.2	0	0	23404000	23550000	22243000	7627400	0	0	276750000	294610000	270780000	113980000	0	0
P27773	Protein disulfide-isomerase A3	Pdia3	9.5	9.5	56.678	505	0	6.0999	0	2.4	0	0	9.5	2.6	0	997380	0	0	3230600	538620	0	0	0	0	0	0
P28063	Proteasome subunit beta type-8;Proteasome subunit beta type	Psmb8	22.8	22.8	30.26	276	0	34.351	9.4	9.1	4.7	22.8	13.8	18.8	2824600	4482800	2270400	23723000	14905000	15716000	33925000	29729000	0	113760000	112930000	123140000
P28654	Decorin	Dcn	6.2	6.2	39.809	354	0.0021231	3.3296	3.1	0	3.1	0	6.2	3.1	702680	0	0	0	1554000	844210	0	0	0	0	0	0
P28665	Murinoglobulin-1	Mug1	49.8	28.5	165.3	1476	0	323.31	41.5	43.6	49.5	40.5	41	35.4	986560000	1315900000	2370100000	766780000	871000000	733160000	4222199999.9999995	4705100000	7831699999.999999	3083099999.9999995	4034999999.9999995	3778799999.9999995
P28666	Murinoglobulin-2	Mug2	43.1	23.8	162.38	1451	0	323.31	37.8	41	38.5	32.4	30.2	24.1	83138000	102100000	86674000	28241000	15442000	27095000	1536099999.9999998	1344600000	1674699999.9999998	821060000	723400000	766550000
P29416	Beta-hexosaminidase subunit alpha	Hexa	9.3	9.3	60.612	528	0	5.8161	5.1	2.1	0	0	2.1	0	2319900	868490	0	0	435450	0	0	0	0	0	0	0
P29533	Vascular cell adhesion protein 1	Vcam1	4.1	4.1	81.317	739	0	3.8043	2	4.1	0	2	0	0	465980	1268100	0	774060	0	0	0	0	0	0	0	0
P29699	Alpha-2-HS-glycoprotein	Ahsg	63.5	63.5	37.325	345	0	199.29	36.2	38.3	61.4	20.9	22.9	37.7	2453900000	2602800000	2710900000	1394000000	1407000000	1108100000	13433000000	13264000000	12018000000	7534199999.999999	10521000000	12039000000
P29788	Vitronectin	Vtn	29.7	29.7	54.848	478	0	178.85	25.7	19.7	19.9	19.7	18	21.8	1822399999.9999998	1807599999.9999998	2177500000	1743699999.9999998	989440000	1537899999.9999998	8237599999.999999	7344699999.999999	9417300000	7845099999.999999	6157799999.999999	9187600000
P31532	Serum amyloid A-4 protein	Saa4	50.8	50.8	15.088	130	0	224.01	43.8	50.8	43.8	35.4	43.8	36.9	150930000	145770000	205430000	147060000	188600000	167070000	227150000	241650000	313480000	345800000	481050000	538560000
P31725	Protein S100-A9	S100a9	23	23	13.049	113	0	6.4521	0	0	0	23	0	10.6	0	0	0	9861200	0	24844000	0	0	0	0	0	0
P32261	Antithrombin-III	Serpinc1	63	52.3	52.003	465	0	323.31	56.6	55.1	54.2	46.5	37.6	46.7	563170000	468530000	413030000	263980000	321730000	286010000	3469399999.9999995	3520499999.9999995	2632100000	2535400000	2618600000	3140999999.9999995
P33587	Vitamin K-dependent protein C;Vitamin K-dependent protein C light chain;Vitamin K-dependent protein C heavy chain;Activation peptide	Proc	16.1	16.1	51.818	460	0	131.23	16.1	16.1	16.1	16.1	15.9	15.9	165920000	170750000	264880000	197260000	174640000	230930000	526850000	469030000	839020000	660780000	580800000	925430000
P34928	Apolipoprotein C-I;Truncated apolipoprotein C-I	Apoc1	40.9	40.9	9.6963	88	0	43.068	35.2	28.4	38.6	28.4	18.2	30.7	5276800000	5265500000	3767899999.9999995	2862400000	784210000	2034199999.9999998	4175799999.9999995	3681499999.9999995	2794100000	2845400000	2060199999.9999998	2714000000
P35441	Thrombospondin-1	Thbs1	38.3	22.8	129.65	1170	0	323.31	31.2	28.5	29.4	26	31.6	30.8	1729999999.9999998	1880399999.9999998	2027399999.9999998	1214800000	2419200000	1783399999.9999998	8449599999.999999	8772500000	10655000000	6280799999.999999	13751000000	12931000000
P35582	Hepatocyte nuclear factor 3-alpha	Foxa1	2.1	2.1	48.853	468	1	-2	2.1	2.1	0	0	0	0	3815300	4866600	0	0	0	0	0	0	0	0	0	0
P39039	Mannose-binding protein A	Mbl1	29.7	29.7	25.396	239	0	119.71	19.7	23.4	26.8	20.1	22.6	23	25356000	38230000	39753000	72561000	29280000	21920000	442620000	575570000	627430000	297350000	183070000	168770000
P39876	Metalloproteinase inhibitor 3	Timp3	13.7	13.7	24.182	211	0	10.783	9.5	4.3	13.7	8.1	13.7	13.7	100430000	44439000	75915000	25817000	129860000	93103000	379080000	0	520050000	332510000	806500000	767140000
P40124	Adenylyl cyclase-associated protein 1;Adenylyl cyclase-associated protein	Cap1	22.6	22.6	51.564	474	0	21.54	1.9	1.9	5.9	1.9	18.6	0	771930	639290	772520	1807900	7508300	0	0	0	0	0	0	0
P41317	Mannose-binding protein C	Mbl2	29.9	29.9	25.957	244	0	323.31	29.9	28.3	29.9	25.4	25.4	25.4	2816800000	2359400000	1681499999.9999998	743000000	332160000	304510000	6194099999.999999	4937300000	4036599999.9999995	1871799999.9999998	1188200000	1142800000
P42703	Leukemia inhibitory factor receptor	Lifr	15.3	15.3	122.57	1092	0	198.1	12.8	12.3	14.2	0	0	0	11799000	18719000	8261900	0	0	0	279200000	386260000	248590000	0	0	0
Q8CFZ6	Tetranectin	Clec3b	29.2	29.2	22.255	202	0	50.87	23.3	23.3	23.3	6.9	12.9	5.9	41993000	36259000	32481000	24595000	28359000	7345300	206490000	181980000	98182000	0	0	0
P46412	Glutathione peroxidase 3	Gpx3	36.3	36.3	25.424	226	0	47.097	23.9	30.1	20.8	27	23.9	30.1	697200000	566910000	364320000	587150000	481550000	223970000	1969099999.9999998	1998699999.9999998	1690799999.9999998	2056399999.9999998	2057299999.9999998	1002299999.9999999
P47739	Aldehyde dehydrogenase, dimeric NADP-preferring	Aldh3a1	4	4	50.48	453	0	6.5346	0	2	0	0	2	0	0	0	0	0	0	0	0	0	0	0	0	0
Q5RKN9	F-actin-capping protein subunit alpha-1;F-actin-capping protein subunit alpha-2	Capza1;Capza2	8.7	8.7	32.953	286	0.0091575	2.2518	0	0	0	0	8.7	0	0	0	0	0	5471700	0	0	0	0	0	0	0
P47876	Insulin-like growth factor-binding protein 1	Igfbp1	11.4	11.4	29.57	272	0	14.985	0	0	0	0	11.4	0	0	0	0	0	2819700	0	0	0	0	0	0	0
P47878	Insulin-like growth factor-binding protein 3	Igfbp3	8.9	8.9	31.687	292	0	6.6667	6.2	8.9	3.4	3.4	0	3.4	6355200	13813000	12302000	1889100	0	3776800	95385000	107220000	0	0	0	0
P48744	Norrin	Ndp	10.7	10.7	14.7	131	1	-2	0	0	0	10.7	10.7	0	0	0	0	24385000	16218000	0	0	0	0	0	0	0
P48759	Pentraxin-related protein PTX3	Ptx3	3.4	3.4	41.811	381	0.0021598	3.4476	0	0	0	3.4	3.4	3.4	0	0	0	4237100	782510	981830	0	0	0	0	0	0
P49182	Heparin cofactor 2	Serpind1	31	31	54.496	478	0	71.388	27.2	27.4	25.9	18.6	10.7	16.9	25644000	32521000	8422400	9863500	10481000	23965000	202810000	192360000	222720000	176840000	174100000	236370000
P49722	Proteasome subunit alpha type-2	Psma2	26.1	26.1	25.926	234	0	8.0051	14.1	8.1	15	12	15	0	19101000	8343400	5061200	7950600	2984600	0	0	0	0	0	0	0
P51885	Lumican	Lum	34	34	38.265	338	0	32.44	31.1	34	31.1	24.3	18	8.6	94702000	194260000	111630000	47801000	49469000	30298000	462350000	544550000	364540000	271390000	419750000	262520000
P51910	Apolipoprotein D	Apod	26.5	26.5	21.53	189	0	34.229	20.1	20.1	20.1	26.5	26.5	26.5	80260000	92234000	62481000	568610000	797940000	473220000	635690000	684960000	578450000	1800799999.9999998	2571800000	1639699999.9999998
P52430	Serum paraoxonase/arylesterase 1	Pon1	46.8	46.8	39.565	355	0	241.44	46.8	46.8	40.8	36.9	34.4	13.8	248720000	314950000	178690000	211870000	139950000	14529000	989830000	1032799999.9999999	685090000	706210000	790190000	114240000
P52480	Pyruvate kinase PKM	Pkm	44.6	44.6	57.844	531	0	95.51	24.7	24.9	32.6	33.1	32.2	15.3	19322000	18392000	21309000	62583000	66863000	11322000	154040000	174540000	137420000	347840000	563380000	202460000
P55065	Phospholipid transfer protein	Pltp	28.2	28.2	54.452	493	0	71.434	18.3	25.4	18.3	14.2	15	4.5	25023000	25541000	26667000	6535100	8488900	6270100	186420000	232280000	156300000	76137000	111500000	73981000
P57716	Nicastrin	Ncstn	1.7	1.7	78.491	708	1	-2	0	0	0	0	1.7	0	0	0	0	0	9653700	0	0	0	0	0	0	0
P58252	Elongation factor 2	Eef2	7.5	7.5	95.313	858	0	6.6345	0	0	0	4.7	1.4	2.8	0	0	0	3401100	412970	698930	0	0	0	0	0	0
P59999	Actin-related protein 2/3 complex subunit 4	Arpc4	14.9	14.9	19.667	168	0	3.8476	0	8.3	6.5	6.5	6.5	6.5	0	8752500	1691800	2037900	7013600	1368100	0	0	0	0	0	0
P63260	Actin, cytoplasmic 2;Actin, cytoplasmic 2, N-terminally processed;Actin, cytoplasmic 1;Actin, cytoplasmic 1, N-terminally processed	Actg1;Actb	54.9	21.1	41.792	375	0	323.31	45.9	46.4	46.7	50.9	54.4	28.8	232830000	351760000	285900000	234970000	768250000	223330000	740950000	885000000	881340000	1185200000	3064299999.9999995	1323300000
P61161	Actin-related protein 2	Actr2	5.8	5.8	44.76	394	0.0022026	3.5634	3	3	3	5.8	3	3	3721200	3060000	5637200	7376000	10319000	2428500	0	0	0	0	0	0
P84078	ADP-ribosylation factor 1;ADP-ribosylation factor 3;ADP-ribosylation factor 5;ADP-ribosylation factor 2	Arf1;Arf3;Arf5;Arf2	13.8	13.8	20.697	181	0	3.9151	13.8	8.3	13.8	13.8	13.8	0	5196300	0	4246500	4797300	11306000	0	33715000	0	25601000	36749000	97549000	0
P62259	14-3-3 protein epsilon	Ywhae	13.7	9.8	29.174	255	0.0078278	2.6523	3.9	3.9	3.9	3.9	9	8.6	0	0	0	0	530820	1899000	0	0	0	0	0	0
P62806	Histone H4	Hist1h4a	49.5	49.5	11.367	103	0	26.234	0	0	0	21.4	42.7	49.5	0	0	0	17363000	28980000	339070000	0	0	0	70691000	110630000	861840000
P62827	GTP-binding nuclear protein Ran	Ran;1700009N14Rik	14.4	14.4	24.423	216	0	7.45	9.3	5.1	9.3	14.4	5.1	5.1	7619200	8123500	3159200	17135000	8466200	0	46301000	0	38414000	55848000	0	0
Q5SX49	Profilin;Profilin-1	Pfn1	65.2	65.2	11.82	112	0	38.352	25	39.3	39.3	39.3	65.2	39.3	29355000	112240000	97675000	52788000	411530000	31551000	112610000	195750000	172440000	139680000	582090000	88103000
P63017	Heat shock cognate 71 kDa protein	Hspa8	35.8	35.8	70.87	646	0	40.133	9.9	12.1	8.7	22	24.6	18	3739700	1916900	1756300	6910800	28568000	8766300	62515000	72875000	51900000	111650000	203210000	134490000
P63028	Translationally-controlled tumor protein	Tpt1	8.1	8.1	19.462	172	0.0020576	3.0896	8.1	8.1	8.1	8.1	8.1	0	14779000	19627000	6466500	10571000	8602300	0	0	0	0	0	0	0
P63101	14-3-3 protein zeta/delta	Ywhaz	22	18	27.771	245	0	9.1299	9.8	9.8	9.8	4.1	22	22	8564600	5290900	15831000	3838200	17716000	13343000	0	0	59551000	0	112470000	75505000
P68134	Actin, alpha skeletal muscle;Actin, alpha cardiac muscle 1;Actin, gamma-enteric smooth muscle;Actin, aortic smooth muscle	Acta1;Actc1;Actg2;Acta2	32.6	6.9	42.051	377	0	4.638	21	25.7	26	26	32.1	24.4	0	13161000	54372000	60136000	2470700	67378000	0	0	0	0	0	0
P68372	Tubulin beta-4B chain	Tubb4b	42.2	2.7	49.83	445	0	84.779	33.5	35.7	28.8	26.1	31.9	10.1	15648000	16623000	25910000	33686000	88465000	4698200	129930000	156300000	172850000	190450000	369550000	114290000
P68510	14-3-3 protein eta	Ywhah	17.5	13.4	28.211	246	0	4.8312	4.1	4.1	4.1	4.1	17.5	4.1	0	0	0	0	4079800	0	0	0	0	0	0	0
P70274	Selenoprotein P	Sepp1	31.8	31.8	42.705	380	0	96.059	31.8	31.8	17.1	10.8	5.8	2.9	15736000	19581000	8629600	6481600	23449000	12159000	387530000	377970000	317790000	177670000	250810000	324400000
P70375	Coagulation factor VII;Factor VII light chain;Factor VII heavy chain	F7	14.1	14.1	50.276	446	0	38.063	11	10.3	12.6	14.1	8.3	9.4	49254000	49090000	59793000	42987000	10137000	41095000	283100000	310620000	309730000	256650000	209530000	297990000
P70663	SPARC-like protein 1	Sparcl1	7.2	7.2	72.286	650	0	8.8832	3.8	2	1.8	5.1	0	3.4	3123600	1150400	1010300	3536100	0	907550	57360000	0	0	69097000	0	0
P80314	T-complex protein 1 subunit beta	Cct2	9.9	9.9	57.477	535	0	4.842	0	0	2.8	0	7.1	0	0	0	430720	0	1469900	0	0	0	0	0	0	0
P82198	Transforming growth factor-beta-induced protein ig-h3	Tgfbi	36.9	36.9	74.596	683	0	69.611	20.5	26.1	7.5	15.2	25.6	12.6	10951000	6271200	5943800	10381000	14061000	3829200	94119000	83713000	48913000	83976000	155820000	87394000
P97290	Plasma protease C1 inhibitor	Serping1	32.1	32.1	55.584	504	0	261.34	27.2	25.6	28.8	21.8	22.6	16.7	230350000	227570000	227140000	62496000	66277000	24470000	1999799999.9999998	2237300000	2159500000	1198900000	1083700000	831500000
P97298	Pigment epithelium-derived factor	Serpinf1	41.2	41.2	46.233	417	0	106.22	30	41.2	35.5	18	6.2	16.5	90756000	86112000	116780000	37825000	4442600	31058000	283140000	331470000	312670000	125390000	40902000	148760000
P97333	Neuropilin-1	Nrp1	5.9	5.9	103	923	0	5.918	0	0	2.7	0	1.6	1.5	0	0	1946500	0	0	584030	0	0	0	0	0	0
P97929	Breast cancer type 2 susceptibility protein homolog	Brca2	0.3	0.3	370.66	3329	1	-2	0	0	0	0	0	0.3	0	0	0	0	0	2498800	0	0	0	0	0	0
P98064	Mannan-binding lectin serine protease 1;Mannan-binding lectin serine protease 1 heavy chain;Mannan-binding lectin serine protease 1 light chain	Masp1	19.9	19.9	79.967	704	0	107	18.8	17.5	18.6	17.3	12.5	9.5	73498000	53092000	67955000	52787000	6539200	18048000	786770000	693560000	681730000	480100000	250120000	169560000
P98086	Complement C1q subcomponent subunit A	C1qa	40.4	40.4	25.974	245	0	260.52	29.4	37.6	37.6	40.4	38.8	37.6	840170000	818950000	792370000	1677099999.9999998	1197500000	1737299999.9999998	3227999999.9999995	2763200000	2963699999.9999995	6671799999.999999	5497600000	10122000000
P99024	Tubulin beta-5 chain	Tubb5	35.1	8.8	49.67	444	0	9.7829	23.6	29.1	26.1	23.4	28.6	10.1	8741100	6145100	6411400	7570700	5989600	0	0	0	0	0	0	0
P99026	Proteasome subunit beta type-4	Psmb4	39.4	39.4	29.116	264	0	20.688	11.4	11.4	11.4	31.8	27.3	27.3	28054000	20123000	16278000	42775000	36644000	41566000	114240000	102440000	58152000	162380000	94752000	102980000
Q00612	Glucose-6-phosphate 1-dehydrogenase X;Glucose-6-phosphate 1-dehydrogenase	G6pdx	4.9	4.9	59.262	515	0.004008	2.825	0	0	0	0	4.9	0	0	0	0	0	2269300	0	0	0	0	0	0	0
Q00623	Apolipoprotein A-I;Proapolipoprotein A-I;Truncated apolipoprotein A-I	Apoa1	81.1	81.1	30.615	264	0	323.31	77.7	75.4	78	72	72.7	72	19100000000	21669000000	25315000000	13901000000	23045000000	13031000000	29645000000	32026000000	35266000000	23153000000	44823000000	28348000000
Q00896	Alpha-1-antitrypsin 1-3	Serpina1c	59.2	7.3	45.823	412	0	24.703	58	58	59.2	45.4	37.1	45.4	3189600	5370800	6001200	0	0	0	44740000	56439000	52877000	0	0	0
Q00897	Alpha-1-antitrypsin 1-4	Serpina1d	44.3	12.8	45.998	413	0	165.57	43.1	40	44.3	42.4	33.4	40	40738000	48663000	129120000	18671000	43462000	130780000	1162300000	1019799999.9999999	1513199999.9999998	484770000	1681299999.9999998	1921499999.9999998
Q01149	Collagen alpha-2(I) chain	Col1a2	3.8	3.8	129.56	1372	0	9.8009	1.4	2	3.8	0	0	0	349140	681370	1569300	0	0	0	0	32460000	42571000	0	0	0
Q01279	Epidermal growth factor receptor	Egfr	5	5	134.85	1210	0	24.116	4.1	4.1	5	5	3.2	3.2	10510000	22421000	29432000	3256500	2978900	6959900	223770000	387140000	564770000	79960000	122160000	254690000
Q01339	Beta-2-glycoprotein 1	Apoh	10.7	10.7	38.618	345	0	166.83	7.5	7.5	10.7	7.5	7.5	7.5	140920000	133410000	155880000	88932000	141960000	122960000	926610000	869060000	956360000	796040000	1055999999.9999999	845460000
Q01853	Transitional endoplasmic reticulum ATPase	Vcp	12.9	12.9	89.321	806	0	10.284	6.7	4.2	1.5	9.4	5.1	0	1606600	940000	494450	1477700	752110	0	34994000	27142000	0	31869000	0	0
Q02053	Ubiquitin-like modifier-activating enzyme 1	Uba1	15.1	15.1	117.81	1058	0	22.725	0	4.5	0	4.5	14.1	0	0	898670	0	384370	3459800	0	0	24822000	0	35889000	0	0
Q02105	Complement C1q subcomponent subunit C	C1qc	21.1	21.1	25.991	246	0	323.31	16.3	16.3	16.3	21.1	21.1	21.1	375820000	410020000	358200000	581420000	351470000	687500000	2940399999.9999995	2499700000	2687400000	4702700000	3671999999.9999995	6539999999.999999
Q03311	Cholinesterase	Bche	5.1	5.1	68.461	603	0	45.866	2.7	2.7	0	2.5	5.1	2.5	2977700	2245400	0	2268900	10284000	2477500	0	0	0	0	0	0
Q03734	Serine protease inhibitor A3M	Serpina3m	35.6	13.6	47.064	418	0	6.5678	20.1	20.8	22	18.4	22.7	27.3	0	1586400	0	7938200	15227000	16106000	0	0	0	138260000	167260000	145620000
Q05020	Apolipoprotein C-II	Apoc2	23.7	23.7	10.741	97	0	323.31	23.7	21.6	21.6	21.6	21.6	21.6	425640000	409590000	129710000	121370000	47479000	35281000	1027799999.9999999	923270000	536360000	0	0	0
Q06770	Corticosteroid-binding globulin	Serpina6	38.3	38.3	44.769	397	0	126.03	36.3	36.3	22.9	20.2	18.1	11.1	117890000	117750000	69904000	27643000	8079800	3447400	466730000	418980000	242180000	159100000	96370000	52487000
Q06890	Clusterin;Clusterin beta chain;Clusterin alpha chain	Clu	35.3	35.3	51.655	448	0	323.31	32.8	33.9	35.3	30.4	31.7	31.5	794840000	1038899999.9999999	1657799999.9999998	731760000	808780000	865520000	2107199999.9999998	2228800000	3050999999.9999995	1982499999.9999998	2475500000	2783800000
Q07079	Insulin-like growth factor-binding protein 5	Igfbp5	8.9	8.9	30.372	271	0.0021322	3.3605	8.9	8.9	5.2	0	0	0	5454500	7812700	6067700	0	0	0	53739000	92939000	0	0	0	0
Q07456	Protein AMBP;Alpha-1-microglobulin;Inter-alpha-trypsin inhibitor light chain;Trypstatin	Ambp	15.5	15.5	39.029	349	0	21.638	13.2	12.9	15.2	11.7	11.7	11.7	116760000	128020000	134990000	194480000	175970000	253610000	1436300000	1238400000	1402400000	1947899999.9999998	933520000	3455999999.9999995
Q07797	Galectin-3-binding protein	Lgals3bp	17.9	17.9	64.49	577	0	29.051	13.2	10.6	9.2	3.1	12.5	3.1	21185000	14886000	19509000	8521400	1700300	15161000	163590000	155690000	152250000	0	350180000	0
Q07968	Coagulation factor XIII B chain	F13b	18.7	18.7	76.195	669	0	87.67	12.3	9.7	16	11.1	7.6	10.5	116170000	104610000	105750000	82805000	87193000	90823000	794860000	671500000	842110000	739820000	653290000	688680000
Q08761	Vitamin K-dependent protein S	Pros1	22.4	22.4	74.934	675	0	102.89	16	16.4	22.2	12.1	14.4	13.6	36113000	23531000	47516000	26132000	8272300	27961000	297730000	288170000	348710000	290540000	366180000	395790000
Q08879	Fibulin-1	Fbln1	21.6	21.6	78.032	705	0	53.504	18.3	16.5	14.2	6.8	3	5	39485000	29932000	30572000	6496300	1931500	3996300	375230000	334440000	280330000	172360000	87387000	94170000
Q19LI2	Alpha-1B-glycoprotein	A1bg	39.8	39.8	56.553	512	0	84.362	32	38.5	0	2.3	0	0	560850000	1004299999.9999999	0	1945100	0	0	3171299999.9999995	4964800000	0	0	0	0
Q3B7Z2	Oxysterol-binding protein 1	Osbp	1.6	1.6	88.796	805	1	-2	1.6	0	0	0	0	0	0	0	0	0	0	0	0	0	0	0	0	0
Q3SYK4	Vertnin	Vrtn	1.4	1.4	83.134	740	1	-2	0	0	0	1.4	0	0	0	0	0	0	0	0	0	0	0	0	0	0
Q3TP97		Tars2	5.4	5.4	47.812	423	0.0097087	2.6076	0	0	5.4	0	0	0	0	0	4983900	0	0	0	0	0	0	0	0	0
Q3U2G2	Heat shock 70 kDa protein 4	Hspa4	1.7	1.7	94.208	842	0.0092421	2.3375	0	0	0	1.7	1.7	1.7	0	0	0	303910	1203900	325250	0	0	0	0	0	0
Q3UER8	Fibrinogen gamma chain	Fgg	47	47	50.349	443	0	115.49	34.8	30.5	25.3	40.9	29.3	25.1	34607000	45428000	24578000	152260000	37399000	36566000	223120000	261510000	214090000	1020499999.9999999	423330000	299950000
Q3UHH1	Zinc finger SWIM domain-containing protein 8	Zswim8	0.4	0.4	197.06	1832	1	-2	0	0.4	0	0	0	0	0	9557600	0	0	0	0	0	0	0	0	0	0
Q3V2T4	Keratinocyte differentiation-associated protein	Krtdap	33.3	33.3	11.497	102	0.0021008	3.2491	20.6	12.7	0	0	0	0	19452000	15000000	0	0	0	0	0	0	0	0	0	0
Q61405		Cfhr2	20.1	0	34.498	303	0	3.9799	8.9	8.9	14.5	8.9	12.5	20.1	157740000	58373000	131810000	101750000	92642000	113830000	0	0	0	0	0	0
Q5SVN9		9930111J21Rik2;9930111J21Rik;9930111J21Rik1;Gm5431	12	12	13.011	125	1	-2	12	0	12	12	0	0	8411700	0	8852200	10366000	0	0	0	0	0	0	0	0
Q5ND09		Sept4	3.9	3.9	31.883	280	1	-2	3.9	0	3.9	0	0	0	1264500	0	917520	0	0	0	0	0	0	0	0	0
Q5SX39	Myosin-4;Myosin-1	Myh4;Myh1	0.4	0.4	222.86	1939	1	-2	0	0	0	0	0	0.4	0	0	0	0	0	379140	0	0	0	0	0	0
Q60590	Alpha-1-acid glycoprotein 1	Orm1	43	25.6	23.895	207	0	147.36	34.3	39.1	30.9	34.3	30.9	38.2	51318000	143760000	36233000	442800000	208920000	1113800000	661920000	1293800000	773150000	3213599999.9999995	1832899999.9999998	3117299999.9999995
Q60692	Proteasome subunit beta type-6	Psmb6	12.2	12.2	25.378	238	0	6.694	4.6	0	4.6	4.6	12.2	0	10474000	0	5676000	0	13492000	0	0	0	0	0	0	0
Q60841	Reelin	Reln	2.1	2.1	387.49	3461	0	10.268	2.1	1.7	1.7	1.7	0	0.7	366130	417990	207770	195920	0	265150	46145000	45212000	46242000	47025000	0	0
Q60864	Stress-induced-phosphoprotein 1	Stip1	8.3	8.3	62.581	543	0	4.0934	0	0	0	0	8.3	0	0	0	0	0	1982600	0	0	0	0	0	0	0
Q60963	Platelet-activating factor acetylhydrolase	Pla2g7	23.9	23.9	49.258	440	0	18.273	0	3.2	3.2	13.2	12.3	14.8	0	2644300	0	1406700	50297000	2362800	0	0	0	167020000	407140000	278930000
Q60994	Adiponectin	Adipoq	21.5	21.5	26.809	247	0	18.703	21.5	15.4	9.7	9.7	9.7	9.7	73914000	74523000	27649000	27902000	5193800	2228500	995100000	755850000	328230000	551250000	253320000	123590000
Q61129	Complement factor I;Complement factor I heavy chain;Complement factor I light chain	Cfi	18.9	18.9	67.26	603	0	149.75	14.9	17.6	14.9	14.9	13.6	14.9	97862000	103320000	75787000	93276000	53041000	81320000	664820000	725760000	594420000	521870000	557100000	637040000
Q61171	Peroxiredoxin-2	Prdx2	23.2	23.2	21.778	198	0	12.82	23.2	22.7	17.2	23.2	19.2	0	30532000	23949000	10925000	51453000	21794000	0	124610000	85726000	73575000	140180000	140810000	0
Q61247	Alpha-2-antiplasmin	Serpinf2	38.5	38.5	54.971	491	0	323.31	30.5	34.2	31.2	24.2	22	23.6	105830000	161650000	104420000	88829000	62151000	40857000	638150000	768240000	607220000	624090000	548450000	722850000
Q61268	Apolipoprotein C-IV	Apoc4	16.1	16.1	14.288	124	0	40.015	16.1	16.1	16.1	16.1	16.1	16.1	615040000	635050000	539010000	445880000	195590000	297360000	909730000	804770000	726730000	622640000	441830000	540970000
Q61406		Cfhr1	5.8	5.8	38.443	343	0	11.35	5.8	5.8	5.8	5.8	5.8	5.8	49615000	59292000	2351100	71645000	65032000	57802000	488790000	472100000	110560000	355100000	449790000	512950000
Q61508	Extracellular matrix protein 1	Ecm1	22	22	62.832	559	0	89.746	8.6	4.1	8.6	22	8.6	2.5	25000000	14075000	23962000	48396000	9953100	7348700	158950000	122210000	145090000	300270000	164860000	0
Q61646	Haptoglobin;Haptoglobin alpha chain;Haptoglobin beta chain	Hp	35.7	35.7	38.752	347	0	228.13	0	3.5	0	30.3	9.5	35.7	0	1059500	0	1774999999.9999998	7723400	4874400000	0	0	0	4704900000	31211000	13967000000
Q61702	Inter-alpha-trypsin inhibitor heavy chain H1	Itih1	50.6	50.6	101.07	907	0	323.31	41.7	46.6	41.8	33.2	23.3	29.5	277790000	278560000	380050000	186830000	88634000	167050000	1946599999.9999998	1975699999.9999998	2178000000	1490899999.9999998	980710000	1530899999.9999998
Q61704	Inter-alpha-trypsin inhibitor heavy chain H3	Itih3	46.6	46.6	99.357	889	0	323.31	34.9	43.9	33.7	28	28.5	29.6	55887000	97445000	115470000	298690000	258480000	362140000	939690000	1154600000	1101300000	2616500000	2852900000	4043099999.9999995
Q61771	Kinesin-like protein KIF3B;Kinesin-like protein KIF3B, N-terminally processed	Kif3b	1.1	1.1	85.287	747	1	-2	0	1.1	0	0	0	0	0	0	0	0	0	0	0	0	0	0	0	0
Q61805	Lipopolysaccharide-binding protein	Lbp	28.7	28.7	53.055	481	0	75.816	23.1	19.8	14.8	18.3	16	17.7	28555000	32898000	30294000	57554000	51186000	77709000	149180000	179260000	146850000	278550000	299670000	349450000
Q61838	Alpha-2-macroglobulin;Alpha-2-macroglobulin 165 kDa subunit;Alpha-2-macroglobulin 35 kDa subunit	A2m	49.2	48.2	165.85	1495	0	323.31	42.7	43.3	38.5	33.9	33.4	37.2	1174400000	1627799999.9999998	1160900000	949140000	1140000000	1559599999.9999998	5834099999.999999	7487499999.999999	5925699999.999999	5582800000	6735499999.999999	8144399999.999999
Q62009	Periostin	Postn	25.5	25.5	93.142	838	0	30.916	13.4	16.6	10	7	8.9	3.6	4625900	4739500	1890100	3560700	5747800	1087200	88459000	95708000	77800000	76114000	96797000	0
Q62383	Transcription elongation factor SPT6	Supt6h	0.9	0.9	199.08	1726	1	-2	0	0	0.9	0	0	0	0	0	893440	0	0	0	0	0	0	0	0	0
Q63918	Serum deprivation-response protein	Sdpr	6	6	46.763	418	0	3.7178	0	0	3.8	0	6	0	0	0	3435800	0	14239000	0	0	0	0	0	0	0
Q64697	Protein tyrosine phosphatase receptor type C-associated protein	Ptprcap	4.1	4.1	20.37	197	1	-2	0	0	4.1	0	0	0	0	0	0	0	0	0	0	0	0	0	0	0
Q64726	Zinc-alpha-2-glycoprotein	Azgp1	41.4	41.4	35.332	307	0	69.25	39.7	39.7	39.7	32.9	39.4	30.3	141180000	177780000	162780000	180630000	248070000	112230000	471330000	503760000	521130000	447970000	746550000	605760000
Q64727	Vinculin	Vcl	15.6	15.6	116.72	1066	0	22.829	0	0.9	2.1	0.9	15.6	1.2	0	332880	823190	315570	8538300	232640	0	0	9168100	0	129200000	0
Q66VB7		Gm1553	22.3	22.3	10.459	94	0	4.0615	12.8	12.8	22.3	0	0	0	43998000	8472200	77485000	0	0	0	0	0	0	0	0	0
Q6IRU2	Tropomyosin alpha-4 chain	Tpm4	47.2	41.5	28.467	248	0	34.235	26.2	38.7	35.5	24.6	44	8.9	10636000	39360000	29685000	2191600	49453000	2019900	42763000	93828000	90158000	21381000	250420000	21485000
Q6NZQ4	PAX-interacting protein 1	Paxip1	0.9	0.9	119.27	1056	1	-2	0	0.9	0.9	0	0	0	0	1279400	1014500	0	0	0	0	0	0	0	0	0
Q6PG95	Protein cramped-like	Cramp1l	0.8	0.8	137.12	1285	1	-2	0.8	0	0	0	0	0	85139	0	0	0	0	0	0	0	0	0	0	0
Q6S9I0		Kng2	21.2	4.2	47.887	433	0	26.915	8.5	13.4	8.5	13.4	16.9	17.8	152630000	101670000	116530000	220950000	222600000	440990000	783200000	733490000	690790000	1397500000	1631199999.9999998	2670000000
Q9QXC1	Fetuin-B	Fetub	31.7	31.7	42.712	388	0	45.526	25.8	23.5	20.9	17.8	9.5	9.5	12519000	54541000	13569000	50111000	33594000	27373000	306540000	398760000	336420000	441930000	568460000	686060000
Q6ZQ38	Cullin-associated NEDD8-dissociated protein 1	Cand1	2	2	136.33	1230	0.0020408	2.9839	0	0	0	0.8	2	0	0	0	0	404230	1140500	0	0	0	0	0	0	0
Q792Z0		Prss3	4.1	4.1	26.183	246	0	3.9477	4.1	4.1	4.1	4.1	4.1	4.1	1178800000	1319400000	1487599999.9999998	960830000	977470000	977270000	0	0	0	0	0	0
Q7TMM9	Tubulin beta-2A chain;Tubulin beta-2B chain	Tubb2a;Tubb2b	42.2	12.1	49.906	445	0	24.046	21.3	25.6	32.1	23.4	28.5	12.8	0	2523600	16844000	2068300	10888000	1317100	0	0	126330000	0	251390000	0
Q80WS1	Beta-citrylglutamate synthase B	Rimklb	5.7	5.7	42.528	387	1	-2	0	0	5.7	5.7	0	0	0	0	301450000	233850000	0	0	0	0	0	0	0	0
Q80YC5	Coagulation factor XII;Coagulation factor XIIa heavy chain;Coagulation factor XIIa light chain	F12	15.6	15.6	65.701	597	0	53.78	14.2	12.9	12.9	14.2	13.2	7.2	76416000	44094000	48660000	53601000	69886000	31893000	813320000	743250000	699670000	478700000	327280000	376650000
Q80YX1	Tenascin	Tnc	18.3	18.3	231.8	2110	0	77.419	17.4	7.6	7.7	3.5	0	1.9	5734700	595870	428290	245370	0	330780	280430000	51458000	76442000	35739000	0	12829000
Q8BFZ3	Beta-actin-like protein 2	Actbl2	28.2	9	42.004	376	0.0078895	2.7155	15.2	19.9	15.2	15.2	19.1	13.3	0	29293000	0	0	0	12759000	0	0	0	0	0	0
Q8BH35	Complement component C8 beta chain	C8b	36.7	36.7	66.229	589	0	270.85	29.2	31.6	31.1	24.8	19.5	25.8	208730000	254860000	903330000	208830000	109150000	180560000	3064699999.9999995	3066099999.9999995	7121299999.999999	2087499999.9999998	1619599999.9999998	2303700000
Q8BH61	Coagulation factor XIII A chain	F13a1	34	34	83.206	732	0	130.21	16.9	18.6	18.3	30.9	18	9.2	37434000	33268000	25912000	89678000	19486000	7484500	191190000	190570000	126690000	496190000	144750000	75765000
Q8BND5	Sulfhydryl oxidase 1	Qsox1	25.1	25.1	82.784	748	0	166.93	21	24.1	19.8	17.5	20.7	18.3	39401000	57463000	74895000	46104000	48311000	54436000	290670000	376570000	357590000	349490000	400200000	509860000
Q8BPB5	EGF-containing fibulin-like extracellular matrix protein 1	Efemp1	17.8	17.8	54.952	493	0	25.531	9.7	5.5	9.7	16.2	3.9	8.1	7645300	6684500	6264600	4063200	3808300	2231400	81386000	58206000	74171000	73080000	63702000	65212000
Q8C165	Probable carboxypeptidase PM20D1	Pm20d1	5	5	55.662	503	0.0094518	2.5197	0	0	5	0	0	0	0	0	1336000	0	0	0	0	0	0	0	0	0
Q8C7G5	Apolipoprotein A-V	Apoa5	49.7	49.7	41.262	368	0	32.481	26.6	9.2	28.3	20.9	23.6	18.2	1633600	1043000	2875900	6967000	5258000	1539100	84594000	39701000	68177000	73058000	60576000	47749000
Q8CAG6	Pleckstrin	Plek	29.4	29.4	37.154	327	0	93.293	29.4	25.4	25.4	21.1	25.4	11.6	4152100	98574000	3031000	14803000	10715000	6321200	180200000	306220000	367030000	140310000	661560000	70189000
Q8CG16	Complement C1r-A subcomponent;Complement C1r-A subcomponent heavy chain;Complement C1r-A subcomponent light chain;Complement C1r-B subcomponent;Complement C1r-B subcomponent heavy chain;Complement C1r-B subcomponent light chain	C1ra;C1rb	31.3	31.3	80.072	707	0	275.77	26.7	28.4	29.8	27	23.6	26.4	128220000	80289000	106430000	151910000	75673000	88512000	936290000	809110000	806410000	1094700000	702730000	1004099999.9999999
Q8CIE0	Serpin A11	Serpina11	9	9	47.188	424	0	6.0032	5.7	3.5	9	2.1	0	0	6625900	3951700	5984200	2734700	0	0	37399000	0	47669000	0	0	0
Q8CIH5	1-phosphatidylinositol 4,5-bisphosphate phosphodiesterase gamma-2	Plcg2	1.8	1.8	147.59	1265	0	5.4327	0	0	0	0	1.8	0	0	0	0	0	167070	0	0	0	0	0	0	0
Q8HWB2		H2-Q4	21.2	2.3	39.617	354	0	9.3358	12.4	12.4	13.6	9.6	17.2	15	6466800	4948300	6939500	6057100	18039000	7018700	0	0	0	0	157960000	59444000
Q8K0E8	Fibrinogen beta chain;Fibrinopeptide B;Fibrinogen beta chain	Fgb	48.4	48.4	54.752	481	0	323.31	30.4	37.2	36.8	48.4	36.6	37.8	62555000	70053000	55051000	378510000	112720000	60526000	250510000	261090000	184350000	1042299999.9999999	479870000	349660000
Q8K1B8	Fermitin family homolog 3	Fermt3	42.1	42.1	75.634	665	0	121.85	8	29	27.2	20.8	32.2	15.3	7376000	22043000	29729000	7387300	51175000	8868200	67805000	116750000	136090000	82916000	381430000	72942000
Q8K1I3	Secreted phosphoprotein 24	Spp2	27.6	27.6	23.136	203	0	14.898	10.3	20.7	19.2	12.8	20.7	20.7	73750000	154650000	164780000	73289000	134670000	154980000	874270000	591730000	678490000	653410000	661130000	844040000
Q8R121	Protein Z-dependent protease inhibitor	Serpina10	51.3	51.3	51.797	448	0	253.61	45.3	47.5	44.2	33.3	30.8	24.6	195490000	205750000	279600000	185380000	66016000	248880000	997510000	1011899999.9999999	1509799999.9999998	859480000	801990000	1560299999.9999998
Q8VCG4	Complement component C8 gamma chain	C8g	59.9	59.9	22.508	202	0	323.31	49.5	56.4	59.9	41.1	41.1	41.1	367080000	470050000	1270700000	242020000	134150000	206940000	1401000000	1518199999.9999998	3517799999.9999995	934930000	614910000	1021399999.9999999
Q8VCS0	N-acetylmuramoyl-L-alanine amidase	Pglyrp2	25.3	25.3	57.706	530	0	25.706	4.7	11.5	2.1	9.6	7.9	11.3	4854900	6792000	7799500	4571900	13039000	13356000	0	0	0	66219000	194600000	151870000
Q8VCU2	Phosphatidylinositol-glycan-specific phospholipase D	Gpld1	39.9	39.9	93.622	842	0	257.18	32.1	34.6	30.9	28.7	26.2	13.8	56539000	65913000	62461000	71606000	116210000	19600000	614900000	682570000	559710000	586180000	718720000	598610000
Q8VDD5	Myosin-9	Myh9	38.6	37.3	226.37	1960	0	323.31	14.6	23.3	28.2	24.4	31.6	14.8	4376900	11813000	21277000	16876000	42610000	10370000	86267000	123500000	201200000	157440000	497370000	191010000
Q8VF49	Olfactory receptor	Olfr1289	2.3	2.3	33.624	298	1	-2	0	0	0	0	0	2.3	0	0	0	0	0	0	0	0	0	0	0	0
Q8VI56	Low-density lipoprotein receptor-related protein 4	Lrp4	0.8	0.8	211.95	1905	0.0093809	2.4404	0	0	0	0.8	0.8	0.8	0	0	0	2015800	945110	1534400	0	0	0	0	0	0
Q91VB8	Hemoglobin subunit alpha	haemaglobin alpha 2;Hba	71.8	65.5	15.112	142	0	263.67	71.8	71.8	69	69	71.1	43	11112000000	8951200000	6359399999.999999	9717700000	12383000000	348780000	34628000000	31740000000	24154000000	28239000000	41496000000	2050999999.9999998
Q91WP0	Mannan-binding lectin serine protease 2;Mannan-binding lectin serine protease 2 A chain;Mannan-binding lectin serine protease 2 B chain	Masp2	23.8	23.8	75.516	685	0	63.588	19.3	14.3	15.6	10.2	10.2	12.6	34520000	29766000	30252000	20941000	20749000	18585000	278820000	256890000	257000000	216680000	244980000	229120000
Q91WP6	Serine protease inhibitor A3N	Serpina3n	44	33	46.717	418	0	323.31	43.5	36.4	43.8	40.7	40.9	38.8	371570000	342360000	300560000	598720000	754400000	658610000	1083700000	1036499999.9999999	1050699999.9999999	1662699999.9999998	3053299999.9999995	3175999999.9999995
Q91X72	Hemopexin	Hpx	45	45	51.317	460	0	323.31	31.1	31.1	33.7	29.8	37	35.4	411800000	642470000	647970000	1482199999.9999998	1969599999.9999998	2678400000	2834700000	3836999999.9999995	3138899999.9999995	7326199999.999999	9964400000	15650000000
Q91XL1		Lrg1	15.2	15.2	37.431	342	0	14.198	7	15.2	15.2	10.2	15.2	13.2	26308000	62285000	41335000	103700000	140260000	177160000	117180000	165340000	201820000	384000000	619370000	985770000
Q91Y47	Coagulation factor XI;Coagulation factor XIa heavy chain;Coagulation factor XIa light chain	F11	8.5	8.5	69.788	624	0	12.609	6.7	3	8.5	8.5	0	3	3829800	6780500	9581400	3131300	0	3587100	105120000	108060000	124740000	90305000	0	96258000
Q91YW3	DnaJ homolog subfamily C member 3	Dnajc3	2.2	2.2	57.463	504	1	-2	0	2.2	0	0	0	0	0	0	0	0	0	0	0	0	0	0	0	0
Q921I1	Serotransferrin	Tf	54.8	52.4	76.723	697	0	323.31	38.9	42.6	46.3	41.6	40.7	42.5	4841100000	5674700000	4758700000	4060599999.9999995	3704999999.9999995	4755500000	12541000000	14817000000	12581000000	12616000000	12801000000	17371000000
Q922B2	Aspartate--tRNA ligase, cytoplasmic	Dars	6.2	6.2	57.147	501	0	3.7251	0	4	0	0	6.2	0	0	511770	0	0	618490	0	0	0	0	0	0	0
Q922F4	Tubulin beta-6 chain	Tubb6	16.1	3.8	50.09	447	0	30.759	5.8	12.3	9.6	3.1	8.9	4	0	0	3492000	0	0	0	0	0	0	0	0	0
Q922R8	Protein disulfide-isomerase A6	Pdia6	6.6	6.6	48.1	440	0.0021505	3.4127	0	3.4	0	0	6.6	0	0	1828100	0	0	4252100	0	0	0	0	0	0	0
Q99JI6	Ras-related protein Rap-1b	Rap1b	38.6	8.2	20.825	184	0	22.784	25	38.6	38.6	26.1	30.4	0	10172000	69274000	57275000	21089000	113890000	0	82995000	146560000	138240000	71630000	337160000	0
Q99PP2	Zinc finger protein 318	Znf318	0.8	0.8	246.32	2237	0.0095969	2.5792	0.4	0	0	0.4	0	0.8	1212300	0	0	612600	0	614900	0	0	0	0	0	0
Q99PT1	Rho GDP-dissociation inhibitor 1	Arhgdia	15.2	15.2	23.407	204	0.0092937	2.3904	0	0	0	0	15.2	0	0	0	0	0	3061700	0	0	0	0	0	0	0
Q9CQ19	Myosin regulatory light polypeptide 9	Myl9;Myl12a	40.1	12.2	19.854	172	0	70.332	5.8	22.1	28.5	28.5	40.1	22.7	2725600	23938000	46440000	29369000	132780000	27620000	0	64721000	106240000	77792000	303370000	101320000
Q9CQW3	Vitamin K-dependent protein Z	Proz	20.8	20.8	44.304	399	0	118.21	19	14.3	19	13.8	7.3	12	549980000	506910000	630010000	516450000	350560000	535710000	2803900000	2337200000	3066199999.9999995	2744900000	3281899999.9999995	4274099999.9999995
Q9CR55	UPF0547 protein C16orf87 homolog		9.1	9.1	17.829	154	1	-2	0	9.1	0	0	0	0	0	4705100	0	0	0	0	0	0	0	0	0	0
Q9CWJ9	Bifunctional purine biosynthesis protein PURH;Phosphoribosylaminoimidazolecarboxamide formyltransferase;IMP cyclohydrolase	Atic	7.4	7.4	64.217	592	0	5.1501	0	0	0	4.6	5.2	0	0	0	0	1016100	1743400	0	0	0	0	0	0	0
Q9D020	Cytosolic 5-nucleotidase 3A	Nt5c3a	8.2	8.2	37.252	331	0.0078125	2.6287	0	0	0	4.8	3.3	0	0	0	0	498680	779970	0	0	0	0	0	0	0
Q9D0F6	Replication factor C subunit 5	Rfc5	4.7	4.7	38.096	339	1	-2	4.7	4.7	4.7	4.7	0	0	66710000	70421000	46107000	65234000	0	0	0	0	0	0	0	0
Q9D1A2	Cytosolic non-specific dipeptidase	Cndp2	10.3	10.3	52.767	475	0	7.9668	2.5	6.7	4.2	0	10.3	0	528920	1086800	865760	0	2658000	0	0	20516000	0	0	45690000	0
Q9D1E1		Ifi27	9.8	9.8	20.355	215	0.0040323	2.9053	0	0	0	9.8	0	0	0	0	0	61818000	0	0	0	0	0	0	0	0
Q9D3H2		Obp1a	35	30.1	18.469	163	0	17.845	35	9.2	0	30.1	20.9	25.8	15756000	3636100	0	29988000	9395500	131210000	84189000	0	0	86427000	74227000	377310000
Q9D410		Dmrtc1c1	3.8	3.8	25.717	238	1	-2	3.8	0	0	3.8	0	3.8	2604000000	0	0	1492999999.9999998	0	1705699999.9999998	0	0	0	0	0	0
Q9DAU9	Zinc finger protein 654	Znf654	1.5	1.5	126.44	1112	1	-2	0	0	1.5	0	0	0	0	0	8600400	0	0	0	0	0	0	0	0	0
Q9DBB9	Carboxypeptidase N subunit 2	Cpn2	25.4	25.4	60.478	547	0	215.87	23.2	24.1	24.1	21	17.4	19	196360000	270920000	211270000	143620000	148330000	101670000	544040000	743710000	537190000	454440000	605230000	495630000
Q9DBD0	Inhibitor of carbonic anhydrase	Ica;1300017J02Rik	29.7	29.7	76.765	700	0	269.73	24.7	28.7	23.1	21.6	17.3	19.4	60518000	89564000	74267000	32208000	47950000	34060000	393200000	514520000	422700000	287860000	414850000	393470000
Q9EQ41		Vmn1r29	3.6	3.6	35.061	303	1	-2	0	0	3.6	0	0	0	0	0	0	0	0	0	0	0	0	0	0	0
Q9EQI5		Ppbp	19.5	19.5	12.251	113	0	10.657	19.5	19.5	19.5	9.7	9.7	9.7	576120000	535580000	669190000	346470000	822980000	712680000	1217900000	752210000	2695100000	0	0	0
Q9EQP2	EH domain-containing protein 4	Ehd4	9.6	7.6	61.48	541	0	9.5477	0	4.8	4.8	2	9.6	0	0	4371700	4956600	868860	19246000	0	0	42662000	47521000	0	152580000	0
Q9JHH6	Carboxypeptidase B2	Cpb2	33.4	25.4	48.87	422	0	176.19	28	26.3	23.9	24.2	14	14	46363000	33575000	79795000	38054000	23226000	31217000	725970000	695210000	840270000	715780000	442330000	730270000
Q9JHX2	Transcription factor Sp5	Sp5	2	2	42.052	398	1	-2	0	0	0	2	0	0	0	0	0	5413400	0	0	0	0	0	0	0	0
Q9JJA9	General receptor for phosphoinositides 1-associated scaffold protein	Grasp	2.8	2.8	42.337	392	1	-2	0	0	2.8	0	0	0	0	0	9565100	0	0	0	0	0	0	0	0	0
Q9JJN5	Carboxypeptidase N catalytic chain	Cpn1	50.8	50.8	51.845	457	0	235.93	50.5	50.5	47.5	50.5	47.3	31.9	121380000	189450000	173670000	111930000	135740000	81397000	671720000	657360000	605460000	569600000	593960000	488070000
Q9JKN6	RNA-binding protein Nova-1	Nova1	2.4	2.4	51.755	507	0	5.1021	2.4	0	2.4	2.4	0	0	0	0	3324000	0	0	0	0	0	0	0	0	0
Q9JLZ6	Hypermethylated in cancer 2 protein	Hic2	7.6	7.6	66.766	619	0.0021186	3.2962	3.4	4.2	4.2	3.4	0	0	74417000	65217000	73389000	14448000	0	0	0	0	0	0	0	0
Q9QUM0	Integrin alpha-IIb;Integrin alpha-IIb heavy chain;Integrin alpha-IIb light chain	Itga2b	5.5	5.5	112.68	1033	0	5.552	3.6	1.3	1.3	0	3.2	0	459330	390100	1320600	0	1549500	0	0	0	0	0	0	0
Q9QUM9	Proteasome subunit alpha type-6	Psma6	21.1	21.1	27.372	246	0	9.2127	7.3	0	0	17.5	8.5	10.2	6028000	0	0	6777500	1610800	6691700	0	0	0	99371000	0	123680000
Q9QWK4	CD5 antigen-like	Cd5l	10.5	10.5	38.862	352	0	25.052	10.5	10.5	10.5	10.5	10.5	8	78844000	122910000	52675000	81487000	60142000	68026000	670850000	993390000	631750000	948210000	743960000	1151600000
Q9QXY6	EH domain-containing protein 3	Ehd3	7.7	5.6	60.82	535	0.0079051	2.7389	0	0	0	2.1	4.3	3.4	0	0	0	0	954490	843170	0	0	0	0	0	0
Q9QYZ4	Sperm motility kinase 1	Smok1	2.9	2.9	54.793	484	1	-2	0	2.9	2.9	0	0	0	0	45374000	20572000	0	0	0	0	0	0	0	0	0
Q9QZ25	Vascular non-inflammatory molecule 3	Vnn3	13	13	56.304	500	0	119.2	6.4	6.4	6.4	6.4	13	11	2913200	1626900	1283700	4612300	25933000	21918000	67677000	66955000	62141000	110160000	244270000	185540000
Q9QZU3	Platelet glycoprotein V	Gp5	15.9	15.9	63.381	567	0	19.224	9.7	15.9	11.6	3.4	5.6	5.6	12599000	5130400	4002800	2148300	4715500	3640000	107420000	149220000	96127000	53791000	98061000	83691000
Q9R098	Hepatocyte growth factor activator;Hepatocyte growth factor activator short chain;Hepatocyte growth factor activator long chain	Hgfac	3.7	3.7	70.567	653	0	4.5891	3.7	3.7	3.7	3.7	1.8	0	14218000	17770000	14800000	15398000	2989900	0	0	206230000	160000000	150030000	0	0
Q9R0E2	Procollagen-lysine,2-oxoglutarate 5-dioxygenase 1	Plod1	9.5	9.5	83.594	728	0	6.127	2.2	2.5	0	1.5	3.3	0	1365400	1834800	0	398420	455740	0	0	0	0	0	0	0
Q9R0G6	Cartilage oligomeric matrix protein	Comp	7.2	5.8	82.341	755	0	6.6057	4.1	7.2	4.5	3	0	3.2	3532000	4340800	5500500	3104700	0	1617400	77495000	44799000	66738000	0	0	0
Q9R0P5	Destrin	Dstn	28.5	24.2	18.521	165	0	15.939	16.4	16.4	20.6	16.4	24.2	0	5493400	14757000	6018700	9387600	33703000	0	32383000	43993000	33564000	40342000	131360000	0
Q9R1E6	Ectonucleotide pyrophosphatase/phosphodiesterase family member 2	Enpp2	4.2	4.2	98.884	862	0	6.6791	2.7	1.4	2.7	0	1.4	1.5	3642600	2126700	6470700	0	587170	766870	41163000	0	72226000	0	0	0
Q9R1P0	Proteasome subunit alpha type-4;Proteasome subunit alpha type	Psma4	6.9	6.9	29.47	261	0	3.9542	3.8	3.8	3.8	3.8	3.8	6.9	9262200	8955300	7753900	15038000	14742000	5531100	0	0	0	0	0	0
Q9R1P1	Proteasome subunit beta type-3	Psmb3	30.7	30.7	22.965	205	0	9.8906	8.8	8.8	8.8	16.1	22.9	30.7	4824500	6387700	6392400	25875000	6020300	9676600	0	0	0	85693000	79009000	68372000
Q9R1P3	Proteasome subunit beta type-2	Psmb2	13.4	13.4	22.906	201	0	3.7881	0	0	0	13.4	5	5	0	0	0	17839000	9303200	6343200	0	0	0	0	0	0
Q9R1P4	Proteasome subunit alpha type-1	Psma1	31.2	31.2	29.546	263	0	12.725	17.1	15.2	22.8	17.9	17.9	17.1	5631900	827540	1768700	4290600	8557500	7066900	75208000	63804000	25741000	64476000	75382000	82213000
Q9R1T4	Septin-6	Sept6	3.7	3.7	49.619	434	1	-2	0	0	3.7	0	0	0	0	0	864360000	0	0	0	0	0	0	0	0	0
Q9R216	Frizzled-9	Fzd9	2.5	2.5	64.994	592	1	-2	0	2.5	0	0	0	0	0	2434300	0	0	0	0	0	0	0	0	0	0
Q9WVJ3	Carboxypeptidase Q	Cpq	35.3	35.3	51.813	470	0	24.938	12.6	23	17.7	20.4	17.4	2.3	27539000	10624000	17138000	8407100	3159300	1429100	118970000	98308000	81033000	0	84016000	0
Q9WVK4	EH domain-containing protein 1	Ehd1	4.7	4.7	60.602	534	0.002193	3.5366	0	0	0	0	4.7	0	0	0	0	0	1460500	0	0	0	0	0	0	0
Q9Z126	Platelet factor 4	Pf4	31.4	31.4	11.243	105	0	29.92	20	31.4	31.4	17.1	17.1	28.6	5241500000	6081099999.999999	6370999999.999999	2806700000	1888499999.9999998	1713599999.9999998	9475900000	9199700000	10812000000	7052499999.999999	11581000000	10689000000
Q9Z1Q5	Chloride intracellular channel protein 1	Clic1	11.2	11.2	27.013	241	0	6.3132	0	0	0	11.2	0	0	0	0	0	2813500	0	0	0	0	0	0	0	0
Q9Z1R3	Apolipoprotein M	Apom	8.4	8.4	21.273	190	0	3.9641	8.4	8.4	8.4	4.2	8.4	4.2	77675000	136300000	77121000	35676000	123760000	28788000	599270000	489540000	488040000	0	513710000	0
Q9Z1T2	Thrombospondin-4	Thbs4	9.2	8.2	106.37	963	0	96.136	8.2	8.5	8.5	8.5	4.4	7.5	35331000	41451000	43669000	22943000	5120900	8027100	454720000	357680000	399170000	274780000	289280000	235950000
Q9Z277	Tyrosine-protein kinase BAZ1B	Baz1b	0.7	0.7	170.65	1479	1	-2	0	0	0.7	0	0	0	0	0	0	0	0	0	0	0	0	0	0	0
Q9Z282	Probable G-protein coupled receptor 132	Gpr132	2.6	2.6	42.652	382	1	-2	0	0	0	2.6	0	0	0	0	0	0	0	0	0	0	0	0	0	0
Q9Z2U0	Proteasome subunit alpha type-7;Proteasome subunit alpha type-7-like;Proteasome subunit alpha type	Psma7;Psma8	36.3	36.3	27.855	248	0	17.476	20.2	4.4	5.6	36.3	11.3	23	3798900	5758900	1314100	26571000	3398200	10614000	71918000	0	0	126280000	76523000	112810000
Q9Z2U1	Proteasome subunit alpha type-5	Psma5	22	22	26.411	241	0	8.5479	7.9	18.7	12.9	22	16.2	11.2	12260000	6169500	1847500	15088000	11042000	5355500	0	93060000	62803000	132110000	164020000	112030000
S4R270	Bridging integrator 2	Bin2	22.6	22.6	54.766	505	0	26.253	7.3	7.5	13.5	11.3	15.4	8.9	3497400	2062900	3759600	1520500	9369000	10472000	0	81498000	88070000	69924000	323870000	89506000
Z4YLB0		Abo	2.4	2.4	39.004	334	1	-2	0	2.4	0	0	0	0	0	714570	0	0	0	0	0	0	0	0	0	0

## Sheet: Carboxylate_NPs_proteinGroups
Protein IDs	Protein names	Gene names	Sequence coverage [%]	Unique sequence coverage [%]	Mol. weight [kDa]	Sequence length	Q-value	Score	Sequence coverage BN010 [%]	Sequence coverage BN012 [%]	Sequence coverage BN110 [%]	Sequence coverage KBN002 [%]	Sequence coverage KBN010 [%]	Sequence coverage KBN111 [%]	iBAQ BN010	iBAQ BN012	iBAQ BN110	iBAQ KBN002	iBAQ KBN010	iBAQ KBN111	LFQ intensity BN010	LFQ intensity BN012	LFQ intensity BN110	LFQ intensity KBN002	LFQ intensity KBN010	LFQ intensity KBN111
A0A075B5J9		Igkv17-127;Igkv17-121	34.5	34.5	12.33	113	0	9.1918	34.5	34.5	34.5	14.2	14.2	34.5	252870000	98908000	247710000	443160000	54866000	184750000	168770000	73735000	167050000	0	0	316820000
A0A075B5K2		Igkv9-124	33.7	33.7	10.419	95	0	18.808	33.7	33.7	18.9	18.9	18.9	18.9	7381300	30581000	179740000	129040000	109790000	99977000	619050000	186930000	0	1107800000	831360000	0
A0A075B5K6	Ig kappa chain V-II region 17S29.1	Igkv2-109	10.8	10.8	13.057	120	0.0080863	3.0429	0	0	0	0	10.8	10.8	0	0	0	0	15303000	25675000	0	0	0	0	0	0
A0A075B5L1		Igkv10-94	27.8	27.8	12.576	115	0	65.055	27.8	0	27.8	27.8	27.8	27.8	7544700	0	10168000	18938000	60197000	41574000	0	0	0	0	0	0
A0A075B5L3		Igkv4-90	39.3	39.3	12.609	117	0	32.464	0	0	0	39.3	39.3	39.3	0	0	0	18297000	27401000	29332000	0	0	0	88190000	151610000	111650000
A0A075B5L7		Igkv4-80	13.8	13.8	12.562	116	0	8.5978	13.8	0	0	13.8	13.8	13.8	37913000	0	0	95707000	22512000	9673600	0	0	0	0	0	0
A0A075B5M1		Igkv4-63	18.9	18.9	10.157	95	0.0030395	4.4053	0	0	0	18.9	18.9	0	0	0	0	41764000	19291000	0	0	0	0	0	0	0
A0A075B5M3	Ig kappa chain V-IV region S107B	Igkv4-58	52.6	29.9	10.293	97	0	6.7808	41.2	0	0	0	11.3	0	15700000	0	0	0	377500000	0	0	0	0	0	0	0
A0A075B5M7		Igkv5-39	47.4	34.7	10.345	95	0	21.857	47.4	47.4	12.6	47.4	31.6	31.6	34371000	46913000	63625000	231870000	175750000	295710000	71920000	48374000	0	396930000	537440000	1039799999.9999999
A0A075B5M8		Igkv12-38	54.4	54.4	12.428	114	0	48.804	0	0	0	0	0	54.4	0	0	0	0	0	160430000	0	0	0	0	0	0
A0A075B5N2	Ig kappa chain V-V region MOPC 21	Igkv6-29	34.2	26.3	12.579	114	0	10.631	34.2	0	26.3	15.8	26.3	26.3	69959000	0	17405000	78359000	92830000	20021000	146410000	0	173070000	271580000	335700000	168320000
A0A075B5N3		Igkv8-28	29.7	8.9	10.903	101	0	20.469	11.9	11.9	11.9	11.9	29.7	8.9	4482600	12723000	14043000	8376000	14361000	10361000	0	0	0	0	0	0
A0A075B5N4		Igkv8-27	42	18	10.976	100	0	41.259	27	27	42	18	27	42	0	2509100	0	8843100	47731000	14642000	0	0	0	75135000	206060000	0
A0A075B5N7		Igkv6-13	28.4	18.9	10.44	95	0	7.4454	28.4	18.9	28.4	28.4	28.4	18.9	86105000	10597000	110670000	307030000	246790000	509120000	254260000	0	304040000	1249200000	785250000	0
A0A075B5N9		Igkv3-7	30.3	0	10.856	99	0.0081522	3.1155	18.2	18.2	30.3	30.3	30.3	30.3	0	0	8738300	63015000	18740000	14322000	0	0	0	0	0	0
A0A075B5P3		Ighg2b	58	16.7	36.568	336	0	323.31	43.5	42.9	44.9	56.8	44.3	50.6	526620000	218490000	213350000	2320700000	1964499999.9999998	1856599999.9999998	1019199999.9999999	966190000	692690000	11742000000	7508999999.999999	10455000000
A0A075B5P4		Ighg1	42	8	35.633	324	0	149.48	34.3	39.2	33.3	33.3	25.6	33.3	324530000	152400000	467760000	796520000	583750000	1009299999.9999999	883070000	564400000	977290000	3661799999.9999995	2716900000	5806500000
A0A075B5P5	Ig gamma-3 chain C region	Ighg3	43.3	43.3	36.198	330	0	54.851	28.2	26.4	28.2	23.9	13.3	13	58220000	18013000	51086000	68931000	24957000	46256000	262340000	247570000	203500000	460770000	205440000	476770000
P01872	Ig mu chain C region	Ighm	53.1	53.1	49.971	454	0	323.31	48	53.1	43.2	44.5	35.5	41.4	1057099999.9999999	1240800000	876370000	838090000	698740000	535130000	3449099999.9999995	3452699999.9999995	2879000000	4059999999.9999995	4024699999.9999995	3300399999.9999995
A0A075B5P9		Ighv5-4	37.6	28.2	12.965	117	0	12.374	9.4	9.4	9.4	37.6	0	9.4	0	0	0	5709600	0	0	0	0	0	0	0	0
A0A075B5Q0	Ig heavy chain V region 345	Ighv5-6	37.6	18.8	12.863	117	0	111.99	37.6	9.4	28.2	37.6	9.4	36.8	80607000	12012000	27063000	75713000	23481000	118010000	159680000	0	139640000	351700000	0	407330000
A0A075B5Q3		Ighv2-5	22.6	8.7	12.556	115	0	5.2495	0	8.7	13.9	0	13.9	0	0	17680000	23162000	0	5225200	0	0	0	0	0	0	0
A0A075B5Q5		Ighv2-9	21.6	13.8	12.477	116	0	8.7698	13.8	0	13.8	13.8	0	21.6	0	0	8934900	257390000	0	18544000	0	0	0	0	0	0
A0A075B5Q6		Ighv5-9-1	32.8	23.3	13.067	116	0.0030769	4.6292	9.5	0	13.8	32.8	9.5	9.5	0	0	3676700	9196900	0	0	0	0	0	0	0	0
A0A075B5R0		Ighv5-16	23.3	23.3	13.217	116	0	10	0	0	0	13.8	13.8	23.3	0	0	0	5278700	30341000	46759000	0	0	0	0	281270000	531840000
A0A075B5R1		Ighv5-17	35	25.6	12.905	117	0	13.043	25.6	25.6	25.6	18.8	9.4	18.8	19649000	17169000	8888200	7170700	14599000	12155000	0	0	0	0	0	0
A0A075B5R2		Ighv7-3	40	40	13.457	120	0	24.164	10.8	0	40	10.8	21.7	12.5	17010000	0	41598000	3882500	72260000	5157100	0	0	29644000	0	266900000	106880000
A0A075B5R5		Ighv4-1	60.3	50.9	12.874	116	0	17.845	41.4	24.1	41.4	31.9	0	43.1	64217000	6313300	37283000	19261000	0	21864000	96145000	26469000	39629000	108330000	0	145670000
A0A075B5R7		Ighv14-2	34.2	17.9	13.002	117	0	9.9381	9.4	9.4	9.4	34.2	9.4	9.4	0	0	0	99253000	0	0	0	0	0	0	0	0
A0A075B5R9		Ighv14-3	60.7	41	12.975	117	0	31.061	19.7	19.7	19.7	27.4	9.4	50.4	22565000	10209000	15154000	103100000	32093000	18405000	55113000	53361000	53455000	382480000	0	0
A0A075B5S2	Ig heavy chain V region M511;Ig heavy chain V region HPCG14;Ig heavy chain V region HPCM6;Ig heavy chain V region H8;Ig heavy chain V regions TEPC 15/S107/HPCM1/HPCM2/HPCM3	Ighv7-1	38	38	13.644	121	0	10.47	10.7	38	10.7	21.5	10.7	10.7	13757000	50190000	13448000	23519000	6203200	4087000	0	94606000	0	134910000	0	0
A0A075B5S3		Ighv14-4	32.4	22.5	12.134	111	0.0029155	3.8455	9.9	9.9	9.9	9.9	9.9	32.4	0	0	0	0	0	2886200	0	0	0	0	0	0
A0A075B5S6	Ig heavy chain V region 3-6	Ighv3-1;Ighv3-6	13.8	13.8	13.109	116	0	8.7015	0	0	0	0	13.8	0	0	0	0	0	16115000	0	0	0	0	0	0	0
A0A075B5T2		Ighv6-3	41.5	18.6	13.259	118	0	5.0322	30.5	7.6	41.5	0	22.9	13.6	9157800	4238900	9016500	0	2572700	0	21132000	0	22432000	0	0	0
A0A075B5T3	Ig heavy chain V-III region T957;Ig heavy chain V-III region W3082	Ighv6-6	41.2	20.2	13.293	119	0	10.152	31.9	7.6	31.9	10.9	24.4	33.6	17735000	4980200	26786000	4634200	6824000	11851000	43298000	0	44178000	0	102950000	137240000
A0A075B5T5		Ighv1-5	55.1	55.1	10.846	98	0	34.699	0	0	0	29.6	25.5	29.6	0	0	0	0	18994000	4653400	0	0	0	0	0	0
A0A075B5T6		Ighv10-3	40.3	25.2	13.544	119	0	20.171	26.1	9.2	9.2	21.8	32.8	20.2	92005000	2682600	9014400	32649000	28548000	14140000	60818000	0	0	233990000	133880000	112160000
A0A075B5T7		Ighv1-7	57.3	20.5	13.16	117	0	15.049	38.5	30.8	0	38.5	17.9	6	16095000	8406900	0	40060000	7690700	0	44482000	0	0	168210000	0	0
A0A075B5T9		Ighv1-9	21.6	21.6	12.931	116	0.0029326	3.92	0	21.6	0	0	0	0	0	33207000	0	0	0	0	0	0	0	0	0	0
A0A075B5U6		Ighv1-20;Ighv1-37	44	25.9	13.071	116	0	5.5717	26.7	12.1	18.1	18.1	37.9	26.7	6349500	0	0	8486100	38308000	2468000	0	0	0	0	0	0
A0A075B5U7		Ighv1-22	50.4	29.9	13.022	117	0.0057471	3.7441	24.8	24.8	24.8	20.5	24.8	50.4	18517000	9850300	9199100	0	7071300	15783000	0	0	0	0	0	0
A0A075B5V5		Ighv1-39	56.4	56.4	12.93	117	0	35.597	0	0	0	56.4	29.9	12.8	0	0	0	97605000	71608000	81833000	0	0	0	334490000	127010000	0
A0A075B5V6		Ighv1-42;Ighv1-43	71.4	30.6	10.776	98	0.005698	3.6406	40.8	33.7	40.8	64.3	43.9	40.8	0	0	0	10754000	23934000	0	0	0	0	0	0	0
A0A075B5W3	Ig heavy chain V region 3	Ighv1-53;Ighv1-52;Ighv1-61	60.7	21.4	12.791	117	1	-2	27.4	12.8	26.5	20.5	20.5	26.5	15243000	0	0	0	0	0	0	0	0	0	0	0
A0A075B5W6		Ighv1-55	21.4	21.4	12.687	117	0	39.573	21.4	0	21.4	21.4	0	0	7348700	0	19816000	20002000	0	0	0	0	0	0	0	0
A0A075B5X3		Ighv1-64	60.7	21.4	12.922	117	0	36.657	27.4	12.8	47.9	20.5	20.5	26.5	20393000	0	10673000	16242000	7675400	38527000	0	0	0	184120000	126810000	0
A0A075B5X7		Ighv1-69	55.2	21.6	12.891	116	0	91.753	0	12.9	20.7	42.2	20.7	20.7	0	0	0	42199000	0	0	0	0	0	0	0	0
A0A075B5Y1	Ig heavy chain V region 102	Ighv1-74	40.5	21.6	12.9	116	0	4.7978	6	12.9	17.2	21.6	0	6	0	0	6547200	10149000	0	0	0	0	0	0	0	0
A0A075B5Y4		Ighv1-81	59	44.4	12.989	117	0	22.566	7.7	12	20.5	34.2	20.5	34.2	8717200	10987000	28201000	182680000	34500000	416360000	0	0	0	1198100000	0	1330800000
A0A075B663	Ig lambda-1 chain V region;Ig lambda-1 chain V region S43;Ig lambda-2 chain V region MOPC 315;Ig lambda-1 chain V region H2020	Iglv1	35.9	28.2	12.312	117	0	12.805	28.2	0	28.2	35.9	0	0	35402000	0	67328000	86494000	0	0	0	0	0	0	0	0
A0A075B664	Ig lambda-2 chain V region	Iglv2	36.2	28.4	12.165	116	0	10.903	28.4	0	28.4	7.8	0	0	38895000	0	29409000	0	0	0	0	0	0	0	0	0
A0A075B674		Ighv1-78	38.8	31.6	11.047	98	0.0029412	3.9217	15.3	16.3	0	0	0	7.1	23933000	3255200	0	0	0	0	0	0	0	0	0	0
A0A075B677		Igkv4-53	18.6	18.6	10.366	97	0	13.879	18.6	0	18.6	18.6	18.6	18.6	18441000	0	12965000	19178000	17319000	7593500	28762000	0	30392000	118440000	0	0
A0A075B697	Ig heavy chain V region PJ14;Ig heavy chain V region MC101;Ig heavy chain V region MOPC 141	Ighv2-9-1;Ighv2-6-8;Ighv2-3;Ighv2-2	17.2	9.5	12.481	116	0	10.586	9.5	9.5	9.5	9.5	9.5	7.8	135730000	50379000	46144000	25148000	52725000	30618000	0	0	0	0	0	0
A0A075B6A3		Igha	43.6	20.3	36.718	344	0	21.402	10.5	14.8	11.9	4.4	4.4	10.8	8697900	6239800	5724300	2671100	4914500	417570	0	0	0	0	0	0
A0A087WSN6	Fibronectin;Anastellin	Fn1	69.4	69.4	253.01	2296	0	323.31	68.2	65.7	59.5	54.3	47.2	43.3	470660000	197780000	209180000	207260000	91238000	77699000	2143299999.9999998	1470299999.9999998	1096700000	2239100000	1241900000	1388100000
A0A0A0MQA3	Alpha-1-antitrypsin 1-1	Serpina1a	55	6.9	48.795	436	0	38.626	53.4	47	55	41.7	33.9	43.3	2717400	0	10362000	0	0	0	18567000	0	67489000	0	0	0
A0A0A0MQF6	Glyceraldehyde-3-phosphate dehydrogenase	Gapdh;Gm3839	49.9	44	38.653	359	0	190.76	43.2	35.9	41.2	24.2	16.2	13.6	26971000	13473000	23602000	22601000	28414000	1156000	169170000	136100000	99680000	166710000	208590000	0
A0A0A6YXA5		Ighv1-15	54.7	34.2	12.953	117	0.0079365	2.8768	0	12.8	21.4	20.5	0	8.5	0	2605700	4626800	2081900	0	0	0	0	0	0	0	0
A0A0A6YXN4		Ighv1-18	56.4	41.9	12.912	117	0	31.503	6	0	6	56.4	12.8	56.4	0	0	0	35102000	26337000	205750000	0	0	0	306480000	0	1247900000
A0A0A6YXQ0		Ighv8-8	13.4	13.4	13.185	119	0	7.0971	0	0	0	13.4	13.4	13.4	0	0	0	17378000	7146100	13820000	0	0	0	0	0	0
F6TQW2	Ig gamma-2A chain C region secreted form	Ighg2c	28	23.3	44.095	404	0	70.856	4	4	22.8	18.8	4	23	0	0	16068000	45006000	0	193800000	0	0	194580000	1080700000	0	2176500000
A0A0A6YYE7		Igkv4-57	39.3	12	12.689	117	0	48.428	13.7	13.7	13.7	39.3	39.3	27.4	14394000	2104700	6023900	55580000	31573000	33949000	44134000	15531000	0	220060000	64557000	351780000
A0A0B4J1H7		Igkv1-135;Igkv1-133	26.7	26.7	13.305	120	0	19.89	20	9.2	26.7	20	26.7	26.7	0	0	22542000	44275000	81386000	78319000	0	0	64006000	138620000	353700000	470420000
A0A0B4J1I1		Igkv16-104	23.3	23.3	12.874	116	0	28.298	23.3	23.3	23.3	23.3	13.8	23.3	130570000	102840000	68130000	170820000	91790000	36932000	139400000	114050000	110660000	367540000	211860000	151480000
A0A0B4J1I9	Ig kappa chain V-VI region NQ2-6.1	Igkv4-55	27.4	13.7	12.736	117	0	12.458	0	0	0	13.7	27.4	27.4	0	0	0	0	9202200	3848300	0	0	0	0	0	0
A0A0B4J1J2		Igkv5-43;Igkv5-45	23.5	13	12.6	115	0.0084507	3.3904	23.5	23.5	10.4	23.5	23.5	23.5	29017000	30364000	0	44755000	25401000	44066000	0	0	0	0	0	0
A0A0B4J1J5		Ighv9-3	44.4	29.1	12.996	117	0	19.519	6	6	0	29.1	31.6	35	19385000	8869400	0	35189000	106870000	122290000	0	0	0	402440000	0	433070000
A0A0B4J1J6		Ighv10-1	38.7	23.5	13.549	119	0	13.743	26.1	20.2	32.8	32.8	32.8	9.2	39997000	15238000	29548000	33805000	25608000	0	0	0	86671000	233290000	313820000	0
A0A0B4J1J7		Ighv1-82	67.3	28.6	10.65	98	0.003096	4.662	37.8	0	15.3	20.4	7.1	27.6	11139000	0	3477500	52255000	0	43373000	0	0	0	0	0	0
A0A0B4J1M0		Ighv1-77	73.5	26.5	10.662	98	0	4.8076	24.5	0	15.3	41.8	0	22.4	0	0	0	30907000	0	0	0	0	0	0	0	0
A0A0B4J1N0		Ighv1-76	79.6	39.8	10.879	98	0	39.673	51	26.5	41.8	55.1	13.3	42.9	3918600	14820000	3942400	46572000	5068100	47140000	57190000	56612000	32322000	175280000	0	122830000
A0A0G2JE99	Ig lambda-1 chain C region		50	50	11.575	106	0	92.994	32.1	16	32.1	50	34	0	17376000	35446000	24075000	102580000	8411600	0	113750000	0	192350000	455900000	141480000	0
A0A0G2JFH5		Fbxw13;Fbxw15	12.6	12.6	11.8	103	0.007874	2.849	12.6	12.6	12.6	0	0	0	34040000	19183000	32363000	0	0	0	0	0	0	0	0	0
A0A0N4SVL8	Multimerin-1	Mmrn1	21.7	21.7	135.88	1209	0	194.67	10.8	16.1	15.6	3.7	13.4	7.4	6662800	4695000	11197000	2164000	4288300	2050700	135050000	135530000	144140000	83825000	314170000	181450000
A0A0R4IZZ5	C-type lectin domain family 4 member F	Clec4f	18.2	18.2	61.254	548	0	19.867	18.2	10.8	14.1	9.1	0	0	8443600	3309400	4583800	2716500	0	0	40340000	39702000	33174000	55867000	0	0
P06683	Complement component C9	C9	51.5	51.5	62.002	548	0	320.6	44	45.4	46.7	17.2	19.7	12.4	168630000	107020000	313060000	12828000	3077600	6044100	492230000	345760000	884100000	99180000	35726000	69980000
A0A0R4J038	Kininogen-1;Kininogen-1 heavy chain;Bradykinin;Kininogen-1 light chain	Kng1	45.7	38.4	73.1	661	0	323.31	41	42.1	38.1	33.7	30.7	32.7	719870000	494530000	720130000	627900000	625980000	598930000	2260400000	2016199999.9999998	2298800000	3212199999.9999995	3294499999.9999995	4403200000
Q9ESB3	Histidine-rich glycoprotein	Hrg	42.3	42.3	59.162	525	0	323.31	38.1	32.4	36.8	23.6	23.4	19.2	196910000	128890000	210170000	128280000	171010000	113220000	406490000	429760000	429230000	672080000	790080000	898540000
A0A0R4J0I1			40.4	4.8	46.672	418	0	20.767	34.7	36.6	40.4	36.1	29.7	35.6	7972600	2976700	9705400	0	0	0	0	0	0	0	0	0
A0A0R4J0R8	Leukocyte cell-derived chemotaxin-2	Lect2	35.8	35.8	16.391	151	0	6.1841	21.2	20.5	0	0	0	0	4372800	4569600	0	0	0	0	0	0	0	0	0	0
A0A0R4J0S2	Insulin-like growth factor-binding protein complex acid labile subunit	Igfals	40.1	40.1	66.989	603	0	115.56	31.5	40.1	27.4	2	0	0	32447000	24143000	24688000	530910	0	0	202980000	207800000	118270000	0	0	0
A0A0R4J0X5			56.2	0	45.854	413	1	-2	54.5	55	56.2	44.1	35.8	45.8	0	52616000	176110000	0	8887600	17075000	0	0	0	0	0	0
A0A0R4J0X7	Glyceraldehyde-3-phosphate dehydrogenase;Glyceraldehyde-3-phosphate dehydrogenase, testis-specific	Gapdhs	8.7	3.9	47.442	438	0.0081967	3.1548	3.2	0	8.7	0	0	3.2	0	0	1896200	0	0	0	0	0	0	0	0	0
E9QP56	Apolipoprotein C-III	Apoc3	36.5	36.5	15.163	137	0	85.995	36.5	36.5	36.5	36.5	36.5	36.5	175500000	353190000	699610000	378690000	319060000	233990000	5688700000	3200899999.9999995	5237400000	3539699999.9999995	2952699999.9999995	2735100000
E9Q638	Disintegrin and metalloproteinase domain-containing protein 9	Adam9	3.7	3.7	91.848	841	0.0056818	3.575	1.8	0	0	1.9	0	0	1789800	0	0	653430	0	0	0	0	0	0	0	0
A0A338P6F9		Pi4ka	10.8	10.8	8.4656	74	1	-2	0	0	10.8	0	0	0	0	0	0	0	0	0	0	0	0	0	0	0
A0A140T8M2			27.8	19.1	12.557	115	0	25.519	8.7	20	20	20	27.8	20	13961000	19390000	15897000	35496000	45539000	47374000	0	45091000	44961000	170940000	106750000	303400000
A0A140T8M3			44.6	24.8	13.335	121	0	31.431	7.4	7.4	34.7	24.8	32.2	29.8	12872000	17186000	13287000	16481000	22169000	12779000	0	0	83553000	0	0	94458000
A0A140T8M5			33.9	26.1	12.757	115	0.0083333	3.3536	7.8	7.8	7.8	33.9	26.1	7.8	0	0	0	34393000	14791000	0	0	0	0	0	0	0
A0A140T8N0	Ig kappa chain V-V region MOPC 41	Gm5571	31.6	31.6	12.805	117	0	68.242	31.6	31.6	30.8	31.6	30.8	31.6	70252000	84636000	71055000	232610000	71125000	93835000	235240000	227150000	170920000	1094900000	315590000	527290000
A0A140T8N3		Igkv12-47	39.1	39.1	12.617	115	0	15.523	0	20.9	0	20.9	13.9	32.2	0	44256000	0	74411000	29413000	80330000	0	117740000	0	320200000	0	0
A0A140T8N4			10.4	10.4	12.606	115	0	18.036	10.4	10.4	10.4	10.4	10.4	10.4	12773000	3327700	9068600	46615000	11301000	13284000	0	0	0	0	0	0
A0A140T8N5			40	24.3	12.787	115	0	9.3191	15.7	15.7	15.7	26.1	13.9	15.7	42850000	14735000	36203000	160100000	177590000	185100000	0	0	0	0	0	0
A0A140T8N9			26.1	26.1	12.656	115	0.008	2.9249	0	0	0	26.1	18.3	0	0	0	0	4734700	12741000	0	0	0	0	0	0	0
A0A140T8P5			22.3	9.9	13.264	121	0.002994	4.1905	9.9	9.9	12.4	9.9	17.4	22.3	17707000	8077400	0	50723000	101290000	59582000	0	0	0	0	0	0
A0A140T8P6			40.9	29.6	12.562	115	0	79.223	40.9	40.9	40.9	40.9	27.8	40.9	27008000	12478000	33384000	69528000	35655000	101330000	55324000	66330000	78486000	211800000	156740000	386910000
A0A140T8P7			27.5	7.5	13.128	120	0.0078125	2.7769	7.5	7.5	20	0	15	20	0	0	0	0	9236300	0	0	0	0	0	0	0
A0A140T8P9	Ig kappa chain V-V region L6;Ig kappa chain V-V region T1		19.7	6.8	13.232	117	0	9.6327	12.8	0	0	19.7	12.8	12.8	12149000	0	0	57422000	85157000	39762000	0	0	0	0	0	0
A0A1B0GQV5	Serum amyloid A-2 protein;Amyloid protein A	Saa2	52.3	43.2	10.074	88	0	11.086	0	0	0	52.3	14.8	34.1	0	0	0	177630000	1659400	79711000	0	0	0	690150000	0	643780000
H7BX48	NTPase KAP family P-loop domain-containing protein 1	Nkpd1	3.4	3.4	91.429	825	0.0083799	3.3569	0	0	3.4	0	0	0	0	0	3190500	0	0	0	0	0	0	0	0	0
A0A1W2P6F6	Myosin light polypeptide 6	Myl6	31.6	31.6	17.005	152	0	11.946	17.8	17.8	17.8	13.8	13.2	7.2	4459500	6415900	13001000	5163900	36686000	5548500	40505000	86339000	56447000	0	0	0
A0A1W2P788	Mannosyl-oligosaccharide 1,2-alpha-mannosidase IA	Man1a1	3.2	3.2	82.042	744	0.003003	4.2342	3.2	0	3.2	0	0	0	997950	0	1137700	0	0	0	0	0	0	0	0	0
A0A1W2P7F1	Complement C1s-B subcomponent;Complement C1s-B subcomponent heavy chain;Complement C1s-B subcomponent light chain	C1sb	22.2	2.7	77.257	694	0	48.785	22.2	12.2	15.9	19.9	18.4	9.7	4274800	7810300	6369400	540160	1366700	0	97710000	0	0	69494000	106730000	0
A0A286YDF0	Protein CTLA-2-alpha	Ctla2a	22.1	22.1	15.704	136	0	7.7052	6.6	0	9.6	9.6	15.4	15.4	3312500	0	2948900	1631900	14676000	12710000	0	0	0	0	104390000	110360000
A0A2I3BQE1		AI182371	21.7	21.7	39.898	351	0	30.258	19.1	5.4	12.5	7.1	0	3.7	7849900	999830	10959000	2307200	0	2912000	24467000	0	47319000	39979000	0	0
A0A338P6F7	Roundabout homolog 1	Robo1	1.1	1.1	177.19	1622	0.0083102	3.301	0.5	0.6	0.6	0	0	0	191140	5428200	15268000	0	0	0	0	0	0	0	0	0
A0A494B908	Glutathione S-transferase P 1;Glutathione S-transferase P 2	Gstp1;Gstp2	20	20	18.038	160	0.0082873	3.2659	10	0	0	0	10	0	1149700	0	0	0	1983700	0	0	0	0	0	0	0
A0A571BE77			5	5	33.333	282	1	-2	5	0	0	0	0	0	2345200	0	0	0	0	0	0	0	0	0	0	0
A0A571BF69			0.8	0.8	413.02	3616	0.0078947	2.8528	0.8	0.8	0.8	0	0	0	273630	128240	125500	0	0	0	0	0	0	0	0	0
Q3UTR7	Angiotensinogen;Angiotensin-1;Angiotensin-2;Angiotensin-3;Angiotensin-4;Angiotensin 1-9;Angiotensin 1-7;Angiotensin 1-5;Angiotensin 1-4	Agt	19.7	19.7	52.67	482	0	26.381	5.6	7.3	12.4	5.6	5.6	0	983500	4768200	8246700	1523500	4553100	0	0	0	0	0	0	0
S4R1B8	Bridging integrator 2	Bin2	9	9	51.582	478	0	5.2311	2.1	0	2.1	0	6.9	0	1358800	0	341680	0	1549900	0	0	0	0	0	0	0
A0A5K1VVQ1	Titin	Ttn	0.1	0.1	2991.8	26938	0.003012	4.2628	0.1	0	0	0	0	0	19335	0	0	0	0	108050	0	0	0	0	0	0
A0A668KL57	Uncharacterized protein KIAA0195	Kiaa0195	0.7	0.7	152.94	1371	0.0082645	3.2228	0.7	0.7	0.7	0.7	0.7	0	1676300	878380	968000	860580	1019400	0	0	0	0	0	0	0
A0A9L6KDF6			0.6	0.6	390.19	3720	0.0079787	2.9054	0.6	0	0.3	0.3	0.3	0	11749000	0	8381200	3463800	4751500	0	0	0	0	0	0	0
Q8K182	Complement component C8 alpha chain	C8a	56.2	56.2	66.08	587	0	323.31	48	48.6	50.4	16.7	25.7	21	86915000	40541000	113800000	12166000	10418000	6541100	309540000	279620000	592400000	226770000	167640000	187660000
A2AEN9		Gm5938	22.1	17.2	18.508	163	0.0079576	2.8948	0	0	0	0	0	22.1	0	0	0	0	0	2900600	0	0	0	0	0	0
A2BHD2		Gm14743;Obp1b	14.6	14.6	19.366	171	0.0057307	3.6947	14.6	0	0	0	0	0	9841000	0	0	0	0	0	0	0	0	0	0	0
S4R1Z9	Anoctamin;Anoctamin-4;Anoctamin-3	Ano4;Ano3	5.8	5.8	17.56	155	1	-2	5.8	0	0	0	0	0	3856300	0	0	0	0	0	0	0	0	0	0	0
A2AQ07	Tubulin beta-1 chain	Tubb1	21.1	21.1	50.44	451	0	10.233	5.1	5.1	10.6	0	10.4	0	1390400	4555000	3820500	0	4944800	0	0	0	0	0	0	0
A2AUR7	Ras suppressor protein 1	Rsu1	22.3	22.3	29.543	260	0	6.8763	3.1	15.8	9.6	0	0	0	1611700	3000100	791320	0	0	0	0	0	0	0	0	0
A9R9W0	Major urinary protein 1;Major urinary protein 6;Major urinary proteins 11 and 8	Mup15;Mup1;Mup4;Mup9;Mup6;Mup8;Mup7;Mup14;Mup19	51.1	0	20.647	180	0	63.75	11.7	11.7	51.1	0	0	0	6615700	2573400	44124000	0	0	0	0	0	0	0	0	0
A6X935	Inter alpha-trypsin inhibitor, heavy chain 4	Itih4	65.1	2.3	104.66	942	0	9.5796	57.2	57	56.8	53.7	49.7	45.9	24038000	14014000	13540000	12386000	5753100	0	0	0	0	0	0	0
A6ZI44	Fructose-bisphosphate aldolase;Fructose-bisphosphate aldolase A	Aldoa	10.8	10.8	45.12	418	0	5.0378	0	0	0	0	5.5	5.3	0	0	0	0	1314600	505490	0	0	0	0	0	0
A8DUK4		Hbbt1;Hbb-bs	95.2	24.5	15.748	147	0	81.469	84.4	95.2	84.4	68	74.8	59.2	775560000	500000000	896950000	599810000	773330000	81973000	2431400000	2747100000	2542400000	4192099999.9999995	4758200000	653690000
B1ARR4	Carbonic anhydrase 6	Car6;Ca6	8.8	8.8	30.347	261	0.0029762	4.1406	5.7	0	0	0	0	3.1	0	0	0	0	0	852390	0	0	0	0	0	0
B1AY86	Plexin domain-containing protein 2	Plxdc2	6.1	6.1	53.733	479	0.0029851	4.1537	6.1	2.5	2.5	0	0	0	4121200	888990	963370	0	0	0	0	0	0	0	0	0
B7FAV1	Filamin-A	Flna	7.7	7.7	274.63	2583	0	44.619	0.4	2.1	1.8	0.4	6.5	0	200430	99853	486450	63349	577670	0	0	33059000	23657000	0	0	0
B7ZCG3	BPI fold-containing family A member 2	Bpifa2	56.9	56.9	22.321	211	0	159.27	0	0	0	0	32.7	56.9	0	0	0	0	198270000	531820000	0	0	0	0	824010000	2198200000
B8JJN0	Complement factor B;Complement factor B Ba fragment;Complement factor B Bb fragment	Gm20547;Cfb	47.2	37.2	142.32	1276	0	323.31	36.3	34.3	40.2	18.2	18.2	14.6	116620000	76429000	115620000	73707000	46182000	56054000	730320000	685850000	596650000	850410000	689210000	665300000
D2XZ31		Abpa29_a7;Scgb1b20;Scgb1b11	37.6	37.6	10.104	93	0	8.4605	0	0	37.6	0	0	15.1	0	0	6023500	0	0	8913800	0	0	0	0	0	0
D3YV17	Trinucleotide repeat-containing gene 18 protein	Tnrc18	1.5	1.5	187.74	1755	0.0057971	3.818	1.5	0	0	0	0	0	898720	0	0	0	0	0	0	0	0	0	0	0
D3YXF5		C7	35.3	35.3	93.337	845	0	70.128	0	1.1	35.1	0	0	0	0	16601	17732000	0	0	0	0	0	0	0	0	0
D3YZE3	Procollagen C-endopeptidase enhancer 1	Pcolce	26.6	26.6	23.248	214	0	18.125	19.2	14	21.5	6.1	0	0	12654000	5977400	3742800	982930	0	0	31271000	20539000	21738000	0	0	0
D3Z5G7	Carboxylic ester hydrolase	Ces1b	14.5	5.8	62.196	567	0	323.31	13.1	13.2	13.1	13.1	14.3	14.3	42263000	35529000	138470000	36790000	35702000	10679000	1003999999.9999999	639930000	1598199999.9999998	684830000	729800000	588960000
D3Z7M4	Insulin-like growth factor I	Igf1	21.5	21.5	15.075	135	0.0030581	4.5113	21.5	0	11.1	0	0	0	30644000	0	12774000	0	0	0	0	0	0	0	0	0
E0CXK2		Cacna1i	0.6	0.6	205.41	1835	1	-2	0.6	0	0	0.6	0	0.6	1499100	0	0	954120	0	763880	0	0	0	0	0	0
E0CXN0	Hepatocyte growth factor-like protein;Hepatocyte growth factor-like protein alpha chain;Hepatocyte growth factor-like protein beta chain	Mst1	15.4	15.4	79.714	707	0	23.782	13.2	7.4	9.3	1.6	1.4	0	11751000	3605900	1794800	481440	712710	0	60969000	55766000	37818000	0	0	0
E9QQ18	Proteoglycan 4;Proteoglycan 4 C-terminal part	Prg4	20.8	20.8	106.52	965	0	45.346	4.9	4	2.4	13.7	15	16.3	285370	262100	1479400	11209000	18485000	25695000	19434000	18052000	8774100	263750000	548080000	884510000
E9PUM5		Gm4788	60.9	2.6	91.444	808	0.0080214	2.9281	45.4	38.1	41.7	27	33.2	26.9	0	0	0	0	0	0	0	0	0	0	0	0
E9PV24	Fibrinogen alpha chain;Fibrinopeptide A;Fibrinogen alpha chain	Fga	42.7	42.7	87.428	789	0	233.83	26.6	20.5	18.3	30.9	30.7	19.6	19802000	5030100	7253000	79145000	57154000	32497000	249420000	185170000	111980000	1488599999.9999998	1112300000	543050000
E9PVD2		Itih4	65	2.2	104.59	941	0	323.31	57.2	57	56.7	53.7	49.6	48.1	691510000	402400000	378400000	772140000	430150000	329530000	2521800000	2165000000	1523199999.9999998	5058800000	2727200000	3658199999.9999995
E9PX70	Collagen alpha-1(XII) chain	Col12a1	13.4	13.4	333.73	3064	0	79.242	7	2.3	2.4	1	10	2.7	18958000	589140	687290	220890	4697000	827680	546970000	72010000	141720000	0	860920000	117160000
F7B276	Hyaluronan-binding protein 2;Hyaluronan-binding protein 2 50 kDa heavy chain;Hyaluronan-binding protein 2 50 kDa heavy chain alternate form;Hyaluronan-binding protein 2 27 kDa light chain;Hyaluronan-binding protein 2 27 kDa light chain alternate form	Habp2	9.1	9.1	24.514	220	0.0030211	4.349	9.1	4.5	4.5	0	0	0	6558300	523490	687650	0	0	0	0	0	0	0	0	0
E9Q414	Apolipoprotein B-100;Apolipoprotein B-48	Apob	37.8	37.8	509.43	4505	0	323.31	32.1	19.5	29.8	17.7	10.9	8.9	36653000	8407400	30244000	13774000	8721700	3961500	309310000	141020000	226490000	247450000	201020000	162420000
E9Q591		Prr27	3.8	3.8	36.263	344	1	-2	0	0	0	0	3.8	0	0	0	0	0	384630000	0	0	0	0	0	0	0
Q8CG14	Complement C1s-A subcomponent;Complement C1s-A subcomponent heavy chain;Complement C1s-A subcomponent light chain	C1sa;C1s1	53.3	33.7	76.857	688	0	323.31	51.9	37.5	45.5	43.8	39.7	28.9	329470000	203760000	223160000	160620000	136340000	94861000	1586099999.9999998	1351700000	1016699999.9999999	1400500000	1045099999.9999999	1178700000
E9Q6D8		C6	18.4	18.4	104.62	934	0	28.544	0	0	18.4	0	0	0	0	0	13469000	0	0	0	0	0	0	0	0	0
Q61730	Interleukin-1 receptor accessory protein	Il1rap	17.4	17.4	65.74	570	0	17.714	8.1	3.5	13	0	1.9	0	6562100	3926200	27109000	0	709300	0	48526000	46207000	153860000	0	0	0
E9Q748	Antileukoproteinase	Slpi	46.7	46.7	11.931	107	0	11.941	32.7	20.6	20.6	14	15	7.5	315160000	201170000	165470000	118870000	261040000	83669000	671320000	495140000	337820000	671160000	0	0
E9Q8B5		Gm4788	60.4	6.8	99.437	879	0	323.31	45.1	40.4	40.2	26.5	29.8	26.4	55264000	52291000	66484000	24162000	28462000	29675000	635350000	577570000	707750000	505530000	708910000	839720000
E9Q8I0	Complement factor H	Cfh	72.1	62.7	141.27	1252	0	323.31	67.4	58	56.9	54	46.6	46.6	874120000	446950000	684950000	410110000	409830000	356180000	3648999999.9999995	2723000000	2651500000	3596299999.9999995	3829799999.9999995	4032599999.9999995
E9QNX4	Alpha-protein kinase 1	Alpk1	1.1	1.1	135.87	1231	0.0078534	2.8384	0	0.6	0.6	0.6	0	0	0	2346000	3185500	1382100	0	0	0	0	0	0	0	0
E9QPU1	von Willebrand factor;von Willebrand antigen 2	Vwf	0.7	0.7	309.15	2813	0	5.0162	0.7	0.7	0.5	0	0	0	130160	109950	305920	0	0	0	11266000	11894000	0	0	0	0
F6URP1		Gm6619;5430401F13Rik	21.7	21.7	18.948	175	0	8.2212	0	0	0	6.9	14.9	6.9	0	0	0	438080	0	3258000	0	0	0	0	0	0
F7BAE9		Trf	69.4	5.8	30.473	278	1	-2	61.9	63.7	61.9	61.9	61.9	66.2	0	0	0	0	0	0	0	0	0	0	0	0
F8WIP8	Osteopontin	Spp1	15.6	15.6	32.587	295	0	9.2624	0	0	0	3.1	14.9	8.1	0	0	0	1454400	10689000	12365000	0	0	0	0	109880000	140190000
G3UYL6		Gstt3;Gm20441	12.2	12.2	16.333	147	1	-2	12.2	0	0	0	0	0	76853000	0	0	0	0	0	0	0	0	0	0	0
G3X9T8		Cp	61.8	1	121.08	1060	0	323.31	50.8	49.8	57.8	53.1	55	51.2	109720000	59799000	231460000	219540000	294460000	319640000	766610000	765290000	1258200000	1996099999.9999998	2318500000	3267899999.9999995
G3X977	Inter-alpha-trypsin inhibitor heavy chain H2	Itih2	40.7	40.7	106.36	950	0	323.31	33.5	32.7	34.6	23.1	26.1	21.1	97734000	52833000	104980000	44210000	82277000	44709000	835340000	600550000	680850000	715450000	957060000	776770000
H7BWY6	Retinol-binding protein 4	Rbp4	55.1	55.1	28.405	245	0	102.24	46.1	26.1	50.2	7.3	0	7.3	13630000	17191000	47144000	5194400	0	890860	142320000	78054000	237730000	54896000	0	0
J3QJY4		Scgb1b3	22.6	22.6	10.061	93	0.0080645	2.9625	0	0	22.6	0	0	0	0	0	14504000	0	0	0	0	0	0	0	0	0
J3QK77	Secretoglobin family 2B member 20	Scgb2b20;Scgb2b7	26.8	26.8	12.605	112	0.0029499	3.9392	0	0	26.8	0	0	0	0	0	7788200	0	0	0	0	0	0	0	0	0
S4R2L0		Scgb2b12;Scgb2b19;Scgb2b11;Scgb2b18	25.9	25.9	12.774	112	0	6.0561	0	0	25.9	0	0	0	0	0	8390900	0	0	0	0	0	0	0	0	0
Q6URW6	Myosin-14	Myh14	3	1.2	228.58	2000	0	4.7373	0.8	1.4	2	0.8	2.4	0	0	369610	1420600	0	1234300	0	0	0	0	0	0	0
O08538	Angiopoietin-1	Angpt1	41.2	41.2	57.518	498	0	54.373	31.5	29.7	25.5	18.9	29.9	12.9	29916000	15775000	18143000	7717600	43312000	19661000	126830000	139700000	113010000	129450000	319150000	264860000
O09164	Extracellular superoxide dismutase [Cu-Zn]	Sod3	20.3	20.3	27.392	251	0	7.7008	11.6	4	13.9	0	5.2	0	5846800	860670	1149600	0	1007300	0	0	0	0	0	0	0
O35598	Disintegrin and metalloproteinase domain-containing protein 10	Adam10	4.4	4.4	83.967	749	0.0082418	3.2162	0	2.5	0	0	1.9	0	0	562140	0	0	526730	0	0	0	0	0	0	0
O35930	Platelet glycoprotein Ib alpha chain	Gp1ba	6.1	6.1	80.054	734	0	5.3642	1.6	3.4	6.1	0	1.8	0	3408800	1772300	2925200	0	448590	0	0	24749000	22501000	0	0	0
O54890	Integrin beta-3	Itgb3	4.6	4.6	86.738	787	0	6.6775	0	1.4	0	0	4.6	0	0	292430	0	0	1507700	0	0	0	0	0	0	0
O55222	Integrin-linked protein kinase	Ilk	4.6	4.6	51.373	452	0.0080429	2.9579	2.4	4.6	0	0	2.2	0	1022600	1323700	0	0	838340	0	0	0	0	0	0	0
O55226	Chondroadherin	Chad	16.2	16.2	40.348	358	0	15.082	7.3	8.9	0	0	0	0	2883000	2275000	0	0	0	0	0	0	0	0	0	0
O70165	Ficolin-1	Fcn1	27.2	27.2	36.298	334	0	13.318	24.6	2.7	14.7	0	2.7	0	6720400	1536400	9126000	0	1616000	0	41734000	0	40585000	0	0	0
O88783	Coagulation factor V;Coagulation factor V heavy chain;Coagulation factor V light chain	F5	39.3	34	247.23	2183	0	323.31	31.1	33	30.7	19.2	19.7	21.1	151220000	114140000	117740000	62759000	70162000	61204000	760410000	703080000	504970000	771390000	693630000	909070000
Q3U3V1	Coagulation factor X;Factor X light chain;Factor X heavy chain;Activated factor Xa heavy chain	F10	42.8	42.8	55.255	493	0	323.31	42	42	39.8	36.7	34.5	38.3	1568599999.9999998	1184400000	1384600000	484510000	386460000	769500000	3540999999.9999995	3723699999.9999995	2927599999.9999995	2347800000	2341000000	4449500000
O88968	Transcobalamin-2	Tcn2	34.9	34.9	47.585	430	0	37.409	28.6	11.4	22.6	0	6.3	0	11202000	6184200	5345600	0	818110	0	80801000	37626000	50715000	0	0	0
O89020	Afamin	Afm	38.5	38.5	69.378	608	0	132.46	32.9	18.9	33.6	15.3	8.2	3.8	72668000	34049000	28847000	6816700	2492500	2401200	413780000	367710000	275990000	111360000	36318000	59957000
P00920	Carbonic anhydrase 2	Ca2;Car2	43.5	43.5	29.032	260	0	61.789	26.9	36.9	23.5	21.9	21.5	0	12993000	17375000	13988000	6784500	9754600	0	25549000	38236000	36217000	59401000	92422000	0
P01027	Complement C3;Complement C3 beta chain;C3-beta-c;Complement C3 alpha chain;C3a anaphylatoxin;Acylation stimulating protein;Complement C3b alpha chain;Complement C3c alpha chain fragment 1;Complement C3dg fragment;Complement C3g fragment;Complement C3d fragment;Complement C3f fragment;Complement C3c alpha chain fragment 2	C3	84.4	84.4	186.48	1663	0	323.31	78.2	77.1	75.6	64.6	61.8	64.3	1269600000	795580000	1015499999.9999999	817150000	519090000	527590000	3894199999.9999995	3451399999.9999995	3029599999.9999995	4675300000	2962199999.9999995	3907299999.9999995
P01029	Complement C4-B;Complement C4 beta chain;Complement C4 alpha chain;C4a anaphylatoxin;Complement C4 gamma chain	C4b	62.4	59.8	192.91	1738	0	323.31	57.1	52.9	55.2	31.4	33.8	26.6	258470000	128190000	163470000	94698000	70402000	51147000	1852899999.9999998	1313900000	1166100000	1594399999.9999998	1107600000	1164300000
P01592	Immunoglobulin J chain	Igj	30.8	30.8	18.013	159	0	28.65	17	21.4	16.4	25.2	25.2	25.2	26773000	25412000	34779000	70985000	60424000	62272000	207080000	233070000	289980000	268790000	239180000	475010000
P01626	Ig kappa chain V-II region MOPC 167		27.7	21.4	12.349	112	0	7.692	0	0	0	21.4	21.4	6.2	0	0	0	1862700	10924000	55269000	0	0	0	0	0	0
P01631	Ig kappa chain V-II region 26-10	Igkv1-110;Igkv1-99;Igkv1-115	38.9	21.2	12.273	113	0	111.25	38.9	32.7	32.7	38.9	38.9	38.9	149560000	99336000	84122000	516070000	187370000	384380000	217490000	215130000	286260000	1899699999.9999998	731620000	1964799999.9999998
P01642	Ig kappa chain V-V region L7	Gm10881	23.5	23.5	12.615	115	0.005814	3.8324	0	0	0	23.5	13	13	0	0	0	23898000	5372200	8843300	0	0	0	0	0	0
P01645	Ig kappa chain V-V region HP 93G7;Ig kappa chain V-V region HP R16.7;Ig kappa chain V-V region HP 124E1;Ig kappa chain V-V region HP 123E6;Ig kappa chain V-V region HP 91A3		66.7	56.5	11.954	108	0	153.01	57.4	41.7	36.1	46.3	50.9	66.7	189450000	14803000	74033000	136910000	252930000	198170000	270330000	237820000	197150000	783330000	1117500000	1036399999.9999999
P01656	Ig kappa chain V-III region MOPC 70;Ig kappa chain V-III region PC 2880/PC 1229;Ig kappa chain V-III region 50S10.1;Ig kappa chain V-III region PC 7132		40.5	24.3	11.904	111	0	4.8987	16.2	16.2	16.2	40.5	16.2	16.2	0	0	0	12206000	0	0	0	0	0	0	0	0
P01668	Ig kappa chain V-III region PC 7210;Ig kappa chain V-III region PC 7183;Ig kappa chain V-III region PC 7043;Ig kappa chain V-III region CBPC 101		30.9	14.5	11.95	110	0	25.069	16.4	16.4	30.9	30.9	30.9	16.4	0	0	14015000	7668100	8946200	0	0	0	0	0	0	0
P01670	Ig kappa chain V-III region PC 6684;Ig kappa chain V-III region PC 7175		68.5	27.9	12.039	111	0	46.857	50.5	44.1	58.6	26.1	30.6	26.1	9011000	19015000	55846000	69686000	42197000	28185000	66703000	70404000	173030000	1142700000	603990000	634610000
P01679	Ig kappa chain V-VI region J539;Ig kappa chain V-VI region SAPC 10;Ig kappa chain V-VI region TEPC 601/TEPC 191;Ig kappa chain V-VI region XRPC 24;Ig kappa chain V-VI region XRPC 44	Igkv4-86	37.4	29.9	11.502	107	0	13.348	37.4	0	16.8	0	0	0	7413600	0	5489000	0	0	0	0	0	0	0	0	0
P01754	Ig heavy chain V region 1-62-3;Ig heavy chain V region VH558 B4;Ig heavy chain V region 186-1	Ighv1-62-3	56.4	37.6	12.921	117	0	69.061	6	39.3	13.7	40.2	32.5	23.1	0	22320000	9868400	249860000	140430000	117660000	0	0	0	792330000	821310000	0
P01757	Ig heavy chain V region J558;Ig heavy chain V region MOPC 104E		59.8	20.5	13.024	117	0	30.275	42.7	16.2	22.2	33.3	33.3	39.3	7782000	0	0	0	0	0	0	0	0	0	0	0
P01837	Ig kappa chain C region		95.3	95.3	11.934	107	0	323.31	95.3	81.3	88.8	88.8	88.8	56.1	1330200000	2042199999.9999998	2949899999.9999995	8466199999.999999	6381199999.999999	10051000000	5113300000	4234699999.9999995	5499300000	20957000000	18526000000	32992000000
Q99JC1	Ig lambda-2 chain C region	Iglc2	47.6	14.3	11.311	105	0	20.241	31.4	31.4	47.6	0	0	17.1	61013000	12503000	18747000	0	0	3413300	105300000	61058000	66742000	0	0	48466000
P01865	Ig gamma-2A chain C region, membrane-bound form;Ig gamma-2A chain C region, A allele	Igh-1a;Ighg	29.9	25.1	43.949	398	0	214.97	29.1	26.4	17.3	22.4	26.4	22.4	66581000	77599000	46308000	251870000	645500000	507840000	354730000	477130000	513310000	2156300000	3806399999.9999995	4192599999.9999995
P01867	Ig gamma-2B chain C region	Igh-3	47.3	13.4	44.259	404	0	13.521	40.8	36.4	24.8	37.9	36.9	31.7	1709100	122010000	0	15403000	18687000	370630000	0	0	0	0	0	0
P01868	Ig gamma-1 chain C region secreted form;Ig gamma-1 chain C region, membrane-bound form	Ighg1	44.4	10.5	35.704	324	0	126.68	39.5	44.4	38.6	25.3	20.4	25.3	10357000	25768000	7629900	0	0	0	0	0	0	0	0	0
P01878	Ig alpha chain C region		27.9	4.7	36.875	344	0	6.6932	15.1	19.5	7	4.4	9	4.7	2851500	5791700	2636100	0	3253700	5522000	0	0	0	0	0	0
P01887	Beta-2-microglobulin	B2m	52.1	52.1	13.779	119	0	9.2844	8.4	32.8	27.7	8.4	0	8.4	150650000	67662000	246520000	27740000	0	15351000	0	0	0	0	0	0
P01898	H-2 class I histocompatibility antigen, Q10 alpha chain	H2-Q10	43.7	32.3	37.251	325	0	105.16	43.7	40.3	43.7	33.2	19.4	18.8	182990000	58490000	244720000	23354000	9683900	9916800	376690000	301120000	508880000	181640000	90450000	138100000
P02088	Hemoglobin subunit beta-1	Hbb-b1	95.2	15	15.84	147	0	323.31	84.4	89.1	84.4	77.6	84.4	61.2	3041399999.9999995	1873099999.9999998	3121499999.9999995	2068499999.9999998	2975799999.9999995	211710000	4961400000	4104399999.9999995	3630499999.9999995	6198799999.999999	8529699999.999999	1097100000
P02089	Hemoglobin subunit beta-2	Hbb-b2	91.2	46.3	15.878	147	0	85.72	80.3	91.2	74.1	68	74.1	41.5	355470000	219540000	312980000	268970000	477340000	7238600	766050000	556470000	499080000	1234900000	1966299999.9999998	209340000
P03953	Complement factor D	Cfd	42.1	42.1	28.057	259	0	66.332	42.1	42.1	37.5	16.6	16.6	0	10769000	1893100	12713000	32084000	2703700	0	617780000	648350000	549060000	340800000	196520000	0
P05213	Tubulin alpha-1B chain;Tubulin alpha-4A chain;Tubulin alpha-3 chain;Tubulin alpha-1A chain;Tubulin alpha-1C chain	Tuba1b;Tuba4a;Tuba3a;Tuba1a;Tuba1c	22.6	22.6	50.151	451	0	18.575	0	10	0	6	16.4	0	0	1157900	0	842980	46443000	0	0	0	0	0	0	0
P05366	Serum amyloid A-1 protein	Saa1	24.6	18	13.77	122	0	6.9347	0	0	0	17.2	0	24.6	0	0	0	37616000	0	41998000	0	0	0	0	0	0
P06330	Ig heavy chain V region AC38 205.12		63.6	0	12.934	118	0	69.978	46.6	40.7	46.6	57.6	57.6	63.6	228450000	15809000	172370000	79605000	59812000	223760000	540730000	316470000	636650000	2001999999.9999998	1770299999.9999998	2999899999.9999995
P06684	Complement C5;Complement C5 beta chain;Complement C5 alpha chain;C5a anaphylatoxin;Complement C5 alpha chain	C5	43.8	43.8	188.88	1680	0	323.31	22.5	18.2	37	12.1	12.9	13.2	11021000	4707500	55280000	9683900	9226100	14786000	132340000	156470000	341290000	213230000	265380000	405100000
P06728	Apolipoprotein A-IV	Apoa4	83.8	83.8	45.029	395	0	323.31	74.7	77	83.3	79.7	71.1	66.1	1250700000	722110000	1564599999.9999998	728570000	621070000	440130000	2295100000	1783099999.9999998	2704900000	2656600000	2325600000	2135099999.9999998
P07309	Transthyretin	Ttr	67.3	67.3	15.776	147	0	159.71	67.3	67.3	67.3	56.5	40.1	35.4	730270000	320000000	913240000	148160000	65127000	76317000	1939299999.9999998	1161600000	2320900000	1227900000	579610000	669500000
P07361	Alpha-1-acid glycoprotein 2	Orm2	26.6	9.2	23.843	207	0	5.4596	17.4	17.4	17.4	26.6	18.4	26.6	0	0	0	9356400	9208100	14955000	0	0	0	679790000	0	912390000
P07724	Serum albumin	Alb	94.4	92.9	68.692	608	0	323.31	91.6	88.2	84.7	81.1	79.4	68.6	31094000000	23889000000	25102000000	13211000000	14838000000	10766000000	83238000000	80406000000	68880000000	44368000000	45853000000	36194000000
P07759	Serine protease inhibitor A3K	Serpina3k	59.8	21.5	46.879	418	0	323.31	53.1	53.1	59.8	53.6	50	56	3624399999.9999995	2932499999.9999995	7468199999.999999	1386100000	1868999999.9999998	1096700000	6722499999.999999	7053999999.999999	12463000000	4666300000	5353700000	4766800000
P07901	Heat shock protein HSP 90-alpha	Hsp90aa1	5	1.5	84.787	733	0	6.1936	0	0	0	5	1.6	0	0	0	0	2072100	1038200	0	0	0	0	0	0	0
P08071	Lactotransferrin	Ltf	53.3	52.1	77.837	707	0	67.798	22.5	20.2	8.8	32	18.1	28.9	1822600	3792900	4264300	10437000	19338000	27871000	64860000	80031000	105900000	207100000	247480000	380580000
P08226	Apolipoprotein E	Apoe	67.2	67.2	35.866	311	0	323.31	61.1	54.3	63.7	43.1	37.3	36.3	839720000	394570000	1129700000	339100000	78094000	172430000	1550599999.9999998	1013399999.9999999	2134199999.9999998	1237600000	752600000	1215900000
P08607	C4b-binding protein	C4bpa;C4bp	25.2	25.2	51.523	469	0	46.067	25.2	23.2	25.2	9.4	7.7	4.9	76805000	20039000	70556000	3434800	10980000	1952800	394860000	177140000	394830000	86921000	97301000	29300000
P08905	Lysozyme C-2;Lysozyme C-1	Lyz2;Lyz1	14.9	14.9	16.689	148	0	5.8465	14.9	0	10.1	10.1	10.1	0	23516000	0	11754000	4430700	9660100	0	0	0	0	0	0	0
P09405	Nucleolin	Ncl	4.1	4.1	76.722	707	0	6.4208	0	0	0	0	0	4.1	0	0	0	0	0	680240	0	0	0	0	0	0
P09813	Apolipoprotein A-II;Proapolipoprotein A-II	Apoa2	46.1	46.1	11.309	102	0	111.71	14.7	14.7	46.1	14.7	46.1	18.6	528310000	2142899999.9999998	4531100000	153810000	989930000	822470000	6036399999.999999	5562500000	8103099999.999999	3806899999.9999995	3012999999.9999995	3107799999.9999995
P10126	Elongation factor 1-alpha 1;Elongation factor 1-alpha 2	Eef1a1;Eef1a2	19.7	19.7	50.113	462	0	26.086	19.7	16	7.8	10.4	2.6	0	6199200	1963500	4996600	4002300	1169300	0	74780000	56176000	28972000	70364000	0	0
P10605	Cathepsin B;Cathepsin B light chain;Cathepsin B heavy chain	Ctsb	8.6	8.6	37.279	339	0.0030675	4.5554	3.8	3.8	8.6	3.8	0	0	1619700	1322400	1657800	240630	0	0	0	0	0	0	0	0
Q8CBB6	Histone H2B;Histone H2B type 1-P;Histone H2B type 1-K;Histone H2B type 1-C/E/G;Histone H2B type 2-B;Histone H2B type 1-H;Histone H2B type 1-B;Histone H2B type 1-M;Histone H2B type 1-F/J/L;Histone H2B type 3-A;Histone H2B type 3-B;Histone H2B type 2-E;Histone H2B type 1-A	Hist1h2br;Hist1h2bp;Hist1h2bk;Hist1h2bc;Hist2h2bb;Hist1h2bh;Hist1h2bb;Hist1h2bm;Hist1h2bf;Hist3h2ba;Hist3h2bb;Hist2h2be;Hist1h2ba	38.1	38.1	14.888	134	0	99.375	0	0	0	8.2	25.4	38.1	0	0	0	8616200	19227000	99026000	0	0	0	0	129830000	878320000
P11087	Collagen alpha-1(I) chain	Col1a1	6.1	6.1	138.03	1453	0	28.435	4.4	2.9	6.1	0	0	0	2088000	1181300	4740600	0	0	0	61536000	39689000	83939000	0	0	0
P11247	Myeloperoxidase;Myeloperoxidase light chain;Myeloperoxidase heavy chain	Mpo	5	5	81.181	718	0	32.072	1.7	0	1.7	0	3.3	3.3	313990	0	490860	0	657650	352830	0	0	0	0	0	0
P11589	Major urinary protein 2	Mup2;Mup1;Mup10	49.4	11.1	20.663	180	0.0057143	3.6851	11.7	17.8	49.4	0	0	0	0	2703300	8609200	0	0	0	0	0	0	0	0	0
P11680	Properdin	Cfp	22.8	22.8	50.327	464	0	31.844	14.4	17.2	14.7	9.5	6.9	3	11717000	7290600	13795000	13405000	9301100	4364700	89841000	86990000	51570000	132250000	106270000	0
P12246	Serum amyloid P-component	Apcs	75.9	75.9	26.247	224	0	323.31	71	73.7	68.8	60.7	60.7	60.7	4226899999.9999995	3891799999.9999995	3123299999.9999995	10813000000	11712000000	11486000000	11152000000	13954000000	7712299999.999999	39132000000	40777000000	49362000000
P13020	Gelsolin	Gsn	80.3	55	85.941	780	0	323.31	72.6	71.8	74	56.4	57.2	51.5	2695600000	1525699999.9999998	1806799999.9999998	1145200000	743460000	378240000	8487899999.999999	6102399999.999999	5257800000	5804600000	3770999999.9999995	2209500000
P14106	Complement C1q subcomponent subunit B	C1qb	48.2	48.2	26.717	253	0	114.82	45.5	33.2	33.2	45.5	41.9	37.2	748400000	460900000	403220000	869780000	588090000	632820000	3565899999.9999995	2807400000	2802700000	5782000000	6265899999.999999	4554100000
P14847	C-reactive protein	Crp	29.3	29.3	25.36	225	0	66.636	29.3	29.3	28.4	11.6	17.8	23.1	153100000	71268000	82399000	29296000	36294000	51665000	478530000	314100000	287410000	0	289540000	444400000
P16294	Coagulation factor IX;Coagulation factor IXa light chain;Coagulation factor IXa heavy chain	F9	41	41	52.977	471	0	127.72	28.2	38.2	26.1	2.3	9.3	11.7	27474000	65003000	56600000	8219700	21043000	42781000	167960000	305880000	194970000	0	271490000	511820000
P16301	Phosphatidylcholine-sterol acyltransferase	Lcat	9.4	9.4	49.746	438	0	6.807	3.2	3.2	3.2	3.9	3.9	6.2	4560000	5815500	4340100	1565800	2488700	2326400	0	0	0	0	0	0
P17182	Alpha-enolase;Enolase	Eno1	18.9	18.9	47.14	434	0	7.5277	4.4	0	0	0	14.5	0	169570	0	0	0	1129900	0	0	0	0	0	0	0
P18525	Ig heavy chain V region 5-84		32.5	0	12.872	117	0	16.411	32.5	18.8	32.5	32.5	13.7	18.8	3674400	0	5874300	23081000	23527000	0	0	0	0	0	0	0
P18527	Ig heavy chain V region 914;Ig heavy chain V region 5-76		27.8	16.5	10.661	97	0	21.297	27.8	27.8	27.8	27.8	16.5	27.8	69263000	43205000	8165800	18487000	50157000	4377800	0	0	0	0	0	0
P18528	Ig heavy chain V region 6.96		41.8	19.4	11.007	98	0	18.371	22.4	22.4	22.4	41.8	19.4	41.8	4584200	6666000	8070000	7441300	90733000	8392900	0	0	0	1231700000	0	925280000
P18760	Cofilin-1	Cfl1	39.2	39.2	18.559	166	0	8.9557	16.9	16.9	0	13.9	22.3	7.2	3467600	4021300	0	7662100	43412000	1325900	0	0	0	53412000	175840000	0
P19221	Prothrombin;Activation peptide fragment 1;Activation peptide fragment 2;Thrombin light chain;Thrombin heavy chain;Prothrombin	F2	53.4	53.4	70.268	618	0	323.31	48.5	49.5	51.8	40.6	46	41.6	1058799999.9999999	648530000	723080000	284050000	530020000	226000000	3310299999.9999995	2822300000	2654800000	2030699999.9999998	2798800000	2210600000
P20918	Plasminogen;Plasmin heavy chain A;Activation peptide;Angiostatin;Plasmin heavy chain A, short form;Plasmin light chain B	Plg	75.2	75.2	90.807	812	0	323.31	73.4	69.3	62.3	41.9	47.7	37.1	232460000	182210000	210530000	92812000	187650000	108030000	719950000	689530000	774200000	903860000	1248000000	1210300000
P21180	Complement C2;Complement C2b fragment;Complement C2a fragment	C2	25.7	8.9	84.741	760	0	23.916	16.7	11.2	21.7	2.1	0	0	1750700	2985800	185380	252610	0	0	0	53889000	29476000	0	0	0
P21460	Cystatin-C	Cst3	17.9	17.9	15.531	140	0.0084034	3.3643	17.9	0	7.9	0	0	0	3754200	0	1810500	0	0	0	0	0	0	0	0	0
P21614	Vitamin D-binding protein	Gc	62	62	53.6	476	0	323.31	57.8	52.9	48.5	27.9	21.8	23.3	457540000	191220000	477970000	59584000	53566000	65588000	1153400000	1070999999.9999999	1398900000	668930000	410480000	642830000
P22599	Alpha-1-antitrypsin 1-2	Serpina1b	57.4	23.2	45.974	413	0	203.03	51.8	53.3	55.9	47.9	39	45.3	296780000	221440000	331810000	72777000	66696000	74759000	2092999999.9999998	1583099999.9999998	2868900000	887430000	669080000	851200000
P23953	Carboxylesterase 1C	Ces1c	32.9	24	61.055	554	0	195.68	24.5	24.7	30.3	20	20.9	16.6	1074700000	507810000	1171400000	397600000	355770000	216460000	3402799999.9999995	2501400000	3969299999.9999995	2189100000	1903399999.9999998	1973999999.9999998
P24369	Peptidyl-prolyl cis-trans isomerase B	Ppib	33.3	33.3	23.713	216	0	14.953	19.4	12.5	5.1	11.6	16.7	11.1	13930000	6968100	4070800	1485100	27641000	5358800	23270000	0	0	0	139130000	0
P26039	Talin-1	Tln1	27.6	25.3	269.82	2541	0	201.89	10.9	12.1	11.2	6.7	20	3.4	4046300	4083000	4770200	179000	15123000	413840	76886000	140920000	113740000	58116000	502340000	63374000
P26041	Moesin	Msn	18.7	14.9	67.766	577	0	15.755	10.9	6.8	0	1.4	3.6	0	846670	1827700	0	186870	737270	0	21329000	19517000	0	0	0	0
P26262	Plasma kallikrein;Plasma kallikrein heavy chain;Plasma kallikrein light chain	Klkb1	44.5	43.4	71.382	638	0	130.98	34.6	38.6	31	17.1	21.3	13.8	117160000	84752000	61007000	21208000	26986000	18599000	1698099999.9999998	1589799999.9999998	1315600000	1107200000	1234500000	822730000
P27656	Hepatic triacylglycerol lipase	Lipc	26.1	26.1	57.388	510	0	52.536	24.3	20.6	17.5	5.7	0	0	14230000	6392800	12149000	656540	0	0	176780000	139160000	106320000	0	0	0
P28665	Murinoglobulin-1	Mug1	68.8	42.4	165.3	1476	0	323.31	57.6	55.8	65.2	39	43.8	38.1	314350000	215560000	1079600000	120380000	220400000	173580000	1411800000	1616199999.9999998	4353200000	1090100000	1758899999.9999998	1856899999.9999998
P28666	Murinoglobulin-2	Mug2	50.3	28.5	162.38	1451	0	306.25	49	42.9	48.4	25.9	20.3	23.2	15433000	12985000	40988000	3882900	2209100	1278100	435480000	361720000	692090000	219860000	75058000	161640000
P29699	Alpha-2-HS-glycoprotein	Ahsg	65.5	65.5	37.325	345	0	323.31	62	65.5	62	48.4	48.4	53.6	5425100000	4978500000	5643900000	1636699999.9999998	3784099999.9999995	3344899999.9999995	13814000000	20941000000	14928000000	11413000000	19134000000	20395000000
P29788	Vitronectin	Vtn	43.1	43.1	54.848	478	0	274.54	41.6	33.3	33.7	27.4	35.6	33.9	1291000000	1128200000	1204300000	649320000	824480000	939260000	5744700000	6625599999.999999	5239000000	5929999999.999999	6396099999.999999	9364800000
P31532	Serum amyloid A-4 protein	Saa4	53.1	53.1	15.088	130	0	38.734	46.2	31.5	46.2	46.2	33.1	39.2	40698000	33973000	141660000	59245000	40558000	32398000	86731000	100060000	219450000	221870000	244250000	342820000
P32261	Antithrombin-III	Serpinc1	58.7	58.7	52.003	465	0	313.43	49.9	58.7	50.3	37	27.3	33.1	295060000	181830000	229830000	57971000	62960000	47657000	1290200000	1003199999.9999999	1495399999.9999998	1097100000	1250500000	1248200000
P33587	Vitamin K-dependent protein C;Vitamin K-dependent protein C light chain;Vitamin K-dependent protein C heavy chain;Activation peptide	Proc	39.8	39.8	51.818	460	0	307.45	34.1	32.4	34.3	24.8	29.6	19.1	89310000	112150000	152380000	74952000	200950000	195180000	231790000	374860000	368120000	448960000	855490000	1170200000
P34928	Apolipoprotein C-I;Truncated apolipoprotein C-I	Apoc1	40.9	40.9	9.6963	88	0	18.438	38.6	26.1	33	30.7	20.5	18.2	1053899999.9999999	416680000	836490000	339730000	472600000	346760000	1203200000	1118700000	1453100000	911220000	953860000	720890000
P35441	Thrombospondin-1	Thbs1	69.3	67.4	129.65	1170	0	323.31	62	63.2	64.3	47.5	61.7	52.4	2762800000	2202500000	2212300000	985040000	2960299999.9999995	1662799999.9999998	7087699999.999999	8263299999.999999	6484199999.999999	6634499999.999999	14885000000	10749000000
P39039	Mannose-binding protein A	Mbl1	52.7	52.7	25.396	239	0	288.97	52.7	36.4	49.8	39.3	32.6	28.5	1062299999.9999999	213080000	208090000	175000000	60337000	33340000	2144899999.9999998	1593599999.9999998	1247800000	686010000	367640000	362290000
P39876	Metalloproteinase inhibitor 3	Timp3	56.4	56.4	24.182	211	0	176.56	48.8	53.1	47.4	28.4	43.1	34.6	615160000	549850000	525910000	114300000	462630000	231040000	1347900000	1513999999.9999998	930310000	610720000	1727899999.9999998	1274900000
P41317	Mannose-binding protein C	Mbl2	46.3	46.3	25.957	244	0	118.83	35.7	32.4	34	19.3	19.3	25.8	219790000	111720000	168010000	29034000	33584000	16808000	392220000	241100000	258910000	162550000	168020000	133170000
P42703	Leukemia inhibitory factor receptor	Lifr	25.8	25.8	122.57	1092	0	130.69	15.5	22.4	21.6	0	0	0	9580300	13742000	18680000	0	0	0	101620000	118490000	155270000	0	0	0
Q8CFZ6	Tetranectin	Clec3b	57.9	57.9	22.255	202	0	323.31	57.9	57.9	56.9	29.2	40.6	13.9	488030000	401340000	327330000	68795000	100580000	9090500	1040299999.9999999	1018699999.9999999	639130000	371920000	450240000	0
P46412	Glutathione peroxidase 3	Gpx3	50	50	25.424	226	0	48.798	46.5	42.5	42.5	15.9	25.7	11.5	151720000	126140000	146830000	112130000	218750000	26666000	605600000	629150000	416090000	896730000	1160700000	359430000
P47878	Insulin-like growth factor-binding protein 3	Igfbp3	20.9	20.9	31.687	292	0	14.346	14	9.2	17.8	6.2	3.4	0	18576000	12543000	16561000	2326500	845470	0	118670000	93114000	77988000	78622000	0	0
P49182	Heparin cofactor 2	Serpind1	23	23	54.496	478	0	68.306	20.1	9.8	13.4	8.4	13.2	4.2	14477000	6376400	9477200	3352200	2967700	4746700	77286000	77480000	116870000	0	80451000	113750000
P50228	C-X-C motif chemokine 5;GCP-2(1-78);GCP-2(9-78)	Cxcl5	9.8	9.8	14.235	132	0.002924	3.8799	9.1	9.8	0	0	0	9.1	2804800	3779600	0	0	0	3175700	0	0	0	0	0	0
P50580	Proliferation-associated protein 2G4	Pa2g4	9.6	9.6	43.698	394	0.0030303	4.3848	3	0	0	0	6.6	0	0	0	0	0	848100	0	0	0	0	0	0	0
P51885	Lumican	Lum	34	34	38.265	338	0	50.128	34	24	28.1	9.8	11.5	0	32486000	24027000	42221000	2096200	1853500	0	126620000	111560000	188950000	35456000	87578000	0
P51910	Apolipoprotein D	Apod	35.4	35.4	21.53	189	0	34.084	6.3	12.7	26.5	29.1	35.4	35.4	14043000	17033000	75638000	66261000	327380000	98602000	0	133720000	312320000	611580000	1558299999.9999998	847440000
P52430	Serum paraoxonase/arylesterase 1	Pon1	48.5	48.5	39.565	355	0	203.83	36.1	35.8	34.4	17.7	9.6	0	42192000	30813000	38359000	12475000	11975000	0	194850000	157100000	245810000	119690000	152650000	0
P52480	Pyruvate kinase PKM	Pkm	50.5	50.5	57.844	531	0	93.61	36.7	16.2	20.2	20.3	17.9	2.6	2596900	1990800	4799600	3426900	3683400	785720	64153000	71181000	36518000	79942000	111890000	0
P55065	Phospholipid transfer protein	Pltp	26.4	26.4	54.452	493	0	26.903	26.4	13.8	7.5	0	2.4	0	15416000	5662900	10658000	0	864700	0	66987000	75579000	48305000	0	0	0
P63260	Actin, cytoplasmic 2;Actin, cytoplasmic 2, N-terminally processed;Actin, cytoplasmic 1;Actin, cytoplasmic 1, N-terminally processed	Actg1;Actb	54.9	30.9	41.792	375	0	140.82	46.9	46.1	46.9	19.5	38.7	25.3	71316000	42577000	97341000	26938000	116370000	19363000	150210000	203090000	211400000	255350000	749090000	340900000
Q8BII9	Thyroxine-binding globulin	Serpina7	6.6	6.6	32.676	287	0	6.2289	0	0	0	0	0	6.6	0	0	0	0	0	622870	0	0	0	0	0	0
P62806	Histone H4	Hist1h4a	20.4	20.4	11.367	103	0	4.7745	0	0	0	0	9.7	20.4	0	0	0	0	4390100	10125000	0	0	0	0	0	0
P62827	GTP-binding nuclear protein Ran;GTP-binding nuclear protein Ran, testis-specific isoform	Ran;1700009N14Rik;Rasl2-9	27.8	27.8	24.423	216	0	24.166	22.7	17.6	14.4	19	13.9	0	25825000	4766600	9479700	17290000	6118600	0	80381000	66966000	28285000	90197000	62985000	0
P62915	Transcription initiation factor IIB	Gtf2b	9.5	9.5	34.819	316	0.0081744	3.1181	0	4.4	0	0	5.1	0	0	3201900	0	0	853340	0	0	0	0	0	0	0
P62962	Profilin-1;Profilin	Pfn1	45.7	45.7	14.957	140	0	36.347	21.4	39.3	20	0	37.9	0	7540800	14851000	8598100	0	39733000	0	31613000	36108000	33129000	0	176670000	0
Q504P4	Heat shock cognate 71 kDa protein	Hspa8	6.7	6.7	68.778	627	0	5.0668	4.8	2.2	0	1.9	0	0	705760	338900	0	178500	0	0	0	0	0	0	0	0
P63101	14-3-3 protein zeta/delta	Ywhaz	17.6	13.5	27.771	245	0.0030864	4.6454	0	0	9.8	0	7.8	0	0	0	3351400	0	1119500	0	0	0	0	0	0	0
P68134	Actin, alpha skeletal muscle;Actin, alpha cardiac muscle 1;Actin, gamma-enteric smooth muscle;Actin, aortic smooth muscle	Acta1;Actc1;Actg2;Acta2	28.1	4.2	42.051	377	0.0079156	2.8689	26	25.5	26	13.3	18.3	15.9	26015000	22269000	24908000	0	0	0	0	0	0	0	0	0
P70274	Selenoprotein P	Sepp1	29.7	29.7	42.705	380	0	29.44	15	21.6	16.6	3.2	0	2.6	15714000	4648000	5624700	350820	0	724090	169330000	91154000	199690000	0	0	0
P70375	Coagulation factor VII;Factor VII light chain;Factor VII heavy chain	F7	39.9	39.9	50.276	446	0	62.322	31.6	20.2	22.4	4.5	14.3	18.2	38280000	15663000	34871000	4417900	13746000	16796000	163680000	332330000	166330000	81891000	151760000	263400000
Q3UXJ2	Transforming growth factor-beta-induced protein ig-h3	Tgfbi	17.2	17.2	70.912	651	0	19.511	11.4	6.9	5.7	0	1.8	0	776850	2498500	936690	0	347670	0	34524000	24782000	0	0	0	0
P97290	Plasma protease C1 inhibitor	Serping1	31	31	55.584	504	0	107.01	26	18.8	31	6.5	4.6	4.6	102820000	51167000	99745000	8212100	4306600	3705900	656640000	312990000	864140000	181830000	152020000	90857000
P97298	Pigment epithelium-derived factor	Serpinf1	51.6	51.6	46.233	417	0	323.31	47.2	51.6	43.6	38.1	26.6	36.5	690500000	484140000	571970000	178310000	30956000	130400000	1469799999.9999998	1330900000	1147400000	976090000	412170000	731320000
P97333	Neuropilin-1	Nrp1	2.3	2.3	103	923	0.0083565	3.3549	0	0	2.3	0	0	0	0	0	572270	0	0	0	0	0	0	0	0	0
P98064	Mannan-binding lectin serine protease 1;Mannan-binding lectin serine protease 1 heavy chain;Mannan-binding lectin serine protease 1 light chain	Masp1	46.9	46.9	79.967	704	0	171.4	40.5	26.1	39.5	29.1	17.3	13.1	44512000	11273000	50466000	23771000	17716000	15768000	203760000	185090000	225210000	266220000	203220000	173570000
P98086	Complement C1q subcomponent subunit A	C1qa	40.4	40.4	25.974	245	0	234.93	37.6	37.6	37.6	40.4	37.6	40.4	1308500000	849150000	881240000	1017399999.9999999	1007499999.9999999	1000599999.9999999	3538299999.9999995	4066299999.9999995	2386700000	6565999999.999999	5301100000	7154699999.999999
Q00623	Apolipoprotein A-I;Proapolipoprotein A-I;Truncated apolipoprotein A-I	Apoa1	85.2	85.2	30.615	264	0	323.31	81.8	84.5	84.5	74.6	74.2	78	8908800000	4677700000	15248000000	3643999999.9999995	5796500000	3375299999.9999995	12631000000	10603000000	20428000000	11827000000	18180000000	11153000000
Q00896	Alpha-1-antitrypsin 1-3	Serpina1c	61.9	7.3	45.823	412	0	323.31	54.6	60.7	61.9	44.2	34.2	44.2	1982599999.9999998	1684499999.9999998	4782300000	418510000	358610000	462560000	5621900000	5745900000	11477000000	3025399999.9999995	2597700000	3231499999.9999995
Q00897	Alpha-1-antitrypsin 1-4	Serpina1d	45.8	12.8	45.998	413	0	43.738	41.6	43.3	45.8	36.8	33.2	40.7	49238000	26395000	95304000	13096000	39310000	39634000	372280000	248010000	865670000	193580000	577120000	705750000
Q01149	Collagen alpha-2(I) chain	Col1a2	3.6	3.6	129.56	1372	0	5.9074	0.7	0	3.6	0	0	0	387800	0	1464300	0	0	0	0	0	0	0	0	0
Q01279	Epidermal growth factor receptor	Egfr	22.1	22.1	134.85	1210	0	93.643	14.1	11.8	22.1	2	2.1	2.8	10566000	6783600	38383000	377330	537370	1470400	100610000	115100000	482170000	16643000	13963000	26310000
Q01339	Beta-2-glycoprotein 1	Apoh	64.9	64.9	38.618	345	0	210.54	61.7	48.4	56.5	36.8	37.7	33.9	343680000	210250000	346790000	72476000	143550000	62385000	1216200000	957910000	1097500000	885760000	1270900000	903800000
Q02105	Complement C1q subcomponent subunit C	C1qc	39	39	25.991	246	0	149.9	34.1	21.1	21.1	26	26	39	443770000	358700000	395640000	538310000	420330000	526790000	3313099999.9999995	3436199999.9999995	2474500000	7220799999.999999	5220600000	8287099999.999999
Q05020	Apolipoprotein C-II	Apoc2	21.6	21.6	10.741	97	0	62.558	21.6	21.6	21.6	0	0	0	125140000	83140000	118510000	0	0	0	0	0	0	0	0	0
Q06770	Corticosteroid-binding globulin	Serpina6	24.9	24.9	44.769	397	0	36.845	24.9	18.1	22.9	14.4	9.6	0	17269000	5878900	21981000	465300	4686700	0	229240000	144430000	209700000	118740000	54503000	0
Q06890	Clusterin;Clusterin beta chain;Clusterin alpha chain	Clu	38.8	38.8	51.655	448	0	193.2	37.5	38.8	37.5	35.7	35.5	27.7	348200000	310280000	615450000	207790000	354170000	382080000	851720000	1168600000	1541099999.9999998	1174200000	1830299999.9999998	2491000000
Q07079	Insulin-like growth factor-binding protein 5	Igfbp5	11.8	11.8	30.372	271	0	14.273	11.8	7.4	7.4	0	0	0	6593700	14249000	10625000	0	0	0	75601000	0	42388000	0	0	0
Q07235	Glia-derived nexin	Serpine2	28.5	28.5	44.207	397	0	22.363	13.9	12.8	12.8	2	6	0	3943800	1775200	8873700	1005300	2409500	0	0	0	0	0	0	0
Q07456	Protein AMBP;Alpha-1-microglobulin;Inter-alpha-trypsin inhibitor light chain;Trypstatin	Ambp	43.6	43.6	39.029	349	0	103.51	28.4	22.9	20.9	16	27.5	24.1	188180000	84087000	148470000	70275000	119240000	140390000	641770000	535730000	462450000	1032799999.9999999	1309400000	1597999999.9999998
Q07968	Coagulation factor XIII B chain	F13b	19.1	19.1	76.195	669	0	22.374	12.3	7.6	14.6	4.5	4.6	3	4513000	1894200	8077700	745150	1722600	1055100	59081000	50607000	68961000	48830000	41827000	46680000
Q08761	Vitamin K-dependent protein S	Pros1	20.9	20.9	74.934	675	0	57.402	15.3	16.1	9.5	6.8	8.3	11	13685000	6957300	6255800	2693200	13459000	9943700	112080000	160410000	124170000	90245000	203050000	275040000
Q08879	Fibulin-1	Fbln1	6	6	78.032	705	0	7.1558	3	4.4	4.5	1.4	0	1.4	738570	1627500	1595000	1157600	0	267200	40024000	30756000	40561000	0	0	0
Q19LI2	Alpha-1B-glycoprotein	A1bg	52.5	52.5	56.553	512	0	228.93	43.8	47.9	0	0	0	0	391480000	472260000	0	0	0	0	1055099999.9999999	1609099999.9999998	0	0	0	0
Q3UER8	Fibrinogen gamma chain	Fgg	39.5	39.5	50.349	443	0	94.815	18.5	11.1	9	25.3	22.6	9.5	16903000	8470100	615350	41409000	31201000	6950100	81129000	30727000	27862000	398720000	361400000	85772000
Q4LDF6		Cfhr2	55.4	24.1	37.932	332	0	38.264	51.2	41.9	28	33.4	37.7	23.5	40854000	17431000	14067000	1436400	3238200	0	118040000	73017000	76521000	0	68427000	0
Q5FW60	Major urinary protein 20;Major urinary protein 4;Major urinary protein 3	Mup20;Mup21;Mup3;Mup4	11.6	11.6	20.93	181	0.0084746	3.4522	0	0	11.6	0	0	0	0	0	6233500	0	0	0	0	0	0	0	0	0
Q60590	Alpha-1-acid glycoprotein 1	Orm1	38.6	21.3	23.895	207	0	70.581	38.2	38.6	38.6	24.2	20.3	30.9	102450000	48744000	91477000	222050000	82810000	374950000	310180000	382070000	321250000	1506499999.9999998	1307300000	2265700000
Q60790	Ras GTPase-activating protein 3	Rasa3	6.1	6.1	95.986	834	0	6.3271	0	0	0	0	6.1	0	0	0	0	0	490000	0	0	0	0	0	0	0
Q60963	Platelet-activating factor acetylhydrolase	Pla2g7	15	15	49.258	440	0	11.513	5	0	3.2	3.2	10	0	1698000	0	1771700	714290	6116900	0	0	0	0	0	0	0
Q60994	Adiponectin	Adipoq	14.6	14.6	26.809	247	0	11.027	3.6	0	0	6.1	10.9	0	6338900	0	0	3046600	1836000	0	0	0	0	0	0	0
Q61129	Complement factor I;Complement factor I heavy chain;Complement factor I light chain	Cfi	39.3	39.3	67.26	603	0	226.72	30.7	31.2	30.8	18.6	15.9	18.9	126830000	74468000	91938000	28926000	35279000	30926000	677320000	501400000	545360000	445990000	533480000	448850000
Q61247	Alpha-2-antiplasmin	Serpinf2	32.4	32.4	54.971	491	0	143.75	22	14.5	27.1	16.5	17.7	14.5	12154000	2898100	30986000	16407000	11942000	12115000	156280000	159650000	230360000	257110000	211310000	212850000
Q61268	Apolipoprotein C-IV	Apoc4	16.1	16.1	14.288	124	0	5.7076	16.1	16.1	16.1	16.1	16.1	8.9	343770000	131440000	181030000	98332000	78782000	48890000	303910000	198450000	232000000	242390000	275450000	0
Q61406		Cfhr1	41.7	41.7	38.443	343	0	61.451	35.9	29.7	22.7	12.2	6.1	10.8	176840000	96380000	133360000	31303000	39224000	24106000	392410000	341130000	287210000	274580000	241400000	238020000
Q61508	Extracellular matrix protein 1	Ecm1	30.6	25.2	62.832	559	0	69.968	16.8	23.6	14	18.1	8.4	12.7	53230000	29821000	31719000	23397000	9188400	15270000	204700000	155950000	140370000	245610000	158360000	217980000
Q61646	Haptoglobin;Haptoglobin alpha chain;Haptoglobin beta chain	Hp	59.4	59.4	38.752	347	0	315.33	0	0	0	42.9	0	55.9	0	0	0	494280000	0	1225400000	0	0	0	2521400000	0	6428299999.999999
Q61702	Inter-alpha-trypsin inhibitor heavy chain H1	Itih1	43.1	43.1	101.07	907	0	323.31	40.6	34	37.6	20.7	24.9	19.8	141690000	59011000	96071000	26732000	22355000	32314000	777170000	611540000	588680000	483480000	359190000	507250000
Q61704	Inter-alpha-trypsin inhibitor heavy chain H3	Itih3	34.2	34.2	99.357	889	0	306.26	12.5	24	16.9	24.1	19.2	21.7	11080000	9697000	19430000	28026000	40795000	28393000	229600000	313760000	337330000	1041799999.9999999	1053099999.9999999	1598899999.9999998
Q61805	Lipopolysaccharide-binding protein	Lbp	36.2	36.2	53.055	481	0	103.61	30.1	20.6	24.5	16.6	19.5	16.8	35118000	26909000	27208000	36273000	31870000	32044000	190660000	159100000	97518000	290470000	268700000	318130000
Q61838	Alpha-2-macroglobulin;Alpha-2-macroglobulin 165 kDa subunit;Alpha-2-macroglobulin 35 kDa subunit	A2m	65.7	65.2	165.85	1495	0	323.31	61.7	63.2	58.6	44.3	47.3	40.9	646670000	424530000	886430000	395270000	506610000	316110000	3728199999.9999995	3643699999.9999995	4771600000	3360899999.9999995	3806599999.9999995	3855399999.9999995
Q62009	Periostin	Postn	22.4	22.4	93.142	838	0	34.687	11.6	12.4	3.8	1.7	5.3	0	2203500	1604100	409660	381010	1916500	0	66331000	64836000	0	0	0	0
Q6GSS7	Histone H2A type 2-A;Histone H2A type 2-C;Histone H2A;Histone H2A type 3;Histone H2A type 1-K;Histone H2A type 1-F;Histone H2A.J;Histone H2A type 1-H	Hist2h2aa1;Hist2h2ac;Hist1h2aa;Hist3h2a;Hist1h2ak;Hist1h2af;H2afj;Hist1h2ah	28.5	28.5	14.095	130	0	22.309	0	0	0	0	14.6	28.5	0	0	0	0	4198900	15212000	0	0	0	0	0	0
Q64726	Zinc-alpha-2-glycoprotein	Azgp1	44.3	44.3	35.332	307	0	120.33	34.5	26.4	39.7	12.7	30.9	14.7	27775000	23682000	55628000	5529800	32464000	16528000	130040000	118790000	221690000	90081000	196120000	136750000
Q64727	Vinculin	Vcl	5.9	5.9	116.72	1066	0	7.8093	0	0	0	0.9	5.9	0	0	0	0	33453	670950	0	0	0	0	0	0	0
Q66VB7		Gm1553	24.5	24.5	10.459	94	0.0057803	3.8156	24.5	0	12.8	0	0	0	4595700	0	3167600	0	0	0	0	0	0	0	0	0
Q6S9I0		Kng2	40.4	4.2	47.887	433	0	43.387	33.7	11.1	21	18.2	12	15.7	91270000	38949000	171620000	172170000	161160000	247270000	787180000	0	860410000	1720099999.9999998	1408500000	2584700000
Q6YGZ1	Heparanase;Heparanase 8 kDa subunit;Heparanase 50 kDa subunit	Hpse	6.9	6.9	60.065	535	0	5.8339	5	5	3.2	0	0	0	826480	926790	1868700	0	0	0	0	0	0	0	0	0
Q792Z0		Prss3	4.1	4.1	26.183	246	0.008427	3.389	4.1	4.1	4.1	4.1	4.1	4.1	1665499999.9999998	1203200000	1198300000	926430000	555320000	899930000	0	0	0	0	0	0
Q80YC5	Coagulation factor XII;Coagulation factor XIIa heavy chain;Coagulation factor XIIa light chain	F12	23.1	23.1	65.701	597	0	76.142	20.8	17.9	17.8	6.9	8.2	4.9	68172000	27057000	56148000	13546000	22008000	9642400	377050000	245170000	289940000	197360000	225060000	119940000
Q80YX1	Tenascin	Tnc	15.3	15.3	231.8	2110	0	94.908	13.2	3.3	5.8	2.8	0	0	2179000	1023300	2768200	325900	0	0	86163000	19836000	35557000	42352000	0	0
Q8BH35	Complement component C8 beta chain	C8b	45.2	45.2	66.229	589	0	205.2	34	32.1	37	14.4	11.4	15.4	52555000	34284000	156600000	8841000	4264300	13674000	483270000	398260000	842340000	160030000	97942000	168980000
Q8BH61	Coagulation factor XIII A chain	F13a1	23.5	23.5	83.206	732	0	64.378	11.2	13.1	8.3	6.7	7.1	0	10759000	3010700	4186800	1072300	448980	0	69706000	65786000	56217000	61082000	0	0
Q8BND5	Sulfhydryl oxidase 1	Qsox1	30.2	30.2	82.784	748	0	97.139	26.5	21.3	26.5	18.2	10.8	9	40760000	18595000	23771000	8049600	8319700	2663200	219100000	168390000	139400000	180630000	160790000	123850000
Q9JHK5	Pleckstrin	Plek	48.3	48.3	39.9	350	0	124.92	34	42.6	33.4	8	33.4	0	89224000	138710000	2681800	6275500	25963000	0	215050000	453540000	309410000	52527000	369190000	0
Q8CFG9	Complement C1r-B subcomponent;Complement C1r-B subcomponent heavy chain;Complement C1r-B subcomponent light chain	C1rb	56.7	3.8	79.935	706	0	118.29	48.4	50.6	44.8	32.6	39.7	36	5445400	2324400	25342000	0	0	0	975350000	826030000	0	0	0	0
Q8CG16	Complement C1r-A subcomponent;Complement C1r-A subcomponent heavy chain;Complement C1r-A subcomponent light chain	C1ra	66.6	14.9	80.072	707	0	323.31	56.7	58.8	51.9	39.5	43.6	40.3	261250000	159750000	139350000	85011000	98903000	55929000	842370000	757500000	505300000	714480000	495380000	550730000
Q8HWB2		H2-Q4	15.8	2.3	39.617	354	0.0029586	3.9414	11.9	13	11.9	6.8	4	6.8	705870	341650	305770	0	0	0	0	0	0	0	0	0
Q8K0E8	Fibrinogen beta chain;Fibrinopeptide B;Fibrinogen beta chain	Fgb	57.2	57.2	54.752	481	0	217	28.3	8.7	6.4	49.9	45.5	22	13790000	1910800	544750	86762000	40348000	8954400	56691000	7231300	3832500	469790000	390340000	100160000
Q8K1B8	Fermitin family homolog 3	Fermt3	42	42	75.634	665	0	88.238	22.9	30.8	25.6	4.5	25.6	0	9970600	10057000	12009000	1546800	30743000	0	73086000	112980000	82856000	20424000	284180000	0
Q8K1I3	Secreted phosphoprotein 24	Spp2	49.3	49.3	23.136	203	0	115.92	46.8	43.3	46.8	14.8	14.8	30	278720000	180970000	210280000	51640000	37979000	144590000	520270000	613310000	381340000	347020000	159940000	641300000
Q8K561	Otoancorin	Otoa	0.8	0.8	126.43	1137	1	-2	0	0	0.8	0	0	0	0	0	0	0	0	0	0	0	0	0	0	0
Q8R121	Protein Z-dependent protease inhibitor	Serpina10	42.2	42.2	51.797	448	0	126.25	32.4	32.8	34.8	16.3	18.3	15	77223000	57295000	103700000	28794000	38875000	74462000	317280000	377850000	420610000	330080000	547300000	836020000
Q8VCG4	Complement component C8 gamma chain	C8g	68.8	68.8	22.508	202	0	96.956	39.6	53	49.5	28.2	17.3	17.3	2721500	6612200	9285400	6052600	4564800	3235400	259170000	244240000	577150000	184770000	253760000	227040000
Q8VCS0	N-acetylmuramoyl-L-alanine amidase	Pglyrp2	14.5	14.5	57.706	530	0	13.518	9.1	8.9	10.8	4	6.2	0	2768100	3321100	4042200	2639800	2752000	0	41412000	55761000	50832000	0	116380000	0
Q8VCU2	Phosphatidylinositol-glycan-specific phospholipase D	Gpld1	40.7	40.7	93.622	842	0	259.86	32.8	30	33.1	15.8	12.5	8.2	24308000	18311000	32596000	6755400	15112000	3978000	333360000	342790000	353150000	246740000	307400000	149100000
Q8VDD5	Myosin-9	Myh9	50.5	49.6	226.37	1960	0	323.31	27.4	30.7	35.4	17.6	39.3	10.5	6188000	7527200	16321000	4282400	31440000	1758900	107900000	171030000	182080000	146930000	560760000	95015000
Q91VB8	Hemoglobin subunit alpha	haemaglobin alpha 2;Hba	91.5	85.2	15.112	142	0	93.986	63.4	91.5	69	50.7	47.9	42.3	1411200000	911400000	1782799999.9999998	1009499999.9999999	1741399999.9999998	91268000	7352899999.999999	5733600000	4651100000	7139999999.999999	7725699999.999999	580260000
Q91WP0	Mannan-binding lectin serine protease 2;Mannan-binding lectin serine protease 2 A chain;Mannan-binding lectin serine protease 2 B chain	Masp2	42	42	75.516	685	0	75.806	32.6	29.2	35.5	13.6	17.4	8	26507000	6219800	20857000	5285000	11436000	1856700	205590000	161530000	160510000	118900000	190000000	49382000
Q91WP6	Serine protease inhibitor A3N	Serpina3n	54.5	39.7	46.717	418	0	323.31	50	50.5	48.6	38.5	47.1	40.9	546270000	331150000	472500000	523440000	985750000	626720000	1149300000	1003499999.9999999	1014199999.9999999	2525800000	4409100000	3712399999.9999995
Q91X72	Hemopexin	Hpx	63	63	51.317	460	0	323.31	48.7	53.5	48.5	50.4	49.1	57	559690000	357630000	760700000	1085700000	1464299999.9999998	1517699999.9999998	1851299999.9999998	1560399999.9999998	2883600000	6168599999.999999	6873399999.999999	9211100000
Q91XL1		Lrg1	19.9	19.9	37.431	342	0	21.469	10.8	19.9	10.8	7	15.8	12.9	4897600	21803000	22710000	29167000	41059000	49640000	48494000	57289000	172240000	142590000	249600000	365310000
Q91Y47	Coagulation factor XI;Coagulation factor XIa heavy chain;Coagulation factor XIa light chain	F11	24	22.9	69.788	624	0	23.74	17.8	4.2	13.5	2.7	0	1.1	5590600	1796000	3403700	777470	0	0	69742000	64546000	58233000	0	0	0
Q921I1	Serotransferrin	Tf	76.8	50.2	76.723	697	0	323.31	75	73	75	69.7	69.4	68.3	3141599999.9999995	2230200000	4669500000	1861699999.9999998	1544799999.9999998	1774299999.9999998	7245099999.999999	7035499999.999999	9221100000	7503599999.999999	6217599999.999999	8645300000
Q99JI6	Ras-related protein Rap-1b;Ras-related protein Rap-1A	Rap1b;Rap1a	25.5	25.5	20.825	184	0	26.687	7.1	17.4	25.5	0	21.2	0	9814500	14040000	22062000	0	19473000	0	0	62334000	42641000	0	143490000	0
Q99JW4	LIM and senescent cell antigen-like-containing domain protein 1	Lims1	10.5	10.5	37.24	325	0	13.229	7.1	0	3.7	0	7.1	0	2702300	0	3908700	0	7626300	0	0	0	0	0	0	0
Q99MQ4	Asporin	Aspn	4.8	4.8	42.572	373	0.0078329	2.8376	2.7	0	2.1	0	0	0	735150	0	226170	0	0	0	0	0	0	0	0	0
Q9CQ19	Myosin regulatory light polypeptide 9	Myl9	41.3	29.1	19.854	172	0	22.498	11.6	29.1	23.8	0	23.8	0	4402000	3259700	9699200	0	34048000	0	0	70722000	36452000	0	107980000	0
Q9CQW3	Vitamin K-dependent protein Z	Proz	43.9	43.9	44.304	399	0	291.49	42.1	29.3	38.8	25.1	35.1	19.8	224640000	226270000	109270000	125810000	243280000	210660000	606730000	933790000	680480000	863930000	1647599999.9999998	1805699999.9999998
Q9CZM2	60S ribosomal protein L15	Rpl15	6.9	6.9	24.146	204	0.0081081	3.0676	0	0	0	6.9	0	0	0	0	0	694330	0	0	0	0	0	0	0	0
Q9D3H2		Obp1a	25.2	20.2	18.469	163	0	7.5167	14.1	0	0	4.9	0	16	11539000	0	0	3354400	0	19144000	0	0	0	0	0	0
Q9DBB9	Carboxypeptidase N subunit 2	Cpn2	42.4	42.4	60.478	547	0	209.85	34.2	30.3	37.7	11.5	22.1	11.7	71341000	50984000	129710000	20269000	20267000	9966400	248310000	217720000	230960000	140040000	188110000	131670000
Q9DBD0	Inhibitor of carbonic anhydrase	Ica;1300017J02Rik	60.3	60.3	76.765	700	0	323.31	42	53.4	55	17.9	22.6	15.3	46686000	33819000	56903000	4205600	7145500	3743400	216880000	236080000	314360000	140510000	185840000	146060000
Q9EQI5		Ppbp	51.3	51.3	12.251	113	0	30.539	51.3	33.6	51.3	33.6	33.6	33.6	2193200000	1234800000	1144500000	666840000	1052599999.9999999	1144100000	4437800000	4071699999.9999995	3410999999.9999995	4380100000	7084899999.999999	6676299999.999999
Q9EQP2	EH domain-containing protein 4	Ehd4	5.2	5.2	61.48	541	0.0030488	4.4153	0	2.8	2.8	0	2.4	0	0	712640	705720	0	1057900	0	0	0	0	0	0	0
Q9JHH6	Carboxypeptidase B2	Cpb2	39.8	39.8	48.87	422	0	63.055	30.3	32.5	24.2	14.7	10.9	5.5	59220000	5290700	11376000	4712300	4845000	2607200	348530000	313050000	184880000	166630000	88722000	87831000
Q9JJH1	Ribonuclease 4	Rnase4	49.3	49.3	17.024	148	0	56.311	49.3	43.9	33.8	33.8	33.8	25.7	3614600	91667000	81972000	34468000	31094000	42928000	209450000	203390000	142800000	214590000	195470000	232570000
Q9JJN5	Carboxypeptidase N catalytic chain	Cpn1	59.7	59.7	51.845	457	0	323.31	53	58.2	53	40.9	36.1	18.6	85242000	92828000	140400000	55403000	73725000	34785000	415620000	417890000	494760000	403140000	447860000	474140000
Q9QUM0	Integrin alpha-IIb;Integrin alpha-IIb heavy chain;Integrin alpha-IIb light chain	Itga2b	6.7	6.7	112.68	1033	0	7.4433	0	2	0	0	4.6	0	0	503240	0	0	1002900	0	0	0	0	0	0	0
Q9QWK4	CD5 antigen-like	Cd5l	49.1	49.1	38.862	352	0	139.64	35.8	32.7	24.7	23.6	16.8	25	51582000	37698000	26144000	27290000	12011000	33205000	219550000	230960000	122100000	256610000	173040000	220490000
Q9QXC1	Fetuin-B	Fetub	34.8	34.8	42.712	388	0	76.577	21.6	21.6	23.7	24.2	19.3	18	35509000	27294000	8605700	38501000	37269000	38016000	168230000	199580000	257110000	383730000	402390000	391000000
Q9QZU3	Platelet glycoprotein V	Gp5	10.2	10.2	63.381	567	0	8.0224	7.1	6.5	7.1	0	0	0	2038600	769830	2849300	0	0	0	68623000	62149000	72399000	0	0	0
Q9R098	Hepatocyte growth factor activator;Hepatocyte growth factor activator short chain;Hepatocyte growth factor activator long chain	Hgfac	12.9	12.9	70.567	653	0	14.142	4.9	11.3	12.9	0	0	0	5216400	1647000	7766500	0	0	0	31994000	45833000	52483000	0	0	0
Q9R0G6	Cartilage oligomeric matrix protein	Comp	5.2	5.2	82.341	755	0	6.0402	5.2	0	0	0	0	0	508170	0	0	0	0	0	0	0	0	0	0	0
Q9R0P5	Destrin	Dstn	29.1	29.1	18.521	165	0	7.9836	21.8	13.9	13.9	7.3	21.8	0	4555500	2074600	5513300	124190	9851500	0	21319000	32217000	19988000	0	0	0
Q9R0Q1	Synaptotagmin-like protein 4	Sytl4	3.6	3.6	76.021	673	0.0029674	4.1256	0	0	0	0	3.6	0	0	0	0	0	357030	0	0	0	0	0	0	0
Q9R1E6	Ectonucleotide pyrophosphatase/phosphodiesterase family member 2	Enpp2	4.2	4.2	98.884	862	0	5.639	2.8	1.3	2.7	0	0	0	826920	1013000	1188300	0	0	0	0	0	0	0	0	0
Q9Z121	C-C motif chemokine 8	Ccl8	28.9	28.9	11.017	97	0	9.7715	28.9	0	12.4	0	0	0	8409200	0	7727800	0	0	0	0	0	0	0	0	0
Q9Z126	Platelet factor 4	Pf4	31.4	31.4	11.243	105	0	64.811	31.4	31.4	31.4	28.6	31.4	28.6	21496000000	17453000000	10359000000	3763399999.9999995	7201099999.999999	4373400000	33728000000	37263000000	18937000000	10718000000	17833000000	11158000000
Q9Z1R3	Apolipoprotein M	Apom	12.1	12.1	21.273	190	0	20.552	12.1	12.1	12.1	4.2	12.1	12.1	208960000	73072000	253580000	18054000	41585000	33128000	338130000	220590000	460400000	0	280630000	280260000
Q9Z204	Heterogeneous nuclear ribonucleoproteins C1/C2	Hnrnpc	8	8	34.384	313	0.0057637	3.8087	0	0	0	0	0	8	0	0	0	0	0	3432200	0	0	0	0	0	0

## Sheet: Amine_NPs_peptides
Sequence	N-term cleavage window	C-term cleavage window	Amino acid before	First amino acid	Second amino acid	Second last amino acid	Last amino acid	Amino acid after	A Count	R Count	N Count	D Count	C Count	Q Count	E Count	G Count	H Count	I Count	L Count	K Count	M Count	F Count	P Count	S Count	T Count	W Count	Y Count	V Count	U Count	O Count	Length	Missed cleavages	Mass	Proteins	Leading razor protein	Start position	End position	Gene names	Protein names	Unique (Groups)	Unique (Proteins)	Charges	PEP	Score	Experiment BN010	Experiment BN012	Experiment BN110	Experiment KBN002	Experiment KBN010
AAFGGSGGRGSSSGGGYSSGSSSYGSGGR	VSVTSSTISSNVASKAAFGGSGGRGSSSGG	GGYSSGSSSYGSGGRQSGSRGGSGGGGSIS	K	A	A	G	R	Q	2	2	0	0	0	0	0	12	0	0	0	0	0	1	0	10	0	0	2	0	0	0	29	1	2500.06	CON__P35908v2;CON__P35908	CON__P35908v2	516	544			yes	no	3	0.0035757	24.835	1				1
ACEPGVDYVYK	QQSQEKINLNVRLDKACEPGVDYVYKTELT	RLDKACEPGVDYVYKTELTNIELLDDFDEY	K	A	C	Y	K	T	1	0	0	1	1	0	1	1	0	0	0	1	0	0	1	0	0	0	2	2	0	0	11	0	1242.56	P01027;CON__Q2UVX4	P01027	1536	1546	C3	Complement C3;Complement C3 beta chain;C3-beta-c;Complement C3 alpha chain;C3a anaphylatoxin;Acylation stimulating protein;Complement C3b alpha chain;Complement C3c alpha chain fragment 1;Complement C3dg fragment;Complement C3g fragment;Complement C3d fragment;Complement C3f fragment;Complement C3c alpha chain fragment 2	no	no	2	0.0059731	84.213				2
AGQYSSDLR	RRRRSVQLMEKRMDKAGQYSSDLRKCCEDG	EKRMDKAGQYSSDLRKCCEDGMRDNPMKFP	K	A	G	L	R	K	1	1	0	1	0	1	0	1	0	0	1	0	0	0	0	2	0	0	1	0	0	0	9	0	995.467	CON__Q2UVX4	CON__Q2UVX4	681	689			yes	yes	2	0.020132	69.998
ALEESNYELEGK	QNLNDRLASYLDKVRALEESNYELEGKIKE	KVRALEESNYELEGKIKEWYEKHGNSHQGE	R	A	L	G	K	I	1	0	1	0	0	0	4	1	0	0	2	1	0	0	0	1	0	0	1	0	0	0	12	0	1380.64	CON__P13645;P02535;CON__P02535-1;A2A513	CON__P13645	166	177	Krt10	Keratin, type I cytoskeletal 10	yes	no	2	0.025258	72.321			1	1	1
AQGYSGLSVK	WKQVTQSYWDTNPTRAQGYSGLSVKVVNST	TNPTRAQGYSGLSVKVVNSTTGPGEHLRNA	R	A	Q	V	K	V	1	0	0	0	0	1	0	2	0	0	1	1	0	0	0	2	0	0	1	1	0	0	10	0	1008.52	P35441;Q80YQ1;CON__Q28194	P35441	1055	1064	Thbs1	Thrombospondin-1	no	no	2	4.1876E-05	98.582	2	1	1	2	2
AVADFLR	ETYCGLYPESEPEVKAVADFLRRNIDHIKA	PESEPEVKAVADFLRRNIDHIKAYISMHSY	K	A	V	L	R	R	2	1	0	1	0	0	0	0	0	0	1	0	0	1	0	0	0	0	0	1	0	0	7	0	790.434	Q9JHH6	Q9JHH6	290	296	Cpb2	Carboxypeptidase B2	no	no	2	0.033267	92.191			1
AVAEPGIQLK	WKQTEQTYWQATPFRAVAEPGIQLKAVKSK	ATPFRAVAEPGIQLKAVKSKTGPGEHLRNS	R	A	V	L	K	A	2	0	0	0	0	1	1	1	0	1	1	1	0	0	1	0	0	0	0	1	0	0	10	0	1024.59	Q9Z1T2;A0A1D5RMB8;Q9R0G6;CON__ENSEMBL:ENSBTAP00000006074	Q9Z1T2	830	839	Thbs4;Comp	Thrombospondin-4;Cartilage oligomeric matrix protein	no	no	2	0.00026833	107.9		1	2	1
DAEAWFNEK	NMRSQYEQLAEQNRKDAEAWFNEKSKELTT	AEQNRKDAEAWFNEKSKELTTEIDNNIEQI	K	D	A	E	K	S	2	0	1	1	0	0	2	0	0	0	0	1	0	1	0	0	0	1	0	0	0	0	9	0	1108.48	CON__P13645;CON__Q7Z3Y7;CON__Q7Z3Z0;CON__Q148H6;CON__Q7Z3Y8	CON__P13645	335	343			yes	no	2	0.013128	78.149					1
DDDYAGFVFGYQSSSR	NAVDFSGTFFINTERDDDYAGFVFGYQSSS	DDYAGFVFGYQSSSRFYVVMWKQVTQSYWD	R	D	D	S	R	F	1	1	0	3	0	1	0	2	0	0	0	0	0	2	0	3	0	0	2	1	0	0	16	0	1812.76	P35441;Q80YQ1;Q03350;CON__Q28194	P35441	1019	1034	Thbs1;Thbs2	Thrombospondin-1;Thrombospondin-2	no	no	2;3	0.0002561	132.5	2	3	3	2	1
DIENQYETQITQIEHEVSSSGQEVQSSAK	DMRQEYEQLIAKNRKDIENQYETQITQIEH	HEVSSSGQEVQSSAKEVTQLRHGVQELEIE	K	D	I	A	K	E	1	0	1	1	0	5	5	1	1	3	0	1	0	0	0	5	2	0	1	2	0	0	29	0	3263.51	CON__P35527	CON__P35527	340	368			yes	yes	3	1.1225E-15	62.848	1			2
DNCPFHYNPAQYDYDRDDVGDR	ACDDDDDNDKIPDDRDNCPFHYNPAQYDYD	NPAQYDYDRDDVGDRCDNCPYNHNPDQADT	R	D	N	D	R	C	1	2	2	6	1	1	0	1	1	0	0	0	0	1	2	0	0	0	3	1	0	0	22	1	2674.08	P35441;Q80YQ1;CON__Q28194	P35441	752	773	Thbs1	Thrombospondin-1	no	no	4	0.0011756	42.639			1		1
DSDGDGR	DDRDNCRLVPNPDQKDSDGDGRGDACKDDF	LVPNPDQKDSDGDGRGDACKDDFDHDNVPD	K	D	S	G	R	G	0	1	0	3	0	0	0	2	0	0	0	0	0	0	0	1	0	0	0	0	0	0	7	0	720.267	P35441;Q80YQ1;CON__Q28194	P35441	920	926	Thbs1	Thrombospondin-1	no	no	2	0.0068975	126.24	1	1		1
DSITTWEILAVSLSDK	EKNGISTKVMNIFLKDSITTWEILAVSLSD	SITTWEILAVSLSDKKGICVADPYEIRVMQ	K	D	S	D	K	K	1	0	0	2	0	0	1	0	0	2	2	1	0	0	0	3	2	1	0	1	0	0	16	0	1776.91	P01027;CON__Q2UVX4	P01027	797	812	C3	Complement C3;Complement C3 beta chain;C3-beta-c;Complement C3 alpha chain;C3a anaphylatoxin;Acylation stimulating protein;Complement C3b alpha chain;Complement C3c alpha chain fragment 1;Complement C3dg fragment;Complement C3g fragment;Complement C3d fragment;Complement C3f fragment;Complement C3c alpha chain fragment 2	no	no	2;3	0.0010437	105.65	3	3	4	4	4
DSITTWEILAVSLSDKK	EKNGISTKVMNIFLKDSITTWEILAVSLSD	ITTWEILAVSLSDKKGICVADPYEIRVMQD	K	D	S	K	K	G	1	0	0	2	0	0	1	0	0	2	2	2	0	0	0	3	2	1	0	1	0	0	17	1	1905.01	P01027;CON__Q2UVX4	P01027	797	813	C3	Complement C3;Complement C3 beta chain;C3-beta-c;Complement C3 alpha chain;C3a anaphylatoxin;Acylation stimulating protein;Complement C3b alpha chain;Complement C3c alpha chain fragment 1;Complement C3dg fragment;Complement C3g fragment;Complement C3d fragment;Complement C3f fragment;Complement C3c alpha chain fragment 2	no	no	2;3	5.5854E-06	105.39	9	7	12	10	4
DSLLQDGEFTMDLR	VNGLTLGGQKCSVIRDSLLQDGEFTMDLRT	RDSLLQDGEFTMDLRTKSTGGAPTFNVTVT	R	D	S	L	R	T	0	1	0	3	0	1	1	1	0	0	3	0	1	1	0	1	1	0	0	0	0	0	14	0	1638.76	Q5SX49;P62962;CON__P02584	Q5SX49	76	89	Pfn1	Profilin;Profilin-1	yes	no	2	8.3697E-28	145.91	1	1	2	1	2
DSPSVWAAVPGK	MADGTCQDAAIVGYKDSPSVWAAVPGKTFV	GYKDSPSVWAAVPGKTFVSITPAEVGVLVG	K	D	S	G	K	T	2	0	0	1	0	0	0	1	0	0	0	1	0	0	2	2	0	1	0	2	0	0	12	0	1212.61	Q5SX49;P62962;CON__P02584;J3QMC2	Q5SX49	27	38	Pfn1	Profilin;Profilin-1	yes	no	2	0.004562	83.948					1
DTDLDGFPDEK	VCAVGWAGNGLLCGRDTDLDGFPDEKLRCS	LCGRDTDLDGFPDEKLRCSERQCRKDNCVT	R	D	T	E	K	L	0	0	0	4	0	0	1	1	0	0	1	1	0	1	1	0	1	0	0	0	0	0	11	0	1250.53	Q9R0G6;CON__ENSEMBL:ENSBTAP00000006074	Q9R0G6	267	277	Comp	Cartilage oligomeric matrix protein	yes	no	2	0.0042327	89.247	2	1	1
DYQELMNTK	DALQQAKEDLARLLRDYQELMNTKLALDLE	LARLLRDYQELMNTKLALDLEIATYRTLLE	R	D	Y	T	K	L	0	0	1	1	0	1	1	0	0	0	1	1	1	0	0	0	1	0	1	0	0	0	9	0	1140.51	CON__P04264	CON__P04264	464	472			no	no	2	0.013216	92.439	1
ELQETNAALQDVR	GQIPLGGDLAPQMLRELQETNAALQDVREL	LRELQETNAALQDVRELLRQQVKEITFLKN	R	E	L	V	R	E	2	1	1	1	0	2	2	0	0	0	2	0	0	0	0	0	1	0	0	1	0	0	13	0	1485.74	Q9R0G6;CON__ENSEMBL:ENSBTAP00000006074;A0A1D5RM48	Q9R0G6	36	48	Comp	Cartilage oligomeric matrix protein	yes	no	2	0.0001532	110.39		1	2	2
EVALNTIIFMGR	RVTFKANRPFLVLIREVALNTIIFMGRVAN	LIREVALNTIIFMGRVANPCVN________	R	E	V	G	R	V	1	1	1	0	0	0	1	1	0	2	1	0	1	1	0	0	1	0	0	1	0	0	12	0	1362.73	P32261	P32261	447	458	Serpinc1	Antithrombin-III	no	no	2;3	1.5935E-11	131.11	3	1		2	2
EVVADSVWVDVK	RLVAYYTLIGASGQREVVADSVWVDVKDSC	GQREVVADSVWVDVKDSCIGTLVVKGDPRD	R	E	V	V	K	D	1	0	0	2	0	0	1	0	0	0	0	1	0	0	0	1	0	1	0	5	0	0	12	0	1344.69	P01027;CON__Q2UVX4	P01027	545	556	C3	Complement C3;Complement C3 beta chain;C3-beta-c;Complement C3 alpha chain;C3a anaphylatoxin;Acylation stimulating protein;Complement C3b alpha chain;Complement C3c alpha chain fragment 1;Complement C3dg fragment;Complement C3g fragment;Complement C3d fragment;Complement C3f fragment;Complement C3c alpha chain fragment 2	no	no	1;2;3	3.9763E-61	166.97	4	7	5	6	5
FDTISEK	GACNDTLKQLMEVFKFDTISEKTSDQIHFF	KQLMEVFKFDTISEKTSDQIHFFFAKLNCR	K	F	D	E	K	T	0	0	0	1	0	0	1	0	0	1	0	1	0	1	0	1	1	0	0	0	0	0	7	0	838.407	P32261;A0A0A6YWH7;A0A0A6YXS8;A0A0A6YX49	P32261	141	147	Serpinc1	Antithrombin-III	no	no	2	0.0078963	124.37	1	2	1	1
FLEQQNQVLQTKWELLQQVDTSTR	KSLNNQFASFIDKVRFLEQQNQVLQTKWEL	QTKWELLQQVDTSTRTHNLEPYFESFINNL	R	F	L	T	R	T	0	1	1	1	0	6	2	0	0	0	4	1	0	1	0	1	3	1	0	2	0	0	24	1	2931.51	CON__P04264	CON__P04264	200	223			yes	yes	3	5.9268E-05	44.632		2
FQMIPLDPK	ICPENFDISETDFRRFQMIPLDPKGTSQND	ETDFRRFQMIPLDPKGTSQNDPNWVVRHQG	R	F	Q	P	K	G	0	0	0	1	0	1	0	0	0	1	1	1	1	1	2	0	0	0	0	0	0	0	9	0	1087.57	P35441;CON__Q28194	P35441	960	968	Thbs1	Thrombospondin-1	no	no	2	0.012063	71.501
FSPENTR	VLVNTIYFKGLWKSKFSPENTRKEPFYKVD	FKGLWKSKFSPENTRKEPFYKVDGQSCPVP	K	F	S	T	R	K	0	1	1	0	0	0	1	0	0	0	0	0	0	1	1	1	1	0	0	0	0	0	7	0	849.398	P32261;A0A0A6YWH7	P32261	262	268	Serpinc1	Antithrombin-III	no	no	2	0.016236	97.071	2		1
FSSSSGYGGGSSR	YSRFSSSGGRGGGGRFSSSSGYGGGSSRVC	GRFSSSSGYGGGSSRVCGRGGGGSFGYSYG	R	F	S	S	R	V	0	1	0	0	0	0	0	4	0	0	0	0	0	1	0	6	0	0	1	0	0	0	13	0	1234.52	CON__P35527	CON__P35527	47	59			yes	yes	2	0.00014939	90.05	2	2	1	1	1
FTGSQPFGR	KNTDPGYNCLPCPPRFTGSQPFGRGVEHAM	LPCPPRFTGSQPFGRGVEHAMANKQVCKPR	R	F	T	G	R	G	0	1	0	0	0	1	0	2	0	0	0	0	0	2	1	1	1	0	0	0	0	0	9	0	995.482	P35441;Q80YQ1;CON__Q28194	P35441	624	632	Thbs1	Thrombospondin-1	no	no	2	1.2492E-07	176.29	2	2	1	2	2
FVFGTTPEDILR	GDVNDNFQGVLQNVRFVFGTTPEDILRNKG	NVRFVFGTTPEDILRNKGCSSSTNVLLTLD	R	F	V	L	R	N	0	1	0	1	0	0	1	1	0	1	1	0	0	2	1	0	2	0	0	1	0	0	12	0	1393.72	P35441;Q80YQ1;CON__Q28194	P35441	217	228	Thbs1	Thrombospondin-1	no	no	2	2.9135E-05	114.5	2	2	2	2	4
FYEGPELVADSNVVLDTAMR	WFLQHRPQVGYIRVRFYEGPELVADSNVVL	ELVADSNVVLDTAMRGGRLGVFCFSQENII	R	F	Y	M	R	G	2	1	1	2	0	0	2	1	0	0	2	0	1	1	1	1	1	0	1	3	0	0	20	0	2225.07	Q9R0G6	Q9R0G6	697	716	Comp	Cartilage oligomeric matrix protein	yes	yes	2	0.028403	38.366	1	1
FYHPDKEDGMLSK	VKVYSYYNLDETCIRFYHPDKEDGMLSKLC	IRFYHPDKEDGMLSKLCHKDTCRCAEENCF	R	F	Y	S	K	L	0	0	0	2	0	0	1	1	1	0	1	2	1	1	1	1	0	0	1	0	0	0	13	1	1565.72	CON__Q2UVX4	CON__Q2UVX4	1491	1503			yes	yes	2	0.0097479	80.706			1
GFSSGSAVVSGGSR	SCKSRGRGGGGGGFRGFSSGSAVVSGGSRR	RGFSSGSAVVSGGSRRSTSSFSCLSRHGGG	R	G	F	S	R	R	1	1	0	0	0	0	0	4	0	0	0	0	0	1	0	5	0	0	0	2	0	0	14	0	1253.6	CON__P35908v2;CON__P35908	CON__P35908v2	21	34			no	no	2	0.0020903	76.655				1
GGGGGGYGSGGSSYGSGGGSYGSGGGGGGGR	SVSTSHTTISGGGSRGGGGGGYGSGGSSYG	GGGSYGSGGGGGGGRGSYGSGGSSYGSGGG	R	G	G	G	R	G	0	1	0	0	0	0	0	21	0	0	0	0	0	0	0	6	0	0	3	0	0	0	31	0	2382.94	CON__P04264	CON__P04264	519	549			yes	yes	2	7.8805E-14	52.298	2	1	1	1	1
GGGGSFGYSYGGGSGGGFSASSLGGGFGGGSR	SSSGYGGGSSRVCGRGGGGSFGYSYGGGSG	FSASSLGGGFGGGSRGFGGASGGGYSSSGG	R	G	G	S	R	G	1	1	0	0	0	0	0	17	0	0	1	0	0	3	0	7	0	0	2	0	0	0	32	0	2704.15	CON__P35527	CON__P35527	64	95			yes	yes	3	1.3662E-19	55.406		1	1	1	1
GGSGGGGGGSSGGR	GHGSYGSGSSSGGYRGGSGGGGGGSSGGRG	RGGSGGGGGGSSGGRGSGGGSSGGSIGGRG	R	G	G	G	R	G	0	1	0	0	0	0	0	10	0	0	0	0	0	0	0	3	0	0	0	0	0	0	14	0	1005.42	CON__P04264	CON__P04264	589	602			yes	yes	2	0.040714	49.423			1
GGSGGGGGGSSGGRGSGGGSSGGSIGGR	GHGSYGSGSSSGGYRGGSGGGGGGSSGGRG	RGSGGGSSGGSIGGRGSSSGGVKSSGGSSS	R	G	G	G	R	G	0	2	0	0	0	0	0	18	0	1	0	0	0	0	0	7	0	0	0	0	0	0	28	1	2078.91	CON__P04264	CON__P04264	589	616			yes	yes	3	3.7828E-06	45.611			1
GGSGGGGSISGGGYGSGGGSGGR	GSSSYGSGGRQSGSRGGSGGGGSISGGGYG	ISGGGYGSGGGSGGRYGSGGGSKGGSISGG	R	G	G	G	R	Y	0	1	0	0	0	0	0	15	0	1	0	0	0	0	0	5	0	0	1	0	0	0	23	0	1740.74	CON__P35908v2;CON__P35908	CON__P35908v2	550	572			yes	no	2	1.0277E-07	58.461	1			1
GGSGGSHGGGSGFGGESGGSYGGGEEASGSGGGYGGGSGK	GGGSGGGYGGGSGSRGGSGGSHGGGSGFGG	EASGSGGGYGGGSGKSSHS___________	R	G	G	G	K	S	1	0	0	0	0	0	3	23	1	0	0	1	0	1	0	8	0	0	2	0	0	0	40	0	3222.27	CON__P35527	CON__P35527	580	619			yes	yes	3	8.6019E-55	97.634	2		1	2	2
GGSGGSHGGGSGFGGESGGSYGGGEEASGSGGGYGGGSGKSSHS	GGGSGGGYGGGSGSRGGSGGSHGGGSGFGG	SGGGYGGGSGKSSHS_______________	R	G	G	H	S	-	1	0	0	0	0	0	3	23	2	0	0	1	0	1	0	11	0	0	2	0	0	0	44	1	3620.43	CON__P35527	CON__P35527	580	623			yes	yes	4	1.207E-20	43.412			1
GGSGGSYGGGGSGGGYGGGSGSR	GGRGGSGGSYGRGSRGGSGGSYGGGGSGGG	GGGSGGGYGGGSGSRGGSGGSYGGGSGSGG	R	G	G	S	R	G	0	1	0	0	0	0	0	15	0	0	0	0	0	0	0	5	0	0	2	0	0	0	23	0	1790.72	CON__P35527	CON__P35527	491	513			yes	yes	2	1.9347E-08	90.725	2	1	1	2	2
GGSGGSYGR	DFESSGAGKIGLGGRGGSGGSYGRGSRGGS	IGLGGRGGSGGSYGRGSRGGSGGSYGGGGS	R	G	G	G	R	G	0	1	0	0	0	0	0	5	0	0	0	0	0	0	0	2	0	0	1	0	0	0	9	0	796.346	CON__P35527	CON__P35527	479	487			yes	yes	2	0.021393	69.105	1
GGSGGSYGRGSR	DFESSGAGKIGLGGRGGSGGSYGRGSRGGS	GGRGGSGGSYGRGSRGGSGGSYGGGGSGGG	R	G	G	S	R	G	0	2	0	0	0	0	0	6	0	0	0	0	0	0	0	3	0	0	1	0	0	0	12	1	1096.5	CON__P35527	CON__P35527	479	490			yes	yes	3	0.024351	32.624			1
GHGAGGASILTFWDAR	SDRALVFVDNHDNQRGHGAGGASILTFWDA	HGAGGASILTFWDARLYKMAVGFMLAHPYG	R	G	H	A	R	L	3	1	0	1	0	0	0	4	1	1	1	0	0	1	0	1	1	1	0	0	0	0	16	0	1614.79	P00687;CON__Q3MHH8	P00687	319	334	Amy1	Alpha-amylase 1	yes	no	3	0.0037247	43.592		1
GSGGGSSGGSIGGR	RGGSGGGGGGSSGGRGSGGGSSGGSIGGRG	RGSGGGSSGGSIGGRGSSSGGVKSSGGSSS	R	G	S	G	R	G	0	1	0	0	0	0	0	8	0	1	0	0	0	0	0	4	0	0	0	0	0	0	14	0	1091.5	CON__P04264	CON__P04264	603	616			yes	yes	2	0.00069696	92.611	1	1		2	1
GSLGGGFSSGGFSGGSFSR	GGGGGVSSLRISSSKGSLGGGFSSGGFSGG	GGFSSGGFSGGSFSRGSSGGGCFGGSSGGY	K	G	S	S	R	G	0	1	0	0	0	0	0	8	0	0	1	0	0	3	0	6	0	0	0	0	0	0	19	0	1706.76	CON__P13645	CON__P13645	41	59			yes	yes	2	5.6421E-06	94.728	2	2	2	2	2
GSRGGSGGSYGGGGSGGGYGGGSGSR	IGLGGRGGSGGSYGRGSRGGSGGSYGGGGS	GGGSGGGYGGGSGSRGGSGGSYGGGSGSGG	R	G	S	S	R	G	0	2	0	0	0	0	0	16	0	0	0	0	0	0	0	6	0	0	2	0	0	0	26	1	2090.88	CON__P35527	CON__P35527	488	513			yes	yes	3	2.9270999999999998E-21	65.248			1	1
GSSSGGGYSSGSSSYGSGGR	SNVASKAAFGGSGGRGSSSGGGYSSGSSSY	GGYSSGSSSYGSGGRQSGSRGGSGGGGSIS	R	G	S	G	R	Q	0	1	0	0	0	0	0	8	0	0	0	0	0	0	0	9	0	0	2	0	0	0	20	0	1739.7	CON__P35908v2;CON__P35908	CON__P35908v2	525	544			yes	no	2	0.00023944	56.482	1			2	1
GSYGSGGSSYGSGGGSYGSGGGGGGHGSYGSGSSSGGYR	GGGSYGSGGGGGGGRGSYGSGGSSYGSGGG	GHGSYGSGSSSGGYRGGSGGGGGGSSGGRG	R	G	S	Y	R	G	0	1	0	0	0	0	0	20	1	0	0	0	0	0	0	12	0	0	5	0	0	0	39	0	3311.3	CON__P04264	CON__P04264	550	588			yes	yes	3	0.013557	17.018			1		1
GTLLAVER	GFIFLASLRQMKKTRGTLLAVERKDNTGQI	RQMKKTRGTLLAVERKDNTGQIFSVVSNGK	R	G	T	E	R	K	1	1	0	0	0	0	1	1	0	0	2	0	0	0	0	0	1	0	0	1	0	0	8	0	857.497	P35441;Q80YQ1;CON__Q28194	P35441	102	109	Thbs1	Thrombospondin-1	no	no	2	6.348E-06	139.28	2	2	2	2	2
GTSQNDPNWVVR	ETDFRRFQMIPLDPKGTSQNDPNWVVRHQG	DPKGTSQNDPNWVVRHQGKELVQTVNCDPG	K	G	T	V	R	H	0	1	2	1	0	1	0	1	0	0	0	0	0	0	1	1	1	1	0	2	0	0	12	0	1371.65	P35441;Q80YQ1;CON__Q28194	P35441	969	980	Thbs1	Thrombospondin-1	no	no	2;3	9.419E-11	136.57	2	2	2	2	2
GVFVLNK	EGNQGARVGLVAVDKGVFVLNKKNKLTQSK	VGLVAVDKGVFVLNKKNKLTQSKIWDVVEK	K	G	V	N	K	K	0	0	1	0	0	0	0	1	0	0	1	1	0	1	0	0	0	0	0	2	0	0	7	0	775.459	P01027;H3BL60;CON__Q2UVX4	P01027	600	606	C3	Complement C3;Complement C3 beta chain;C3-beta-c;Complement C3 alpha chain;C3a anaphylatoxin;Acylation stimulating protein;Complement C3b alpha chain;Complement C3c alpha chain fragment 1;Complement C3dg fragment;Complement C3g fragment;Complement C3d fragment;Complement C3f fragment;Complement C3c alpha chain fragment 2	no	no	1;2	7.5332E-10	146.24	1	4	1	3	1
GVFVLNKK	EGNQGARVGLVAVDKGVFVLNKKNKLTQSK	GLVAVDKGVFVLNKKNKLTQSKIWDVVEKA	K	G	V	K	K	N	0	0	1	0	0	0	0	1	0	0	1	2	0	1	0	0	0	0	0	2	0	0	8	1	903.554	P01027;H3BL60;CON__Q2UVX4	P01027	600	607	C3	Complement C3;Complement C3 beta chain;C3-beta-c;Complement C3 alpha chain;C3a anaphylatoxin;Acylation stimulating protein;Complement C3b alpha chain;Complement C3c alpha chain fragment 1;Complement C3dg fragment;Complement C3g fragment;Complement C3d fragment;Complement C3f fragment;Complement C3c alpha chain fragment 2	no	no	2	0.0045145	137.44				1
HGNSHQGEPR	SNYELEGKIKEWYEKHGNSHQGEPRDYSKY	EWYEKHGNSHQGEPRDYSKYYKTIDDLKNQ	K	H	G	P	R	D	0	1	1	0	0	1	1	2	2	0	0	0	0	0	1	1	0	0	0	0	0	0	10	0	1117.5	CON__P13645	CON__P13645	185	194			yes	yes	3	0.00019425	94.363				1	1
HGSGLGHSSSHGQHGSGSGR	GRQGSGSGHSPSRGRHGSGLGHSSSHGQHG	GHSSSHGQHGSGSGRSSSRGPYESRSGHSS	R	H	G	G	R	S	0	1	0	0	0	1	0	7	4	0	1	0	0	0	0	6	0	0	0	0	0	0	20	0	1884.83	CON__Q86YZ3	CON__Q86YZ3	1248	1267			yes	no	5	7.8154E-07	94.42	1		1
HGSGSGHSSSHGQHGSGSGR	GRQGSGSGHSPSRGRHGSGSGHSSSHGQHG	GHSSSHGQHGSGSGRSSSRGPYESRSGHSS	R	H	G	G	R	S	0	1	0	0	0	1	0	7	4	0	0	0	0	0	0	7	0	0	0	0	0	0	20	0	1858.78	CON__Q86YZ3	CON__Q86YZ3	2188	2207			yes	yes	5	9.8282E-06	75.215	1
HGSGSGR	GQRGSGSGQSPSYGRHGSGSGRSSSSGRHG	GQSPSYGRHGSGSGRSSSSGRHGSGSGQSS	R	H	G	G	R	S	0	1	0	0	0	0	0	3	1	0	0	0	0	0	0	2	0	0	0	0	0	0	7	0	656.299	CON__Q86YZ3	CON__Q86YZ3	909	915			yes	no	2	0.0264	88.35	1				1
HGSSSGSSSHYGQHGSGSR	GQHGSRSGQSSRGERHGSSSGSSSHYGQHG	SGSSSHYGQHGSGSRQSSGHGRQGSGSGHS	R	H	G	S	R	Q	0	1	0	0	0	1	0	5	3	0	0	0	0	0	0	8	0	0	1	0	0	0	19	0	1857.77	CON__Q86YZ3	CON__Q86YZ3	1209	1227			yes	no	4	0.0062648	34.748			1
HGSSSGSSSR	GQHGSRSGQSSRGERHGSSSGSSSRYGQHG	SRGERHGSSSGSSSRYGQHGSGSRQSSGHG	R	H	G	S	R	Y	0	1	0	0	0	0	0	2	1	0	0	0	0	0	0	6	0	0	0	0	0	0	10	0	947.406	CON__Q86YZ3	CON__Q86YZ3	2149	2158			yes	yes	2	0.018933	61.962			1
HGVQELEIELQSQLSK	GQEVQSSAKEVTQLRHGVQELEIELQSQLS	GVQELEIELQSQLSKKAALEKSLEDTKNRY	R	H	G	S	K	K	0	0	0	0	0	3	3	1	1	1	3	1	0	0	0	2	0	0	0	1	0	0	16	0	1836.96	CON__P35527	CON__P35527	375	390			yes	yes	3	0.0040027	42.338	1
HMWPGDIK	LIDIGVAGFRLDASKHMWPGDIKAILDKLH	FRLDASKHMWPGDIKAILDKLHNLNTKWFS	K	H	M	I	K	A	0	0	0	1	0	0	0	1	1	1	0	1	1	0	1	0	0	1	0	0	0	0	8	0	982.469	P00687;E9PV85;D3YYQ5;CON__Q3MHH8;P00688	P00687	216	223	Amy1;Amy2a1;Amy2	Alpha-amylase 1;Alpha-amylase;Pancreatic alpha-amylase	yes	no	2	0.0031327	127.12		2
IKFEMEQNLR	LLDIDNTRMTLDDFRIKFEMEQNLRQGVDA	LDDFRIKFEMEQNLRQGVDADINGLRQVLD	R	I	K	L	R	Q	0	1	1	0	0	1	2	0	0	1	1	1	1	1	0	0	0	0	0	0	0	0	10	1	1306.67	CON__P35527	CON__P35527	241	250			yes	yes	3	0.043227	42.001	1
IMADSGPIYDK	PKTGYIRVVMYEGKKIMADSGPIYDKTYAG	EGKKIMADSGPIYDKTYAGGRLGLFVFSQE	K	I	M	D	K	T	1	0	0	2	0	0	0	1	0	2	0	1	1	0	1	1	0	0	1	0	0	0	11	0	1208.57	P35441;Q80YQ1;CON__Q28194	P35441	1131	1141	Thbs1	Thrombospondin-1	no	no	2	0.00068241	109.66	2	2	2	2	2
IMADSGPIYDKTYAGGR	PKTGYIRVVMYEGKKIMADSGPIYDKTYAG	ADSGPIYDKTYAGGRLGLFVFSQEMVFFSD	K	I	M	G	R	L	2	1	0	2	0	0	0	3	0	2	0	1	1	0	1	1	1	0	2	0	0	0	17	1	1813.87	P35441;Q80YQ1;CON__Q28194	P35441	1131	1147	Thbs1	Thrombospondin-1	no	no	3	1.6366E-05	94.544	2		2	2	2
ISSSKGSLGGGFSSGGFSGGSFSR	GGGGCGGGGGVSSLRISSSKGSLGGGFSSG	GGFSSGGFSGGSFSRGSSGGGCFGGSSGGY	R	I	S	S	R	G	0	1	0	0	0	0	0	8	0	1	1	1	0	3	0	9	0	0	0	0	0	0	24	1	2209.04	CON__P13645	CON__P13645	36	59			yes	yes	3	0.039639	11.943	1
IWDVVEK	GVFVLNKKNKLTQSKIWDVVEKADIGCTPG	KNKLTQSKIWDVVEKADIGCTPGSGKNYAG	K	I	W	E	K	A	0	0	0	1	0	0	1	0	0	1	0	1	0	0	0	0	0	1	0	2	0	0	7	0	887.475	P01027;H3BL60;CON__Q2UVX4	P01027	615	621	C3	Complement C3;Complement C3 beta chain;C3-beta-c;Complement C3 alpha chain;C3a anaphylatoxin;Acylation stimulating protein;Complement C3b alpha chain;Complement C3c alpha chain fragment 1;Complement C3dg fragment;Complement C3g fragment;Complement C3d fragment;Complement C3f fragment;Complement C3c alpha chain fragment 2	no	no	2	0.0098204	114.72	1	1	2	2	2
KFISHIK	VIKSGSDEVQAGQQRKFISHIKCRNALKLQ	EVQAGQQRKFISHIKCRNALKLQKGKKYLM	R	K	F	I	K	C	0	0	0	0	0	0	0	0	1	2	0	2	0	1	0	1	0	0	0	0	0	0	7	1	871.528	P01027;CON__Q2UVX4	P01027	1583	1589	C3	Complement C3;Complement C3 beta chain;C3-beta-c;Complement C3 alpha chain;C3a anaphylatoxin;Acylation stimulating protein;Complement C3b alpha chain;Complement C3c alpha chain fragment 1;Complement C3dg fragment;Complement C3g fragment;Complement C3d fragment;Complement C3f fragment;Complement C3c alpha chain fragment 2	no	no	2	0.018855	110.14		1		1
KIMADSGPIYDK	RPKTGYIRVVMYEGKKIMADSGPIYDKTYA	EGKKIMADSGPIYDKTYAGGRLGLFVFSQE	K	K	I	D	K	T	1	0	0	2	0	0	0	1	0	2	0	2	1	0	1	1	0	0	1	0	0	0	12	1	1336.67	P35441;Q80YQ1;CON__Q28194	P35441	1130	1141	Thbs1	Thrombospondin-1	no	no	2;3	3.3624E-08	126.66	2	2	1	3	3
LALDLEIATYR	LARLLRDYQELMNTKLALDLEIATYRTLLE	MNTKLALDLEIATYRTLLEGEESRMSGECA	K	L	A	Y	R	T	2	1	0	1	0	0	1	0	0	1	3	0	0	0	0	0	1	0	1	0	0	0	11	0	1276.7	CON__P04264	CON__P04264	473	483			yes	yes	2	0.0027404	98.249	2	1	1
LALDVEIATYR	LARLLRDYQELMNVKLALDVEIATYRKLLE	MNVKLALDVEIATYRKLLEGEECRMSGDLS	K	L	A	Y	R	K	2	1	0	1	0	0	1	0	0	1	2	0	0	0	0	0	1	0	1	1	0	0	11	0	1262.69	CON__P35908v2;CON__P35908	CON__P35908v2	471	481			no	no	2	0.016224	56.432					1
LASYLDKVQALEEANNDLENK	LTANEKSTMQELNSRLASYLDKVQALEEAN	KVQALEEANNDLENKIQDWYDKKGPAAIQK	R	L	A	N	K	I	3	0	3	2	0	1	3	0	0	0	4	2	0	0	0	1	0	0	1	1	0	0	21	1	2376.18	CON__P35527	CON__P35527	164	184			yes	yes	3	0.0025075	40.381	1			1	1
LGEYGFQNALIVR	EPQNLIKQNCDQFEKLGEYGFQNALIVRYT	EKLGEYGFQNALIVRYTRKVPQVSTPTLVE	K	L	G	V	R	Y	1	1	1	0	0	1	1	2	0	1	2	0	0	1	0	0	0	0	1	1	0	0	13	0	1478.79	CON__P02769	CON__P02769	421	433			yes	yes	2;3	1.0685E-32	157.96	6	14	8	4	6
LPYSVVR	PYEIRVMQDFFIDLRLPYSVVRNEQVEIRA	QDFFIDLRLPYSVVRNEQVEIRAVLFNYRE	R	L	P	V	R	N	0	1	0	0	0	0	0	0	0	0	1	0	0	0	1	1	0	0	1	2	0	0	7	0	832.481	P01027;CON__Q2UVX4	P01027	835	841	C3	Complement C3;Complement C3 beta chain;C3-beta-c;Complement C3 alpha chain;C3a anaphylatoxin;Acylation stimulating protein;Complement C3b alpha chain;Complement C3c alpha chain fragment 1;Complement C3dg fragment;Complement C3g fragment;Complement C3d fragment;Complement C3f fragment;Complement C3c alpha chain fragment 2	no	no	2	0.00022334	153.67	1	2	2	2
LPYSVVRNEQVEIR	PYEIRVMQDFFIDLRLPYSVVRNEQVEIRA	RLPYSVVRNEQVEIRAVLFNYREQEELKVR	R	L	P	I	R	A	0	2	1	0	0	1	2	0	0	1	1	0	0	0	1	1	0	0	1	3	0	0	14	1	1700.92	P01027;CON__Q2UVX4	P01027	835	848	C3	Complement C3;Complement C3 beta chain;C3-beta-c;Complement C3 alpha chain;C3a anaphylatoxin;Acylation stimulating protein;Complement C3b alpha chain;Complement C3c alpha chain fragment 1;Complement C3dg fragment;Complement C3g fragment;Complement C3d fragment;Complement C3f fragment;Complement C3c alpha chain fragment 2	no	no	3	0.0098316	45.115	1
LRVDPVNFK	LPGALSALSDLHAHKLRVDPVNFKLLSHCL	DLHAHKLRVDPVNFKLLSHCLLVTLASHHP	K	L	R	F	K	L	0	1	1	1	0	0	0	0	0	0	1	1	0	1	1	0	0	0	0	2	0	0	9	1	1086.62	Q91VB8;P01942;CON__P01966	Q91VB8	92	100	haemaglobin alpha 2;Hba	Hemoglobin subunit alpha	no	no	2;3	0.0001175	137.9	2	2	3	4	2
LVPNPDQK	DDDNDGIPDDRDNCRLVPNPDQKDSDGDGR	DDRDNCRLVPNPDQKDSDGDGRGDACKDDF	R	L	V	Q	K	D	0	0	1	1	0	1	0	0	0	0	1	1	0	0	2	0	0	0	0	1	0	0	8	0	909.492	P35441;Q80YQ1;CON__Q28194	P35441	912	919	Thbs1	Thrombospondin-1	no	no	2	0.0078642	117.93	2	2	3	1	2
NEQVEIR	QDFFIDLRLPYSVVRNEQVEIRAVLFNYRE	RLPYSVVRNEQVEIRAVLFNYREQEELKVR	R	N	E	I	R	A	0	1	1	0	0	1	2	0	0	1	0	0	0	0	0	0	0	0	0	1	0	0	7	0	886.451	P01027;CON__Q2UVX4	P01027	842	848	C3	Complement C3;Complement C3 beta chain;C3-beta-c;Complement C3 alpha chain;C3a anaphylatoxin;Acylation stimulating protein;Complement C3b alpha chain;Complement C3c alpha chain fragment 1;Complement C3dg fragment;Complement C3g fragment;Complement C3d fragment;Complement C3f fragment;Complement C3c alpha chain fragment 2	no	no	2	9.7749E-08	160.03	1	1	1	2	1
NKYEDEINKR	DSELKNMQDMVEDYRNKYEDEINKRTNAEN	VEDYRNKYEDEINKRTNAENEFVTIKKDVD	R	N	K	K	R	T	0	1	2	1	0	0	2	0	0	1	0	2	0	0	0	0	0	0	1	0	0	0	10	2	1307.65	CON__P04264	CON__P04264	268	277			no	no	3	0.0030689	95.775	2			2
NLDLDSIIAEVK	SVTDTNVILSMDNSRNLDLDSIIAEVKAQY	NSRNLDLDSIIAEVKAQYEEIAQRSKEEAE	R	N	L	V	K	A	1	0	1	2	0	0	1	0	0	2	2	1	0	0	0	1	0	0	0	1	0	0	12	0	1328.72	CON__P35908v2;CON__P35908	CON__P35908v2	342	353			no	no	2	0.001942	76.465	1	1		1	2
NMQDMVEDYR	DQLKSDQSRLDSELKNMQDMVEDYRNKYED	DSELKNMQDMVEDYRNKYEDEINKRTNAEN	K	N	M	Y	R	N	0	1	1	2	0	1	1	0	0	0	0	0	2	0	0	0	0	0	1	1	0	0	10	0	1299.52	CON__P04264	CON__P04264	258	267			yes	yes	2	0.026924	65.224	1				2
NQILNLTTDNANILLQIDNAR	PRDYSKYYKTIDDLKNQILNLTTDNANILL	TTDNANILLQIDNARLAADDFRLKYENEVA	K	N	Q	A	R	L	2	1	5	2	0	2	0	0	0	3	4	0	0	0	0	0	2	0	0	0	0	0	21	0	2366.26	CON__P13645	CON__P13645	208	228			yes	yes	3	0.0066192	29.136					1
NVQALEIELQSQLALK	EQISSYKSEITELRRNVQALEIELQSQLAL	VQALEIELQSQLALKQSLEASLAETEGRYC	R	N	V	L	K	Q	2	0	1	0	0	3	2	0	0	1	4	1	0	0	0	1	0	0	0	1	0	0	16	0	1796	CON__P13645	CON__P13645	371	386			yes	yes	3	0.012996	26.435				1
NVSTGDVNVEMNAAPGVDLTQLLNNMR	AYLKKNHEEEMKDLRNVSTGDVNVEMNAAP	AAPGVDLTQLLNNMRSQYEQLAEQNRKDAE	R	N	V	M	R	S	2	1	5	2	0	1	1	2	0	0	3	0	2	0	1	1	2	0	0	4	0	0	27	0	2871.39	CON__P13645	CON__P13645	296	322			yes	yes	3	7.4403E-53	125.99		1		2	3
NYSPYYNTIDDLKDQIVDLTVGNNK	IQDWYDKKGPAAIQKNYSPYYNTIDDLKDQ	DLKDQIVDLTVGNNKTLLDIDNTRMTLDDF	K	N	Y	N	K	T	0	0	4	4	0	1	0	1	0	2	2	2	0	0	1	1	2	0	3	2	0	0	25	1	2901.4	CON__P35527	CON__P35527	200	224			yes	yes	3	3.7434E-05	43.888	2		1
QEPERNECFLQHK	NLRENYGELADCCTKQEPERNECFLQHKDD	TKQEPERNECFLQHKDDNPSLPPFERPEAE	K	Q	E	H	K	D	0	1	1	0	1	2	3	0	1	0	1	1	0	1	1	0	0	0	0	0	0	0	13	1	1656.77	P07724	P07724	118	130	Alb	Serum albumin	no	no	3;4	0.00076665	71.176	1				1
QISNLQQSISDAEQR	RVIQRLRSEIDNVKKQISNLQQSISDAEQR	QISNLQQSISDAEQRGENALKDAKNKLNDL	K	Q	I	Q	R	G	1	1	1	1	0	4	1	0	0	2	1	0	0	0	0	3	0	0	0	0	0	0	15	0	1715.84	CON__P04264	CON__P04264	418	432			yes	yes	3	0.021777	21.093
QLMEVFK	AFAMTKLGACNDTLKQLMEVFKFDTISEKT	GACNDTLKQLMEVFKFDTISEKTSDQIHFF	K	Q	L	F	K	F	0	0	0	0	0	1	1	0	0	0	1	1	1	1	0	0	0	0	0	1	0	0	7	0	893.468	P32261;A0A0A6YWH7;A0A0A6YXS8;A0A0A6YX49	P32261	134	140	Serpinc1	Antithrombin-III	no	no	2	0.015451	111.65	1				2
QLMEVFKFDTISEK	AFAMTKLGACNDTLKQLMEVFKFDTISEKT	KQLMEVFKFDTISEKTSDQIHFFFAKLNCR	K	Q	L	E	K	T	0	0	0	1	0	1	2	0	0	1	1	2	1	2	0	1	1	0	0	1	0	0	14	1	1713.86	P32261;A0A0A6YWH7;A0A0A6YXS8;A0A0A6YX49	P32261	134	147	Serpinc1	Antithrombin-III	no	no	3	0.00073312	75.669	1	2	1	2
QSPSYGR	SGQSPGHGQRGSGSGQSPSYGRHGSGSGRS	GQRGSGSGQSPSYGRHGSGSGRSSSSGRHG	G	Q	S	G	R	H	0	1	0	0	0	1	0	1	0	0	0	0	0	0	1	2	0	0	1	0	0	0	7	0	793.372	CON__Q86YZ3	CON__Q86YZ3	902	908			yes	no	2	0.013299	100.74			1
QSVEADINGLRR	ADDFRLKYENEVALRQSVEADINGLRRVLD	ALRQSVEADINGLRRVLDELTLTKADLEMQ	R	Q	S	R	R	V	1	2	1	1	0	1	1	1	0	1	1	0	0	0	0	1	0	0	0	1	0	0	12	1	1356.71	CON__P13645;P02535;CON__P02535-1;A2A513;CON__ENSEMBL:ENSP00000377550;CON__P13646-1;CON__P08730-1;P08730	CON__P13645	246	257	Krt10;Krt13	Keratin, type I cytoskeletal 10;Keratin, type I cytoskeletal 13	yes	no	3	0.0051795	52.247			2		1
QVTQSYWDTNPTR	FGYQSSSRFYVVMWKQVTQSYWDTNPTRAQ	WKQVTQSYWDTNPTRAQGYSGLSVKVVNST	K	Q	V	T	R	A	0	1	1	1	0	2	0	0	0	0	0	0	0	0	1	1	3	1	1	1	0	0	13	0	1594.74	P35441;Q80YQ1;CON__Q28194	P35441	1042	1054	Thbs1	Thrombospondin-1	no	no	2;3	0	253.71	3	4	2	2	3
RFQMIPLDPK	DICPENFDISETDFRRFQMIPLDPKGTSQN	ETDFRRFQMIPLDPKGTSQNDPNWVVRHQG	R	R	F	P	K	G	0	1	0	1	0	1	0	0	0	1	1	1	1	1	2	0	0	0	0	0	0	0	10	1	1243.67	P35441;CON__Q28194	P35441	959	968	Thbs1	Thrombospondin-1	no	no	2;3	0.022022	81.548		1			1
RPCFSALTPDETYVPK	SEKVTKCCTESLVNRRPCFSALTPDETYVP	PCFSALTPDETYVPKAFDEKLFTFHADICT	R	R	P	P	K	A	1	1	0	1	1	0	1	0	0	0	1	1	0	1	3	1	2	0	1	1	0	0	16	1	1822.89	CON__P02769	CON__P02769	508	523			yes	yes	3	0.012628	36.638	1	1	1
RVWELSK	EEDGSEQKVPEATNRRVWELSKANSRFATN	KVPEATNRRVWELSKANSRFATNFYQHLAD	R	R	V	S	K	A	0	1	0	0	0	0	1	0	0	0	1	1	0	0	0	1	0	1	0	1	0	0	7	1	916.513	P32261;A0A0A6YWH7;A0A0A6YX70	P32261	80	86	Serpinc1	Antithrombin-III	no	no	2	0.014246	125.5	2	2
SCDSLNNR	SCSATCGNGIQQRGRSCDSLNNRCEGSSVQ	GIQQRGRSCDSLNNRCEGSSVQTRTCHIQE	R	S	C	N	R	C	0	1	2	1	1	0	0	0	0	0	1	0	0	0	0	2	0	0	0	0	0	0	8	0	907.382	P35441;Q80YQ1;CON__Q28194	P35441	405	412	Thbs1	Thrombospondin-1	no	no	2	4.0986E-53	186.67	1		1		4
SGGGGGGGLGSGGSIR	______________________________	GGGGGGGLGSGGSIRSSYSRFSSSGGRGGG	R	S	G	I	R	S	0	1	0	0	0	0	0	10	0	1	1	0	0	0	0	3	0	0	0	0	0	0	16	0	1231.59	CON__P35527	CON__P35527	14	29			yes	yes	2	0.0054266	51.359			1
SGQSSRGER	SGSGHSSGYGQHGSRSGQSSRGERHRSSSG	GQHGSRSGQSSRGERHRSSSGSSSSYGQHG	R	S	G	E	R	H	0	2	0	0	0	1	1	2	0	0	0	0	0	0	0	3	0	0	0	0	0	0	9	1	962.453	CON__Q86YZ3	CON__Q86YZ3	264	272			yes	no	3	0.029856	46.819			1
SISISVAGGGGGFGAAGGFGGR	GGFGSRSLVGLGGTKSISISVAGGGGGFGA	GGGGGFGAAGGFGGRGGGFGGGSSFGGGSG	K	S	I	G	R	G	3	1	0	0	0	0	0	10	0	2	0	0	0	2	0	3	0	0	0	1	0	0	22	0	1837.91	CON__P35908v2;CON__P35908	CON__P35908v2	71	92			yes	no	2	5.539E-08	117.07				1
SISISVAR	GGFGSRSLVNLGGSKSISISVARGGGRGSG	VNLGGSKSISISVARGGGRGSGFGGGYGGG	K	S	I	A	R	G	1	1	0	0	0	0	0	0	0	2	0	0	0	0	0	3	0	0	0	1	0	0	8	0	831.481	CON__P04264	CON__P04264	75	82			yes	yes	2	0.019456	89.55			1
SITLFVQEDR	VVSVEEALLATGQWKSITLFVQEDRAQLYI	TGQWKSITLFVQEDRAQLYIDCDKMESAEL	K	S	I	D	R	A	0	1	0	1	0	1	1	0	0	1	1	0	0	1	0	1	1	0	0	1	0	0	10	0	1206.62	P35441;Q80YQ1;CON__Q28194	P35441	155	164	Thbs1	Thrombospondin-1	no	no	2	2.1507E-38	176.79	2	2	4	2	5
SLDLDSIIAEVK	QISETNVILSMDNNRSLDLDSIIAEVKAQN	NNRSLDLDSIIAEVKAQNEDIAQKSKAEAE	R	S	L	V	K	A	1	0	0	2	0	0	1	0	0	2	2	1	0	0	0	2	0	0	0	1	0	0	12	0	1301.71	CON__P04264;A0A2R8VHP3	CON__P04264	344	355			no	no	2	0.0001437	93.667	2		2	2	2
SLHTLFGDK	AKTCVADESAANCDKSLHTLFGDKLCAIPN	AANCDKSLHTLFGDKLCAIPNLRENYGELA	K	S	L	D	K	L	0	0	0	1	0	0	0	1	1	0	2	1	0	1	0	1	1	0	0	0	0	0	9	0	1016.53	P07724	P07724	89	97	Alb	Serum albumin	no	no	2;3	1.6387E-44	182.69	5	5	5	5	5
SLNNQFASFIDK	PEIQKVKSREREQIKSLNNQFASFIDKVRF	QIKSLNNQFASFIDKVRFLEQQNQVLQTKW	K	S	L	D	K	V	1	0	2	1	0	1	0	0	0	1	1	1	0	2	0	2	0	0	0	0	0	0	12	0	1382.68	CON__P04264	CON__P04264	186	197			no	no	3	0.015903	30.205					1
SLNNQFASFIDKVR	PEIQKVKSREREQIKSLNNQFASFIDKVRF	KSLNNQFASFIDKVRFLEQQNQVLQTKWEL	K	S	L	V	R	F	1	1	2	1	0	1	0	0	0	1	1	1	0	2	0	2	0	0	0	1	0	0	14	1	1637.85	CON__P04264	CON__P04264	186	199			no	no	3	0.00044528	86.467	2	2	1
SLVNLGGSK	GGGGSFGAGGGFGSRSLVNLGGSKSISISV	GGFGSRSLVNLGGSKSISISVARGGGRGSG	R	S	L	S	K	S	0	0	1	0	0	0	0	2	0	0	2	1	0	0	0	2	0	0	0	1	0	0	9	0	873.492	CON__P04264	CON__P04264	66	74			yes	yes	2	0.0087823	91.069	1		1
SLVNLGGSKSISISVAR	GGGGSFGAGGGFGSRSLVNLGGSKSISISV	VNLGGSKSISISVARGGGRGSGFGGGYGGG	R	S	L	A	R	G	1	1	1	0	0	0	0	2	0	2	2	1	0	0	0	5	0	0	0	2	0	0	17	1	1686.96	CON__P04264	CON__P04264	66	82			yes	yes	3	0.00042861	89.261	1		1
SQYEQLAEQNRK	AAPGVDLTQLLNNMRSQYEQLAEQNRKDAE	NMRSQYEQLAEQNRKDAEAWFNEKSKELTT	R	S	Q	R	K	D	1	1	1	0	0	3	2	0	0	0	1	1	0	0	0	1	0	0	1	0	0	0	12	1	1492.73	CON__P13645	CON__P13645	323	334			yes	yes	3	0.00010189	73.951	2	1	1	2	1
SSFFVNGLTLGGQK	SITPAEVGVLVGKDRSSFFVNGLTLGGQKC	RSSFFVNGLTLGGQKCSVIRDSLLQDGEFT	R	S	S	Q	K	C	0	0	1	0	0	1	0	3	0	0	2	1	0	2	0	2	1	0	0	1	0	0	14	0	1453.76	Q5SX49;P62962;CON__P02584	Q5SX49	57	70	Pfn1	Profilin;Profilin-1	yes	no	2;3	6.4084E-06	146.11	1	2	1	1	3
SSSRGPYESR	GHSSSHGQHGSGSGRSSSRGPYESRSGHSS	SGSGRSSSRGPYESRSGHSSVFGQHESGSG	R	S	S	S	R	S	0	2	0	0	0	0	1	1	0	0	0	0	0	0	1	4	0	0	1	0	0	0	10	1	1124.52	CON__Q86YZ3	CON__Q86YZ3	1268	1277			yes	no	3	0.004875	67.385			1
SSVAVPYVIVPLK	TAKNRYFQTIKIPPKSSVAVPYVIVPLKIG	PKSSVAVPYVIVPLKIGQQEVEVKAAVFNH	K	S	S	L	K	I	1	0	0	0	0	0	0	0	0	1	1	1	0	0	2	2	0	0	1	4	0	0	13	0	1370.82	P01027;CON__Q2UVX4	P01027	892	904	C3	Complement C3;Complement C3 beta chain;C3-beta-c;Complement C3 alpha chain;C3a anaphylatoxin;Acylation stimulating protein;Complement C3b alpha chain;Complement C3c alpha chain fragment 1;Complement C3dg fragment;Complement C3g fragment;Complement C3d fragment;Complement C3f fragment;Complement C3c alpha chain fragment 2	no	no	2	1.1561E-06	123.35	2	2	2	2
STGGAPTFNVTVTMTAK	SLLQDGEFTMDLRTKSTGGAPTFNVTVTMT	GGAPTFNVTVTMTAKSEFD___________	K	S	T	A	K	S	2	0	1	0	0	0	0	2	0	0	0	1	1	1	1	1	5	0	0	2	0	0	17	0	1681.83	Q5SX49;P62962	Q5SX49	92	108	Pfn1	Profilin;Profilin-1	yes	no	2	0.021545	38.008					1
TDYIGHK	TLDNNVVNGSSPAIRTDYIGHKTKDLQAIC	NGSSPAIRTDYIGHKTKDLQAICGISCDEL	R	T	D	H	K	T	0	0	0	1	0	0	0	1	1	1	0	1	0	0	0	0	1	0	1	0	0	0	7	0	832.408	CON__Q28194	CON__Q28194	256	262			yes	yes	2	0.038837	79.939			1
TFVSITPAEVGVLVGK	GYKDSPSVWAAVPGKTFVSITPAEVGVLVG	FVSITPAEVGVLVGKDRSSFFVNGLTLGGQ	K	T	F	G	K	D	1	0	0	0	0	0	1	2	0	1	1	1	0	1	1	1	2	0	0	4	0	0	16	0	1615.92	Q5SX49;P62962	Q5SX49	39	54	Pfn1	Profilin;Profilin-1	yes	no	2;3	0.00011065	101.93		2	2	1	3
THNLEPYFESFINNLR	QTKWELLQQVDTSTRTHNLEPYFESFINNL	HNLEPYFESFINNLRRRVDQLKSDQSRLDS	R	T	H	L	R	R	0	1	3	0	0	0	2	0	1	1	2	0	0	2	1	1	1	0	1	0	0	0	16	0	1992.97	CON__P04264	CON__P04264	224	239			yes	yes	3	1.9564E-08	69.485	2
TIVTTLQDSIR	CDELSSMVLELKGLRTIVTTLQDSIRKVTE	KGLRTIVTTLQDSIRKVTEENRELVSELKR	R	T	I	I	R	K	0	1	0	1	0	1	0	0	0	2	1	0	0	0	0	1	3	0	0	1	0	0	11	0	1245.69	P35441;Q80YQ1;CON__Q28194	P35441	289	299	Thbs1	Thrombospondin-1	no	no	2	3.1872E-13	168.8	4	4	4	3	4
TIYTPGSTVLYR	MVSFQSGYLFIQTDKTIYTPGSTVLYRIFT	TDKTIYTPGSTVLYRIFTVDNNLLPVGKTV	K	T	I	Y	R	I	0	1	0	0	0	0	0	1	0	1	1	0	0	0	1	1	3	0	2	1	0	0	12	0	1369.72	P01027;CON__Q2UVX4	P01027	138	149	C3	Complement C3;Complement C3 beta chain;C3-beta-c;Complement C3 alpha chain;C3a anaphylatoxin;Acylation stimulating protein;Complement C3b alpha chain;Complement C3c alpha chain fragment 1;Complement C3dg fragment;Complement C3g fragment;Complement C3d fragment;Complement C3f fragment;Complement C3c alpha chain fragment 2	no	no	2	1.5926E-18	168.83	2	2	2	2	2
TLLDIDNTR	DLKDQIVDLTVGNNKTLLDIDNTRMTLDDF	TVGNNKTLLDIDNTRMTLDDFRIKFEMEQN	K	T	L	T	R	M	0	1	1	2	0	0	0	0	0	1	2	0	0	0	0	0	2	0	0	0	0	0	9	0	1059.56	CON__P35527	CON__P35527	225	233			yes	yes	2	0.03514	71.501
TLLEGEESR	MNTKLALDLEIATYRTLLEGEESRMSGECA	EIATYRTLLEGEESRMSGECAPNVSVSVST	R	T	L	S	R	M	0	1	0	0	0	0	3	1	0	0	2	0	0	0	0	1	1	0	0	0	0	0	9	0	1032.51	CON__P04264	CON__P04264	484	492			no	no	2	0.018513	79.906	2	1
TLWHDPR	RNALWHTGNTPGQVRTLWHDPRHIGWKDFT	GNTPGQVRTLWHDPRHIGWKDFTAYRWRLS	R	T	L	P	R	H	0	1	0	1	0	0	0	0	1	0	1	0	0	0	1	0	1	1	0	0	0	0	7	0	923.461	P35441;Q80YQ1;CON__Q28194	P35441	1092	1098	Thbs1	Thrombospondin-1	no	no	2;3	0.0099535	113.7	1			1	2
TNAENEFVTIKK	VEDYRNKYEDEINKRTNAENEFVTIKKDVD	NKRTNAENEFVTIKKDVDGAYMTKVDLQAK	R	T	N	K	K	D	1	0	2	0	0	0	2	0	0	1	0	2	0	1	0	0	2	0	0	1	0	0	12	1	1392.72	CON__P04264;P04104	CON__P04264	278	289	Krt1	Keratin, type II cytoskeletal 1	yes	no	3	0.0015873	66.538	1		2
TSDQIHFFFAK	KQLMEVFKFDTISEKTSDQIHFFFAKLNCR	ISEKTSDQIHFFFAKLNCRLYRKANKSSDL	K	T	S	A	K	L	1	0	0	1	0	1	0	0	1	1	0	1	0	3	0	1	1	0	0	0	0	0	11	0	1339.66	P32261;A0A0A6YWH7;A0A0A6YXS8;A0A0A6YX49	P32261	148	158	Serpinc1	Antithrombin-III	no	no	2;3	0.00049005	103.26			1	2	2
TTDVTQTFGIEK	RDSITVVLGQHFFNRTTDVTQTFGIEKYVP	FNRTTDVTQTFGIEKYVPYTLYSVFNPNNH	R	T	T	E	K	Y	0	0	0	1	0	1	1	1	0	1	0	1	0	1	0	0	4	0	0	1	0	0	12	0	1338.67	Q9R098;A0A0J9YUY6;CON__ENSEMBL:ENSBTAP00000023055	Q9R098	468	479	Hgfac	Hepatocyte growth factor activator;Hepatocyte growth factor activator short chain;Hepatocyte growth factor activator long chain	yes	no	2	0.002216	88.681	2	2	2	2
VADYMNHLIDIGVAGFR	GLLDLALEKDYVRTKVADYMNHLIDIGVAG	DYMNHLIDIGVAGFRLDASKHMWPGDIKAI	K	V	A	F	R	L	2	1	1	2	0	0	0	2	1	2	1	0	1	1	0	0	0	0	1	2	0	0	17	0	1889.95	P00687;E9PV85;D3YYQ5;P00688	P00687	194	210	Amy1;Amy2a1;Amy2	Alpha-amylase 1;Alpha-amylase;Pancreatic alpha-amylase	yes	no	3	0.0095448	34.909				1
VDPVNFK	GALSALSDLHAHKLRVDPVNFKLLSHCLLV	DLHAHKLRVDPVNFKLLSHCLLVTLASHHP	R	V	D	F	K	L	0	0	1	1	0	0	0	0	0	0	0	1	0	1	1	0	0	0	0	2	0	0	7	0	817.433	Q91VB8;P01942;A7M7S6;P06467;CON__P01966	Q91VB8	94	100	haemaglobin alpha 2;Hba;Hba-x;Hbz	Hemoglobin subunit alpha;Hemoglobin subunit zeta	no	no	1;2	0.011701	117.93			2	2	1
VGGHAAEYGAEALER	LSAADKGNVKAAWGKVGGHAAEYGAEALER	VGGHAAEYGAEALERMFLSFPTTKTYFPHF	K	V	G	E	R	M	4	1	0	0	0	0	3	3	1	0	1	0	0	0	0	0	0	0	1	1	0	0	15	0	1528.73	CON__P01966	CON__P01966	18	32			yes	yes	3	6.0364E-39	113.53	2	1	1	2	2
VGLVAVDK	GQQTTLRIEGNQGARVGLVAVDKGVFVLNK	EGNQGARVGLVAVDKGVFVLNKKNKLTQSK	R	V	G	D	K	G	1	0	0	1	0	0	0	1	0	0	1	1	0	0	0	0	0	0	0	3	0	0	8	0	799.48	P01027;H3BL60;CON__Q2UVX4	P01027	592	599	C3	Complement C3;Complement C3 beta chain;C3-beta-c;Complement C3 alpha chain;C3a anaphylatoxin;Acylation stimulating protein;Complement C3b alpha chain;Complement C3c alpha chain fragment 1;Complement C3dg fragment;Complement C3g fragment;Complement C3d fragment;Complement C3f fragment;Complement C3c alpha chain fragment 2	no	no	2	0.0043524	111.82	2	2	2	2	2
VGLVAVDKGVFVLNK	GQQTTLRIEGNQGARVGLVAVDKGVFVLNK	VGLVAVDKGVFVLNKKNKLTQSKIWDVVEK	R	V	G	N	K	K	1	0	1	1	0	0	0	2	0	0	2	2	0	1	0	0	0	0	0	5	0	0	15	1	1556.93	P01027;H3BL60;CON__Q2UVX4	P01027	592	606	C3	Complement C3;Complement C3 beta chain;C3-beta-c;Complement C3 alpha chain;C3a anaphylatoxin;Acylation stimulating protein;Complement C3b alpha chain;Complement C3c alpha chain fragment 1;Complement C3dg fragment;Complement C3g fragment;Complement C3d fragment;Complement C3f fragment;Complement C3c alpha chain fragment 2	no	no	3	0.00010406	102.73	2	2	2	2	2
VGLVAVDKGVFVLNKK	GQQTTLRIEGNQGARVGLVAVDKGVFVLNK	GLVAVDKGVFVLNKKNKLTQSKIWDVVEKA	R	V	G	K	K	N	1	0	1	1	0	0	0	2	0	0	2	3	0	1	0	0	0	0	0	5	0	0	16	2	1685.02	P01027;H3BL60;CON__Q2UVX4	P01027	592	607	C3	Complement C3;Complement C3 beta chain;C3-beta-c;Complement C3 alpha chain;C3a anaphylatoxin;Acylation stimulating protein;Complement C3b alpha chain;Complement C3c alpha chain fragment 1;Complement C3dg fragment;Complement C3g fragment;Complement C3d fragment;Complement C3f fragment;Complement C3c alpha chain fragment 2	no	no	3	5.002400000000001E-25	136.83	2	1	2	1	1
VTMQNLNDR	GGFGGDGGLLSGNEKVTMQNLNDRLASYLD	LSGNEKVTMQNLNDRLASYLDKVRALEESN	K	V	T	D	R	L	0	1	2	1	0	1	0	0	0	0	1	0	1	0	0	0	1	0	0	1	0	0	9	0	1089.52	CON__P13645;P02535;CON__P02535-1;A2A513;CON__Q7Z3Y7;CON__Q7Z3Z0;CON__Q148H6;CON__Q7Z3Y8;CON__Q7Z3Y9;CON__Q3ZAW8;CON__P08779;CON__P02533;CON__Q9Z2K1;B1AQ77;Q9Z2K1;Q61414;Q61781;Q9Z320;Q8VCW2;CON__A2A4G1	CON__P13645	148	156	Krt10;Krt15;Krt16;Krt14;Krt27;Krt25	Keratin, type I cytoskeletal 10;Keratin, type I cytoskeletal 16;Keratin, type I cytoskeletal 15;Keratin, type I cytoskeletal 14;Keratin, type I cytoskeletal 27;Keratin, type I cytoskeletal 25	yes	no	2	0.021822	78.149		1	1	1	1
VVMYEGK	YRWRLSHRPKTGYIRVVMYEGKKIMADSGP	RPKTGYIRVVMYEGKKIMADSGPIYDKTYA	R	V	V	G	K	K	0	0	0	0	0	0	1	1	0	0	0	1	1	0	0	0	0	0	1	2	0	0	7	0	824.41	P35441;Q80YQ1;CON__Q28194	P35441	1123	1129	Thbs1	Thrombospondin-1	no	no	2	0.040684	78.616	1
WELLQQVDTSTR	KVRFLEQQNQVLQTKWELLQQVDTSTRTHN	QTKWELLQQVDTSTRTHNLEPYFESFINNL	K	W	E	T	R	T	0	1	0	1	0	2	1	0	0	0	2	0	0	0	0	1	2	1	0	1	0	0	12	0	1474.74	CON__P04264	CON__P04264	212	223			yes	yes	2	8.7404E-20	147.95				1	2
YEELQITAGR	AQKSKAEAESLYQSKYEELQITAGRHGDSV	LYQSKYEELQITAGRHGDSVRNSKIEISEL	K	Y	E	G	R	H	1	1	0	0	0	1	2	1	0	1	1	0	0	0	0	0	1	0	1	0	0	0	10	0	1178.59	CON__P04264	CON__P04264	377	386			yes	yes	2	2.1507E-38	176.79	2	2	2	2	2
YEYFEVGDHWAR	TGKDCGTEKCFDETRYEYFEVGDHWARVSE	ETRYEYFEVGDHWARVSEGHVEQCGCMEGQ	R	Y	E	A	R	V	1	1	0	1	0	0	2	1	1	0	0	0	0	1	0	0	0	1	2	1	0	0	12	0	1570.68	Q9R098	Q9R098	205	216	Hgfac	Hepatocyte growth factor activator;Hepatocyte growth factor activator short chain;Hepatocyte growth factor activator long chain	yes	yes	3	0.0020545	77.062	1	2	2	2	2
YGQHGSGSR	SRGERHRSSSGSSSSYGQHGSGSRQSLGHG	SGSSSSYGQHGSGSRQSLGHGRQGSGSRQS	S	Y	G	S	R	Q	0	1	0	0	0	1	0	3	1	0	0	0	0	0	0	2	0	0	1	0	0	0	9	0	947.421	CON__Q86YZ3	CON__Q86YZ3	283	291			yes	no	3	0.027313	37.344			1
YPLYVLK	PDMLQKIYIGSSFEKYPLYVLKVSGKEQRI	YIGSSFEKYPLYVLKVSGKEQRIKNAIWID	K	Y	P	L	K	V	0	0	0	0	0	0	0	0	0	0	2	1	0	0	1	0	0	0	2	1	0	0	7	0	894.521	Q9JHH6	Q9JHH6	155	161	Cpb2	Carboxypeptidase B2	no	no	2	0.036834	91.093			1	1
YTHGSGSESLYLAPGGSDDWIYDLGIK	SEAVRAIESINKNTRYTHGSGSESLYLAPG	APGGSDDWIYDLGIKYSFTIELRDTGRYGF	R	Y	T	I	K	Y	1	0	0	3	0	0	1	5	1	2	3	1	0	0	1	4	1	1	3	0	0	0	27	0	2900.35	Q9JHH6	Q9JHH6	352	378	Cpb2	Carboxypeptidase B2	no	no	2;3	2.928E-64	102.67	1	2	2	4	2
AAAFEDQENETVVVK	AVKRASDNLVKAAQKAAAFEDQENETVVVK	AAAFEDQENETVVVKEKMVGGIAQIIAAQE	K	A	A	V	K	E	3	0	1	1	0	1	3	0	0	0	0	1	0	1	0	0	1	0	0	3	0	0	15	0	1648.79	P26039	P26039	2477	2491	Tln1	Talin-1	yes	yes	2;3	4.2452E-07	110.08	1	1	2	1	2
AAAITSDLLESLGR	IQDFLEAEDDLSSFRAAAITSDLLESLGRD	RAAAITSDLLESLGRDGHFTLFAPTNEAFE	R	A	A	G	R	D	3	1	0	1	0	0	1	1	0	1	3	0	0	0	0	2	1	0	0	0	0	0	14	0	1415.76	Q62009	Q62009	254	267	Postn	Periostin	yes	yes	2	0.010821	49.5
AADESER	EQLATALQNLEEAEKAADESERGMKVIENR	QNLEEAEKAADESERGMKVIENRAMKDEEK	K	A	A	E	R	G	2	1	0	1	0	0	2	0	0	0	0	0	0	0	0	1	0	0	0	0	0	0	7	0	776.33	Q6IRU2;D3Z6I8;E9Q7Q3;D3Z2H9;P21107;A0A0R4J1P2;E9Q454;E9Q5J9;Q8BP43;Q8BSH3;E9Q450;CON__Q3SX28;B7ZNL3;A2AIM4;S4R2U0;E9Q455;E9Q452;E9Q448;G5E8R2;E9Q456;G5E8R1;E9Q453;G5E8R0;F8WID5;P58771;P58774	Q6IRU2	83	89	Tpm4;Tpm3;Tpm3-rs7;Tpm1;Tpm2	Tropomyosin alpha-4 chain;Tropomyosin alpha-3 chain;Tropomyosin alpha-1 chain;Tropomyosin beta chain	no	no	2	0.026383	96.51	1	1	1		1
AADKDTCFSTEGPNLVTR	TVMDDFAQFLDTCCKAADKDTCFSTEGPNL	KDTCFSTEGPNLVTRCKDALA_________	K	A	A	T	R	C	2	1	1	2	1	0	1	1	0	0	1	1	0	1	1	1	3	0	0	1	0	0	18	1	1923.9	P07724	P07724	585	602	Alb	Serum albumin	yes	yes	2;3	4.2834E-14	114.31	5	3	5	4	5
AAFEWNEEGAGSSPSPGLQPVR	KITGKPVKLTQVEHRAAFEWNEEGAGSSPS	EGAGSSPSPGLQPVRLTFPLDYHLNQPFLF	R	A	A	V	R	L	3	1	1	0	0	1	3	3	0	0	1	0	0	1	3	3	0	1	0	1	0	0	22	0	2285.07	P97298	P97298	359	380	Serpinf1	Pigment epithelium-derived factor	yes	yes	2;3	8.9684E-22	89.659	3	4	3
AAIEHIK	DKLKEFGNTLEDKARAAIEHIKQKEILTKT	NTLEDKARAAIEHIKQKEILTKTRAWFSEA	R	A	A	I	K	Q	2	0	0	0	0	0	1	0	1	2	0	1	0	0	0	0	0	0	0	0	0	0	7	0	780.449	P34928	P34928	54	60	Apoc1	Apolipoprotein C-I;Truncated apolipoprotein C-I	yes	yes	2	0.0097285	116.11	1	2		2	2
AAIEHIKQK	DKLKEFGNTLEDKARAAIEHIKQKEILTKT	LEDKARAAIEHIKQKEILTKTRAWFSEAFG	R	A	A	Q	K	E	2	0	0	0	0	1	1	0	1	2	0	2	0	0	0	0	0	0	0	0	0	0	9	1	1036.6	P34928	P34928	54	62	Apoc1	Apolipoprotein C-I;Truncated apolipoprotein C-I	yes	yes	3	0.0025555	97.635	1		1
AAIEHIKQKEILTK	DKLKEFGNTLEDKARAAIEHIKQKEILTKT	RAAIEHIKQKEILTKTRAWFSEAFGKVKEK	R	A	A	T	K	T	2	0	0	0	0	1	2	0	1	3	1	3	0	0	0	0	1	0	0	0	0	0	14	2	1620.96	P34928	P34928	54	67	Apoc1	Apolipoprotein C-I;Truncated apolipoprotein C-I	yes	yes	4	0.011081	53.403			1
AALAPYNWPVWLGVHDR	PADRQQMDALSRYLRAALAPYNWPVWLGVH	LAPYNWPVWLGVHDRRSEGLYLFENGQRVS	R	A	A	D	R	R	3	1	1	1	0	0	0	1	1	0	2	0	0	0	2	0	0	2	1	2	0	0	17	0	1964.01	O88200	O88200	234	250	Clec11a	C-type lectin domain family 11 member A	yes	yes	3	0.0013143	41.554	2	2
AALGYNILTQEEAQSVYDAK	EDDCHQYEPIPGSERAALGYNILTQEEAQS	NILTQEEAQSVYDAKYYGGQCETVYNGDWR	R	A	A	A	K	Y	4	0	1	1	0	2	2	1	0	1	2	1	0	0	0	1	1	0	2	1	0	0	20	0	2183.07	Q8K182;A2A997;A2A998	Q8K182	152	171	C8a	Complement component C8 alpha chain	yes	no	2;3	0	172.93	4	2	3	2	3
AALTEVSLGSIYQAMILGADSK	GRFKEHHAKFSLDGRAALTEVSLGSIYQAM	LGSIYQAMILGADSKNIFNFKLSREGLRLS	R	A	A	S	K	N	4	0	0	1	0	1	1	2	0	2	3	1	1	0	0	3	1	0	1	1	0	0	22	0	2237.16	E9Q414;E9Q1Y3	E9Q414	1703	1724	Apob	Apolipoprotein B-100;Apolipoprotein B-48	yes	no	2;3	3.4583E-08	81.619	1		1	3	2
AAPLSLCALTAVDQSVLLLKPEAK	SAQSLPASDTHLKVKAAPLSLCALTAVDQS	TAVDQSVLLLKPEAKLSPQSIYNLLPGKTV	K	A	A	A	K	L	5	0	0	1	1	1	1	0	0	0	6	2	0	0	2	2	1	0	0	2	0	0	24	1	2450.38	Q61838	Q61838	588	611	A2m	Alpha-2-macroglobulin;Alpha-2-macroglobulin 165 kDa subunit;Alpha-2-macroglobulin 35 kDa subunit	yes	yes	3	8.5182E-05	43.523			1
AAPQLPMEELVSLSK	GKDTLQRHFLVKFTKAAPQLPMEELVSLSK	AAPQLPMEELVSLSKEMVAALTTCCTLSDE	K	A	A	S	K	E	2	0	0	0	0	1	2	0	0	0	3	1	1	0	2	2	0	0	0	1	0	0	15	0	1611.85	O89020	O89020	438	452	Afm	Afamin	yes	yes	2;3	4.6078E-07	109.72	3	2	3	1
AAQGEPQVQFK	______________________________	______________________________	M	A	A	F	K	L	2	0	0	0	0	3	1	1	0	0	0	1	0	1	1	0	0	0	0	1	0	0	11	0	1201.61	P62827;Q61820	P62827	2	12	Ran;Rasl2-9	GTP-binding nuclear protein Ran;GTP-binding nuclear protein Ran, testis-specific isoform	yes	no	2	0.00010953	124.98				2
AASWLTHQGSFHGAFR	LHLLLREGKGKMADKAASWLTHQGSFHGAF	ASWLTHQGSFHGAFRSTQDTVVTLDALSAY	K	A	A	F	R	S	3	1	0	0	0	1	0	2	2	0	1	0	0	2	0	2	1	1	0	0	0	0	16	0	1771.85	P01029	P01029	1281	1296	C4b	Complement C4-B;Complement C4 beta chain;Complement C4 alpha chain;C4a anaphylatoxin;Complement C4 gamma chain	yes	yes	3;4	1.4559E-26	126.88	3	4	4	4	4
AATAPLLEAVDNLSAFASNPEFSSVPAQISPEGR	ALDGDFTEENRAQCRAATAPLLEAVDNLSA	PEFSSVPAQISPEGRAAMEPIVISAKTMLE	R	A	A	G	R	A	7	1	2	1	0	1	3	1	0	1	3	0	0	2	4	5	1	0	0	2	0	0	34	0	3455.72	P26039	P26039	1560	1593	Tln1	Talin-1	yes	yes	3;4	3.7743000000000003E-35	78.043	2	2	3	2	2
AAVAASGLNTVLEGDGQFTLLAPTNEAFEK	IQQIIEIEDTFETLRAAVAASGLNTVLEGD	GQFTLLAPTNEAFEKIPAETLNRILGDPEA	R	A	A	E	K	I	6	0	2	1	0	1	3	3	0	0	4	1	0	2	1	1	3	0	0	2	0	0	30	0	3033.53	P82198;Q3UXJ2	P82198	258	287	Tgfbi	Transforming growth factor-beta-induced protein ig-h3	yes	no	3	4.8361E-13	48.76		1			1
AAVASLLQSVQVPEFTPK	NLFAQTYGLTGSQDRAAVASLLQSVQVPEF	ASLLQSVQVPEFTPKSGVKIHVSDQELQSA	R	A	A	P	K	S	3	0	0	0	0	2	1	0	0	0	2	1	0	1	2	2	1	0	0	3	0	0	18	0	1884.04	Q02053	Q02053	785	802	Uba1	Ubiquitin-like modifier-activating enzyme 1	yes	yes	3	0.006027	24.41					1
AAVFNHFISDGVK	VIVPLKIGQQEVEVKAAVFNHFISDGVKKT	VKAAVFNHFISDGVKKTLKVVPEGMRINKT	K	A	A	V	K	K	2	0	1	1	0	0	0	1	1	1	0	1	0	2	0	1	0	0	0	2	0	0	13	0	1403.72	P01027	P01027	914	926	C3	Complement C3;Complement C3 beta chain;C3-beta-c;Complement C3 alpha chain;C3a anaphylatoxin;Acylation stimulating protein;Complement C3b alpha chain;Complement C3c alpha chain fragment 1;Complement C3dg fragment;Complement C3g fragment;Complement C3d fragment;Complement C3f fragment;Complement C3c alpha chain fragment 2	yes	yes	2;3	2.5894E-140	192.3	5	7	7	7	9
AAVFNHFISDGVKK	VIVPLKIGQQEVEVKAAVFNHFISDGVKKT	KAAVFNHFISDGVKKTLKVVPEGMRINKTV	K	A	A	K	K	T	2	0	1	1	0	0	0	1	1	1	0	2	0	2	0	1	0	0	0	2	0	0	14	1	1531.81	P01027	P01027	914	927	C3	Complement C3;Complement C3 beta chain;C3-beta-c;Complement C3 alpha chain;C3a anaphylatoxin;Acylation stimulating protein;Complement C3b alpha chain;Complement C3c alpha chain fragment 1;Complement C3dg fragment;Complement C3g fragment;Complement C3d fragment;Complement C3f fragment;Complement C3c alpha chain fragment 2	yes	yes	2;3;4	3.2555E-08	110.29	2	1	3	2	2
AAVLGESAGLVR	GDIKDKVTAWKQYRKAAVLGESAGLVRASG	YRKAAVLGESAGLVRASGRNMEQFTIHITV	K	A	A	V	R	A	3	1	0	0	0	0	1	2	0	0	2	0	0	0	0	1	0	0	0	2	0	0	12	0	1141.65	Q61702;F8WJ05	Q61702	123	134	Itih1	Inter-alpha-trypsin inhibitor heavy chain H1	yes	no	2	0.0013393	83.783	2	2	2		2
AAVPSGASTGIYEALELR	PTVEVDLYTAKGLFRAAVPSGASTGIYEAL	PSGASTGIYEALELRDNDKTRFMGKGVSQA	R	A	A	L	R	D	4	1	0	0	0	0	2	2	0	1	2	0	0	0	1	2	1	0	1	1	0	0	18	0	1803.94	P17182;B0QZL1;B1ARR7;P21550;A0A0N4SUI6;B1ARR6;Q5SX61;Q5SX60;D3YVD3;D3Z2S4;Q5SX59;D3Z6E4;A0A0N4SUX5;P17183	P17182	33	50	Eno1;Eno3;Eno2	Alpha-enolase;Enolase;Beta-enolase;Gamma-enolase	yes	no	2;3	6.8126E-05	77.912	2	1	2	1	3
AAVSCLWGK	______________________________	LTDAEKAAVSCLWGKVNSDEVGGEALGRLL	K	A	A	G	K	V	2	0	0	0	1	0	0	1	0	0	1	1	0	0	0	1	0	1	0	1	0	0	9	0	933.474	P02088	P02088	10	18	Hbb-b1	Hemoglobin subunit beta-1	yes	yes	2	0.017153	75.109			1		1
AAVSGLWGK	______________________________	LTDAEKAAVSGLWGKVNADEVGGEALGRLL	K	A	A	G	K	V	2	0	0	0	0	0	0	2	0	0	1	1	0	0	0	1	0	1	0	1	0	0	9	0	887.486	A8DUK4;E9Q223	A8DUK4	10	18	Hbbt1;Hbb-bs		yes	no	1;2	0.00014663	130.04	2	4	2	2	2
AAVSGLWGKVNADEVGGEALGR	______________________________	GKVNADEVGGEALGRLLVVYPWTQRYFDSF	K	A	A	G	R	L	4	1	1	1	0	0	2	5	0	0	2	1	0	0	0	1	0	1	0	3	0	0	22	1	2155.1	A8DUK4;E9Q223	A8DUK4	10	31	Hbbt1;Hbb-bs		yes	no	3	4.9201E-05	53.059			2		1
AAVVSADELSESPEMTEEQLLDSFHLMAPSR	PATSTLFSSQHEEAKAAVVSADELSESPEM	EEQLLDSFHLMAPSREDQPILWNAISTYSS	K	A	A	S	R	E	4	1	0	2	0	1	5	0	1	0	4	0	2	1	2	5	1	0	0	2	0	0	31	0	3388.58	P47876	P47876	128	158	Igfbp1	Insulin-like growth factor-binding protein 1	yes	yes	3	4.3508E-16	55.413					1
ACNLDVAGIIADYAASLLPAGR	VCEANANVGFIAFDKACNLDVAGIIADYAA	GIIADYAASLLPAGRLTRRMSLLSVVSTAS	K	A	C	G	R	L	6	1	1	2	1	0	0	2	0	2	3	0	0	0	1	1	0	0	1	1	0	0	22	0	2173.12	Q80WS1	Q80WS1	290	311	Rimklb	Beta-citrylglutamate synthase B	yes	yes	2	0.018249	49.31			1	1
ADAEGESDLENSR	RILAQATSDLVNAIKADAEGESDLENSRKL	IKADAEGESDLENSRKLLSAAKILADATAK	K	A	D	S	R	K	2	1	1	2	0	0	3	1	0	0	1	0	0	0	0	2	0	0	0	0	0	0	13	0	1391.58	P26039	P26039	842	854	Tln1	Talin-1	yes	yes	2	0.00080984	105.46				1	2
ADAEGESDLENSRK	RILAQATSDLVNAIKADAEGESDLENSRKL	KADAEGESDLENSRKLLSAAKILADATAKM	K	A	D	R	K	L	2	1	1	2	0	0	3	1	0	0	1	1	0	0	0	2	0	0	0	0	0	0	14	1	1519.67	P26039	P26039	842	855	Tln1	Talin-1	yes	yes	3	0.00019131	88.075			2		2
ADAVQEATFQVELPR	SRFAHTVVTSRVVNRADAVQEATFQVELPR	ADAVQEATFQVELPRKAFITNFSMIIDGVT	R	A	D	P	R	K	3	1	0	1	0	2	2	0	0	0	1	0	0	1	1	0	1	0	0	2	0	0	15	0	1672.84	A6X935;E9Q5L2;E9PVD2;A0A2K6EDJ7	E9PVD2	61	75	Itih4	Inter alpha-trypsin inhibitor, heavy chain 4	no	no	2;3	3.2077E-48	180.2	4	4	4	4	3
ADAVQEATFQVELPRK	SRFAHTVVTSRVVNRADAVQEATFQVELPR	DAVQEATFQVELPRKAFITNFSMIIDGVTY	R	A	D	R	K	A	3	1	0	1	0	2	2	0	0	0	1	1	0	1	1	0	1	0	0	2	0	0	16	1	1800.94	A6X935;E9Q5L2;E9PVD2;A0A2K6EDJ7	E9PVD2	61	76	Itih4	Inter alpha-trypsin inhibitor, heavy chain 4	no	no	3	0.00047607	61.097				2	2
ADDIQKR	QEDAARLQAAYAGDKADDIQKRENEVLEAW	QAAYAGDKADDIQKRENEVLEAWKSLLDAC	K	A	D	K	R	E	1	1	0	2	0	1	0	0	0	1	0	1	0	0	0	0	0	0	0	0	0	0	7	1	844.44	A0A0A0MQG2;Q62261	A0A0A0MQG2	1879	1885	Sptbn1	Spectrin beta chain, non-erythrocytic 1	yes	no	2	0.012151	139.92	1		2
ADHGEPIGR	QYAWESSAGGSFTVRADHGEPIGRGTKVIL	GSFTVRADHGEPIGRGTKVILHLKEDQTEY	R	A	D	G	R	G	1	1	0	1	0	0	1	2	1	1	0	0	0	0	1	0	0	0	0	0	0	0	9	0	950.457	P11499	P11499	169	177	Hsp90ab1	Heat shock protein HSP 90-beta	yes	yes	3	0.0042005	71.692				2	2
ADHHATNGVVHLIDK	YPNGIVTVNCARLLKADHHATNGVVHLIDK	ADHHATNGVVHLIDKVISTITNNIQQIIEI	K	A	D	D	K	V	2	0	1	2	0	0	0	1	3	1	1	1	0	0	0	0	1	0	0	2	0	0	15	0	1625.83	P82198;Q3UXJ2	P82198	220	234	Tgfbi	Transforming growth factor-beta-induced protein ig-h3	yes	no	4	0.013285	27.85		1
ADIGCTPGSGK	KNKLTQSKIWDVVEKADIGCTPGSGKNYAG	VVEKADIGCTPGSGKNYAGVFMDAGLAFKT	K	A	D	G	K	N	1	0	0	1	1	0	0	3	0	1	0	1	0	0	1	1	1	0	0	0	0	0	11	0	1004.46	P01027	P01027	622	632	C3	Complement C3;Complement C3 beta chain;C3-beta-c;Complement C3 alpha chain;C3a anaphylatoxin;Acylation stimulating protein;Complement C3b alpha chain;Complement C3c alpha chain fragment 1;Complement C3dg fragment;Complement C3g fragment;Complement C3d fragment;Complement C3f fragment;Complement C3c alpha chain fragment 2	yes	yes	2	0.00082784	93.096	1		1	1	2
ADKPLSIHPQGIK	YAEVGDVIKVHFRNKADKPLSIHPQGIKYS	NKADKPLSIHPQGIKYSKFSEGASYADHTF	K	A	D	I	K	Y	1	0	0	1	0	1	0	1	1	2	1	2	0	0	2	1	0	0	0	0	0	0	13	1	1402.79	O88783	O88783	105	117	F5	Coagulation factor V;Coagulation factor V heavy chain;Coagulation factor V light chain	yes	yes	4	0.0008623	66.393	2	2	2	2	1
ADLINNLGTIAK	DRTLTIVDTGIGMTKADLINNLGTIAKSGT	MTKADLINNLGTIAKSGTKAFMEALQAGAD	K	A	D	A	K	S	2	0	2	1	0	0	0	1	0	2	2	1	0	0	0	0	1	0	0	0	0	0	12	0	1241.7	P11499;P07901;B7ZC50	P07901	101	112	Hsp90ab1;Hsp90aa1	Heat shock protein HSP 90-beta;Heat shock protein HSP 90-alpha	no	no	2	0.0013669	96.89	1		1
ADLSGLYSPIK	AYNTKDKIGVELSGRADLSGLYSPIKLPFF	LSGRADLSGLYSPIKLPFFYSEPVNVLNGL	R	A	D	I	K	L	1	0	0	1	0	0	0	1	0	1	2	1	0	0	1	2	0	0	1	0	0	0	11	0	1162.62	E9Q414;E9Q1Y3	E9Q414	2014	2024	Apob	Apolipoprotein B-100;Apolipoprotein B-48	yes	no	2	0.0021986	87.806	1	1	2
ADMQNLVER	______________________________	______________________________	M	A	D	E	R	L	1	1	1	1	0	1	1	0	0	0	1	0	1	0	0	0	0	0	0	1	0	0	9	0	1074.51	P40124;B1ARS0	P40124	2	10	Cap1	Adenylyl cyclase-associated protein 1;Adenylyl cyclase-associated protein	yes	no	2	0.0019332	113.62	1	1	1	1	2
ADQDSEAMKR	VAASTAQLLVACKVKADQDSEAMKRLQAAG	ACKVKADQDSEAMKRLQAAGNAVKRASDNL	K	A	D	K	R	L	2	1	0	2	0	1	1	0	0	0	0	1	1	0	0	1	0	0	0	0	0	0	10	1	1149.51	P26039;E9PUM4;A0A1L1SQ51;Q71LX4;Q8CDM9;A0A1L1SRI1;A0A1L1SQP9	P26039	2446	2455	Tln1;Tln2	Talin-1;Talin-2	yes	no	3	0.012323	60.518					2
ADRDQYELLCLDNTR	AFVKHTTIFEVLPEKADRDQYELLCLDNTR	ADRDQYELLCLDNTRKPVDQYEDCYLARIP	K	A	D	T	R	K	1	2	1	3	1	1	1	0	0	0	3	0	0	0	0	0	1	0	1	0	0	0	15	1	1823.85	Q921I1	Q921I1	237	251	Tf	Serotransferrin	yes	yes	3	0.0013003	70.281			2
ADSFLLENTLPSK	VDICPTMKIHTALDKADSFLLENTLPSKST	DKADSFLLENTLPSKSTFTLAIVAYALSLG	K	A	D	S	K	S	1	0	1	1	0	0	1	0	0	0	3	1	0	1	1	2	1	0	0	0	0	0	13	0	1433.74	P06684	P06684	1175	1187	C5	Complement C5;Complement C5 beta chain;Complement C5 alpha chain;C5a anaphylatoxin;Complement C5 alpha chain	yes	yes	2;3	6.686800000000001E-27	176.48		1	2	2
ADYLALVFER	PAKLNDIDGFFTRNKADYLALVFEREDSYL	FTRNKADYLALVFEREDSYLGREVTLDLSQ	K	A	D	E	R	E	2	1	0	1	0	0	1	0	0	0	2	0	0	1	0	0	0	0	1	1	0	0	10	0	1195.62	Q8BND5	Q8BND5	188	197	Qsox1	Sulfhydryl oxidase 1	yes	yes	2	0.00993	74.464		2	1		1
AEASQLGHK	QEISHLIEPLASAARAEASQLGHKVSQMAQ	LASAARAEASQLGHKVSQMAQYFEPLTLAA	R	A	E	H	K	V	2	0	0	0	0	1	1	1	1	0	1	1	0	0	0	1	0	0	0	0	0	0	9	0	939.477	P26039	P26039	1722	1730	Tln1	Talin-1	yes	yes	3	0.0071936	58.981		1	2		1
AEATTLHAAPQGAAMAVSTFR	AVGSSCRFLQEQGHRAEATTLHAAPQGAAM	HAAPQGAAMAVSTFRKLDGICWQVRQLFEN	R	A	E	F	R	K	7	1	0	0	0	1	1	1	1	0	1	0	1	1	1	1	3	0	0	1	0	0	21	0	2100.04	Q8VCG4;Q9DAC2	Q8VCG4	70	90	C8g	Complement component C8 gamma chain	yes	no	2;3;4	1.3001E-150	163.41	3	5	3	2	2
AEDEHLGILGPPIHANVGDK	RQFTDSSFREQVKRRAEDEHLGILGPPIHA	LGILGPPIHANVGDKVKVVFKNMATRPYSI	R	A	E	D	K	V	2	0	1	2	0	0	2	3	2	2	2	1	0	0	2	0	0	0	0	1	0	0	20	0	2081.05	G3X9T8;G3X8Q5	G3X9T8	794	813	Cp		no	no	3;4	1.7636E-05	72.086	3	2	2	3	3
AEDEHLGILGPPIHANVGDKVK	RQFTDSSFREQVKRRAEDEHLGILGPPIHA	ILGPPIHANVGDKVKVVFKNMATRPYSIHA	R	A	E	V	K	V	2	0	1	2	0	0	2	3	2	2	2	2	0	0	2	0	0	0	0	2	0	0	22	1	2308.22	G3X9T8;G3X8Q5	G3X9T8	794	815	Cp		no	no	4;5	0.0062995	29.476			1	1	1
AEEDFSK	AVQNAKKKDDAKMAKAEEDFSKAQIVFEDL	KDDAKMAKAEEDFSKAQIVFEDLNQELLEE	K	A	E	S	K	A	1	0	0	1	0	0	2	0	0	0	0	1	0	1	0	1	0	0	0	0	0	0	7	0	824.355	S4R270;S4R1B8;A0A5F8MQ05;D3Z6Q9;S4R2J8	S4R270	173	179	Bin2	Bridging integrator 2	yes	no	2	0.041301	81.784				1
AEEYEFLTPMEEAPK	KIDKTDYMVGSYGPRAEEYEFLTPMEEAPK	AEEYEFLTPMEEAPKGMLARGSYNIKSRFT	R	A	E	P	K	G	2	0	0	0	0	0	5	0	0	0	1	1	1	1	2	0	1	0	1	0	0	0	15	0	1782.8	Q99PT1	Q99PT1	153	167	Arhgdia	Rho GDP-dissociation inhibitor 1	yes	yes	2	0.03987	56.936					1
AEFDTSEIDSEIAALR	GLKGAVGPKGDRGDRAEFDTSEIDSEIAAL	EFDTSEIDSEIAALRSELRALRNWVLFSLS	R	A	E	L	R	S	3	1	0	2	0	0	3	0	0	2	1	0	0	1	0	2	1	0	0	0	0	0	16	0	1765.84	P41317	P41317	97	112	Mbl2	Mannose-binding protein C	yes	yes	2;3	1.0877E-133	177.1	1	2	2
AEGDAAALNR	GLQRELDGERERREKAEGDAAALNRRIQLL	ERREKAEGDAAALNRRIQLLEEELDRAQEQ	K	A	E	N	R	R	4	1	1	1	0	0	1	1	0	0	1	0	0	0	0	0	0	0	0	0	0	0	10	0	986.478	Q6IRU2	Q6IRU2	45	54	Tpm4	Tropomyosin alpha-4 chain	yes	yes	2	0.0027258	93.429		2	1		2
AEGDGVYTLNDEK	EHLVRYRCRQFYRLRAEGDGVYTLNDEKQW	LRAEGDGVYTLNDEKQWVNTVAGEKLPECE	R	A	E	E	K	Q	1	0	1	2	0	0	2	2	0	0	1	1	0	0	0	0	1	0	1	1	0	0	13	0	1409.63	Q61646	Q61646	60	72	Hp	Haptoglobin;Haptoglobin alpha chain;Haptoglobin beta chain	yes	yes	2	1.4130999999999998E-28	149.96				3	1
AEGIPEFYDYDVALVK	EEVLFHPKYNINGKKAEGIPEFYDYDVALV	EGIPEFYDYDVALVKLKNKLKYGQTLRPIC	K	A	E	V	K	L	2	0	0	2	0	0	2	1	0	1	1	1	0	1	1	0	0	0	2	2	0	0	16	0	1827.89	B8JJN0;F6VQX8;B8JJM5;P04186;F6XQ00;B8JJM6;H3BK95;F6W2T4;B8JJM3	B8JJN0	1078	1093	Gm20547;Cfb	Complement factor B;Complement factor B Ba fragment;Complement factor B Bb fragment	yes	no	2;3	0.0017625	81.431	3	2	2
AEIVASVTAK	DANANIQNVTTSGNKAEIVASVTAKGESQF	TSGNKAEIVASVTAKGESQFEALNFDFQAQ	K	A	E	A	K	G	3	0	0	0	0	0	1	0	0	1	0	1	0	0	0	1	1	0	0	2	0	0	10	0	987.56	E9Q414;E9Q1Y3	E9Q414	2781	2790	Apob	Apolipoprotein B-100;Apolipoprotein B-48	yes	no	2	6.7774E-05	120.12	2	2	2		1
AEMDLSGR	FEDGILDTCLYVMDKAEMDLSGRGNPIKVS	CLYVMDKAEMDLSGRGNPIKVSRVGSAMVN	K	A	E	G	R	G	1	1	0	1	0	0	1	1	0	0	1	0	1	0	0	1	0	0	0	0	0	0	8	0	877.396	Q8BH61	Q8BH61	246	253	F13a1	Coagulation factor XIII A chain	yes	yes	2	0.0039338	112.37		2	1	2
AEMTGEHNANLNGK	SILTANGRALLKDAKAEMTGEHNANLNGKV	KAEMTGEHNANLNGKVIGTLKNSLFFSAQP	K	A	E	G	K	V	2	0	3	0	0	0	2	2	1	0	1	1	1	0	0	0	1	0	0	0	0	0	14	0	1484.67	E9Q414;E9Q1Y3	E9Q414	3009	3022	Apob	Apolipoprotein B-100;Apolipoprotein B-48	yes	no	2;3	2.1041E-07	108.7	1	2	2	4	2
AENNPWVTPIADQFQLGVSHVFEYIR	ELGNLDLTGQKQVFKAENNPWVTPIADQFQ	DQFQLGVSHVFEYIRSETYKYLYGRHMQAN	K	A	E	I	R	S	2	1	2	1	0	2	2	1	1	2	1	0	0	2	2	1	1	1	1	3	0	0	26	0	3029.5	A2AUR7;Q9D031;Q01730	A2AUR7	196	221	Rsu1	Ras suppressor protein 1	yes	no	3	0.03777	17.216		1
AENPTNPGPGGSGYWR	GDSRGDFATRGPGSKAENPTNPGPGGSGYW	ENPTNPGPGGSGYWRPGNSGSGSDGNRNPG	K	A	E	W	R	P	1	1	2	0	0	0	1	4	0	0	0	0	0	0	3	1	1	1	1	0	0	0	16	0	1658.74	E9PV24	E9PV24	296	311	Fga	Fibrinogen alpha chain;Fibrinopeptide A;Fibrinogen alpha chain	yes	yes	2;3	4.9302E-40	152.38	2	2	2	3	2
AENYDISPADR	SNFHMDFIVAASNLRAENYDISPADRHKSK	SNLRAENYDISPADRHKSKLIAGKIIPAIA	R	A	E	D	R	H	2	1	1	2	0	0	1	0	0	1	0	0	0	0	1	1	0	0	1	0	0	0	11	0	1249.56	Q02053	Q02053	870	880	Uba1	Ubiquitin-like modifier-activating enzyme 1	yes	yes	2	0.020043	53.683				1
AEPLALIVSHDYK	WGEHTGQLYSKFLLKAEPLALIVSHDYKGS	LKAEPLALIVSHDYKGSTSHSLPYESSIST	K	A	E	Y	K	G	2	0	0	1	0	0	1	0	1	1	2	1	0	0	1	1	0	0	1	1	0	0	13	0	1454.78	E9Q414;E9Q1Y3	E9Q414	1936	1948	Apob	Apolipoprotein B-100;Apolipoprotein B-48	yes	no	2;3	0.0026023	61.833	2	2	3	2
AEPLYELVTATDFAYSSTVK	WGDAVKYNPAIIKIKAEPLYELVTATDFAY	ELVTATDFAYSSTVKQNLKKALEEFQSEVS	K	A	E	V	K	Q	3	0	0	1	0	0	2	0	0	0	2	1	0	1	1	2	3	0	2	2	0	0	20	0	2204.09	Q8BH35	Q8BH35	466	485	C8b	Complement component C8 beta chain	yes	yes	2;3	3.3658E-08	132.86	2	4	4	3	4
AEPVGPWSQVEGMEDWEK	LNDQAFFHYNSNSGKAEPVGPWSQVEGMED	VGPWSQVEGMEDWEKESQLQRAREEIFLVT	K	A	E	E	K	E	1	0	0	1	0	1	4	2	0	0	0	1	1	0	2	1	0	2	0	2	0	0	18	0	2072.91	Q64726	Q64726	63	80	Azgp1	Zinc-alpha-2-glycoprotein	yes	yes	2;3	8.9423E-16	127.32	2	4	4	2	3
AEPVGPWSQVEGMEDWEKESQLQR	LNDQAFFHYNSNSGKAEPVGPWSQVEGMED	VEGMEDWEKESQLQRAREEIFLVTLKDIMD	K	A	E	Q	R	A	1	1	0	1	0	3	5	2	0	0	1	1	1	0	2	2	0	2	0	2	0	0	24	1	2814.29	Q64726	Q64726	63	86	Azgp1	Zinc-alpha-2-glycoprotein	yes	yes	3;4	7.1046E-12	65.207	2	2	1	1
AESPVFVQTDKPIYK	PTQRFIKKKSIQIIKAESPVFVQTDKPIYK	AESPVFVQTDKPIYKPGQIVKFRVVSVDIS	K	A	E	Y	K	P	1	0	0	1	0	1	1	0	0	1	0	2	0	1	2	1	1	0	1	2	0	0	15	1	1720.9	Q61838;D3YUI3	Q61838	123	137	A2m;Pzp	Alpha-2-macroglobulin;Alpha-2-macroglobulin 165 kDa subunit;Alpha-2-macroglobulin 35 kDa subunit	yes	no	3	0.00060014	95.651	2	2	1	1	2
AESPVFVQTDKPIYKPGQIVK	PTQRFIKKKSIQIIKAESPVFVQTDKPIYK	VQTDKPIYKPGQIVKFRVVSVDISFRPLNE	K	A	E	V	K	F	1	0	0	1	0	2	1	1	0	2	0	3	0	1	3	1	1	0	1	3	0	0	21	2	2343.28	Q61838;D3YUI3	Q61838	123	143	A2m;Pzp	Alpha-2-macroglobulin;Alpha-2-macroglobulin 165 kDa subunit;Alpha-2-macroglobulin 35 kDa subunit	yes	no	2;3;4	3.0726E-12	107.3	4	4	3	4	4
AETFTFHSDICTLPEK	SALTVDETYVPKEFKAETFTFHSDICTLPE	ETFTFHSDICTLPEKEKQIKKQTALAELVK	K	A	E	E	K	E	1	0	0	1	1	0	2	0	1	1	1	1	0	2	1	1	3	0	0	0	0	0	16	0	1837.86	P07724	P07724	528	543	Alb	Serum albumin	yes	yes	2;3	0.00082114	62.646	2	1	3	2	2
AETFTFHSDICTLPEKEK	SALTVDETYVPKEFKAETFTFHSDICTLPE	FTFHSDICTLPEKEKQIKKQTALAELVKHK	K	A	E	E	K	Q	1	0	0	1	1	0	3	0	1	1	1	2	0	2	1	1	3	0	0	0	0	0	18	1	2094.99	P07724	P07724	528	545	Alb	Serum albumin	yes	yes	2;3;4	1.604E-13	113.69	6	4	5	3	4
AEVDDVIQVR	AEYEEHLGILGPVIRAEVDDVIQVRFKNLA	GPVIRAEVDDVIQVRFKNLASRPYSLHAHG	R	A	E	V	R	F	1	1	0	2	0	1	1	0	0	1	0	0	0	0	0	0	0	0	0	3	0	0	10	0	1142.59	O88783;CON__Q28107	O88783	1610	1619	F5	Coagulation factor V;Coagulation factor V heavy chain;Coagulation factor V light chain	yes	no	2	1.0643000000000001E-77	193.41	2	2	1	2	2
AEYEEHLGILGPVIR	FRKYLDSTFTSRDPRAEYEEHLGILGPVIR	AEYEEHLGILGPVIRAEVDDVIQVRFKNLA	R	A	E	I	R	A	1	1	0	0	0	0	3	2	1	2	2	0	0	0	1	0	0	0	1	1	0	0	15	0	1694.9	O88783	O88783	1595	1609	F5	Coagulation factor V;Coagulation factor V heavy chain;Coagulation factor V light chain	yes	yes	2;3	5.1271E-11	116.55	3	2	3	2	2
AFAQAQSHIFIEK	GNTPGNTWLTAFVLKAFAQAQSHIFIEKTH	LKAFAQAQSHIFIEKTHITNAFNWLSMKQK	K	A	F	E	K	T	3	0	0	0	0	2	1	0	1	2	0	1	0	2	0	1	0	0	0	0	0	0	13	0	1488.77	Q61838	Q61838	1061	1073	A2m	Alpha-2-macroglobulin;Alpha-2-macroglobulin 165 kDa subunit;Alpha-2-macroglobulin 35 kDa subunit	yes	yes	2;3	1.0920000000000001E-75	192.95	3	2	4	4	1
AFELELSWVGELTK	VAKIIYIVHDEVKDKAFELELSWVGELTKG	KAFELELSWVGELTKGRHEIVPKDIREEAE	K	A	F	T	K	G	1	0	0	0	0	0	3	1	0	0	3	1	0	1	0	1	1	1	0	1	0	0	14	0	1620.84	O70435;E0CX62	O70435	209	222	Psma3	Proteasome subunit alpha type-3	yes	no	2	0.019515	42.743	1
AFIFIDESHITHAFTWLSQK	TWLTAFVLKSFAQARAFIFIDESHITHAFT	DESHITHAFTWLSQKQKDNGCFRSSGSLFN	R	A	F	Q	K	Q	2	0	0	1	0	1	1	0	2	3	1	1	0	3	0	2	2	1	0	0	0	0	20	0	2390.21	P28665	P28665	1056	1075	Mug1	Murinoglobulin-1	yes	yes	2;3;4	5.5202E-95	175.28	3	4	6	1
AFIFIDESHITHAFTWLSQQQK	TWLTAFVLKSFAQARAFIFIDESHITHAFT	SHITHAFTWLSQQQKDNGCFRSSGSLFHND	R	A	F	Q	K	D	2	0	0	1	0	3	1	0	2	3	1	1	0	3	0	2	2	1	0	0	0	0	22	0	2646.32	P28666	P28666	1056	1077	Mug2	Murinoglobulin-2	yes	yes	4	3.8983E-08	73.783	2	2
AFLEVNEEGSEAAASTSVVITGR	AGGRDDLYVSDAFHKAFLEVNEEGSEAAAS	GSEAAASTSVVITGRSLNPNRVTFKANRPF	K	A	F	G	R	S	4	1	1	0	0	0	4	2	0	1	1	0	0	1	0	3	2	0	0	3	0	0	23	0	2336.15	P32261	P32261	404	426	Serpinc1	Antithrombin-III	yes	yes	2;3	2.0457E-61	152.94	4	2	3	2	2
AFLQSHYLR	RHSGEKPYECNQCGKAFLQSHYLRMHERTH	CNQCGKAFLQSHYLRMHERTHTGEKPYECN	K	A	F	L	R	M	1	1	0	0	0	1	0	0	1	0	2	0	0	1	0	1	0	0	1	0	0	0	9	0	1133.6	A0A087WSF4;E9Q981	A0A087WSF4	474	482	9830147E19Rik		yes	no	3	0.022427	40.352	1
AFRPFTPQIYK	DDMLPHDSGIRLNTKAFRPFTPQIYKKYPD	LNTKAFRPFTPQIYKKYPDMKLELLGTVVS	K	A	F	Y	K	K	1	1	0	0	0	1	0	0	0	1	0	1	0	2	2	0	1	0	1	0	0	0	11	1	1366.74	Q61805	Q61805	320	330	Lbp	Lipopolysaccharide-binding protein	yes	yes	3	0.019167	48.981		1	2
AFVFSVALAEINRK	QEKEIDIYANLSDEKAFVFSVALAEINRKI	KAFVFSVALAEINRKIINQRLIL_______	K	A	F	R	K	I	3	1	1	0	0	0	1	0	0	1	1	1	0	2	0	1	0	0	0	2	0	0	14	1	1563.88	Q9CR55	Q9CR55	133	146		UPF0547 protein C16orf87 homolog	yes	yes	2	0.025858	46.001		1
AFVHWYTSEGMDISEFGEAESDIHDLVSEYQQFQDVR	FTRVSEHFSAMFRRRAFVHWYTSEGMDISE	IHDLVSEYQQFQDVRAGLEDSEEDVEEAEV	R	A	F	V	R	A	2	1	0	4	0	3	5	2	2	2	1	0	1	3	0	4	1	1	2	3	0	0	37	0	4363.93	A2AQ07	A2AQ07	393	429	Tubb1	Tubulin beta-1 chain	yes	yes	4	0.031801	15.221		1
AFVHWYVGEGMEEGEFSEAR	WARLDHKFDLMYAKRAFVHWYVGEGMEEGE	YVGEGMEEGEFSEAREDMAALEKDYEEVGA	R	A	F	A	R	E	2	1	0	0	0	0	5	3	1	0	0	0	1	2	0	1	0	1	1	2	0	0	20	0	2329.01	A0A0A0MQA5;P68368;P68373;P68369;P05213;P05214	P68373	403	422	Tuba4a;Tuba1c;Tuba1a;Tuba1b;Tuba3a	Tubulin alpha-4A chain;Tubulin alpha-1C chain;Tubulin alpha-1A chain;Tubulin alpha-1B chain;Tubulin alpha-3 chain	no	no	3	8.2394E-07	92.307	2	2	2	2	2
AFWLDLSHNR	QLTMLSEDVLGPLQRAFWLDLSHNRLETPA	GPLQRAFWLDLSHNRLETPAEGLFSSLGRL	R	A	F	N	R	L	1	1	1	1	0	0	0	0	1	0	2	0	0	1	0	1	0	1	0	0	0	0	10	0	1257.63	A0A0R4J0S2;P70389	A0A0R4J0S2	484	493	Igfals	Insulin-like growth factor-binding protein complex acid labile subunit	yes	no	2	0.014388	83.313	1	1
AFYEHAPK	WNIPELVNMGQWKIRAFYEHAPKQIFSAEF	MGQWKIRAFYEHAPKQIFSAEFEVKEYVLP	R	A	F	P	K	Q	2	0	0	0	0	0	1	0	1	0	0	1	0	1	1	0	0	0	1	0	0	0	8	0	961.466	P01027	P01027	209	216	C3	Complement C3;Complement C3 beta chain;C3-beta-c;Complement C3 alpha chain;C3a anaphylatoxin;Acylation stimulating protein;Complement C3b alpha chain;Complement C3c alpha chain fragment 1;Complement C3dg fragment;Complement C3g fragment;Complement C3d fragment;Complement C3f fragment;Complement C3c alpha chain fragment 2	yes	yes	2;3	3.8357E-16	150.84	2	4	2	3	4
AGAEPAPER	TRLLRACEYKGRLSKAGAEPAPERQAESSQ	KGRLSKAGAEPAPERQAESSQVKQ______	K	A	G	E	R	Q	3	1	0	0	0	0	2	1	0	0	0	0	0	0	2	0	0	0	0	0	0	0	9	0	896.435	Q6S9I0;A0A338P699	Q6S9I0	416	424	Kng2		yes	no	2	3.026E-05	137.9	2	2	2	2	2
AGELEVFNGYFVHFFAPENLDPIPK	NGELVVMYDVNREEKAGELEVFNGYFVHFF	FVHFFAPENLDPIPKNILFVIDVSGSMWGI	K	A	G	P	K	N	2	0	2	1	0	0	3	2	1	1	2	1	0	4	3	0	0	0	1	2	0	0	25	0	2849.41	G3X977;Q61703;F6SGM1	G3X977	289	313	Itih2	Inter-alpha-trypsin inhibitor heavy chain H2	yes	no	3	4.7171E-10	59.678	2	2	3	1
AGEQINNHVK	YESEALTIPSKDWTKAGEQINNHVKNKTQG	KDWTKAGEQINNHVKNKTQGKIEHVVSDLD	K	A	G	V	K	N	1	0	2	0	0	1	1	1	1	1	0	1	0	0	0	0	0	0	0	1	0	0	10	0	1108.56	Q06770	Q06770	159	168	Serpina6	Corticosteroid-binding globulin	yes	yes	2;3	0.00025389	85.67	2	2	3	2	1
AGEYIEASYMNLQR	ICEGQVNSLPGSINKAGEYIEASYMNLQRP	KAGEYIEASYMNLQRPYTVAIAGYALALMN	K	A	G	Q	R	P	2	1	1	0	0	1	2	1	0	1	1	0	1	0	0	1	0	0	2	0	0	0	14	0	1643.76	P01027	P01027	1172	1185	C3	Complement C3;Complement C3 beta chain;C3-beta-c;Complement C3 alpha chain;C3a anaphylatoxin;Acylation stimulating protein;Complement C3b alpha chain;Complement C3c alpha chain fragment 1;Complement C3dg fragment;Complement C3g fragment;Complement C3d fragment;Complement C3f fragment;Complement C3c alpha chain fragment 2	yes	yes	2;3	9.0159E-07	152.54	3	3	3	3	3
AGEYIEASYMNLQRPYTVAIAGYALALMNK	ICEGQVNSLPGSINKAGEYIEASYMNLQRP	YTVAIAGYALALMNKLEEPYLGKFLNTAKD	K	A	G	N	K	L	6	1	2	0	0	1	2	2	0	2	3	1	2	0	1	1	1	0	4	1	0	0	30	1	3320.66	P01027	P01027	1172	1201	C3	Complement C3;Complement C3 beta chain;C3-beta-c;Complement C3 alpha chain;C3a anaphylatoxin;Acylation stimulating protein;Complement C3b alpha chain;Complement C3c alpha chain fragment 1;Complement C3dg fragment;Complement C3g fragment;Complement C3d fragment;Complement C3f fragment;Complement C3c alpha chain fragment 2	yes	yes	3;4	3.7655E-16	58.722	2	3	1
AGEYIEASYMNLQRPYTVAIAGYALALMNKLEEPYLGK	ICEGQVNSLPGSINKAGEYIEASYMNLQRP	ALALMNKLEEPYLGKFLNTAKDRNRWEEPD	K	A	G	G	K	F	6	1	2	0	0	1	4	3	0	2	5	2	2	0	2	1	1	0	5	1	0	0	38	2	4250.14	P01027	P01027	1172	1209	C3	Complement C3;Complement C3 beta chain;C3-beta-c;Complement C3 alpha chain;C3a anaphylatoxin;Acylation stimulating protein;Complement C3b alpha chain;Complement C3c alpha chain fragment 1;Complement C3dg fragment;Complement C3g fragment;Complement C3d fragment;Complement C3f fragment;Complement C3c alpha chain fragment 2	yes	yes	4	6.3607E-17	46.898	1	2
AGEYSVTYDGFNTFTIPK	EECSELSMVADKTEKAGEYSVTYDGFNTFT	YSVTYDGFNTFTIPKTDYDNFLMAHLINEK	K	A	G	P	K	T	1	0	1	1	0	0	1	2	0	1	0	1	0	2	1	1	3	0	2	1	0	0	18	0	2008.94	A2BIN1;Q4FZE8;P11589;B8JI96;A2CEK7;A2AKN8;E9PVW0;A2BIN0	A2BIN1	95	112	Mup10;Mup1;Mup2;Mup14;Mup8;Mup11	Major urinary protein 2	no	no	2	0.00043832	81.278			1
AGFAGDDAPR	EIAALVIDNGSGMCKAGFAGDDAPRAVFPS	SGMCKAGFAGDDAPRAVFPSIVGRPRHQGV	K	A	G	P	R	A	3	1	0	2	0	0	0	2	0	0	0	0	0	1	1	0	0	0	0	0	0	0	10	0	975.441	P63260;P60710;E9Q5F4;G3UZ07;E9Q1F2;G3UYG0;E9Q606;B1ATY1;E9Q2D1;F6WX90;P68134;P68033;P63268;P62737;A0A494B9T3;D3YZY0;A0A1D5RM20;D3Z2K3	P63260	19	28	Actg1;Actb;Actc1;Acta1;Actg2;Acta2	Actin, cytoplasmic 2;Actin, cytoplasmic 2, N-terminally processed;Actin, cytoplasmic 1;Actin, cytoplasmic 1, N-terminally processed;Actin, alpha skeletal muscle;Actin, alpha cardiac muscle 1;Actin, gamma-enteric smooth muscle;Actin, aortic smooth muscle	no	no	2	0.0062834	85.676	1	1	1	1	2
AGFYFDGISR	HHCLNSPGSFRCECKAGFYFDGISRTCVDI	RCECKAGFYFDGISRTCVDINECQRYPGRL	K	A	G	S	R	T	1	1	0	1	0	0	0	2	0	1	0	0	0	2	0	1	0	0	1	0	0	0	10	0	1131.53	Q08879	Q08879	388	397	Fbln1	Fibulin-1	yes	yes	2	0.00023802	109.71	2	2	2
AGGSASAMLQPLLDNQVGFK	YSFDPVGSYQRDSFKAGGSASAMLQPLLDN	SAMLQPLLDNQVGFKNMQNVEHVPLTLDRA	K	A	G	F	K	N	3	0	1	1	0	2	0	3	0	0	3	1	1	1	1	2	0	0	0	1	0	0	20	0	2003.01	A0A338P7C0;O09061	A0A338P7C0	64	83	Psmb1	Proteasome subunit beta type-1	yes	no	2;3	9.2517E-06	76.378	2	2	2	2	2
AGISDRK	______________________________	______________________________	M	A	G	R	K	T	1	1	0	1	0	0	0	1	0	1	0	1	0	0	0	1	0	0	0	0	0	0	7	1	745.408	H3BLG3	H3BLG3	2	8	Rab26		yes	yes	2	0.0017654	121.87	2		2	1	1
AGKEPGLQIWR	ARPSTMVVEHPEFLKAGKEPGLQIWRVEKF	EFLKAGKEPGLQIWRVEKFDLVPVPPNLYG	K	A	G	W	R	V	1	1	0	0	0	1	1	2	0	1	1	1	0	0	1	0	0	1	0	0	0	0	11	1	1253.69	P13020;A0A0J9YUQ8;CON__Q3SX14;A6PWS5;A0A0J9YUJ8	P13020	60	70	Gsn	Gelsolin	yes	no	3	1.1467000000000002E-56	164.33	2	2	2	2	2
AGLEDSEEDVEEAEVEAEDKDH	IHDLVSEYQQFQDVRAGLEDSEEDVEEAEV	EDVEEAEVEAEDKDH_______________	R	A	G	D	H	-	3	0	0	4	0	0	8	1	1	0	1	1	0	0	0	1	0	0	0	2	0	0	22	1	2444	A2AQ07	A2AQ07	430	451	Tubb1	Tubulin beta-1 chain	yes	yes	3	3.193E-84	158.18		3	2	2	5
AGLLRPDYK	ALNTVRDALPSCAIRAGLLRPDYKLLGHRQ	PSCAIRAGLLRPDYKLLGHRQLVLTHCPGN	R	A	G	Y	K	L	1	1	0	1	0	0	0	1	0	0	2	1	0	0	1	0	0	0	1	0	0	0	9	1	1031.58	Q8VCS0;A0A494BB01	Q8VCS0	490	498	Pglyrp2	N-acetylmuramoyl-L-alanine amidase	yes	no	3	0.032844	52.591				1
AGLNSLEAVK	______________________________	______________________________	M	A	G	V	K	R	2	0	1	0	0	0	1	1	0	0	2	1	0	0	0	1	0	0	0	1	0	0	10	0	1000.56	Q6IRU2	Q6IRU2	2	11	Tpm4	Tropomyosin alpha-4 chain	yes	yes	2	0.0002908	117.81	1	2	2		2
AGLNSLEAVKR	______________________________	______________________________	M	A	G	K	R	K	2	1	1	0	0	0	1	1	0	0	2	1	0	0	0	1	0	0	0	1	0	0	11	1	1156.66	Q6IRU2	Q6IRU2	2	12	Tpm4	Tropomyosin alpha-4 chain	yes	yes	2	0.00017366	94.692		1	1		2
AGLQAFFQVR	PGVWMLSCQNLNHLKAGLQAFFQVRDCNKP	LNHLKAGLQAFFQVRDCNKPSPEDNIQDRH	K	A	G	V	R	D	2	1	0	0	0	2	0	1	0	0	1	0	0	2	0	0	0	0	0	1	0	0	10	0	1135.61	G3X9T8;G3X8Q5	G3X9T8	345	354	Cp		no	no	2	2.6876E-05	127.84	2	2	2	2	2
AGLQFPVGR	QGGKVRAKAKSRSSRAGLQFPVGRVHRLLR	KSRSSRAGLQFPVGRVHRLLRKGNYAERVG	R	A	G	G	R	V	1	1	0	0	0	1	0	2	0	0	1	0	0	1	1	0	0	0	0	1	0	0	9	0	943.524	A0A0N4SV66;C0HKE3;C0HKE1;C0HKE2;Q8CGP4;C0HKE7;C0HKE5;Q8R1M2;Q64523;C0HKE6;Q8CGP6;C0HKE8;Q8BFU2;Q6GSS7;C0HKE9;Q8CGP5;Q8CGP7;C0HKE4;P27661;Q3THW5;P0C0S6;Q64522;Q3UA95;G3UWL7	A0A0N4SV66	22	30	Hist1h2aa;H2afj;Hist2h2ac;Hist1h2ah;Hist3h2a;Hist2h2aa1;Hist1h2af;Hist1h2ak;H2afx;H2afv;H2afz;Hist2h2ab	Histone H2A;Histone H2A.J;Histone H2A type 2-C;Histone H2A type 1-H;Histone H2A type 3;Histone H2A type 2-A;Histone H2A type 1-F;Histone H2A type 1-K;Histone H2AX;Histone H2A.V;Histone H2A.Z;Histone H2A type 2-B	yes	no	2	0.0030505	127.84
AGPAVPQEAIPLQK	YEEDWPTFLNPNVDKAGPAVPQEAIPLQKE	KAGPAVPQEAIPLQKEQPPPQVHIEQKEID	K	A	G	Q	K	E	3	0	0	0	0	2	1	1	0	1	1	1	0	0	3	0	0	0	0	1	0	0	14	0	1417.79	Q61508;F8WI14;D3Z0U9;D3YV22;D3Z038;D3YV64;D3Z772	Q61508	107	120	Ecm1	Extracellular matrix protein 1	yes	no	2	0.008731	64.297				2
AGQYTDK	RRRRSVQLMERRMDKAGQYTDKGLRKCCED	LMERRMDKAGQYTDKGLRKCCEDGMRDIPM	K	A	G	D	K	G	1	0	0	1	0	1	0	1	0	0	0	1	0	0	0	0	1	0	1	0	0	0	7	0	781.361	P01027	P01027	682	688	C3	Complement C3;Complement C3 beta chain;C3-beta-c;Complement C3 alpha chain;C3a anaphylatoxin;Acylation stimulating protein;Complement C3b alpha chain;Complement C3c alpha chain fragment 1;Complement C3dg fragment;Complement C3g fragment;Complement C3d fragment;Complement C3f fragment;Complement C3c alpha chain fragment 2	yes	yes	1;2	0.0038529	138.85	2	2	2	2	2
AGSSESMR	IQYHCHEPYYKMLTRAGSSESMRGIYTCTA	YYKMLTRAGSSESMRGIYTCTAQGIWKNEE	R	A	G	M	R	G	1	1	0	0	0	0	1	1	0	0	0	0	1	0	0	3	0	0	0	0	0	0	8	0	823.349	Q8CG16;Q8CFG9	Q8CG16	416	423	C1ra;C1rb	Complement C1r-A subcomponent;Complement C1r-A subcomponent heavy chain;Complement C1r-A subcomponent light chain;Complement C1r-B subcomponent;Complement C1r-B subcomponent heavy chain;Complement C1r-B subcomponent light chain	yes	no	2	0.0070727	113.89	2	1	1	1	1
AGTLDLSLSLPGK	KDNTGQIFSVVSNGKAGTLDLSLSLPGKQQ	GKAGTLDLSLSLPGKQQVVSVEEALLATGQ	K	A	G	G	K	Q	1	0	0	1	0	0	0	2	0	0	4	1	0	0	1	2	1	0	0	0	0	0	13	0	1270.71	P35441;Q80YQ1	P35441	125	137	Thbs1	Thrombospondin-1	yes	no	1;2	9.6064E-10	129.16	2	2	4	2	3
AGTTTIEAVK	______________________________	______________________________	M	A	G	V	K	R	2	0	0	0	0	0	1	1	0	1	0	1	0	0	0	0	3	0	0	1	0	0	10	0	989.539	D3Z6I8;E9Q7Q3;D3Z2H9	D3Z6I8	2	11	Tpm3;Tpm3-rs7		yes	no	2	0.0028983	86.67					1
AGTTTIEAVKR	______________________________	______________________________	M	A	G	K	R	K	2	1	0	0	0	0	1	1	0	1	0	1	0	0	0	0	3	0	0	1	0	0	11	1	1145.64	D3Z6I8;E9Q7Q3;D3Z2H9	D3Z6I8	2	12	Tpm3;Tpm3-rs7		yes	no	2	0.0017327	66.692		2	1		2
AGVAPLQVK	VRANLPQSFQVDTSKAGVAPLQVKVQGPKG	QVDTSKAGVAPLQVKVQGPKGLVEPVDVVD	K	A	G	V	K	V	2	0	0	0	0	1	0	1	0	0	1	1	0	0	1	0	0	0	0	2	0	0	9	0	881.533	B7FAV1;B7FAU9;Q8BTM8	B7FAV1	1454	1462	Flna	Filamin-A	yes	no	2	0.028091	65.803	1				1
AGVLAHLEEER	DSNLYRIGQSKVFFRAGVLAHLEEERDLKI	VFFRAGVLAHLEEERDLKITDVIIGFQACC	R	A	G	E	R	D	2	1	0	0	0	0	3	1	1	0	2	0	0	0	0	0	0	0	0	1	0	0	11	0	1222.63	Q8VDD5;Q5SV64;Q3UH59;Q61879	Q8VDD5	765	775	Myh9;Myh10	Myosin-9;Myosin-10	yes	no	3	0.018055	35.737			1
AGYTDQVVIGMDVAASEFYR	ENKEALELLKTAIAKAGYTDQVVIGMDVAA	QVVIGMDVAASEFYRSGKYDLDFKSPDDPS	K	A	G	Y	R	S	3	1	0	2	0	1	1	2	0	1	0	0	1	1	0	1	1	0	2	3	0	0	20	0	2191.03	P17182;Q6PHC1	P17182	234	253	Eno1	Alpha-enolase	yes	no	2;3	2.4797E-05	95.651				1	1
AHCLSEVEHDTMPADLPAIAADFVEDQEVCK	SSKLQTCCDKPLLKKAHCLSEVEHDTMPAD	PAIAADFVEDQEVCKNYAEAKDVFLGTFLY	K	A	H	C	K	N	5	0	0	4	2	1	4	0	2	1	2	1	1	1	2	1	1	0	0	3	0	0	31	0	3382.52	P07724	P07724	311	341	Alb	Serum albumin	yes	yes	4	4.5309E-30	92.121			1
AHFSPANIVIDSSASR	QVPLWDLGATLNFLKAHFSPANIVIDSSAS	HFSPANIVIDSSASRHTGRRGSPEATPELV	K	A	H	S	R	H	3	1	1	1	0	0	0	0	1	2	0	0	0	1	1	4	0	0	0	1	0	0	16	0	1670.84	Q8BND5	Q8BND5	537	552	Qsox1	Sulfhydryl oxidase 1	yes	yes	2;3	6.732700000000001E-20	134.37	2	2	2	2	2
AHFSVMGDILSSAIK	MSLVLPPTVVKDSARAHFSVMGDILSSAIK	AHFSVMGDILSSAIKNTQNLLHMPYGCGEQ	R	A	H	I	K	N	2	0	0	1	0	0	0	1	1	2	1	1	1	1	0	3	0	0	0	1	0	0	15	0	1574.81	P28666	P28666	948	962	Mug2	Murinoglobulin-2	yes	yes	2;3	1.378E-31	138.99	2	4	2	2	2
AHFSVMGDILSSAIR	MSLVLPPTVVKDSARAHFSVMGDILSSAIR	AHFSVMGDILSSAIRNTQNLLHMPYGCGEQ	R	A	H	I	R	N	2	1	0	1	0	0	0	1	1	2	1	0	1	1	0	3	0	0	0	1	0	0	15	0	1602.82	P28665	P28665	948	962	Mug1	Murinoglobulin-1	yes	yes	2;3	6.4566E-179	166.6	3	4	4	4	5
AHGGTNINNAVLLAVELLDR	EENLNKAVNYASRIRAHGGTNINNAVLLAV	NINNAVLLAVELLDRSNQAELLPSKSVSLI	R	A	H	D	R	S	3	1	3	1	0	0	1	2	1	1	4	0	0	0	0	0	1	0	0	2	0	0	20	0	2089.13	A6X935;E9Q5L2;E9PVD2;A0A2K6EDJ7	E9PVD2	346	365	Itih4	Inter alpha-trypsin inhibitor, heavy chain 4	no	no	2;3;4	2.9706E-27	127.5	4	4	3	5	5
AHVSFKPTVAQQR	GHFQGVPVISKGQQKAHVSFKPTVAQQRKC	QKAHVSFKPTVAQQRKCPNCTETAVNGELV	K	A	H	Q	R	K	2	1	0	0	0	2	0	0	1	0	0	1	0	1	1	1	1	0	0	2	0	0	13	1	1467.79	G3X977;Q61703;F6SGM1	G3X977	251	263	Itih2	Inter-alpha-trypsin inhibitor heavy chain H2	yes	no	2;3;4	8.6088E-186	202.32	1	1	3	2	3
AHVTHHPR	LELGKEMLLRTDPPKAHVTHHPRSQGDVTL	LRTDPPKAHVTHHPRSQGDVTLRCWALGFY	K	A	H	P	R	S	1	1	0	0	0	0	0	0	3	0	0	0	0	0	1	0	1	0	0	1	0	0	8	0	953.494	E9PX63;O19441;V9GXI3	E9PX63	208	215	H2-Q1;H2-Bl		no	no	3	0.022327	60.436	2	2
AHYGGFTVQNEASK	ELLIEMEDWKGDKVKAHYGGFTVQNEASKY	KAHYGGFTVQNEASKYQVSVNKYKGTAGNA	K	A	H	S	K	Y	2	0	1	0	0	1	1	2	1	0	0	1	0	1	0	1	1	0	1	1	0	0	14	0	1507.71	Q8K0E8	Q8K0E8	344	357	Fgb	Fibrinogen beta chain;Fibrinopeptide B;Fibrinogen beta chain	yes	yes	2;3	1.5218E-05	149.33	2		2	2	3
AIAVTVQEMVTK	GSFVDYQTTMVRTAKAIAVTVQEMVTKSNT	TAKAIAVTVQEMVTKSNTSPEELGPLANQL	K	A	I	T	K	S	2	0	0	0	0	1	1	0	0	1	0	1	1	0	0	0	2	0	0	3	0	0	12	0	1288.71	P26039	P26039	1863	1874	Tln1	Talin-1	yes	yes	2	1.035E-11	132.91	1		2	2	1
AIEINPDSAQPYK	VKLQKPNAAIRDCDRAIEINPDSAQPYKWR	DRAIEINPDSAQPYKWRGKAHRLLGHWEEA	R	A	I	Y	K	W	2	0	1	1	0	1	1	0	0	2	0	1	0	0	2	1	0	0	1	0	0	0	13	0	1444.72	Q99L47;F8WJK8	Q99L47	173	185	St13	Hsc70-interacting protein	yes	no	2	0.024485	45.137					1
AIGEMDNQVTQLTTELK	SGEPGIPCECSQLRKAIGEMDNQVTQLTTE	GEMDNQVTQLTTELKFIKNALPSPAAVAGV	K	A	I	L	K	F	1	0	1	1	0	2	2	1	0	1	2	1	1	0	0	0	3	0	0	1	0	0	17	0	1889.94	A0A1Y7VKG6;A0A0R4J0M6;Q3SXB8	A0A1Y7VKG6	122	138	Colec11	Collectin-11	yes	no	2	0.042198	32.062	1
AIGSASEGAQSSLQEVYHK	FHMDPSGTFVQCDARAIGSASEGAQSSLQE	ASEGAQSSLQEVYHKSMTLKEAIKSSLIIL	R	A	I	H	K	S	3	0	0	0	0	2	2	2	1	1	1	1	0	0	0	4	0	0	1	1	0	0	19	0	1960.95	Q9Z2U1	Q9Z2U1	169	187	Psma5	Proteasome subunit alpha type-5	yes	yes	3	0.0011391	47.222	2	2	1	1	2
AIHSWLTR	IDEELLGDGHSYSPRAIHSWLTRAMYSRRS	GHSYSPRAIHSWLTRAMYSRRSKMNPLWNT	R	A	I	T	R	A	1	1	0	0	0	0	0	0	1	1	1	0	0	0	0	1	1	1	0	0	0	0	8	0	982.535	P99026	P99026	132	139	Psmb4	Proteasome subunit beta type-4	yes	yes	3	0.0068956	82.279	2	1	2	2	1
AIINLAVYGK	REIKEEIANYEDVAKAIINLAVYGKYQNRS	EDVAKAIINLAVYGKYQNRSYERLGLLVDT	K	A	I	G	K	Y	2	0	1	0	0	0	0	1	0	2	1	1	0	0	0	0	0	0	1	1	0	0	10	0	1060.63	Q9WVJ3;A0A2I3BS14;A0A2I3BPG0	Q9WVJ3	47	56	Cpq	Carboxypeptidase Q	yes	no	2	0.024099	57.047					1
AILESGSSNAPWAVK	SLHLLCPQSYPLFTRAILESGSSNAPWAVK	AILESGSSNAPWAVKHPEEARNRTLTLAKF	R	A	I	V	K	H	3	0	1	0	0	0	1	1	0	1	1	1	0	0	1	3	0	1	0	1	0	0	15	0	1528.79	Q03311	Q03311	249	263	Bche	Cholinesterase	yes	yes	2	3.5996E-13	125.72				1	2
AILTADK	PETGGTAYNQKFKGKAILTADKSSSTAYME	YNQKFKGKAILTADKSSSTAYMELRSLTSE	K	A	I	D	K	S	2	0	0	1	0	0	0	0	0	1	1	1	0	0	0	0	1	0	0	0	0	0	7	0	730.423	A0A0A6YXA5	A0A0A6YXA5	87	93	Ighv1-15		yes	yes	2	0.016248	97.068				1	1
AILVDLEPGTMDSVR	NVYYNEAAGNKYVPRAILVDLEPGTMDSVR	AILVDLEPGTMDSVRSGPFGQIFRPDNFVF	R	A	I	V	R	S	1	1	0	2	0	0	1	1	0	1	2	0	1	0	1	1	1	0	0	2	0	0	15	0	1614.83	P99024;A0A1D5RM76;Q7TMM9;Q9CWF2	Q7TMM9	63	77	Tubb5;Tubb2a;Tubb2b	Tubulin beta-5 chain;Tubulin beta-2A chain;Tubulin beta-2B chain	no	no	2;3	0.00039262	94.09			1	1
AINQGGLTSVAVR	FSPEGRLYQVEYAFKAINQGGLTSVAVRGK	FKAINQGGLTSVAVRGKDCAVIVTQKKVPD	K	A	I	V	R	G	2	1	1	0	0	1	0	2	0	1	1	0	0	0	0	1	1	0	0	2	0	0	13	0	1284.71	Q9QUM9;E0CXB1	Q9QUM9	31	43	Psma6	Proteasome subunit alpha type-6	yes	no	2	0.0068237	57.785				1
AINTFPYR	EFTLKEFNRVEDIIKAINTFPYRGGSTNTG	RVEDIIKAINTFPYRGGSTNTGKAMTYVRE	K	A	I	Y	R	G	1	1	1	0	0	0	0	0	0	1	0	0	0	1	1	0	1	0	1	0	0	0	8	0	980.508	E9PX70;Q60847	E9PX70	506	513	Col12a1	Collagen alpha-1(XII) chain	yes	no	2	0.023132	84.244				1
AINYLISGYQR	YLNETQQLTEAIKSKAINYLISGYQRQLNY	IKSKAINYLISGYQRQLNYQHSDGSYSTFG	K	A	I	Q	R	Q	1	1	1	0	0	1	0	1	0	2	1	0	0	0	0	1	0	0	2	0	0	0	11	0	1296.68	Q61838	Q61838	1016	1026	A2m	Alpha-2-macroglobulin;Alpha-2-macroglobulin 165 kDa subunit;Alpha-2-macroglobulin 35 kDa subunit	yes	yes	2;3	4.3927E-16	180.44	3	2	2	3	2
AIQEVATGIAFLGITDEATEGQFMYVTGGR	LQGTVAIPRNAEENKAIQEVATGIAFLGIT	DEATEGQFMYVTGGRLTYSNWKKDEPNNHG	K	A	I	G	R	L	4	1	0	1	0	2	3	5	0	3	1	0	1	2	0	0	4	0	1	2	0	0	30	0	3144.54	P39039	P39039	164	193	Mbl1	Mannose-binding protein A	yes	yes	3;4	7.339700000000001E-101	146.8	3	3	2	1	1
AIQIMYQNLQQDGLENVHLEQVR	DTVGPRLSGSKNLEKAIQIMYQNLQQDGLE	LQQDGLENVHLEQVRIPHWERGEESAVMLE	K	A	I	V	R	I	1	1	2	1	0	5	2	1	1	2	3	0	1	0	0	0	0	0	1	2	0	0	23	0	2738.38	Q9WVJ3;A0A2I3BS14;A0A2I3BPG0	Q9WVJ3	85	107	Cpq	Carboxypeptidase Q	yes	no	3	5.0767E-09	55.127	2	1	2	2	2
AIQVYYNPDQPPKPGMIDSATQK	FRAENRTTEAKELIKAIQVYYNPDQPPKPG	DQPPKPGMIDSATQKSKKMVEEIVKYEALL	K	A	I	Q	K	S	2	0	1	2	0	3	0	1	0	2	0	2	1	0	4	1	1	0	2	1	0	0	23	1	2560.26	Q3UER8;Q8VCM7	Q3UER8	88	110	Fgg	Fibrinogen gamma chain	yes	no	2;3	2.9457E-09	85.518	2	2	2	3	2
AISASEADAMTLDGGWVYDAGLTPNNLK	RLACVKKTSYPDCIKAISASEADAMTLDGG	GGWVYDAGLTPNNLKPVAAEFYGSVEHPQT	K	A	I	L	K	P	5	0	2	3	0	0	1	3	0	1	3	1	1	0	1	2	2	1	1	1	0	0	28	0	2879.36	Q921I1;D3YYR8;E9Q2Q7	Q921I1	70	97	Tf;Trf	Serotransferrin	yes	no	2;3	6.8224E-27	108.25		2	1	1	1
AITVFSPDGHLFQVEYAQEAVK	______________________________	DGHLFQVEYAQEAVKKGSTAVGVRGKDIVV	R	A	I	V	K	K	3	0	0	1	0	2	2	1	1	1	1	1	0	2	1	1	1	0	1	3	0	0	22	0	2448.23	Q9Z2U0;A0A338P7D7;Q9CWH6;B7ZMS4;A0A3Q4L361;A0A3Q4EHS3;A0A3Q4EG42	Q9Z2U0	6	27	Psma7;Psma8	Proteasome subunit alpha type-7;Proteasome subunit alpha type-7-like;Proteasome subunit alpha type	yes	no	3	3.722E-07	58.49	1			3
AIYDYANK	RLLGSLKSNVPKASKAIYDYANKYHLEYVS	NVPKASKAIYDYANKYHLEYVSSELRKSLQ	K	A	I	N	K	Y	2	0	1	1	0	0	0	0	0	1	0	1	0	0	0	0	0	0	2	0	0	0	8	0	956.46	E9Q414;E9Q1Y3	E9Q414	4045	4052	Apob	Apolipoprotein B-100;Apolipoprotein B-48	yes	no	2	0.0085841	128.48	2		2	2
AKFEELNMDLFR	ESFFEGEDFSETLTRAKFEELNMDLFRSTM	LTRAKFEELNMDLFRSTMKPVQKVLEDSDL	R	A	K	F	R	S	1	1	1	1	0	0	2	0	0	0	2	1	1	2	0	0	0	0	0	0	0	0	12	1	1511.74	P20029	P20029	326	337	Hspa5	78 kDa glucose-regulated protein	yes	yes	3	0.020704	34.96			2		1
AKGNEQSFHVSLR	MEQEGPEYWERETQRAKGNEQSFHVSLRTL	QRAKGNEQSFHVSLRTLLGYYNQSESGSHT	R	A	K	L	R	T	1	1	1	0	0	1	1	1	1	0	1	1	0	1	0	2	0	0	0	1	0	0	13	1	1471.75	P01898	P01898	91	103	H2-Q10	H-2 class I histocompatibility antigen, Q10 alpha chain	yes	yes	3;4	0.0025542	70.332	3		2	1
AKTSEIQSQAK	YFQSMTDYGKDLMEKAKTSEIQSQAKAYFE	LMEKAKTSEIQSQAKAYFEKTHEQLTPLVR	K	A	K	A	K	A	2	0	0	0	0	2	1	0	0	1	0	2	0	0	0	2	1	0	0	0	0	0	11	1	1189.63	P09813	P09813	52	62	Apoa2	Apolipoprotein A-II;Proapolipoprotein A-II	yes	yes	3	0.022236	38.402					1
ALASQLQDSLK	ADLAARGEGESPQARALASQLQDSLKDLKA	PQARALASQLQDSLKDLKAQMQEAMTQEVS	R	A	L	L	K	D	2	0	0	1	0	2	0	0	0	0	3	1	0	0	0	2	0	0	0	0	0	0	11	0	1172.64	Q64727	Q64727	571	581	Vcl	Vinculin	yes	yes	2	0.00084535	94.309			1		2
ALAVNPR	KTMLESAGGLIQTARALAVNPRDPPRWSVL	GGLIQTARALAVNPRDPPRWSVLAGHSRTV	R	A	L	P	R	D	2	1	1	0	0	0	0	0	0	0	1	0	0	0	1	0	0	0	0	1	0	0	7	0	739.434	P26039	P26039	1619	1625	Tln1	Talin-1	yes	yes	2	0.033591	97.64			1	1	1
ALDEFTIIQDPQPQYQFR	KLHYTTETIKCPQPKALDEFTIIQDPQPQY	EFTIIQDPQPQYQFRDYFIVTCKQGYQLME	K	A	L	F	R	D	1	1	0	2	0	4	1	0	0	2	1	0	0	2	2	0	1	0	1	0	0	0	18	0	2208.09	Q8CG16;Q8CFG9	Q8CG16	313	330	C1ra;C1rb	Complement C1r-A subcomponent;Complement C1r-A subcomponent heavy chain;Complement C1r-A subcomponent light chain;Complement C1r-B subcomponent;Complement C1r-B subcomponent heavy chain;Complement C1r-B subcomponent light chain	yes	no	2;3	6.572000000000001E-25	174.42	4	2	2	4	4
ALDFAVSEYNK	GAPEEADANEEGVRRALDFAVSEYNKGSND	GVRRALDFAVSEYNKGSNDAYHSRAIQVVR	R	A	L	N	K	G	2	0	1	1	0	0	1	0	0	0	1	1	0	1	0	1	0	0	1	1	0	0	11	0	1255.61	A2APX3;P21460	A2APX3	46	56	Cst3	Cystatin-C	yes	no	2	0.0049245	75.378	1	1	2	2
ALDGDFTEENR	KEVANSTANLVKTIKALDGDFTEENRAQCR	KTIKALDGDFTEENRAQCRAATAPLLEAVD	K	A	L	N	R	A	1	1	1	2	0	0	2	1	0	0	1	0	0	1	0	0	1	0	0	0	0	0	11	0	1265.55	P26039	P26039	1545	1555	Tln1	Talin-1	yes	yes	2	0.0055202	73.233		1		2	3
ALEEFQSEVSSCR	TDFAYSSTVKQNLKKALEEFQSEVSSCRCA	KKALEEFQSEVSSCRCAPCRGNGVPVLKGS	K	A	L	C	R	C	1	1	0	0	1	1	3	0	0	0	1	0	0	1	0	3	0	0	0	1	0	0	13	0	1483.66	Q8BH35	Q8BH35	491	503	C8b	Complement component C8 beta chain	yes	yes	2	0.00074094	74.944			1
ALELDSNLYR	KGFMDGKQACVLMIKALELDSNLYRIGQSK	VLMIKALELDSNLYRIGQSKVFFRAGVLAH	K	A	L	Y	R	I	1	1	1	1	0	0	1	0	0	0	3	0	0	0	0	1	0	0	1	0	0	0	10	0	1192.61	Q8VDD5	Q8VDD5	746	755	Myh9	Myosin-9	yes	yes	2	0.0064982	82.452			1
ALETSSA	YMDWILEKTQSSDVRALETSSA________	KTQSSDVRALETSSA_______________	R	A	L	S	A	-	2	0	0	0	0	0	1	0	0	0	1	0	0	0	0	2	1	0	0	0	0	0	7	0	677.323	P26262	P26262	632	638	Klkb1	Plasma kallikrein;Plasma kallikrein heavy chain;Plasma kallikrein light chain	yes	yes	1	0.031538	118.42			1
ALEWLGFIR	FTDYYMSWVRQPPGKALEWLGFIRNKANGY	RQPPGKALEWLGFIRNKANGYTTEYSASVK	K	A	L	I	R	N	1	1	0	0	0	0	1	1	0	1	2	0	0	1	0	0	0	1	0	0	0	0	9	0	1103.61	A0A075B5R2;A0A075B5R3;A0A0A6YX91;P01786	A0A075B5R2	63	71	Ighv7-3;Ighv7-2	Ig heavy chain V region MOPC 47A	yes	no	2	3.1252E-11	144.83	2	1	2	1
ALFVSEQGK	CKQHKEQLLPVKDVKALFVSEQGKSLTRKE	PVKDVKALFVSEQGKSLTRKEVYIKNGDKK	K	A	L	G	K	S	1	0	0	0	0	1	1	1	0	0	1	1	0	1	0	1	0	0	0	1	0	0	9	0	977.518	B8JJN0;F6VQX8;B8JJM5;P04186;F6XQ00;B8JJM6;H3BK95;F6W2T4;B8JJM3	B8JJN0	1142	1150	Gm20547;Cfb	Complement factor B;Complement factor B Ba fragment;Complement factor B Bb fragment	yes	no	2	0.00078736	112.37	1	1		2	1
ALGDLISATK	ETQVVLINAVKDVAKALGDLISATKAAAGK	KDVAKALGDLISATKAAAGKVGDDPAVWQL	K	A	L	T	K	A	2	0	0	1	0	0	0	1	0	1	2	1	0	0	0	1	1	0	0	0	0	0	10	0	987.56	P26039	P26039	2090	2099	Tln1	Talin-1	yes	yes	2	0.00097357	115.71	1	1	1	2	2
ALGLDEGEPAGSWDLTVEGR	EQLICPVNPGHLSFRALGLDEGEPAGSWDL	EGEPAGSWDLTVEGRAAHSQCAYSNPEGTV	R	A	L	G	R	A	2	1	0	2	0	0	3	4	0	0	3	0	0	0	1	1	1	1	0	1	0	0	20	0	2070.99	Q9DBB9	Q9DBB9	456	475	Cpn2	Carboxypeptidase N subunit 2	yes	yes	2;3	9.826699999999999E-93	202.13	3	3	2	3	2
ALIYLASNR	TAVAWYQQKPGQSPKALIYLASNRHTGVPD	PGQSPKALIYLASNRHTGVPDRFTGSGSGT	K	A	L	N	R	H	2	1	1	0	0	0	0	0	0	1	2	0	0	0	0	1	0	0	1	0	0	0	9	0	1019.58	A0A140T8P1	A0A140T8P1	66	74			yes	yes	2	0.0041706	98.997				2	1
ALIYSASYR	TNVAWYQQKPGQSPKALIYSASYRYSGVPD	PGQSPKALIYSASYRYSGVPDRFTGSGSGT	K	A	L	Y	R	Y	2	1	0	0	0	0	0	0	0	1	1	0	0	0	0	2	0	0	2	0	0	0	9	0	1042.54	A0A140T8M5	A0A140T8M5	66	74			yes	yes	2	0.00034956	121.99				1	1
ALLAYAFALAGNK	WASISQSQESHVYTKALLAYAFALAGNKAK	TKALLAYAFALAGNKAKRSELLESLNKDAV	K	A	L	N	K	A	5	0	1	0	0	0	0	1	0	0	3	1	0	1	0	0	0	0	1	0	0	0	13	0	1321.74	Q61838	Q61838	1160	1172	A2m	Alpha-2-macroglobulin;Alpha-2-macroglobulin 165 kDa subunit;Alpha-2-macroglobulin 35 kDa subunit	yes	yes	2;3	8.9317E-05	122.13	1	1	3
ALLDIGR	HNMGGNPVTVIQDIRALLDIGRDPKNPRED	VTVIQDIRALLDIGRDPKNPREDYLDVYVF	R	A	L	G	R	D	1	1	0	1	0	0	0	1	0	1	2	0	0	0	0	0	0	0	0	0	0	0	7	0	756.449	B8JJN0;F6VQX8;B8JJM5;P04186;F6XQ00;B8JJM6;H3BK95	B8JJN0	919	925	Gm20547;Cfb	Complement factor B;Complement factor B Ba fragment;Complement factor B Bb fragment	yes	no	2	0.0099007	114.54	2		2	1	2
ALLDIGRDPK	HNMGGNPVTVIQDIRALLDIGRDPKNPRED	IQDIRALLDIGRDPKNPREDYLDVYVFGVG	R	A	L	P	K	N	1	1	0	2	0	0	0	1	0	1	2	1	0	0	1	0	0	0	0	0	0	0	10	1	1096.62	B8JJN0;F6VQX8;B8JJM5;P04186;F6XQ00;B8JJM6;H3BK95	B8JJN0	919	928	Gm20547;Cfb	Complement factor B;Complement factor B Ba fragment;Complement factor B Bb fragment	yes	no	3	0.0054839	74.376	1	2	2	2	2
ALLEVVQSGGK	DAIETDDLTIKLVIKALLEVVQSGGKNIEL	LVIKALLEVVQSGGKNIELAVMRRDQPLKI	K	A	L	G	K	N	1	0	0	0	0	1	1	2	0	0	2	1	0	0	0	1	0	0	0	2	0	0	11	0	1099.62	Q9Z2U0;A0A338P7D7;Q9CWH6	Q9Z2U0	194	204	Psma7;Psma8	Proteasome subunit alpha type-7;Proteasome subunit alpha type-7-like	yes	no	2	0.01187	61.56		2		1
ALLLQGSNEIELR	NSVAYMDQQTGNLKKALLLQGSNEIELRGE	KKALLLQGSNEIELRGEGNSRFTYSTLVDG	K	A	L	L	R	G	1	1	1	0	0	1	2	1	0	1	4	0	0	0	0	1	0	0	0	0	0	0	13	0	1454.81	P11087	P11087	1376	1388	Col1a1	Collagen alpha-1(I) chain	yes	yes	2	2.6962E-05	125.75	2	1	2
ALMAYAFALAGNQDK	KTIEQGRNANFVYTKALMAYAFALAGNQDK	ALMAYAFALAGNQDKRNEILKSLDEEAIKE	K	A	L	D	K	R	5	0	1	1	0	1	0	1	0	0	2	1	1	1	0	0	0	0	1	0	0	0	15	0	1582.78	P28666	P28666	1125	1139	Mug2	Murinoglobulin-2	yes	yes	2	0.028527	54.471		1	1
ALMAYAFALAGNQDKR	KTIEQGRNANFVYTKALMAYAFALAGNQDK	LMAYAFALAGNQDKRNEILKSLDEEAIKED	K	A	L	K	R	N	5	1	1	1	0	1	0	1	0	0	2	1	1	1	0	0	0	0	1	0	0	0	16	1	1738.88	P28666	P28666	1125	1140	Mug2	Murinoglobulin-2	yes	yes	3	0.00099658	60.918		1	1
ALMAYAFALAGNQNK	KTIEQERNASFVYTKALMAYAFALAGNQNK	ALMAYAFALAGNQNKRDEILKSLDEEAIKE	K	A	L	N	K	R	5	0	2	0	0	1	0	1	0	0	2	1	1	1	0	0	0	0	1	0	0	0	15	0	1581.8	P28665	P28665	1150	1164	Mug1	Murinoglobulin-1	yes	yes	2;3	4.2167E-55	166.07	2	2	3	2	2
ALMAYAFALAGNQNKR	KTIEQERNASFVYTKALMAYAFALAGNQNK	LMAYAFALAGNQNKRDEILKSLDEEAIKEN	K	A	L	K	R	D	5	1	2	0	0	1	0	1	0	0	2	1	1	1	0	0	0	0	1	0	0	0	16	1	1737.9	P28665	P28665	1150	1165	Mug1	Murinoglobulin-1	yes	yes	3	0.00081704	71.879			2
ALNPTVFK	VVPVFPKHQLKDVEKALNPTVFKAIMKKLE	QLKDVEKALNPTVFKAIMKKLELSKFLPTY	K	A	L	F	K	A	1	0	1	0	0	0	0	0	0	0	1	1	0	1	1	0	1	0	0	1	0	0	8	0	888.507	P97290	P97290	377	384	Serping1	Plasma protease C1 inhibitor	yes	yes	2	0.030635	69.176	1
ALPAPIER	DWMRGKEFKCKVNNKALPAPIERTISKPKG	KCKVNNKALPAPIERTISKPKGRAQTPQVY	K	A	L	E	R	T	2	1	0	0	0	0	1	0	0	1	1	0	0	0	2	0	0	0	0	0	0	0	8	0	865.502	A0A075B5P5;A0A1Y7VJN6;P03987	A0A075B5P5	210	217	Ighg3	Ig gamma-3 chain C region	yes	no	2	0.0049419	111.04	2	1	2	1
ALPSPIEK	DWMSGKEFKCKVNNRALPSPIEKTISKPRG	KCKVNNRALPSPIEKTISKPRGPVRAPQVY	R	A	L	E	K	T	1	0	0	0	0	0	1	0	0	1	1	1	0	0	2	1	0	0	0	0	0	0	8	0	853.491	F6TQW2;A0A0A6YY53;P01864	F6TQW2	215	222	Ighg2c	Ig gamma-2A chain C region secreted form	yes	no	2	0.0087271	104.45				1
ALQEGNFQTPVFIVPLTDLR	QTFLWTMPAFEVSLRALQEGNFQTPVFIVP	NFQTPVFIVPLTDLRIPSIRINFKMLKNIK	R	A	L	L	R	I	1	1	1	1	0	2	1	1	0	1	3	0	0	2	2	0	2	0	0	2	0	0	20	0	2257.21	E9Q414;E9Q1Y3	E9Q414	2600	2619	Apob	Apolipoprotein B-100;Apolipoprotein B-48	yes	no	2;3	2.3946E-93	167.32	4	2	4	2	4
ALQQIFEHMLDVSK	KKDGERHAFILQDAKALQQIFEHMLDVSKL	KALQQIFEHMLDVSKLTDTICGVGNMSANA	K	A	L	S	K	L	1	0	0	1	0	2	1	0	1	1	2	1	1	1	0	1	0	0	0	1	0	0	14	0	1657.85	B8JJN0;P21180;B8JJN2;B8JJM9	B8JJN0	298	311	Gm20547;C2	Complement C2;Complement C2b fragment;Complement C2a fragment	no	no	3	0.00029424	70.963	2	2	2	1
ALREEYFDPSMVGWTVK	QEGSYKLQQVHQYMKALREEYFDPSMVGWT	REEYFDPSMVGWTVKYYEIEENMVELIKTL	K	A	L	V	K	Y	1	1	0	1	0	0	2	1	0	0	1	1	1	1	1	1	1	1	1	2	0	0	17	1	2026.98	E9Q414;E9Q1Y3	E9Q414	4323	4339	Apob	Apolipoprotein B-100;Apolipoprotein B-48	yes	no	3	0.00051951	86.479	2	2	2	2
ALSAILDIEHGDPK	VRKEQVQQRAIECSRALSAILDIEHGDPKE	RALSAILDIEHGDPKENVLGSAFDMKQLKD	R	A	L	P	K	E	2	0	0	2	0	0	1	1	1	2	2	1	0	0	1	1	0	0	0	0	0	0	14	0	1477.78	Q60963;E9Q330	Q60963	231	244	Pla2g7	Platelet-activating factor acetylhydrolase	yes	no	3	0.0025696	40.552				1	2
ALSCLESSWK	LLESSLPATHPVVSKALSCLESSWKTIEQE	PVVSKALSCLESSWKTIEQERNASFVYTKA	K	A	L	W	K	T	1	0	0	0	1	0	1	0	0	0	2	1	0	0	0	3	0	1	0	0	0	0	10	0	1122.54	P28665;P28666	P28665	1126	1135	Mug1;Mug2	Murinoglobulin-1;Murinoglobulin-2	no	no	2	0.023023	57.708			1
ALSFYQPR	DSLHWQRPGDVQKVKALSFYQPRAPSAEVE	GDVQKVKALSFYQPRAPSAEVEMTAYVLLA	K	A	L	P	R	A	1	1	0	0	0	1	0	0	0	0	1	0	0	1	1	1	0	0	1	0	0	0	8	0	980.508	Q61838	Q61838	1206	1213	A2m	Alpha-2-macroglobulin;Alpha-2-macroglobulin 165 kDa subunit;Alpha-2-macroglobulin 35 kDa subunit	yes	yes	2;3	0.011343	107.32	1	1		2	2
ALSSQHQAR	RAVQKLRREVEKAKRALSSQHQARIEIESF	VEKAKRALSSQHQARIEIESFFEGEDFSET	R	A	L	A	R	I	2	1	0	0	0	2	0	0	1	0	1	0	0	0	0	2	0	0	0	0	0	0	9	0	996.51	P20029	P20029	299	307	Hspa5	78 kDa glucose-regulated protein	yes	yes	3	0.0041037	77.732				2	1
ALSTDPASPNLK	KGISMSSSKLLLAAKALSTDPASPNLKSQL	AAKALSTDPASPNLKSQLAAAARAVTDSIN	K	A	L	L	K	S	2	0	1	1	0	0	0	0	0	0	2	1	0	0	2	2	1	0	0	0	0	0	12	0	1212.63	P26039	P26039	1321	1332	Tln1	Talin-1	yes	yes	2	6.7726E-05	118.18		1			2
ALSVAELTQQMFDAR	PGFAPLTAQGSQQYRALSVAELTQQMFDAR	ALSVAELTQQMFDARNIMAACDPRRGRYLT	R	A	L	A	R	N	3	1	0	1	0	2	1	0	0	0	2	0	1	1	0	1	1	0	0	1	0	0	15	0	1678.83	A2AQ07	A2AQ07	283	297	Tubb1	Tubulin beta-1 chain	yes	yes	2;3	7.1938E-180	214.26	2	3	1	2	2
ALTQDDGVAK	PASKVLVVTQGSNAKALTQDDGVAKLSINT	GSNAKALTQDDGVAKLSINTPNSRQPLTIT	K	A	L	A	K	L	2	0	0	2	0	1	0	1	0	0	1	1	0	0	0	0	1	0	0	1	0	0	10	0	1016.51	P01027	P01027	399	408	C3	Complement C3;Complement C3 beta chain;C3-beta-c;Complement C3 alpha chain;C3a anaphylatoxin;Acylation stimulating protein;Complement C3b alpha chain;Complement C3c alpha chain fragment 1;Complement C3dg fragment;Complement C3g fragment;Complement C3d fragment;Complement C3f fragment;Complement C3c alpha chain fragment 2	yes	yes	1;2	3.0618E-07	135.83	7	8	6	5	4
ALTQTGGPHVK	GVFREATTEFSVDARALTQTGGPHVKARVA	VDARALTQTGGPHVKARVANPSGNLTDTYV	R	A	L	V	K	A	1	0	0	0	0	1	0	2	1	0	1	1	0	0	1	0	2	0	0	1	0	0	11	0	1107.6	B7FAV1;B7FAU9;Q8BTM8	B7FAV1	1260	1270	Flna	Filamin-A	yes	no	3	0.0037193	47.894					1
ALTVPELTQQMFDAK	PGFAPLTSRGSQQYRALTVPELTQQMFDAK	ALTVPELTQQMFDAKNMMAACDPRHGRYLT	R	A	L	A	K	N	2	0	0	1	0	2	1	0	0	0	2	1	1	1	1	0	2	0	0	1	0	0	15	0	1690.86	P68372;Q922F4	P68372	283	297	Tubb4b;Tubb6	Tubulin beta-4B chain;Tubulin beta-6 chain	no	no	3	0.0014513	38.337		1
ALTVPELTQQMFDSK	PGFAPLTSRGSQQYRALTVPELTQQMFDSK	ALTVPELTQQMFDSKNMMAACDPRHGRYLT	R	A	L	S	K	N	1	0	0	1	0	2	1	0	0	0	2	1	1	1	1	1	2	0	0	1	0	0	15	0	1706.85	Q7TMM9;Q9CWF2	Q7TMM9	283	297	Tubb2a;Tubb2b	Tubulin beta-2A chain;Tubulin beta-2B chain	yes	no	2	0.0065065	51.092			1	1
ALVALGAVDMALYAVGGR	RNADMMKLRIQTDSKALVALGAVDMALYAV	ALGAVDMALYAVGGRSHKPLDMSKVFEVIN	K	A	L	G	R	S	5	1	0	1	0	0	0	3	0	0	3	0	1	0	0	0	0	0	1	3	0	0	18	0	1745.95	P01029	P01029	595	612	C4b	Complement C4-B;Complement C4 beta chain;Complement C4 alpha chain;C4a anaphylatoxin;Complement C4 gamma chain	yes	yes	2;3	2.0623000000000003E-25	164.13	4	4	2	4	6
ALVEGVDQLLTDYQIK	ISLPTGIGANEEDLRALVEGVDQLLTDYQI	LVEGVDQLLTDYQIKDGHVILQLNSIPSRD	R	A	L	I	K	D	1	0	0	2	0	2	1	1	0	1	3	1	0	0	0	0	1	0	1	2	0	0	16	0	1803.96	P06684	P06684	1445	1460	C5	Complement C5;Complement C5 beta chain;Complement C5 alpha chain;C5a anaphylatoxin;Complement C5 alpha chain	yes	yes	2;3	1.086E-43	189.33	2	4	3	4	4
ALVHLPLEYNSAVYSR	TMKATDLQLSDVFLKALVHLPLEYNSAVYS	LVHLPLEYNSAVYSRIFDDFGTHYFTSGSL	K	A	L	S	R	I	2	1	1	0	0	0	1	0	1	0	3	0	0	0	1	2	0	0	2	2	0	0	16	0	1830.96	E9Q6D8;Q91X70	E9Q6D8	341	356	C6		yes	no	3	0.00021828	78.505			2
ALVNAQVDFQAMWYSDQNHGISSGR	ADDNVHFQNSAQIAKALVNAQVDFQAMWYS	AMWYSDQNHGISSGRSQNHLYTHMTHFLKQ	K	A	L	G	R	S	3	1	2	2	0	3	0	2	1	1	1	0	1	1	0	3	0	1	1	2	0	0	25	0	2793.29	G3UXR2;P97321	G3UXR2	691	715	Fap	Prolyl endopeptidase FAP;Antiplasmin-cleaving enzyme FAP, soluble form	yes	no	3	2.9626E-05	42.041	1		1
ALVQQLEQFR	EFRRTVEPMGEMFNKALVQQLEQFRQQLGP	EMFNKALVQQLEQFRQQLGPNSGEVESHLS	K	A	L	F	R	Q	1	1	0	0	0	3	1	0	0	0	2	0	0	1	0	0	0	0	0	1	0	0	10	0	1230.67	P06728	P06728	317	326	Apoa4	Apolipoprotein A-IV	yes	yes	2	3.1785E-179	222.19	2	2	2	2	2
ALVSSVR	KESCLTPKLDGVKEKALVSSVRQRMKCSSM	KLDGVKEKALVSSVRQRMKCSSMQKFGERA	K	A	L	V	R	Q	1	1	0	0	0	0	0	0	0	0	1	0	0	0	0	2	0	0	0	2	0	0	7	0	730.434	P07724	P07724	213	219	Alb	Serum albumin	yes	yes	2	0.0043508	132.72	1	2	2	2	1
ALYFEYTDGTFSK	YLQNGPDRIGRKYKKALYFEYTDGTFSKTI	KKALYFEYTDGTFSKTIDKPAWLGFLGPVI	K	A	L	S	K	T	1	0	0	1	0	0	1	1	0	0	1	1	0	2	0	1	2	0	2	0	0	0	13	0	1540.71	G3X9T8;G3X8Q5	G3X9T8	70	82	Cp		no	no	2	3.765E-05	115.78	1	3	3	4	5
ALYLSDNDFEILPPDIGK	EHSLPGNFFYLTTLRALYLSDNDFEILPPD	LSDNDFEILPPDIGKLTKLQILSLRDNDLI	R	A	L	G	K	L	1	0	1	3	0	0	1	1	0	2	3	1	0	1	2	1	0	0	1	0	0	0	18	0	2019.02	A2AUR7;Q9D031;Q01730	A2AUR7	121	138	Rsu1	Ras suppressor protein 1	yes	no	3	0.031525	24.041		1
ALYQTEAFTADFQQPTEAK	EKDLQILAEFHEKTRALYQTEAFTADFQQP	TEAFTADFQQPTEAKNLINDYVSNQTQGMI	R	A	L	A	K	N	4	0	0	1	0	3	2	0	0	0	1	1	0	2	1	0	3	0	1	0	0	0	19	0	2158.02	A0A0R4J0I1;P07759	P07759	158	176	Serpina3k	Serine protease inhibitor A3K	no	no	2;3	0	289.72	5	4	3	3	4
ALYWVNGR	ALFGKQGFFPDSVNKALYWVNGRVPDGVSK	FPDSVNKALYWVNGRVPDGVSKVLVDHFGY	K	A	L	G	R	V	1	1	1	0	0	0	0	1	0	0	1	0	0	0	0	0	0	1	1	1	0	0	8	0	977.508	E9Q414;E9Q1Y3;CON__ENSEMBL:ENSBTAP00000032840	E9Q414	718	725	Apob	Apolipoprotein B-100;Apolipoprotein B-48	yes	no	2	1.3423E-12	137.44	2	2	2	2	2
ALYYDLITNPDIHSTYK	LSLGAEHRTESVIHRALYYDLITNPDIHST	YYDLITNPDIHSTYKELLASVTAPEKNLKS	R	A	L	Y	K	E	1	0	1	2	0	0	0	0	1	2	2	1	0	0	1	1	2	0	3	0	0	0	17	0	2026	P97298;B7ZC25;E9PWS2;F6S1M4	P97298	106	122	Serpinf1	Pigment epithelium-derived factor	yes	no	3	0.0046133	65.716	1	2
AMADPEVQQIMSDPAMR	AQYNRHDSPEDVKRRAMADPEVQQIMSDPA	ADPEVQQIMSDPAMRLILEQMQKDPQALSE	R	A	M	M	R	L	3	1	0	2	0	2	1	0	0	1	0	0	3	0	2	1	0	0	0	1	0	0	17	0	1888.85	Q60864	Q60864	489	505	Stip1	Stress-induced-phosphoprotein 1	yes	yes	2	0.010553	42.556					2
AMFHINKPR	CKPRMFYESVYGQCKAMFHINKPRRVLYLP	VYGQCKAMFHINKPRRVLYLPAYNCTLRPV	K	A	M	P	R	R	1	1	1	0	0	0	0	0	1	1	0	1	1	1	1	0	0	0	0	0	0	0	9	1	1112.59	Q9QXC1;Q6YJU1;A0A338P7B8	Q9QXC1	122	130	Fetub	Fetuin-B	yes	no	3	8.7846E-05	103.74	2	1	2	1
AMGIMNSFVNDIFER	KVLKQVHPDTGISSKAMGIMNSFVNDIFER	AMGIMNSFVNDIFERIASEASRLAHYNKRS	K	A	M	E	R	I	1	1	2	1	0	0	1	1	0	2	0	0	2	2	0	1	0	0	0	1	0	0	15	0	1742.81	Q8CBB6;Q8CGP2;Q8CGP1;Q64475;P10853;Q9D2U9;Q8CGP0;Q6ZWY9;Q64525;Q64478;P10854;Q64524	Q8CBB6	59	73	Hist1h2br;Hist1h2bp;Hist1h2bk;Hist1h2bb;Hist1h2bf;Hist3h2ba;Hist3h2bb;Hist1h2bc;Hist2h2bb;Hist1h2bh;Hist1h2bm;Hist2h2be	Histone H2B;Histone H2B type 1-P;Histone H2B type 1-K;Histone H2B type 1-B;Histone H2B type 1-F/J/L;Histone H2B type 3-A;Histone H2B type 3-B;Histone H2B type 1-C/E/G;Histone H2B type 2-B;Histone H2B type 1-H;Histone H2B type 1-M;Histone H2B type 2-E	yes	no	2	5.5166999999999996E-36	147.37				2	1
AMGVPMMGLDYSDEINQVVEVR	QALAVAASGPGSSFRAMGVPMMGLDYSDEI	GLDYSDEINQVVEVRETVRKYFPETWIWDL	R	A	M	V	R	E	1	1	1	2	0	1	2	2	0	1	1	0	3	0	1	1	0	0	1	4	0	0	22	0	2452.14	Q61838	Q61838	719	740	A2m	Alpha-2-macroglobulin;Alpha-2-macroglobulin 165 kDa subunit;Alpha-2-macroglobulin 35 kDa subunit	yes	yes	2;3;4	8.3822E-110	171.68	6	7	5	6	7
AMNQWVSGPAYYVEYLIK	SKSPSKKYELVKVTKAMNQWVSGPAYYVEY	QWVSGPAYYVEYLIKEAPCTKSQASCSLQH	K	A	M	I	K	E	2	0	1	0	0	1	1	1	0	1	1	1	1	0	1	1	0	1	3	2	0	0	18	0	2131.04	Q9QXC1;Q6YJU1;A0A338P7B8	Q9QXC1	196	213	Fetub	Fetuin-B	yes	no	3	3.1663E-05	94.882	2		2
AMQGGLVGSDETVALTAFVVIALHHGLDVFQDDDAK	LGDGSFHDPCPVIHRAMQGGLVGSDETVAL	ALHHGLDVFQDDDAKQLKNRVEASITKANS	R	A	M	A	K	Q	5	0	0	5	0	2	1	4	2	1	4	1	1	2	0	1	2	0	0	5	0	0	36	0	3738.86	P01029	P01029	1123	1158	C4b	Complement C4-B;Complement C4 beta chain;Complement C4 alpha chain;C4a anaphylatoxin;Complement C4 gamma chain	yes	yes	4	1.4948000000000002E-35	71.904	2	2
ANDYTTEYSASVK	APGKGLEWIAASRNKANDYTTEYSASVKGR	NKANDYTTEYSASVKGRFIVSRDTSQSILY	K	A	N	V	K	G	2	0	1	1	0	0	1	0	0	0	0	1	0	0	0	2	2	0	2	1	0	0	13	0	1447.65	A0A075B5S2;P01790;P01794;P01791;P01788;P01787	A0A075B5S2	74	86	Ighv7-1	Ig heavy chain V region M511;Ig heavy chain V region HPCG14;Ig heavy chain V region HPCM6;Ig heavy chain V region H8;Ig heavy chain V regions TEPC 15/S107/HPCM1/HPCM2/HPCM3	yes	no	2;3	1.9497999999999999E-19	135.99	2	3	2	2	2
ANGTPITQGVDTSNPTK	LISNFSPSGVTVAWKANGTPITQGVDTSNP	GTPITQGVDTSNPTKEGNKFMASSFLHLTS	K	A	N	T	K	E	1	0	2	1	0	1	0	2	0	1	0	1	0	0	2	1	4	0	0	1	0	0	17	0	1699.84	Q99JC1;P01844;A0A0G2JGQ8;P01845	Q99JC1	44	60	Iglc2;Iglc3	Ig lambda-2 chain C region;Ig lambda-3 chain C region	no	no	2	0.00038185	96.23	1		2
ANGTPITQGVDTSNPTKEDNK	LISNFSPSGVTVAWKANGTPITQGVDTSNP	TQGVDTSNPTKEDNKYMASSFLHLTSDQWR	K	A	N	N	K	Y	1	0	3	2	0	1	1	2	0	1	0	2	0	0	2	1	4	0	0	1	0	0	21	1	2186.05	A0A0G2JGQ8;P01845	A0A0G2JGQ8	44	64	Iglc3	Ig lambda-3 chain C region	yes	no	3	0.003362	37.552	1				2
ANGYTTEYSASVK	PPGKALEWLGFIRNKANGYTTEYSASVKGR	NKANGYTTEYSASVKGRFTISRDNSQSILY	K	A	N	V	K	G	2	0	1	0	0	0	1	1	0	0	0	1	0	0	0	2	2	0	2	1	0	0	13	0	1389.64	A0A075B5R2	A0A075B5R2	74	86	Ighv7-3		yes	yes	2	0.001031	90.05	1	2	2	1	1
ANLMHNLGGEEVSVACK	AKCNLLAEKQHGFCKANLMHNLGGEEVSVA	LMHNLGGEEVSVACKLFQTQPQPANANAVG	K	A	N	C	K	L	2	0	2	0	1	0	2	2	1	0	2	1	1	0	0	1	0	0	0	2	0	0	17	0	1770.84	P29699;A0A338P703;A0A338P7G1;A0A338P7H5	P29699	232	248	Ahsg	Alpha-2-HS-glycoprotein	yes	no	3	1.2274E-05	83.418	2	1	2	2	1
ANLPQSFQVDTSK	KVKCSGPGLSPGMVRANLPQSFQVDTSKAG	VRANLPQSFQVDTSKAGVAPLQVKVQGPKG	R	A	N	S	K	A	1	0	1	1	0	2	0	0	0	0	1	1	0	1	1	2	1	0	0	1	0	0	13	0	1433.72	B7FAV1;B7FAU9;Q8BTM8	B7FAV1	1441	1453	Flna	Filamin-A	yes	no	2	3.4658E-14	132.25			2		2
ANLQIDQINTDLNLER	EEQGNTELINDRLKKANLQIDQINTDLNLE	NLQIDQINTDLNLERSHAQKNENARQQLER	K	A	N	E	R	S	1	1	3	2	0	2	1	0	0	2	3	0	0	0	0	0	1	0	0	0	0	0	16	0	1868.96	Q8VDD5;A0A2R8W6V7	Q8VDD5	1755	1770	Myh9	Myosin-9	yes	no	2;3	0.00057556	121.02	2	2	1	1	3
ANNHATYYAESVK	SPEKGLEWVAEIRNKANNHATYYAESVKGR	NKANNHATYYAESVKGRFTISRDDSKSSVY	K	A	N	V	K	G	3	0	2	0	0	0	1	0	1	0	0	1	0	0	0	1	1	0	2	1	0	0	13	0	1466.68	A0A075B5T3	A0A075B5T3	74	86	Ighv6-6		yes	yes	3	0.00010941	68.83	2	2	2	1	2
ANRPFLVLIR	VITGRSLNPNRVTFKANRPFLVLIREVALN	RVTFKANRPFLVLIREVALNTIIFMGRVAN	K	A	N	I	R	E	1	2	1	0	0	0	0	0	0	1	2	0	0	1	1	0	0	0	0	1	0	0	10	1	1197.73	P32261	P32261	437	446	Serpinc1	Antithrombin-III	yes	yes	3	1.2377E-05	128.6	2	2	2
ANSFLGQK	DAKQLKNRVEASITKANSFLGQKASAGLLG	VEASITKANSFLGQKASAGLLGAHAAAITA	K	A	N	Q	K	A	1	0	1	0	0	1	0	1	0	0	1	1	0	1	0	1	0	0	0	0	0	0	8	0	863.45	P01029	P01029	1171	1178	C4b	Complement C4-B;Complement C4 beta chain;Complement C4 alpha chain;C4a anaphylatoxin;Complement C4 gamma chain	yes	yes	2	4.3019E-59	176.65				2	1
ANTMSSVYAESFR	AQLQSGGRAEYSPCRANTMSSVYAESFRGD	CRANTMSSVYAESFRGDKRYCEAGFSLAVT	R	A	N	F	R	G	2	1	1	0	0	0	1	0	0	0	0	0	1	1	0	3	1	0	1	1	0	0	13	0	1461.66	Q9QUM0	Q9QUM0	179	191	Itga2b	Integrin alpha-IIb;Integrin alpha-IIb heavy chain;Integrin alpha-IIb light chain	yes	yes	2	0.0027851	64.439	1	1	2		2
ANVGFLPPFPTLDPEEK	KAGFPRRLCFFYNKKANVGFLPPFPTLDPE	VGFLPPFPTLDPEEKCQAYKNNSESFLHLY	K	A	N	E	K	C	1	0	1	1	0	0	2	1	0	0	2	1	0	2	4	0	1	0	0	1	0	0	17	0	1869.95	O89020	O89020	131	147	Afm	Afamin	yes	yes	2;3	3.4488E-13	135.6	2		4	1	1
APDTPLLQGIADYKPQDGETIELR	LGKDAGDREYWQLLRAPDTPLLQGIADYKP	IADYKPQDGETIELRLVRW___________	R	A	P	L	R	L	2	1	0	3	0	2	2	2	0	2	3	1	0	0	3	0	2	0	1	0	0	0	24	1	2639.34	O88968	O88968	403	426	Tcn2	Transcobalamin-2	yes	yes	3	2.5546E-09	58.457	2	1	2	2	1
APEEILAEK	NISLSTMIDGVVLPKAPEEILAEKSFNTVP	GVVLPKAPEEILAEKSFNTVPYIVGFNKQE	K	A	P	E	K	S	2	0	0	0	0	0	3	0	0	1	1	1	0	0	1	0	0	0	0	0	0	0	9	0	998.528	D3Z5G7;Q8VCC2;E9PYP1;P23953;Q8VCT4	P23953	319	327	Ces1b;Ces1;Ces1a;Ces1c;Ces1d	Carboxylic ester hydrolase;Liver carboxylesterase 1;Carboxylesterase 1C;Carboxylesterase 1D	no	no	2	2.5224E-05	144.09	2	3	2	2	2
APEWYIGDQNPMLNSEGK	YGGAESQGQSSACYKAPEWYIGDQNPMLNS	WYIGDQNPMLNSEGKVTVVALLQASUYLCL	K	A	P	G	K	V	1	0	2	1	0	1	2	2	0	1	1	1	1	0	2	1	0	1	1	0	0	0	18	0	2047.93	P70274;E0CX80;E0CZ76;E0CY03	P70274	31	48	Sepp1	Selenoprotein P	yes	no	2;3	1.7887000000000001E-41	193.62	3	3	1	1
APFALQVNTLPLNFDK	QTSLKYNILPVADGKAPFALQVNTLPLNFD	PFALQVNTLPLNFDKAGDHRTFQIRINVSY	K	A	P	D	K	A	2	0	2	1	0	1	0	0	0	0	3	1	0	2	2	0	1	0	0	1	0	0	16	0	1786.96	Q61838	Q61838	1358	1373	A2m	Alpha-2-macroglobulin;Alpha-2-macroglobulin 165 kDa subunit;Alpha-2-macroglobulin 35 kDa subunit	yes	yes	2;3	0	250.51	4	4	4	3	4
APHIQLVAQSPWLR	PLEDVRSCGLFDLRRAPHIQLVAQSPWLRN	RAPHIQLVAQSPWLRNTAFKATETQGVNLL	R	A	P	L	R	N	2	1	0	0	0	2	0	0	1	1	2	0	0	0	2	1	0	1	0	1	0	0	14	0	1614.9	P01029	P01029	103	116	C4b	Complement C4-B;Complement C4 beta chain;Complement C4 alpha chain;C4a anaphylatoxin;Complement C4 gamma chain	yes	yes	2;3	1.5353E-33	134.56	4	4	3	3	3
APIIAVTR	KSGRSAHQVARYRPRAPIIAVTRNPQTARQ	VARYRPRAPIIAVTRNPQTARQAHLYRGIF	R	A	P	T	R	N	2	1	0	0	0	0	0	0	0	2	0	0	0	0	1	0	1	0	0	1	0	0	8	0	839.523	P52480	P52480	448	455	Pkm	Pyruvate kinase PKM	yes	yes	2	0.022859	77.058		1	1	1
APITGYIIR	DITANSFTVHWVAPRAPITGYIIRHHAEHS	HWVAPRAPITGYIIRHHAEHSVGRPRQDRV	R	A	P	I	R	H	1	1	0	0	0	0	0	1	0	3	0	0	0	0	1	0	1	0	1	0	0	0	9	0	1002.59	A0A087WSN6;A0A087WR50;B9EHT6;P11276;Q3UHL6;B7ZNJ1;A0A087WS56	A0A087WSN6	1382	1390	Fn1	Fibronectin;Anastellin	yes	no	2	8.3056E-07	138.83		2	1	1
APLAATAR	FAQYQSQIAALLQTKAPLAATARRCRRCRC	AALLQTKAPLAATARRCRRCRCPNCQAAGG	K	A	P	A	R	R	4	1	0	0	0	0	0	0	0	0	1	0	0	0	1	0	1	0	0	0	0	0	8	0	769.445	Q9JHX2	Q9JHX2	262	269	Sp5	Transcription factor Sp5	yes	yes	1	0.018047	47.045				1
APLNIAVMGETGAGK	ETVSAISSALGGIEKAPLNIAVMGETGAGK	APLNIAVMGETGAGKSSLINALQGVGDDEE	K	A	P	G	K	S	3	0	1	0	0	0	1	3	0	1	1	1	1	0	1	0	1	0	0	1	0	0	15	0	1427.74	Q5SVN9;Q8CB10;Q5SVP2;Q5SVP0;Q5NCB3	Q5SVN9	69	83	9930111J21Rik2;9930111J21Rik;9930111J21Rik1;Gm5431		yes	no	3	0.0036878	48.14	1		1	1
APPSIVLGQEQDNYGGGFQR	KPWVKKSLQREYTVKAPPSIVLGQEQDNYG	VLGQEQDNYGGGFQRSQSFVGEFSDLYMWD	K	A	P	Q	R	S	1	1	1	1	0	3	1	4	0	1	1	0	0	1	2	1	0	0	1	1	0	0	20	0	2132.03	P12246	P12246	147	166	Apcs	Serum amyloid P-component	yes	yes	2;3;4	6.480599999999999E-140	217.12	6	2	1	3	7
APQVSTPTLVEAAR	EYGFQNAILVRYTQKAPQVSTPTLVEAARN	KAPQVSTPTLVEAARNLGRVGTKCCTLPED	K	A	P	A	R	N	3	1	0	0	0	1	1	0	0	0	1	0	0	0	2	1	2	0	0	2	0	0	14	0	1438.78	P07724	P07724	439	452	Alb	Serum albumin	yes	yes	1;2;3	2.7914E-106	193.96	4	4	4	5	5
APQVSTPTLVEAARNLGR	EYGFQNAILVRYTQKAPQVSTPTLVEAARN	VSTPTLVEAARNLGRVGTKCCTLPEDQRLP	K	A	P	G	R	V	3	2	1	0	0	1	1	1	0	0	2	0	0	0	2	1	2	0	0	2	0	0	18	1	1879.03	P07724	P07724	439	456	Alb	Serum albumin	yes	yes	3	0.00021564	93.424	4	3	4	2	2
APQVYILPPPAEQLSR	SPIERTISKIKGLVRAPQVYILPPPAEQLS	PQVYILPPPAEQLSRKDVSLTCLVVGFNPG	R	A	P	S	R	K	2	1	0	0	0	2	1	0	0	1	2	0	0	0	4	1	0	0	1	1	0	0	16	0	1777.97	A0A075B5P3;A0A0A6YVP0;P01867	A0A075B5P3	234	249	Ighg2b;Igh-3	Ig gamma-2B chain C region	no	no	2;3	4.3780000000000005E-35	145.55	4	4	4	4	5
APQVYTIPPPK	APIEKTISKTKGRPKAPQVYTIPPPKEQMA	GRPKAPQVYTIPPPKEQMAKDKVSLTCMIT	K	A	P	P	K	E	1	0	0	0	0	1	0	0	0	1	0	1	0	0	4	0	1	0	1	1	0	0	11	0	1209.68	A0A075B5P4;A0A0A6YWR2;P01868;P01869	A0A075B5P4	222	232	Ighg1	Ig gamma-1 chain C region secreted form;Ig gamma-1 chain C region, membrane-bound form	no	no	2;3	0.00022437	112.36		1	1	2	2
APQVYVLPPPAEEMTK	SPIEKTISKPRGPVRAPQVYVLPPPAEEMT	PQVYVLPPPAEEMTKKEFSLTCMITGFLPA	R	A	P	T	K	K	2	0	0	0	0	1	2	0	0	0	1	1	1	0	4	0	1	0	1	2	0	0	16	0	1768.91	F6TQW2;A0A0A6YY53;P01864	F6TQW2	233	248	Ighg2c	Ig gamma-2A chain C region secreted form	yes	no	2;3	0.00064792	114.79			3	4
APQVYVLPPPAEEMTKK	SPIEKTISKPRGPVRAPQVYVLPPPAEEMT	QVYVLPPPAEEMTKKEFSLTCMITGFLPAE	R	A	P	K	K	E	2	0	0	0	0	1	2	0	0	0	1	2	1	0	4	0	1	0	1	2	0	0	17	1	1897	F6TQW2;A0A0A6YY53;P01864	F6TQW2	233	249	Ighg2c	Ig gamma-2A chain C region secreted form	yes	no	3	0.00030452	76.341			2	2
APQVYVLPPPEEEMTK	APIERTISKPKGSVRAPQVYVLPPPEEEMT	PQVYVLPPPEEEMTKKQVTLTCMVTDFMPE	R	A	P	T	K	K	1	0	0	0	0	1	3	0	0	0	1	1	1	0	4	0	1	0	1	2	0	0	16	0	1826.91	P01863;P01865	P01863	228	243	Ighg;Igh-1a	Ig gamma-2A chain C region, A allele;Ig gamma-2A chain C region, membrane-bound form	yes	no	2;3	0.00059621	110.31	4	4	3	4	4
APQVYVLPPPEEEMTKK	APIERTISKPKGSVRAPQVYVLPPPEEEMT	QVYVLPPPEEEMTKKQVTLTCMVTDFMPED	R	A	P	K	K	Q	1	0	0	0	0	1	3	0	0	0	1	2	1	0	4	0	1	0	1	2	0	0	17	1	1955.01	P01863;P01865	P01863	228	244	Ighg;Igh-1a	Ig gamma-2A chain C region, A allele;Ig gamma-2A chain C region, membrane-bound form	yes	no	2;3	3.9602E-13	85.178	4	5	3	3	4
APSAEVEMTAYVLLAYLTSESSRPTR	GDVQKVKALSFYQPRAPSAEVEMTAYVLLA	VLLAYLTSESSRPTRDLSSSDLSTASKIVK	R	A	P	T	R	D	4	2	0	0	0	0	3	0	0	0	3	0	1	0	2	4	3	0	2	2	0	0	26	1	2841.42	Q61838	Q61838	1214	1239	A2m	Alpha-2-macroglobulin;Alpha-2-macroglobulin 165 kDa subunit;Alpha-2-macroglobulin 35 kDa subunit	yes	yes	3	0.00026837	37.228	1	1
APSNQNWLTVSGGK	PETSLPTQLKDNFNRAPSNQNWLTVSGGKL	RAPSNQNWLTVSGGKLSTVCGAVASGLALH	R	A	P	G	K	L	1	0	2	0	0	1	0	2	0	0	1	1	0	0	1	2	1	1	0	1	0	0	14	0	1457.73	Q60841	Q60841	2526	2539	Reln	Reelin	yes	yes	2	0.017246	47.559	1
APSQLALFSVSDK	______________________________	______________________________	M	A	P	D	K	T	2	0	0	1	0	1	0	0	0	0	2	1	0	1	1	3	0	0	0	1	0	0	13	0	1361.72	Q9CWJ9	Q9CWJ9	2	14	Atic	Bifunctional purine biosynthesis protein PURH;Phosphoribosylaminoimidazolecarboxamide formyltransferase;IMP cyclohydrolase	yes	yes	2	0.021055	47.302				1
APWMEQEGPEYWER	VRFDSDAETPRMEPRAPWMEQEGPEYWERE	RAPWMEQEGPEYWERETQRAKGNEQSFHVS	R	A	P	E	R	E	1	1	0	0	0	1	4	1	0	0	0	0	1	0	2	0	0	2	1	0	0	0	14	0	1806.77	E9PX63;O19441;E9Q0G4;A7VMS6;G3UXE9;V9GXI4;V9GXR0;P01898;Q8HWB2	P01898	73	86	H2-Q1;Gm8909;H2-Bl;H2-Q10;H2-Q4	H-2 class I histocompatibility antigen, Q10 alpha chain	no	no	2;3	5.6152E-107	196.88	3	3	4	3	2
AQAFGDR	TANLGAGAAQPLRDRAQAFGDRIRGRLEEV	AAQPLRDRAQAFGDRIRGRLEEVGNQARDR	R	A	Q	D	R	I	2	1	0	1	0	1	0	1	0	0	0	0	0	1	0	0	0	0	0	0	0	0	7	0	763.361	P08226;A0A1B0GX15;G3UWN5	P08226	217	223	Apoe	Apolipoprotein E	yes	no	2	0.009776	114.19	1	1	1	1
AQELSYTSATTTDQHGLAEFSIDTTCISGSSLHIK	DIKGDPIPNEKVFIKAQELSYTSATTTDQH	SIDTTCISGSSLHIKVNHKEEDSCSYFYCM	K	A	Q	I	K	V	3	0	0	2	1	2	2	2	2	3	3	1	0	1	0	6	6	0	1	0	0	0	35	0	3711.76	P28665	P28665	378	412	Mug1	Murinoglobulin-1	yes	yes	4	1.0477E-11	43.15			2
AQEQLATALQNLEEAEK	ALNRRIQLLEEELDRAQEQLATALQNLEEA	EQLATALQNLEEAEKAADESERGMKVIENR	R	A	Q	E	K	A	4	0	1	0	0	3	4	0	0	0	3	1	0	0	0	0	1	0	0	0	0	0	17	0	1884.94	Q6IRU2	Q6IRU2	66	82	Tpm4	Tropomyosin alpha-4 chain	yes	yes	2;3	0.00092136	55.589	1	3	2	1	1
AQGDVFIKPQLWS	TLSPNVLNWRALNYKAQGDVFIKPQLWS__	YKAQGDVFIKPQLWS_______________	K	A	Q	W	S	-	1	0	0	1	0	2	0	1	0	1	1	1	0	1	1	1	0	1	0	1	0	0	13	1	1487.78	P14847	P14847	213	225	Crp	C-reactive protein	yes	yes	2	0.021265	70.728
AQGSHPELSSPASILIMLTDGEPTEGETDR	NLNGGLLRGIEILNKAQGSHPELSSPASIL	IMLTDGEPTEGETDRSQILKNVRNAIRGRF	K	A	Q	D	R	S	2	1	0	2	0	1	4	3	1	2	3	0	1	0	3	4	3	0	0	0	0	0	30	0	3137.48	Q61702;F8WJ05	Q61702	381	410	Itih1	Inter-alpha-trypsin inhibitor heavy chain H1	yes	no	3;4	9.695900000000001E-54	121.96	4	3	4	3	6
AQHLHSSR	MNRPFLLLMATPLERAQHLHSSRHRRALDT	MATPLERAQHLHSSRHRRALDTNYCFSSTE	R	A	Q	S	R	H	1	1	0	0	0	1	0	0	2	0	1	0	0	0	0	2	0	0	0	0	0	0	8	0	934.473	P04202	P04202	268	275	Tgfb1	Transforming growth factor beta-1;Latency-associated peptide	yes	yes	3	0.021035	50.805			1
AQHYLELGAEIAR	GGMFALGADGAPEARAQHYLELGAEIARTC	ARAQHYLELGAEIARTCHESYNRTYVKLGP	R	A	Q	A	R	T	3	1	0	0	0	1	2	1	1	1	2	0	0	0	0	0	0	0	1	0	0	0	13	0	1469.76	A0A1W2P788;P45700	A0A1W2P788	587	599	Man1a1	Mannosyl-oligosaccharide 1,2-alpha-mannosidase IA	yes	no	3	4.5394E-05	72.891	2	2	1	2
AQLLGGVDEALNLLQDMQSR	QELQEQLRVVGEDTKAQLLGGVDEALNLLQ	GVDEALNLLQDMQSRVLHHTDRVKELFHPY	K	A	Q	S	R	V	2	1	1	2	0	3	1	2	0	0	5	0	1	0	0	1	0	0	0	1	0	0	20	0	2170.11	Q8C7G5;A0A1L1SSC4	Q8C7G5	155	174	Apoa5	Apolipoprotein A-V	yes	no	3	7.2208E-06	85.855	1	1	1	1	2
AQNVPLPVSTLVEFVIAATDCTAK	TQNNGTYFKLVEISRAQNVPLPVSTLVEFV	TLVEFVIAATDCTAKEVTDPAKCNLLAEKQ	R	A	Q	A	K	E	4	0	1	1	1	1	1	0	0	1	2	1	0	1	2	1	3	0	0	4	0	0	24	0	2486.31	P29699;A0A338P703;A0A338P7G1;A0A338P7H5;A0A338P692	P29699	188	211	Ahsg	Alpha-2-HS-glycoprotein	yes	no	3	1.9574E-18	106.18	1		1		2
AQPSQAAEEPAEKADEPMEH	VSPFLDGLEERPQRKAQPSQAAEEPAEKAD	AAEEPAEKADEPMEH_______________	K	A	Q	E	H	-	5	0	0	1	0	2	5	0	1	0	0	1	1	0	3	1	0	0	0	0	0	0	20	1	2163.94	Q9R1P4;A0A1B0GS70	Q9R1P4	244	263	Psma1	Proteasome subunit alpha type-1	yes	no	3	0.00096876	48.053	1		1	1	1
AQQASWQASTR	KIDFLNNYALFLSPRAQQASWQASTRFNQY	LSPRAQQASWQASTRFNQYKYNQNFSAINN	R	A	Q	T	R	F	3	1	0	0	0	3	0	0	0	0	0	0	0	0	0	2	1	1	0	0	0	0	11	0	1232.59	E9Q414;E9Q1Y3	E9Q414	3076	3086	Apob	Apolipoprotein B-100;Apolipoprotein B-48	yes	no	2	4.7522E-57	185.6	1	2	2	2	2
AQQIQALQSNVR	LRRRIEILRRKVIEKAQQIQALQSNVRAQL	IEKAQQIQALQSNVRAQLIDMKRLEVDIDI	K	A	Q	V	R	A	2	1	1	0	0	4	0	0	0	1	1	0	0	0	0	1	0	0	0	1	0	0	12	0	1354.73	E9PV24	E9PV24	150	161	Fga	Fibrinogen alpha chain;Fibrinopeptide A;Fibrinogen alpha chain	yes	yes	2;3	5.2098E-23	155.42	2	3	2	2	3
AQSELAAHQK	GLKSKTHAVLVALKRAQSELAAHQKKILHV	VALKRAQSELAAHQKKILHVDNHIGISIAG	R	A	Q	Q	K	K	3	0	0	0	0	2	1	0	1	0	1	1	0	0	0	1	0	0	0	0	0	0	10	0	1081.55	Q9R1P4;A0A1B0GS70	Q9R1P4	52	61	Psma1	Proteasome subunit alpha type-1	yes	no	3	0.029114	26.595
AQTPQVYTIPPPR	LPAPIERTISKPKGRAQTPQVYTIPPPREQ	GRAQTPQVYTIPPPREQMSKKKVSLTCLVT	R	A	Q	P	R	E	1	1	0	0	0	2	0	0	0	1	0	0	0	0	4	0	2	0	1	1	0	0	13	0	1466.79	A0A075B5P5;A0A1Y7VJN6;P03987	A0A075B5P5	226	238	Ighg3	Ig gamma-3 chain C region	yes	no	2	0.012991	51.092
AQVHVSEEGGEPEAMLQVLGPK	TQVSKGIRDNERSGRAQVHVSEEGGEPEAM	EGGEPEAMLQVLGPKPALPEGTEDTAKEDA	R	A	Q	P	K	P	2	0	0	0	0	2	4	3	1	0	2	1	1	0	2	1	0	0	0	3	0	0	22	0	2304.14	P13020;A0A0J9YUQ8;A6PWS5	P13020	254	275	Gsn	Gelsolin	yes	no	2;3	3.8643E-60	111.49		2	4	2	2
AQVHVSEEGGEPEAMLQVLGPKPALPEGTEDTAK	TQVSKGIRDNERSGRAQVHVSEEGGEPEAM	GPKPALPEGTEDTAKEDAANRRLAKLYKVS	R	A	Q	A	K	E	4	0	0	1	0	2	6	4	1	0	3	2	1	0	4	1	2	0	0	3	0	0	34	1	3513.73	P13020;A0A0J9YUQ8;A6PWS5	P13020	254	287	Gsn	Gelsolin	yes	no	3;4;5	1.4736E-42	99.603	1	1	2	3	4
AQVHVSEEGGEPEAMLQVLGPKPALPEGTEDTAKEDAANR	TQVSKGIRDNERSGRAQVHVSEEGGEPEAM	PEGTEDTAKEDAANRRLAKLYKVSNGAGSM	R	A	Q	N	R	R	6	1	1	2	0	2	7	4	1	0	3	2	1	0	4	1	2	0	0	3	0	0	40	2	4170.02	P13020;A0A0J9YUQ8;A6PWS5	P13020	254	293	Gsn	Gelsolin	yes	no	4;5;6	1.4879E-36	62.938	3	3	4	3	3
AQVLGYTSATTTDQHGLAK	DIKGDPIPNERVFIKAQVLGYTSATTTDQH	GYTSATTTDQHGLAKFSIDTAGFSGSSLHI	K	A	Q	A	K	F	3	0	0	1	0	2	0	2	1	0	2	1	0	0	0	1	4	0	1	1	0	0	19	0	1960.99	P28666	P28666	378	396	Mug2	Murinoglobulin-2	yes	yes	2;3	1.5487E-63	169.62	1	3	3	2	2
AQYVLTSPEASSR	TGKCKSWMTPCPEEKAQYVLTSPEASSRFG	EKAQYVLTSPEASSRFGSSLVSVRSKGRNQ	K	A	Q	S	R	F	2	1	0	0	0	1	1	0	0	0	1	0	0	0	1	3	1	0	1	1	0	0	13	0	1407.7	Q8VCU2;O70362	Q8VCU2	789	801	Gpld1	Phosphatidylinositol-glycan-specific phospholipase D	yes	no	2	2.3111000000000002E-27	146.11	2	2	2	2	2
AREDHTVPER	NINDGLLKGIEMLNKAREDHTVPERSTSII	EMLNKAREDHTVPERSTSIIIMLTDGDANT	K	A	R	E	R	S	1	2	0	1	0	0	2	0	1	0	0	0	0	0	1	0	1	0	0	1	0	0	10	1	1208.59	Q61704;A0A2I3BRQ3	Q61704	376	385	Itih3	Inter-alpha-trypsin inhibitor heavy chain H3	yes	no	3;4	0.0013758	91.701	2	1	2	3	1
AREEIFLVTLK	VEGMEDWEKESQLQRAREEIFLVTLKDIMD	QLQRAREEIFLVTLKDIMDYYKDTTGSHTF	R	A	R	L	K	D	1	1	0	0	0	0	2	0	0	1	2	1	0	1	0	0	1	0	0	1	0	0	11	1	1317.77	Q64726	Q64726	87	97	Azgp1	Zinc-alpha-2-glycoprotein	yes	yes	3	0.0071903	61.375	2	2	2	1	1
ARFEELNADLFR	DSLYEGIDFYTSITRARFEELNADLFRGTL	ITRARFEELNADLFRGTLDPVEKALRDAKL	R	A	R	F	R	G	2	2	1	1	0	0	2	0	0	0	2	0	0	2	0	0	0	0	0	0	0	0	12	1	1479.75	P63017;Q504P4;P17156	P63017	300	311	Hspa8;Hspa2	Heat shock cognate 71 kDa protein;Heat shock-related 70 kDa protein 2	yes	no	3	0.0091773	43.991					1
ARGEELDEDLFLQLTGGHEAF	HEYIGGYIFLSTRERARGEELDEDLFLQLT	DEDLFLQLTGGHEAF_______________	R	A	R	A	F	-	2	1	0	2	0	1	4	3	1	0	4	0	0	2	0	0	1	0	0	0	0	0	21	1	2346.11	Q8K1B8	Q8K1B8	645	665	Fermt3	Fermitin family homolog 3	yes	yes	3	0.0025111	40.369		1	1
ARPALEDLR	YHTRAKTHLKTLGEKARPALEDLRHSLMPM	KTLGEKARPALEDLRHSLMPMLETLKTQVQ	K	A	R	L	R	H	2	2	0	1	0	0	1	0	0	0	2	0	0	0	1	0	0	0	0	0	0	0	9	1	1039.58	Q00623	Q00623	228	236	Apoa1	Apolipoprotein A-I;Proapolipoprotein A-I;Truncated apolipoprotein A-I	yes	yes	2;3	0.00037889	122.28	2	2	3	1	3
ASAGLLGAHAAAITAYALTLTK	VEASITKANSFLGQKASAGLLGAHAAAITA	AHAAAITAYALTLTKASEDLRNVAHNSLMA	K	A	S	T	K	A	8	0	0	0	0	0	0	2	1	1	4	1	0	0	0	1	3	0	1	0	0	0	22	0	2084.16	P01029	P01029	1179	1200	C4b	Complement C4-B;Complement C4 beta chain;Complement C4 alpha chain;C4a anaphylatoxin;Complement C4 gamma chain	yes	yes	3	3.21E-08	82.635	2	2	2	2
ASASYYEQYHSLNEIYSWIEVITEQHPDMLQK	DLIEQQTFNDTVSPRASASYYEQYHSLNEI	WIEVITEQHPDMLQKIYIGSSFEKYPLYVL	R	A	S	Q	K	I	2	0	1	1	0	3	4	0	2	3	2	1	1	0	1	4	1	1	4	1	0	0	32	0	3871.8	Q9JHH6	Q9JHH6	114	145	Cpb2	Carboxypeptidase B2	yes	yes	4	3.4995E-20	60.093	2	2
ASDHINNWLAWYQQK	YLSVSLGGRVTITCKASDHINNWLAWYQQK	ASDHINNWLAWYQQKPGNAPRLLISGATSL	K	A	S	Q	K	P	2	0	2	1	0	2	0	0	1	1	1	1	0	0	0	1	0	2	1	0	0	0	15	0	1872.89	A0A075B666	A0A075B666	45	59	Igkv12-47		yes	yes	3	0.00055	64.394				2
ASDHINNWLAWYQQKPGNAPR	YLSVSLGGRVTITCKASDHINNWLAWYQQK	NWLAWYQQKPGNAPRLLISGATSLETGVPS	K	A	S	P	R	L	3	1	3	1	0	2	0	1	1	1	1	1	0	0	2	1	0	2	1	0	0	0	21	1	2465.2	A0A075B666	A0A075B666	45	65	Igkv12-47		yes	yes	4	0.0011974	42.309				2
ASDTSITWNNLK	QGIFPKGYYAVAVVKASDTSITWNNLKGKK	VVKASDTSITWNNLKGKKSCHTGVDRTAGW	K	A	S	L	K	G	1	0	2	1	0	0	0	0	0	1	1	1	0	0	0	2	2	1	0	0	0	0	12	0	1348.66	Q921I1;F7CJN9;F7BAE9	Q921I1	456	467	Tf;Trf	Serotransferrin	yes	no	2	5.5925E-131	203.29	2	2	2	2	2
ASEAGQYFLMAQNK	AIYRYTFKLFLNRVKASEAGQYFLMAQNKA	KASEAGQYFLMAQNKAGWNNLTFELTLRYP	K	A	S	N	K	A	3	0	1	0	0	2	1	1	0	0	1	1	1	1	0	1	0	0	1	0	0	0	14	0	1556.73	P09581	P09581	371	384	Csf1r	Macrophage colony-stimulating factor 1 receptor	yes	yes	2	0.0071688	58.699	1				1
ASEDIYNR	SFSVSLGDRVTITCKASEDIYNRLAWYQQK	RVTITCKASEDIYNRLAWYQQKPGNAPRLL	K	A	S	N	R	L	1	1	1	1	0	0	1	0	0	1	0	0	0	0	0	1	0	0	1	0	0	0	8	0	966.441	A0A140T8N3	A0A140T8N3	45	52			yes	yes	2	0.027125	107.67
ASENIYSNLAWYQQK	SLSVSVGETVTITCRASENIYSNLAWYQQK	ASENIYSNLAWYQQKQGKSPQLLVYAATNL	R	A	S	Q	K	Q	2	0	2	0	0	2	1	0	0	1	1	1	0	0	0	2	0	1	2	0	0	0	15	0	1813.86	A0A140T8P6	A0A140T8P6	45	59			yes	yes	2;3	0	248.98	1	2		3	2
ASENIYSYLAWYQQK	SLSASVGETVTITCRASENIYSYLAWYQQK	ASENIYSYLAWYQQKQGKSPQLLVYNAKTL	R	A	S	Q	K	Q	2	0	1	0	0	2	1	0	0	1	1	1	0	0	0	2	0	1	3	0	0	0	15	0	1862.88	A0A140T8M2	A0A140T8M2	45	59			no	no	2;3	0.00034619	83.499					2
ASENIYYSLAWYQQK	SLAASVGETVTITCRASENIYYSLAWYQQK	ASENIYYSLAWYQQKQGKSPQLLIYNANSL	R	A	S	Q	K	Q	2	0	1	0	0	2	1	0	0	1	1	1	0	0	0	2	0	1	3	0	0	0	15	0	1862.88	A0A075B5M8;A0A0G2JEI7	A0A075B5M8	44	58	Igkv12-38		yes	no	2;3	0.0015214	91.313			2	2
ASENVGTYVSWYQQKPEQSPK	SMSMSVGERVTLSCKASENVGTYVSWYQQK	TYVSWYQQKPEQSPKLLIYGASNRYTGVPD	K	A	S	P	K	L	1	0	1	0	0	3	2	1	0	0	0	2	0	0	2	3	1	1	2	2	0	0	21	1	2425.16	A0A140T8P2;A0A075B5N2;A0A0G2JEI6	A0A140T8P2	45	65	Igkv6-29		yes	no	2;3	2.1329E-16	104.86	3	3	1	3	2
ASESVDNYGISFMNWFQQKPGQPPK	SLAVSLGQRATISCRASESVDNYGISFMNW	SFMNWFQQKPGQPPKLLIYAASNQGSGVPA	R	A	S	P	K	L	1	0	2	1	0	3	1	2	0	1	0	2	1	2	3	3	0	1	1	1	0	0	25	1	2854.34	P01654;P01655;A0A075B5P0	P01654	25	49	Igkv3-2	Ig kappa chain V-III region PC 2880/PC 1229;Ig kappa chain V-III region PC 7132	yes	no	3	0.0013943	32.337				1
ASESVDSYGNSFMHWYQQK	SLAVSLGQRATISCRASESVDSYGNSFMHW	VDSYGNSFMHWYQQKPGQPPKLLIYRASNL	R	A	S	Q	K	P	1	0	1	1	0	2	1	1	1	0	0	1	1	1	0	4	0	1	2	1	0	0	19	0	2262.96	P01663;P01662;A0A075B5N8;A0A0G2JGN0;P01661;P01660;A0A140T8M6	P01660	25	43	Igkv3-10	Ig kappa chain V-III region PC 4050;Ig kappa chain V-III region ABPC 22/PC 9245;Ig kappa chain V-III region MOPC 63;Ig kappa chain V-III region PC 3741/TEPC 111	no	no	3	0.0012421	46.621					1
ASESVDSYGNSFMHWYQQKPGQPPK	SLAVSLGQRATISCRASESVDSYGNSFMHW	SFMHWYQQKPGQPPKLLIYRASNLESGIPA	R	A	S	P	K	L	1	0	1	1	0	3	1	2	1	0	0	2	1	1	3	4	0	1	2	1	0	0	25	1	2867.3	P01663;P01662;A0A075B5N8;A0A0G2JGN0;P01661;P01660;A0A140T8M6	P01660	25	49	Igkv3-10	Ig kappa chain V-III region PC 4050;Ig kappa chain V-III region ABPC 22/PC 9245;Ig kappa chain V-III region MOPC 63;Ig kappa chain V-III region PC 3741/TEPC 111	no	no	3;4	0.00024188	37.896			2	2
ASESVEYYGTSLMQWYQQK	SLAVSLGQRATISCRASESVEYYGTSLMQW	VEYYGTSLMQWYQQKPGQPPKLLIYAASNV	R	A	S	Q	K	P	1	0	0	0	0	3	2	1	0	0	1	1	1	0	0	3	1	1	3	1	0	0	19	0	2297.03	A0A075B5P1	A0A075B5P1	45	63	Igkv3-1		yes	yes	2	0.0087695	40.577				1
ASESVEYYGTSLMQWYQQKPGQPPK	SLAVSLGQRATISCRASESVEYYGTSLMQW	SLMQWYQQKPGQPPKLLIYAASNVESGVPA	R	A	S	P	K	L	1	0	0	0	0	4	2	2	0	0	1	2	1	0	3	3	1	1	3	1	0	0	25	1	2901.36	A0A075B5P1	A0A075B5P1	45	69	Igkv3-1		yes	yes	3	1.382E-10	63.165				2
ASETLTAQ	MLETLKTQVQSVIDKASETLTAQ_______	VQSVIDKASETLTAQ_______________	K	A	S	A	Q	-	2	0	0	0	0	1	1	0	0	0	1	0	0	0	0	1	2	0	0	0	0	0	8	0	819.397	Q00623	Q00623	257	264	Apoa1	Apolipoprotein A-I;Proapolipoprotein A-I;Truncated apolipoprotein A-I	yes	yes	1;2	0.0052621	130.22	2	4	4	3	2
ASEYLTYWEPR	PMGLSTGVISDSQIKASEYLTYWEPRLARL	SQIKASEYLTYWEPRLARLNNAGSYNAWSI	K	A	S	P	R	L	1	1	0	0	0	0	2	0	0	0	1	0	0	0	1	1	1	1	2	0	0	0	11	0	1413.66	O88783	O88783	1884	1894	F5	Coagulation factor V;Coagulation factor V heavy chain;Coagulation factor V light chain	yes	yes	2	1.1622E-06	147.2	2	2	2	1	2
ASGALINEYWVLTAAHVLEK	KIENFPWQVFFNHPRASGALINEYWVLTAA	INEYWVLTAAHVLEKISDPLMYVGTMSVRT	R	A	S	E	K	I	4	0	1	0	0	0	2	1	1	1	3	1	0	0	0	1	1	1	1	2	0	0	20	0	2184.16	E9Q6C2;Q8CG14	E9Q6C2	466	485	C1s1;C1sa	Complement C1s-A subcomponent;Complement C1s-A subcomponent heavy chain;Complement C1s-A subcomponent light chain	yes	no	2;3	6.0597E-10	108.18	3	2	3	2	3
ASGFTFTDYYMHWVK	PVLVKPGPSVKISCKASGFTFTDYYMHWVK	ASGFTFTDYYMHWVKQSHGKSLEWIGLVYP	K	A	S	V	K	Q	1	0	0	1	0	0	0	1	1	0	0	1	1	2	0	1	2	1	2	1	0	0	15	0	1851.83	A0A075B5V3;A0A0A6YXT2	A0A075B5V3	42	56	Ighv1-36		yes	no	3	0.012899	35.659	2			1
ASGHPGDPESQQR	DVLDKASSLIEEAKKASGHPGDPESQQRLA	KKASGHPGDPESQQRLAQVAKAVTQALNRC	K	A	S	Q	R	L	1	1	0	1	0	2	1	2	1	0	0	0	0	0	2	2	0	0	0	0	0	0	13	0	1364.61	P26039	P26039	1172	1184	Tln1	Talin-1	yes	yes	3	0.032899	25.978					1
ASGIIDTLFQDR	QQSQVLDAMQDSFARASGIIDTLFQDRFFA	FARASGIIDTLFQDRFFARELHDPHYFSPI	R	A	S	D	R	F	1	1	0	2	0	1	0	1	0	2	1	0	0	1	0	1	1	0	0	0	0	0	12	0	1334.68	Q06890;E9PUU2;E9PXG5;E9Q8Y5;E9Q9B8	Q06890	182	193	Clu	Clusterin;Clusterin beta chain;Clusterin alpha chain	yes	no	2	1.5037E-23	157.66	2	2	2	2	1
ASGNAQIGK	______________________________	______________________________	M	A	S	G	K	S	2	0	1	0	0	1	0	2	0	1	0	1	0	0	0	1	0	0	0	0	0	0	9	0	844.44	Q61171;D3Z4A4	Q61171	2	10	Prdx2	Peroxiredoxin-2	yes	no	1;2	1.0444E-05	145.34	2	2	2	4	4
ASGNIHNYLAWYQQK	SLSASVGETVTITCRASGNIHNYLAWYQQK	ASGNIHNYLAWYQQKQGKSPQLLVYNAKTL	R	A	S	Q	K	Q	2	0	2	0	0	2	0	1	1	1	1	1	0	0	0	1	0	1	2	0	0	0	15	0	1791.87	P01635	P01635	45	59		Ig kappa chain V-V region K2	yes	yes	3	3.3545E-11	124.45				2	2
ASGPGLNTTGVPASLPVEFTIDAK	FKVKVLPTHDASKVKASGPGLNTTGVPASL	GVPASLPVEFTIDAKDAGEGLLAVQITDPE	K	A	S	A	K	D	3	0	1	1	0	0	1	3	0	1	2	1	0	1	3	2	3	0	0	2	0	0	24	0	2341.22	B7FAV1;B7FAU9;Q8BTM8	B7FAV1	1526	1549	Flna	Filamin-A	yes	no	3	2.9348E-12	70.138					1
ASGVAVSDGVIK	______________________________	______________________________	M	A	S	I	K	V	2	0	0	1	0	0	0	2	0	1	0	1	0	0	0	2	0	0	0	3	0	0	12	0	1101.6	P18760;A0A494B9A7;F8WGL3	P18760	2	13	Cfl1	Cofilin-1	yes	no	1;2	7.4913E-05	109.42		1	3	2
ASGYAFSSSWMNWVK	PELVKPGASVKISCKASGYAFSSSWMNWVK	ASGYAFSSSWMNWVKQRPGKGLEWIGRIYP	K	A	S	V	K	Q	2	0	1	0	0	0	0	1	0	0	0	1	1	1	0	4	0	2	1	1	0	0	15	0	1719.77	A0A0B4J1J7;A0A0G2JEU7	A0A0B4J1J7	24	38	Ighv1-82		yes	no	2	0.0041372	72.652	2	1	1	2	1
ASGYAFSSYWMNWVK	AELVKPGASVKISCKASGYAFSSYWMNWVK	ASGYAFSSYWMNWVKQRPGKGLEWIGQIYP	K	A	S	V	K	Q	2	0	1	0	0	0	0	1	0	0	0	1	1	1	0	3	0	2	2	1	0	0	15	0	1795.8	A0A075B5Y3	A0A075B5Y3	43	57	Ighv1-80		yes	yes	2	0.004201	56.359		2		1	2
ASGYSFTDYNMNWVK	PELVKPGASVKISCKASGYSFTDYNMNWVK	ASGYSFTDYNMNWVKQSNGKSLEWIGVINP	K	A	S	V	K	Q	1	0	2	1	0	0	0	1	0	0	0	1	1	1	0	2	1	1	2	1	0	0	15	0	1781.77	A0A075B5V5	A0A075B5V5	43	57	Ighv1-39		yes	yes	2	1.7471E-10	156.48				2	2
ASGYSFTGYYMHWVK	PELVKPGASVKISCKASGYSFTGYYMHWVK	ASGYSFTGYYMHWVKQSSEKSLEWIGEINP	K	A	S	V	K	Q	1	0	0	0	0	0	0	2	1	0	0	1	1	1	0	2	1	1	3	1	0	0	15	0	1795.8	A0A075B5V7;A0A0A6YXN5	A0A075B5V7	24	38	Ighv1-43		no	no	3	0.0073546	35.891					1
ASGYSFTGYYMNWVK	PELVKPGASVKISCKASGYSFTGYYMNWVK	ASGYSFTGYYMNWVKQSPEKSLEWIGEINP	K	A	S	V	K	Q	1	0	1	0	0	0	0	2	0	0	0	1	1	1	0	2	1	1	3	1	0	0	15	0	1772.79	A0A075B5V6;A0A0A6YY38	A0A075B5V6	24	38	Ighv1-42		yes	no	2	0.0065065	51.092				2
ASGYTFTDHIMNWVK	AELASPGASVTLSCKASGYTFTDHIMNWVK	ASGYTFTDHIMNWVKKRPGQGLEWIGRIYP	K	A	S	V	K	K	1	0	1	1	0	0	0	1	1	1	0	1	1	1	0	1	2	1	1	1	0	0	15	0	1768.82	A0A0A6YWI9	A0A0A6YWI9	43	57	Ighv1-11		yes	yes	2;3	0.00046323	77.527		3
ASGYTFTDYEMHWVK	AELVRPGASVTLSCKASGYTFTDYEMHWVK	ASGYTFTDYEMHWVKQTPVHGLEWIGAIDP	K	A	S	V	K	Q	1	0	0	1	0	0	1	1	1	0	0	1	1	1	0	1	2	1	2	1	0	0	15	0	1833.8	A0A0A6YXA5	A0A0A6YXA5	43	57	Ighv1-15		yes	yes	3	0.00046445	78.814	1	2		1	2
ASGYTFTDYNMDWVK	PELVKPGASVKIPCKASGYTFTDYNMDWVK	ASGYTFTDYNMDWVKQSHGKSLEWIGDINP	K	A	S	V	K	Q	1	0	1	2	0	0	0	1	0	0	0	1	1	1	0	1	2	1	2	1	0	0	15	0	1796.77	A0A075B5U4;A0A0A6YXN4	A0A075B5U4	42	56	Ighv1-18		yes	no	2	6.5679E-05	134.75				2	2
ASGYTFTDYNMHWVK	PELVKPGASVKMSCKASGYTFTDYNMHWVK	ASGYTFTDYNMHWVKQSHGKSLEWIGYINP	K	A	S	V	K	Q	1	0	1	1	0	0	0	1	1	0	0	1	1	1	0	1	2	1	2	1	0	0	15	0	1818.8	A0A075B5U7;P01758	A0A075B5U7	43	57	Ighv1-22;Igh-VJ558	Ig heavy chain V region 108A	yes	no	3	0.00061611	76.262	2	2	1	2	2
ASGYTFTDYYINWVK	AELVRPGASVKLSCKASGYTFTDYYINWVK	ASGYTFTDYYINWVKQRPGQGLEWIARIYP	K	A	S	V	K	Q	1	0	1	1	0	0	0	1	0	1	0	1	0	1	0	1	2	1	3	1	0	0	15	0	1826.85	A0A0B4J1M0;A0A0G2JGS9;A0A0B4J1N0;A0A0G2JFE9;A0A075B5Y5;A0A075B5Y2	A0A0B4J1N0	24	38	Ighv1-77;Ighv1-76;Ighv1-84;Ighv1-75		no	no	2	3.4505E-07	110.86		1	2	2	1
ASGYTFTDYYMNWVK	PELVKPGASVKISCKASGYTFTDYYMNWVK	ASGYTFTDYYMNWVKQSHGKSLEWIGDINP	K	A	S	V	K	Q	1	0	1	1	0	0	0	1	0	0	0	1	1	1	0	1	2	1	3	1	0	0	15	0	1844.81	A0A075B5V0;A0A075B5U5;A0A0A6YWX0	A0A075B5V0	43	57	Ighv1-26;Ighv1-19		no	no	2	8.9924E-224	206.24	2	1	1	2	2
ASGYTFTEYPMHWVK	PELKKPGETVKISCKASGYTFTEYPMHWVK	ASGYTFTEYPMHWVKQAPGKGFKWMGMIYT	K	A	S	V	K	Q	1	0	0	0	0	0	1	1	1	0	0	1	1	1	1	1	2	1	2	1	0	0	15	0	1815.83	A0A075B5S1;A0A0B4J1P3	A0A075B5S1	24	38	Ighv9-1		yes	no	3	0.014494	27.734				1
ASGYTFTSYDINWVK	PELVKPGALVKISCKASGYTFTSYDINWVK	ASGYTFTSYDINWVKQRPGQGLEWIGWIYP	K	A	S	V	K	Q	1	0	1	1	0	0	0	1	0	1	0	1	0	1	0	2	2	1	2	1	0	0	15	0	1750.82	P06327;A0A075B5Y6	P06327	43	57	Gm5629;Ighv1-85	Ig heavy chain V region VH558 A1/A4	yes	no	2	4.5081E-34	143.28	1	1
ASGYTFTSYGISWVK	AELARPGASVKLSCKASGYTFTSYGISWVK	ASGYTFTSYGISWVKQRTGQGLEWIGEIYP	K	A	S	V	K	Q	1	0	0	0	0	0	0	2	0	1	0	1	0	1	0	3	2	1	2	1	0	0	15	0	1665.8	A0A075B5Y4	A0A075B5Y4	43	57	Ighv1-81		yes	yes	2	0.0011808	83.182		1	2	2	2
ASGYTFTSYWMDWVK	AELVRPGSSVKLSCKASGYTFTSYWMDWVK	ASGYTFTSYWMDWVKQRPGQGLEWIGNIYP	K	A	S	V	K	Q	1	0	0	1	0	0	0	1	0	0	0	1	1	1	0	2	2	2	2	1	0	0	15	0	1840.81	P01749	P01749	43	57	Ighv1-61	Ig heavy chain V region 3	yes	yes	2	0.028687	38.634
ASGYTFTSYWMHWVK	AELVKPGASVKVSCKASGYTFTSYWMHWVK	ASGYTFTSYWMHWVKQRPGQGLEWIGRIHP	K	A	S	V	K	Q	1	0	0	0	0	0	0	1	1	0	0	1	1	1	0	2	2	2	2	1	0	0	15	0	1862.85	A0A075B5Y1;A0A0G2JGK2;P01750;P01748;A0A075B5W2;A0A0A6YXC3;A0A075B5T7;A0A075B5X0;A0A0A6YXE0;A0A075B5W3;A0A075B5X3;P01754;P06328;P01753;A0A075B5X7;A0A0G2JFS5	A0A075B5Y1	42	56	Ighv1-74;Ighv1-52;Ighv1-7;Ighv1-59;Ighv1-53;Ighv1-64;Ighv1-62-3;Ighv1-69	Ig heavy chain V region 102;Ig heavy chain V region 23;Ig heavy chain V region 1-62-3;Ig heavy chain V region VH558 B4;Ig heavy chain V region 186-1	no	no	3	0.010201	37.555				2
ASGYTFTTAGMQWVQK	PELKKPGETVKISCKASGYTFTTAGMQWVQ	SGYTFTTAGMQWVQKMPGKGFKWIGWINTH	K	A	S	Q	K	M	2	0	0	0	0	2	0	2	0	0	0	1	1	1	0	1	3	1	1	1	0	0	16	0	1774.83	A0A075B5S9;A0A0A6YWH6	A0A075B5S9	24	39	Ighv9-4		yes	no	3	0.042095	23.481				1
ASGYTFTTYGMSWVK	PELKKPGETVKISCKASGYTFTTYGMSWVK	ASGYTFTTYGMSWVKQAPGKGLKWMGWINT	K	A	S	V	K	Q	1	0	0	0	0	0	0	2	0	0	0	1	1	1	0	2	3	1	2	1	0	0	15	0	1697.78	A0A0B4J1J5	A0A0B4J1J5	43	57	Ighv9-3		yes	yes	2	3.0639E-05	107.34	2	2	2	2	2
ASGYTFTTYPIEWMK	AELVKPGASVKMSCKASGYTFTTYPIEWMK	ASGYTFTTYPIEWMKQNHGKSLEWIGNFHP	K	A	S	M	K	Q	1	0	0	0	0	0	1	1	0	1	0	1	1	1	1	1	3	1	2	0	0	0	15	0	1793.83	A0A075B5V8;A0A0A6YY41	A0A075B5V8	24	38	Ighv1-47		yes	no	2	0.0045165	65.574		1	1		1
ASIAALEAK	AKLQEMESAVKSKYKASIAALEAKIAQLEE	VKSKYKASIAALEAKIAQLEEQLDNETKER	K	A	S	A	K	I	4	0	0	0	0	0	1	0	0	1	1	1	0	0	0	1	0	0	0	0	0	0	9	0	872.497	Q8VDD5	Q8VDD5	1807	1815	Myh9	Myosin-9	yes	yes	2	0.012641	81.296					2
ASIHEAWTDGK	RLERLDHLAEKFRQKASIHEAWTDGKEAML	FRQKASIHEAWTDGKEAMLRQKDYETATLS	K	A	S	G	K	E	2	0	0	1	0	0	1	1	1	1	0	1	0	0	0	1	1	1	0	0	0	0	11	0	1213.57	A1BN54;Q7TPR4	A1BN54	403	413	Actn1	Alpha-actinin-1	no	no	3	0.010562	49.448	1	1	2		2
ASISYSSK	DQKSCEPTVPFPCGRASISYSSKKITRAET	VPFPCGRASISYSSKKITRAETVFSNMDYE	R	A	S	S	K	K	1	0	0	0	0	0	0	0	0	1	0	1	0	0	0	4	0	0	1	0	0	0	8	0	841.418	P16294	P16294	181	188	F9	Coagulation factor IX;Coagulation factor IXa light chain;Coagulation factor IXa heavy chain	yes	yes	2	0.016961	84.568			1
ASLEHQSHK	SADQSDVIDSQASSKASLEHQSHKFHSHKD	SQASSKASLEHQSHKFHSHKDKLVLDPKSK	K	A	S	H	K	F	1	0	0	0	0	1	1	0	2	0	1	1	0	0	0	2	0	0	0	0	0	0	9	0	1035.51	F8WIP8;P10923	F8WIP8	250	258	Spp1	Osteopontin	yes	no	3	0.00095068	89.886				1	1
ASLNNEIK	YFHKLSVPRLDFSSKASLNNEIKTLLEAGH	RLDFSSKASLNNEIKTLLEAGHVALTSSGT	K	A	S	I	K	T	1	0	2	0	0	0	1	0	0	1	1	1	0	0	0	1	0	0	0	0	0	0	8	0	887.471	E9Q414;E9Q1Y3	E9Q414	2898	2905	Apob	Apolipoprotein B-100;Apolipoprotein B-48	yes	no	2	0.0022082	127.12	2	2	1	1	2
ASMAFLQK	KGEIDSRVAIDLTNKASMAFLQKHLGLQKD	AIDLTNKASMAFLQKHLGLQKDFDQWDPLV	K	A	S	Q	K	H	2	0	0	0	0	1	0	0	0	0	1	1	1	1	0	1	0	0	0	0	0	0	8	0	894.463	Q60963	Q60963	386	393	Pla2g7	Platelet-activating factor acetylhydrolase	yes	yes	2	0.022759	77.741				1
ASNLESGIPAR	YQQKPGQPPKLLIYRASNLESGIPARFSGS	LIYRASNLESGIPARFSGSGSRTDFTLTIN	R	A	S	A	R	F	2	1	1	0	0	0	1	1	0	1	1	0	0	0	1	2	0	0	0	0	0	0	11	0	1113.58	P01660;A0A140T8M6	P01660	55	65		Ig kappa chain V-III region PC 3741/TEPC 111	yes	no	2	0.01309	73.233
ASNLHTGVPSR	YQQKPGNIPKLLIYKASNLHTGVPSRFSGS	LIYKASNLHTGVPSRFSGSGSGTGFTLTIS	K	A	S	S	R	F	1	1	1	0	0	0	0	1	1	0	1	0	0	0	1	2	1	0	0	1	0	0	11	0	1137.59	A0A140T8P3	A0A140T8P3	71	81			yes	yes	3	6.7453E-05	103.88		2
ASQDIGSSLNWLQQEPDGTIK	SLSASLGERVSLTCRASQDIGSSLNWLQQE	SSLNWLQQEPDGTIKRLIYATSSLDSGVPK	R	A	S	I	K	R	1	0	1	2	0	3	1	2	0	2	2	1	0	0	1	3	1	1	0	0	0	0	21	0	2286.11	A0A140T8N0;P01639	A0A140T8N0	47	67	Gm5571	Ig kappa chain V-V region MOPC 41	yes	no	2;3	8.878000000000001E-208	261.39	1		2	5	2
ASQDIGSSLNWLQQEPDGTIKR	SLSASLGERVSLTCRASQDIGSSLNWLQQE	SLNWLQQEPDGTIKRLIYATSSLDSGVPKR	R	A	S	K	R	L	1	1	1	2	0	3	1	2	0	2	2	1	0	0	1	3	1	1	0	0	0	0	22	1	2442.21	A0A140T8N0;P01639	A0A140T8N0	47	68	Gm5571	Ig kappa chain V-V region MOPC 41	yes	no	3	3.2573E-42	132.76	1	2	2	4
ASQDINNYLNWYQQKPDGTVK	SLSASLGDRVTISCRASQDINNYLNWYQQK	NYLNWYQQKPDGTVKLLIYYTSRLHSGVPS	R	A	S	V	K	L	1	0	3	2	0	3	0	1	0	1	1	2	0	0	1	1	1	1	2	1	0	0	21	1	2481.19	P01647	P01647	25	45		Ig kappa chain V-V region HP 124E1	yes	yes	3	5.6544E-12	105.06
ASQDINSYLSWFQQKPGK	SMYASLGERVTITCKASQDINSYLSWFQQK	DINSYLSWFQQKPGKSPKTLIYRANRLVDG	K	A	S	G	K	S	1	0	1	1	0	3	0	1	0	1	1	2	0	1	1	3	0	1	1	0	0	0	18	1	2096.03	A0A140T8P9;P01638	A0A140T8P9	47	64		Ig kappa chain V-V region L6	yes	no	3	0.00026236	81.317	1		1		1
ASQDISNYLNWYQQKPDGTVK	SLSASLGDRVTISCRASQDISNYLNWYQQK	NYLNWYQQKPDGTVKLLIYYTSRLHSGVPS	R	A	S	V	K	L	1	0	2	2	0	3	0	1	0	1	1	2	0	0	1	2	1	1	2	1	0	0	21	1	2454.18	P01645;P01644;A0A140T8M1;P01646	P01645	25	45		Ig kappa chain V-V region HP 93G7;Ig kappa chain V-V region HP R16.7;Ig kappa chain V-V region HP 123E6	no	no	3;4	8.177700000000001E-84	153.06	1	1	2	2	2
ASQDVGTAVAWYQQK	FMSTSVGDRVSITCKASQDVGTAVAWYQQK	ASQDVGTAVAWYQQKPGQSPKLLIYWASTR	K	A	S	Q	K	P	3	0	0	1	0	3	0	1	0	0	0	1	0	0	0	1	1	1	1	2	0	0	15	0	1650.8	A0A140T8N5	A0A140T8N5	45	59			yes	yes	3	0.035343	17.14
ASQDVGTAVAWYQQKPGQSPK	FMSTSVGDRVSITCKASQDVGTAVAWYQQK	TAVAWYQQKPGQSPKLLIYWASTRHTGVPD	K	A	S	P	K	L	3	0	0	1	0	4	0	2	0	0	0	2	0	0	2	2	1	1	1	2	0	0	21	1	2245.11	A0A140T8N5	A0A140T8N5	45	65			yes	yes	2;3	2.9148E-09	95.227	2	2	2	2
ASQDVSTAVAWYQQKPGQSPK	FMSTSVGDRVSITCKASQDVSTAVAWYQQK	TAVAWYQQKPGQSPKLLIYWASTRHTGVPD	K	A	S	P	K	L	3	0	0	1	0	4	0	1	0	0	0	2	0	0	2	3	1	1	1	2	0	0	21	1	2275.12	A0A140T8N7	A0A140T8N7	45	65			no	no	2	6.1294E-06	65.374				2
ASQEISGYLSWLQQKPDGTIK	SLSASLGERVSLTCRASQEISGYLSWLQQK	GYLSWLQQKPDGTIKRLIYAASTLDSGVPK	R	A	S	I	K	R	1	0	0	1	0	3	1	2	0	2	2	2	0	0	1	3	1	1	1	0	0	0	21	1	2348.2	A0A075B5K2;A0A0G2JDR3	A0A075B5K2	25	45	Igkv9-124		yes	no	3	2.8535E-07	68.639	2	2
ASQNVGTAVAWYQQK	FMSTSVGDRVSITCKASQNVGTAVAWYQQK	ASQNVGTAVAWYQQKPGQSPKLLIYSASNR	K	A	S	Q	K	P	3	0	1	0	0	3	0	1	0	0	0	1	0	0	0	1	1	1	1	2	0	0	15	0	1649.82	A0A075B5N7;A0A0G2JGY3	A0A075B5N7	25	39	Igkv6-13		yes	no	2;3	0.0014907	119.27				2
ASQNVGTAVAWYQQKPGQSPK	FMSTSVGDRVSITCKASQNVGTAVAWYQQK	TAVAWYQQKPGQSPKLLIYSASNRYTGVPD	K	A	S	P	K	L	3	0	1	0	0	4	0	2	0	0	0	2	0	0	2	2	1	1	1	2	0	0	21	1	2244.13	A0A075B5N7;A0A0G2JGY3	A0A075B5N7	25	45	Igkv6-13		yes	no	3;4	1.0398E-59	145.52	2	1	2	1	2
ASQNVGTNVAWYQQK	FMSTSVGDRVSVTCKASQNVGTNVAWYQQK	ASQNVGTNVAWYQQKPGQSPKALIYSASYR	K	A	S	Q	K	P	2	0	2	0	0	3	0	1	0	0	0	1	0	0	0	1	1	1	1	2	0	0	15	0	1692.82	A0A140T8M5	A0A140T8M5	45	59			yes	yes	2	0.0018432	106.16			2	2	1
ASQNVGTNVAWYQQKPGQSPK	FMSTSVGDRVSVTCKASQNVGTNVAWYQQK	TNVAWYQQKPGQSPKALIYSASYRYSGVPD	K	A	S	P	K	A	2	0	2	0	0	4	0	2	0	0	0	2	0	0	2	2	1	1	1	2	0	0	21	1	2287.13	A0A140T8M5	A0A140T8M5	45	65			yes	yes	3	2.274E-07	68.49	2	2	2	2	2
ASQRPDVLTTGGGNPIGDK	RDPASDQMKQWKEQRASQRPDVLTTGGGNP	PDVLTTGGGNPIGDKLNIMTAGSRGPLLVQ	R	A	S	D	K	L	1	1	1	2	0	1	0	4	0	1	1	1	0	0	2	1	2	0	0	1	0	0	19	1	1881.95	P24270;A2AL20	P24270	20	38	Cat	Catalase	yes	no	3	0.0096165	26.344				1	2
ASQSIGTSIHWYQQR	ILSVSPGERVSFSCRASQSIGTSIHWYQQR	ASQSIGTSIHWYQQRTNGSPRLLIKYASES	R	A	S	Q	R	T	1	1	0	0	0	3	0	1	1	2	0	0	0	0	0	3	1	1	1	0	0	0	15	0	1760.86	P01642	P01642	45	59	Gm10881	Ig kappa chain V-V region L7	yes	yes	2;3	0.00088336	98.105	1			3	2
ASQSISDYLHWYQQK	TLSVTPGDRVSLSCRASQSISDYLHWYQQK	ASQSISDYLHWYQQKSHESPRLLIKYASQS	R	A	S	Q	K	S	1	0	0	1	0	3	0	0	1	1	1	1	0	0	0	3	0	1	2	0	0	0	15	0	1852.87	A0A075B5M7;A0A0G2JDV4	A0A075B5M7	25	39	Igkv5-39		yes	no	2;3	2.8855E-13	125.97	1	2	2	4	2
ASQSISNNLHWYQQK	TLSVTPGDSVSLSCRASQSISNNLHWYQQK	ASQSISNNLHWYQQKSHESPRLLIKYASQS	R	A	S	Q	K	S	1	0	2	0	0	3	0	0	1	1	1	1	0	0	0	3	0	1	1	0	0	0	15	0	1802.87	A0A0B4J1J2	A0A0B4J1J2	45	59	Igkv5-43		yes	yes	2;3	0.0004608	86.014	1	2	2	3	2
ASQSISNYLHWYQQK	TLSVTPGDRVSLSCRASQSISNYLHWYQQK	ASQSISNYLHWYQQKSHESPRLLIKYASQS	R	A	S	Q	K	S	1	0	1	0	0	3	0	0	1	1	1	1	0	0	0	3	0	1	2	0	0	0	15	0	1851.89	A0A0B4J1J1	A0A0B4J1J1	45	59	Igkv5-45		yes	yes	2;3	2.0235E-05	106.11	2	2	3	2	2
ASQSVDYDGDSYMNWYQQKPGQPPK	SLAVSLGQRATISCKASQSVDYDGDSYMNW	SYMNWYQQKPGQPPKLLIYAASNLESGIPA	K	A	S	P	K	L	1	0	1	3	0	4	0	2	0	0	0	2	1	0	3	3	0	1	3	1	0	0	25	1	2888.27	P01666;P01665;A0A140T8Q4;P01669;P01667	P01666	25	49		Ig kappa chain V-III region PC 7183;Ig kappa chain V-III region PC 7043;Ig kappa chain V-III region PC 7769;Ig kappa chain V-III region PC 6308	yes	no	2;3	2.8399E-06	85.837		1	1	2	1
ASQSVSNDVAWYQQK	FLLVSAGDRVTITCKASQSVSNDVAWYQQK	ASQSVSNDVAWYQQKPGQSPKLLIYYASNR	K	A	S	Q	K	P	2	0	1	1	0	3	0	0	0	0	0	1	0	0	0	3	0	1	1	2	0	0	15	0	1709.8	A0A140T8N9	A0A140T8N9	45	59			yes	yes	2;3	0.0016748	73.781				2	2
ASQSVSNDVAWYQQKPGQSPK	FLLVSAGDRVTITCKASQSVSNDVAWYQQK	NDVAWYQQKPGQSPKLLIYYASNRYTGVPD	K	A	S	P	K	L	2	0	1	1	0	4	0	1	0	0	0	2	0	0	2	4	0	1	1	2	0	0	21	1	2304.11	A0A140T8N9	A0A140T8N9	45	65			yes	yes	2;3	5.5305E-12	114.88	2	1	2	3	1
ASQSVSTSSYSYMHWYQQK	SLAVSLGQRATISCRASQSVSTSSYSYMHW	VSTSSYSYMHWYQQKPGQPPKLLIKYASNL	R	A	S	Q	K	P	1	0	0	0	0	3	0	0	1	0	0	1	1	0	0	6	1	1	3	1	0	0	19	0	2267	A0A075B5N9;A0A0G2JE31	A0A075B5N9	25	43	Igkv3-7		yes	no	3	0.0018423	47.568					2
ASQSVSTSSYSYMHWYQQKPGQPPK	SLAVSLGQRATISCRASQSVSTSSYSYMHW	SYMHWYQQKPGQPPKLLIKYASNLESGVPA	R	A	S	P	K	L	1	0	0	0	0	4	0	1	1	0	0	2	1	0	3	6	1	1	3	1	0	0	25	1	2871.33	A0A075B5N9;A0A0G2JE31	A0A075B5N9	25	49	Igkv3-7		yes	no	4	1.4281E-07	52.909					1
ASREEILAQAK	QAQMKDCMRELDDTRASREEILAQAKENEK	DDTRASREEILAQAKENEKKLKSMEAEMIQ	R	A	S	A	K	E	3	1	0	0	0	1	2	0	0	1	1	1	0	0	0	1	0	0	0	0	0	0	11	1	1214.66	Q8VDD5	Q8VDD5	1659	1669	Myh9	Myosin-9	yes	yes	3	0.025223	38.634					1
ASSFYAQGK	QHLYVKDIKVDGQFRASSFYAQGKYGLSCE	VDGQFRASSFYAQGKYGLSCERDVTTGQLS	R	A	S	G	K	Y	2	0	0	0	0	1	0	1	0	0	0	1	0	1	0	2	0	0	1	0	0	0	9	0	957.456	E9Q414;E9Q1Y3	E9Q414	1492	1500	Apob	Apolipoprotein B-100;Apolipoprotein B-48	yes	no	2	0.029453	77.923			1
ASSLIEEAK	VQAIVLDTASDVLDKASSLIEEAKKASGHP	SDVLDKASSLIEEAKKASGHPGDPESQQRL	K	A	S	A	K	K	2	0	0	0	0	0	2	0	0	1	1	1	0	0	0	2	0	0	0	0	0	0	9	0	946.497	P26039	P26039	1162	1170	Tln1	Talin-1	yes	yes	2	0.030343	69.825					1
ASSLIEEAKK	VQAIVLDTASDVLDKASSLIEEAKKASGHP	DVLDKASSLIEEAKKASGHPGDPESQQRLA	K	A	S	K	K	A	2	0	0	0	0	0	2	0	0	1	1	2	0	0	0	2	0	0	0	0	0	0	10	1	1074.59	P26039	P26039	1162	1171	Tln1	Talin-1	yes	yes	3	0.02517	40.496					2
ASSPGQHESTYFGR	PDTGFTVNGQLIGNKASSPGQHESTYFGRL	KASSPGQHESTYFGRLGISSPTSDFQLEVT	K	A	S	G	R	L	1	1	0	0	0	1	1	2	1	0	0	0	0	1	1	3	1	0	1	0	0	0	14	0	1522.68	Q61702;F8WJ05	Q61702	715	728	Itih1	Inter-alpha-trypsin inhibitor heavy chain H1	yes	no	3	0.00052423	58.831	2	1	2	2
ASSSGATR	GGQTAPASIRLFQVRASSSGATRAVEVMPK	IRLFQVRASSSGATRAVEVMPKSGALNSND	R	A	S	T	R	A	2	1	0	0	0	0	0	1	0	0	0	0	0	0	0	3	1	0	0	0	0	0	8	0	735.351	P13020;A0A0J9YUQ8;CON__Q3SX14	P13020	568	575	Gsn	Gelsolin	yes	no	2	0.0012638	136.11	2	1	1	1
ASSSVSSSYLHWYQQK	IMSASPGEKVTMTCRASSSVSSSYLHWYQQ	SSSVSSSYLHWYQQKSGASPKLWIYSTSNL	R	A	S	Q	K	S	1	0	0	0	0	2	0	0	1	0	1	1	0	0	0	6	0	1	2	1	0	0	16	0	1856.87	A0A075B5M4	A0A075B5M4	47	62	Igkv4-57-1		yes	yes	2;3	3.5316000000000003E-35	145.91			2	3	2
ASSSYQR	TCFQAKAAPITQYLKASSSYQRNVCGALIK	APITQYLKASSSYQRNVCGALIKFGPKVLN	K	A	S	Q	R	N	1	1	0	0	0	1	0	0	0	0	0	0	0	0	0	3	0	0	1	0	0	0	7	0	797.367	O89020	O89020	215	221	Afm	Afamin	yes	yes	2	0.03795	76.833			1
ASVYTFTEYPMHWVK	PELKKPGETVKISCKASVYTFTEYPMHWVK	ASVYTFTEYPMHWVKQAPGKGFKWMGWINT	K	A	S	V	K	Q	1	0	0	0	0	0	1	0	1	0	0	1	1	1	1	1	2	1	2	2	0	0	15	0	1857.88	A0A0B4J1J4	A0A0B4J1J4	43	57	Ighv9-2		yes	yes	3	0.0011967	39.163	2
ATAEQLK	KKQTALAELVKHKPKATAEQLKTVMDDFAQ	ELVKHKPKATAEQLKTVMDDFAQFLDTCCK	K	A	T	L	K	T	2	0	0	0	0	1	1	0	0	0	1	1	0	0	0	0	1	0	0	0	0	0	7	0	759.413	P07724	P07724	563	569	Alb	Serum albumin	yes	yes	1;2	0.0068975	126.24	3	2	3	2	4
ATDLKDWVQETMAK	FDKSCAVAEYGVYVRATDLKDWVQETMAKN	RATDLKDWVQETMAKN______________	R	A	T	A	K	N	2	0	0	2	0	1	1	0	0	0	1	2	1	0	0	0	2	1	0	1	0	0	14	1	1634.8	Q61646	Q61646	333	346	Hp	Haptoglobin;Haptoglobin alpha chain;Haptoglobin beta chain	yes	yes	2;3	1.6200000000000001E-62	176.42				2
ATDLQLSDVFLK	IRIHKLIKVLNFTMKATDLQLSDVFLKALV	TMKATDLQLSDVFLKALVHLPLEYNSAVYS	K	A	T	L	K	A	1	0	0	2	0	1	0	0	0	0	3	1	0	1	0	1	1	0	0	1	0	0	12	0	1348.72	E9Q6D8;Q91X70	E9Q6D8	329	340	C6		yes	no	2	5.4934E-06	103.26			2		2
ATEEDGSEQK	IPVNPLCIYRSPGKKATEEDGSEQKVPEAT	SPGKKATEEDGSEQKVPEATNRRVWELSKA	K	A	T	Q	K	V	1	0	0	1	0	1	3	1	0	0	0	1	0	0	0	1	1	0	0	0	0	0	10	0	1092.46	P32261;A0A0A6YWH7;A0A0A6YX70	P32261	63	72	Serpinc1	Antithrombin-III	yes	no	2	1.1355E-113	207.95	5	5	5	6	6
ATEEDGSEQKVPEATNR	IPVNPLCIYRSPGKKATEEDGSEQKVPEAT	EEDGSEQKVPEATNRRVWELSKANSRFATN	K	A	T	N	R	R	2	1	1	1	0	1	4	1	0	0	0	1	0	0	1	1	2	0	0	1	0	0	17	1	1859.85	P32261;A0A0A6YWH7;A0A0A6YX70	P32261	63	79	Serpinc1	Antithrombin-III	yes	no	2;3;4	7.411900000000001E-270	227.63	5	3	7	4	4
ATEEDGSEQKVPEATNRR	IPVNPLCIYRSPGKKATEEDGSEQKVPEAT	EDGSEQKVPEATNRRVWELSKANSRFATNF	K	A	T	R	R	V	2	2	1	1	0	1	4	1	0	0	0	1	0	0	1	1	2	0	0	1	0	0	18	2	2015.95	P32261;A0A0A6YWH7;A0A0A6YX70	P32261	63	80	Serpinc1	Antithrombin-III	yes	no	4	0.00047197	74.12	1		1
ATEQPCTAATVPGGR	CYVYERLNMDFWRLRATEQPCTAATVPGGR	ATEQPCTAATVPGGRRDCSLPGGSVPTVAV	R	A	T	G	R	R	3	1	0	0	1	1	1	2	0	0	0	0	0	0	2	0	3	0	0	1	0	0	15	0	1457.69	Q9R216	Q9R216	481	495	Fzd9	Frizzled-9	yes	yes	4	0.017727	45.79		1
ATETQGVNLLFSSR	QLVAQSPWLRNTAFKATETQGVNLLFSSRR	KATETQGVNLLFSSRRGHIFVQTDQPIYNP	K	A	T	S	R	R	1	1	1	0	0	1	1	1	0	0	2	0	0	1	0	2	2	0	0	1	0	0	14	0	1521.78	P01029	P01029	122	135	C4b	Complement C4-B;Complement C4 beta chain;Complement C4 alpha chain;C4a anaphylatoxin;Complement C4 gamma chain	yes	yes	2;3	9.9013E-144	205.46	4	2	4	2	3
ATGVFTTLQPLR	TVTLVAVKGNQQSPKATGVFTTLQPLRSIP	SPKATGVFTTLQPLRSIPPYNTEVTETTIV	K	A	T	L	R	S	1	1	0	0	0	1	0	1	0	0	2	0	0	1	1	0	3	0	0	1	0	0	12	0	1302.73	A0A087WSN6;A0A087WR50;B9EHT6;P11276;Q3UHL6;B7ZNJ1;A0A087WS56	A0A087WSN6	1077	1088	Fn1	Fibronectin;Anastellin	yes	no	2;3	1.3264E-18	143.03	4	3	4	3	2
ATIDQNLEDLR	EELKGHLTPRANELKATIDQNLEDLRRSLA	NELKATIDQNLEDLRRSLAPLTVGVQEKLN	K	A	T	L	R	R	1	1	1	2	0	1	1	0	0	1	2	0	0	0	0	0	1	0	0	0	0	0	11	0	1286.65	P06728	P06728	210	220	Apoa4	Apolipoprotein A-IV	yes	yes	2	3.6E-12	136.57		2		2	1
ATIDQNLEDLRR	EELKGHLTPRANELKATIDQNLEDLRRSLA	ELKATIDQNLEDLRRSLAPLTVGVQEKLNH	K	A	T	R	R	S	1	2	1	2	0	1	1	0	0	1	2	0	0	0	0	0	1	0	0	0	0	0	12	1	1442.75	P06728	P06728	210	221	Apoa4	Apolipoprotein A-IV	yes	yes	2;3	5.61E-06	121.83	2	1	1	2	2
ATLTADK	PRSGNTYYNEKFKGKATLTADKSSSTAYME	YNEKFKGKATLTADKSSSTAYMELRSLTSE	K	A	T	D	K	S	2	0	0	1	0	0	0	0	0	0	1	1	0	0	0	0	2	0	0	0	0	0	7	0	718.386	A0A0B4J1M0;A0A0G2JGS9;A0A075B5X2;A0A075B674;A0A0G2JGN3;A0A075B5Y4;A0A0A6YVW3;A0A075B5T7;A0A075B5T4;A0A075B680;A0A0G2JFL3;A0A0A6YXZ4;A0A0B4J1J7;A0A0G2JEU7;A0A075B5Y3;P06327;A0A075B5W5	A0A075B5Y4	87	93	Ighv1-77;Ighv1-63;Ighv1-78;Ighv1-81;Ighv1-23;Ighv1-7;Ighv1-4;Ighv1-62-2;Ighv1-82;Ighv1-80;Gm5629;Ighv1-54	Ig heavy chain V region VH558 A1/A4	no	no	2	0.011126	104.76				1	1
ATLTVDK	PSTGGTTYNQKFKAKATLTVDKSSSTAYMQ	YNQKFKAKATLTVDKSSSTAYMQLKSLTSE	K	A	T	D	K	S	1	0	0	1	0	0	0	0	0	0	1	1	0	0	0	0	2	0	0	1	0	0	7	0	746.417	A0A075B5Y1;A0A0G2JGK2;P01750;A0A075B665;P06329;P03980;A0A075B5W2;A0A0A6YXC3;A0A075B5V6;A0A0A6YY38;A0A075B5V7;A0A0A6YXN5;A0A075B5U4;A0A0A6YXN4;A0A075B5V0;A0A075B5U6;A0A0A6YX66;A0A075B5V4;A0A0A6YW32;A0A075B5U5;A0A0A6YWX0;A0A075B5U0;A0A0A6YXJ9;A0A075B5W3;A0A075B5X3;A0A075B5Y2;P01749;P01754;P06328	A0A075B5V6	68	74	Ighv1-74;Ighv1-12;Ighv1-52;Ighv1-42;Ighv1-43;Ighv1-18;Ighv1-26;Ighv1-20;Ighv1-37;Ighv1-19;Ighv1-53;Ighv1-64;Ighv1-75;Ighv1-61;Ighv1-62-3	Ig heavy chain V region 102;Ig heavy chain V region AC38 15.3;Ig heavy chain V region TEPC 1017;Ig heavy chain V region 3;Ig heavy chain V region 1-62-3;Ig heavy chain V region VH558 B4	no	no	1;2	0.010882	116.88	1	2	1	1
ATLTVDKSSSTAYMELR	PNNGGTSYNQKFKGKATLTVDKSSSTAYME	LTVDKSSSTAYMELRSLTSEDSAVYYCAR_	K	A	T	L	R	S	2	1	0	1	0	0	1	0	0	0	2	1	1	0	0	3	3	0	1	1	0	0	17	1	1871.93	A0A075B5U4;A0A0A6YXN4;A0A075B5V0	A0A075B5V0	87	103	Ighv1-18;Ighv1-26		no	no	3	0.0085924	40.493					1
ATLYALSHAVNSYFDVDHSR	RLQEIFNTAKEQQSRATLYALSHAVNSYFD	LSHAVNSYFDVDHSRSPVLQDIAGYLLKQI	R	A	T	S	R	S	3	1	1	2	0	0	0	0	2	0	2	0	0	1	0	3	1	0	2	2	0	0	20	0	2265.08	E9Q414;E9Q1Y3	E9Q414	440	459	Apob	Apolipoprotein B-100;Apolipoprotein B-48	yes	no	3;4	2.3381E-93	171.85	3	3	4	2	2
ATPEPSGTPSSDTVSR	RELRVNRGLDSARRRATPEPSGTPSSDTVS	TPEPSGTPSSDTVSRLEEDVRNLNAIVQKL	R	A	T	S	R	L	1	1	0	1	0	0	1	1	0	0	0	0	0	0	3	4	3	0	0	1	0	0	16	0	1587.74	O89053	O89053	417	432	Coro1a	Coronin-1A	yes	yes	2	0.0092354	50.207				2	1
ATSENLVFYDENVDR	FKNQYEGENNYKLLKATSENLVFYDENVDR	ATSENLVFYDENVDRASRKTKLLYILGKGE	K	A	T	D	R	A	1	1	2	2	0	0	2	0	0	0	1	0	0	1	0	1	1	0	1	2	0	0	15	0	1770.81	A2BHD2;A2AEP0	A2BHD2	107	121	Gm14743;Obp1b		yes	no	2	0.011715	54.776					1
ATSNVFAMFDQSQIQEFK	SKRAKAKTTKKRPQRATSNVFAMFDQSQIQ	NVFAMFDQSQIQEFKEAFNMIDQNRDGFID	R	A	T	F	K	E	2	0	1	1	0	3	1	0	0	1	0	1	1	3	0	2	1	0	0	1	0	0	18	0	2089.98	Q9CQ19;D3YV37;D3Z249	Q9CQ19	18	35	Myl9;Myl12a	Myosin regulatory light polypeptide 9	no	no	2;3	7.568E-56	114.28		1	1	1	2
ATSQVVAGTK	ENDHPFYYKIDTVKKATSQVVAGTKYVIEF	DTVKKATSQVVAGTKYVIEFIARETKCSKE	K	A	T	T	K	Y	2	0	0	0	0	1	0	1	0	0	0	1	0	0	0	1	2	0	0	2	0	0	10	0	960.524	A0A0R4J038;D3YTY9;O08677	A0A0R4J038	306	315	Kng1	Kininogen-1;Kininogen-1 heavy chain;Bradykinin;Kininogen-1 light chain	yes	no	2	3.7086E-08	143.7	2	2	2	2	1
ATVFLAMGKSK	AVDGDPDNYIAYYRRATVFLAMGKSKAALP	YYRRATVFLAMGKSKAALPDLTKVIALKMD	R	A	T	S	K	A	2	0	0	0	0	0	0	1	0	0	1	2	1	1	0	1	1	0	0	1	0	0	11	1	1151.64	Q91YW3	Q91YW3	78	88	Dnajc3	DnaJ homolog subfamily C member 3	yes	yes	2	0.020088	46.129		1
ATVLYQGMR	FLPTCRESCKLPVKKATVLYQGMRVKIQEQ	KLPVKKATVLYQGMRVKIQEQFKNGMMHGD	K	A	T	M	R	V	1	1	0	0	0	1	0	1	0	0	1	0	1	0	0	0	1	0	1	1	0	0	9	0	1037.53	Q01339	Q01339	271	279	Apoh	Beta-2-glycoprotein 1	yes	yes	2	5.2721E-17	166.05	2	2	2	1	2
ATVMNYLPTSMR	SLPYSVVRGEAFMLKATVMNYLPTSMRMSV	MLKATVMNYLPTSMRMSVQLEASPDFTAVP	K	A	T	M	R	M	1	1	1	0	0	0	0	0	0	0	1	0	2	0	1	1	2	0	1	1	0	0	12	0	1382.67	P28666	P28666	814	825	Mug2	Murinoglobulin-2	yes	yes	2	6.6578000000000004E-49	162.36	2	2	2	1	1
ATYFGSIVLLSPTVINSPLK	LVGDKVPSDLDMLLRATYFGSIVLLSPTVI	SIVLLSPTVINSPLKLKLEATSPPRCTIKP	R	A	T	L	K	L	1	0	1	0	0	0	0	1	0	2	3	1	0	1	2	3	2	0	1	2	0	0	20	0	2119.19	P55065;A2A5K2	P55065	305	324	Pltp	Phospholipid transfer protein	yes	no	3	2.3769999999999997E-50	113.47		1
AVAEQIPLLVQGVR	KASAGPQPLLVQSCKAVAEQIPLLVQGVRG	KAVAEQIPLLVQGVRGSQAQPDSPSAQLAL	K	A	V	V	R	G	2	1	0	0	0	2	1	1	0	1	2	0	0	0	1	0	0	0	0	3	0	0	14	0	1491.88	P26039;F6S1V7	P26039	958	971	Tln1	Talin-1	yes	no	2;3	0.0001056	125.75	1	3	4		3
AVAGNISDPGLQK	DELSKTISPMVMDAKAVAGNISDPGLQKSF	AKAVAGNISDPGLQKSFLDSGYRILGAVAK	K	A	V	Q	K	S	2	0	1	1	0	1	0	2	0	1	1	1	0	0	1	1	0	0	0	1	0	0	13	0	1268.67	Q64727	Q64727	803	815	Vcl	Vinculin	yes	yes	2	0.023791	45.598					1
AVASAAAALVLK	DTDPHFQDVLMQLAKAVASAAAALVLKAKS	LAKAVASAAAALVLKAKSVAQRTEDSGLQT	K	A	V	L	K	A	6	0	0	0	0	0	0	0	0	0	2	1	0	0	0	1	0	0	0	2	0	0	12	0	1083.67	P26039	P26039	674	685	Tln1	Talin-1	yes	yes	2	8.5516E-05	98.033	2	2	2	2	2
AVDQSVLLLKPEDELSPSWIYNLPGMQHNK	RLQVTASPQSLCGLRAVDQSVLLLKPEDEL	SPSWIYNLPGMQHNKFIPSSSLSEDREDCI	R	A	V	N	K	F	1	0	2	2	0	2	2	1	1	1	5	2	1	0	3	3	0	1	1	2	0	0	30	1	3420.74	P28666	P28666	591	620	Mug2	Murinoglobulin-2	yes	yes	3;4	8.6533E-26	79.558	2	2	3	2
AVDQSVLLLKPESELSPSWIYNLPGMQQNK	RLQVTASPQSLCGLRAVDQSVLLLKPESEL	SPSWIYNLPGMQQNKFVPSSRLSEDQEDCI	R	A	V	N	K	F	1	0	2	1	0	3	2	1	0	1	5	2	1	0	3	4	0	1	1	2	0	0	30	1	3383.74	P28665	P28665	591	620	Mug1	Murinoglobulin-1	yes	yes	3;4	9.8324E-32	97.839	3	3	6	4	4
AVDQWSTETIASHEDIER	PKSELAVSSELDLLKAVDQWSTETIASHED	QWSTETIASHEDIERLVEQVRFPMMLPQEL	K	A	V	E	R	L	2	1	0	2	0	1	3	0	1	2	0	0	0	0	0	2	2	1	0	1	0	0	18	0	2085.96	Q07797	Q07797	324	341	Lgals3bp	Galectin-3-binding protein	yes	yes	2;3	2.9332E-20	128.26	2	2	2	2	3
AVEDEATK	KVMVTNVTSLLKTVKAVEDEATKGTRALEA	SLLKTVKAVEDEATKGTRALEATTEHIRQE	K	A	V	T	K	G	2	0	0	1	0	0	2	0	0	0	0	1	0	0	0	0	1	0	0	1	0	0	8	0	861.408	P26039	P26039	2134	2141	Tln1	Talin-1	yes	yes	2	0.03215	68.787					1
AVEDYIDEFSTK	LKIKDAYIKKQNLEKAVEDYIDEFSTKRCY	LEKAVEDYIDEFSTKRCYPCLNGGTIILLD	K	A	V	T	K	R	1	0	0	2	0	0	2	0	0	1	0	1	0	1	0	1	1	0	1	1	0	0	12	0	1415.65	P06683;A0A0R4J032	P06683	500	511	C9	Complement component C9	yes	no	2	2.797E-05	117.67	2		2	1
AVEDYIDEFSTKR	LKIKDAYIKKQNLEKAVEDYIDEFSTKRCY	EKAVEDYIDEFSTKRCYPCLNGGTIILLDG	K	A	V	K	R	C	1	1	0	2	0	0	2	0	0	1	0	1	0	1	0	1	1	0	1	1	0	0	13	1	1571.75	P06683;A0A0R4J032	P06683	500	512	C9	Complement component C9	yes	no	2;3	1.556E-05	101.53	2	2	3	2
AVFPSIVGR	SGMCKAGFAGDDAPRAVFPSIVGRPRHQGV	GDDAPRAVFPSIVGRPRHQGVMVGMGQKDS	R	A	V	G	R	P	1	1	0	0	0	0	0	1	0	1	0	0	0	1	1	1	0	0	0	2	0	0	9	0	944.544	P63260;P60710;E9Q5F4;G3UZ07;E9Q1F2;G3UYG0;E9Q606;B1ATY1;E9Q2D1;F6WX90;P68134;P68033;P63268;P62737;A0A494B9T3;D3YZY0;A0A1D5RM20;D3Z2K3	P63260	29	37	Actg1;Actb;Actc1;Acta1;Actg2;Acta2	Actin, cytoplasmic 2;Actin, cytoplasmic 2, N-terminally processed;Actin, cytoplasmic 1;Actin, cytoplasmic 1, N-terminally processed;Actin, alpha skeletal muscle;Actin, alpha cardiac muscle 1;Actin, gamma-enteric smooth muscle;Actin, aortic smooth muscle	no	no	2	0.0090899	100.19	1	2	1		1
AVFPSIVGRPR	SGMCKAGFAGDDAPRAVFPSIVGRPRHQGV	DAPRAVFPSIVGRPRHQGVMVGMGQKDSYV	R	A	V	P	R	H	1	2	0	0	0	0	0	1	0	1	0	0	0	1	2	1	0	0	0	2	0	0	11	1	1197.7	P63260;P60710;E9Q5F4;G3UZ07;E9Q1F2;G3UYG0;E9Q606;B1ATY1;E9Q2D1;F6WX90;P68134;P68033;P63268;P62737;A0A494B9T3;D3YZY0;A0A1D5RM20;D3Z2K3	P63260	29	39	Actg1;Actb;Actc1;Acta1;Actg2;Acta2	Actin, cytoplasmic 2;Actin, cytoplasmic 2, N-terminally processed;Actin, cytoplasmic 1;Actin, cytoplasmic 1, N-terminally processed;Actin, alpha skeletal muscle;Actin, alpha cardiac muscle 1;Actin, gamma-enteric smooth muscle;Actin, aortic smooth muscle	no	no	3	0.0004092	98.943		2	2	2
AVFVDLEPTVIDEVR	NTFFSETGAGKHVPRAVFVDLEPTVIDEVR	AVFVDLEPTVIDEVRTGTYRQLFHPEQLIT	R	A	V	V	R	T	1	1	0	2	0	0	2	0	0	1	1	0	0	1	1	0	1	0	0	4	0	0	15	0	1700.9	P68373;P68369;P05213;A0A2R8VHF3	P68373	65	79	Tuba1c;Tuba1a;Tuba1b	Tubulin alpha-1C chain;Tubulin alpha-1A chain;Tubulin alpha-1B chain	yes	no	2;3	5.652E-07	108.7	3	2	1	2	4
AVIQWIR	PLPDNWKSQVEPETRAVIQWIRSLNFVLSA	SQVEPETRAVIQWIRSLNFVLSANMHGGAV	R	A	V	I	R	S	1	1	0	0	0	1	0	0	0	2	0	0	0	0	0	0	0	1	0	1	0	0	7	0	884.523	Q9JJN5	Q9JJN5	199	205	Cpn1	Carboxypeptidase N catalytic chain	yes	yes	2	0.0070327	126.05	2	1	1	2	2
AVLDVAETGTEAAAATGVIGGIR	ITETKKLSVSQVVHKAVLDVAETGTEAAAA	GTEAAAATGVIGGIRKAILPAVHFNRPFLF	K	A	V	I	R	K	6	1	0	1	0	0	2	4	0	2	1	0	0	0	0	0	3	0	0	3	0	0	23	0	2141.13	A0A0R4J0I1;P07759	P07759	361	383	Serpina3k	Serine protease inhibitor A3K	no	no	2;3;4	0	275.18	5	5	11	4	4
AVLDVAETGTEAAAATGVIGGIRK	ITETKKLSVSQVVHKAVLDVAETGTEAAAA	TEAAAATGVIGGIRKAILPAVHFNRPFLFV	K	A	V	R	K	A	6	1	0	1	0	0	2	4	0	2	1	1	0	0	0	0	3	0	0	3	0	0	24	1	2269.23	A0A0R4J0I1;P07759	P07759	361	384	Serpina3k	Serine protease inhibitor A3K	no	no	3	7.4483E-54	106.43	2	2	2	1
AVLDVAETGTEAAAATGVK	ITGTKDLRVSQVVHKAVLDVAETGTEAAAA	VAETGTEAAAATGVKFVPMSAKLYPLTVYF	K	A	V	V	K	F	6	0	0	1	0	0	2	2	0	0	1	1	0	0	0	0	3	0	0	3	0	0	19	0	1772.92	Q91WP6;G3X8T9	Q91WP6	359	377	Serpina3n	Serine protease inhibitor A3N	yes	no	2;3	1.7215E-149	244.58	4	4	3	4	3
AVLFNYR	RLPYSVVRNEQVEIRAVLFNYREQEELKVR	RNEQVEIRAVLFNYREQEELKVRVELLHNP	R	A	V	Y	R	E	1	1	1	0	0	0	0	0	0	0	1	0	0	1	0	0	0	0	1	1	0	0	7	0	881.476	P01027	P01027	849	855	C3	Complement C3;Complement C3 beta chain;C3-beta-c;Complement C3 alpha chain;C3a anaphylatoxin;Acylation stimulating protein;Complement C3b alpha chain;Complement C3c alpha chain fragment 1;Complement C3dg fragment;Complement C3g fragment;Complement C3d fragment;Complement C3f fragment;Complement C3c alpha chain fragment 2	yes	yes	2	0.0039305	130.84	1	1	1	2	1
AVLFNYREQEELK	RLPYSVVRNEQVEIRAVLFNYREQEELKVR	IRAVLFNYREQEELKVRVELLHNPAFCSMA	R	A	V	L	K	V	1	1	1	0	0	1	3	0	0	0	2	1	0	1	0	0	0	0	1	1	0	0	13	1	1637.84	P01027	P01027	849	861	C3	Complement C3;Complement C3 beta chain;C3-beta-c;Complement C3 alpha chain;C3a anaphylatoxin;Acylation stimulating protein;Complement C3b alpha chain;Complement C3c alpha chain fragment 1;Complement C3dg fragment;Complement C3g fragment;Complement C3d fragment;Complement C3f fragment;Complement C3c alpha chain fragment 2	yes	yes	3	0.002193	62.694	2		2		1
AVLTIDETGTEAAAATVFEAVPMSMPPILR	TEENAPLKLSKAVHKAVLTIDETGTEAAAA	TVFEAVPMSMPPILRFDHPFLFIIFEEHTQ	K	A	V	L	R	F	6	1	0	1	0	0	3	1	0	2	2	0	2	1	3	1	4	0	0	3	0	0	30	0	3100.58	P22599	P22599	355	384	Serpina1b	Alpha-1-antitrypsin 1-2	yes	yes	3;4	1.8786E-143	162.41	5	5	4	1	2
AVLTIDETGTEAAAVTVLLAVPYSMPPILR	TEENAPLKLSQAVHKAVLTIDETGTEAAAV	TVLLAVPYSMPPILRFDHPFLFIIFEEHTQ	K	A	V	L	R	F	5	1	0	1	0	0	2	1	0	2	4	0	1	0	3	1	4	0	1	4	0	0	30	0	3110.69	Q00896	Q00896	355	384	Serpina1c	Alpha-1-antitrypsin 1-3	yes	yes	3;4	8.3391E-26	73.676	2	3	3
AVLTIDETGTEAAAVTVLQMVPMSMPPILR	TEENAPLKLSQAVHKAVLTIDETGTEAAAV	TVLQMVPMSMPPILRFDHPFLFIIFEEHTQ	K	A	V	L	R	F	4	1	0	1	0	1	2	1	0	2	3	0	3	0	3	1	4	0	0	4	0	0	30	0	3153.65	P07758;A0A0A0MQA3	P07758	355	384	Serpina1a	Alpha-1-antitrypsin 1-1	yes	no	3;4	3.884E-39	109.19	3	2	3
AVLVDLEPGTMDSIR	SVYYNEAYGKKYVPRAVLVDLEPGTMDSIR	AVLVDLEPGTMDSIRSSRLGVLFQPDSFVH	R	A	V	I	R	S	1	1	0	2	0	0	1	1	0	1	2	0	1	0	1	1	1	0	0	2	0	0	15	0	1614.83	A2AQ07;CON__ENSEMBL:ENSBTAP00000025008	A2AQ07	63	77	Tubb1	Tubulin beta-1 chain	yes	no	2;3	3.2521E-11	119.27	3	2	3		3
AVLVDLEPGTMDSVR	NVYYNEATGGKYVPRAVLVDLEPGTMDSVR	AVLVDLEPGTMDSVRSGPFGQIFRPDNFVF	R	A	V	V	R	S	1	1	0	2	0	0	1	1	0	0	2	0	1	0	1	1	1	0	0	3	0	0	15	0	1600.81	P68372	P68372	63	77	Tubb4b	Tubulin beta-4B chain	no	no	2;3	2.7588E-08	144.1	1	1	1	2	3
AVMVSFQSGYLFIQTDK	YVTVVANFGETVVEKAVMVSFQSGYLFIQT	MVSFQSGYLFIQTDKTIYTPGSTVLYRIFT	K	A	V	D	K	T	1	0	0	1	0	2	0	1	0	1	1	1	1	2	0	2	1	0	1	2	0	0	17	0	1932.97	P01027	P01027	121	137	C3	Complement C3;Complement C3 beta chain;C3-beta-c;Complement C3 alpha chain;C3a anaphylatoxin;Acylation stimulating protein;Complement C3b alpha chain;Complement C3c alpha chain fragment 1;Complement C3dg fragment;Complement C3g fragment;Complement C3d fragment;Complement C3f fragment;Complement C3c alpha chain fragment 2	yes	yes	2;3	1.518E-25	173.76	7	5	5	9	6
AVPPNNSNAAEVDLPTEELQGLVPR	______________________________	EVDLPTEELQGLVPRGVNLKDYLNVTAVHL	R	A	V	P	R	G	3	1	3	1	0	1	3	1	0	0	3	0	0	0	4	1	1	0	0	3	0	0	25	0	2629.33	Q8BH61	Q8BH61	14	38	F13a1	Coagulation factor XIII A chain	yes	yes	3	1.7365E-12	64.589				2	1
AVSSFFSGSCVPCADPVAFPK	LLFCKLSEPRSPLEKAVSSFFSGSCVPCAD	SGSCVPCADPVAFPKLCQLCPGCGCSSTQP	K	A	V	P	K	L	3	0	0	1	2	0	0	1	0	0	0	1	0	3	3	4	0	0	0	3	0	0	21	0	2114.98	Q921I1;D3YYR8	Q921I1	168	188	Tf;Trf	Serotransferrin	yes	no	2	0.039036	64.224				1
AVTELNEPLSNEDR	AEQAERYDDMASAMKAVTELNEPLSNEDRN	KAVTELNEPLSNEDRNLLSVAYKNVVGARR	K	A	V	D	R	N	1	1	2	1	0	0	3	0	0	0	2	0	0	0	1	1	1	0	0	1	0	0	14	0	1585.76	P68510	P68510	29	42	Ywhah	14-3-3 protein eta	yes	yes	2	0.020499	42.001					1
AVTHVGMDESEIIFVDWK	KRPDITPELREVFQKAVTHVGMDESEIIFV	HVGMDESEIIFVDWKKDRCGQQEKKQLELG	K	A	V	W	K	K	1	0	0	2	0	0	2	1	1	2	0	1	1	1	0	1	1	1	0	3	0	0	18	0	2075	Q60590;J3JRU4;Q63805;P07361	Q60590	163	180	Orm1;Orm3;Orm2	Alpha-1-acid glycoprotein 1;Alpha-1-acid glycoprotein;Alpha-1-acid glycoprotein 3;Alpha-1-acid glycoprotein 2	no	no	2;3	1.0462E-25	133.71	2	4	3	8	7
AVTHVGMDESEIIFVDWKK	KRPDITPELREVFQKAVTHVGMDESEIIFV	VGMDESEIIFVDWKKDRCGQQEKKQLELGK	K	A	V	K	K	D	1	0	0	2	0	0	2	1	1	2	0	2	1	1	0	1	1	1	0	3	0	0	19	1	2203.1	Q60590;J3JRU4;Q63805;P07361	Q60590	163	181	Orm1;Orm3;Orm2	Alpha-1-acid glycoprotein 1;Alpha-1-acid glycoprotein;Alpha-1-acid glycoprotein 3;Alpha-1-acid glycoprotein 2	no	no	4	0.00034771	53.278		1	1	1	1
AVTPLYPANQADIIFDITEGNLR	TFREFTRPEEIIFLRAVTPLYPANQADIIF	NQADIIFDITEGNLRDSFDIIKRYEDGMTV	R	A	V	L	R	D	3	1	2	2	0	1	1	1	0	3	2	0	0	1	2	0	2	0	1	1	0	0	23	0	2530.31	Q08879	Q08879	622	644	Fbln1	Fibulin-1	yes	yes	3	3.5417E-08	68.369		2
AVTPQAVSCQLSDWYK	PGVTAQEKVNQRVTRAVTPQAVSCQLSDWY	VTPQAVSCQLSDWYKWTDCFPCQDKKYRYR	R	A	V	Y	K	W	2	0	0	1	1	2	0	0	0	0	1	1	0	0	1	2	1	1	1	2	0	0	16	0	1794.86	Q8K182;A2A997	Q8K182	31	46	C8a	Complement component C8 alpha chain	yes	no	2	0.030787	48.004			1
AVTQALNR	PGDPESQQRLAQVAKAVTQALNRCVSCLPG	RLAQVAKAVTQALNRCVSCLPGQRDVDNAL	K	A	V	N	R	C	2	1	1	0	0	1	0	0	0	0	1	0	0	0	0	0	1	0	0	1	0	0	8	0	871.488	P26039	P26039	1191	1198	Tln1	Talin-1	yes	yes	2	0.0095117	100.74		1	1		1
AWAYYSAVNVER	ATKRSGPENPGSACRAWAYYSAVNVERDIH	ACRAWAYYSAVNVERDIHSGLIGPLLICRK	R	A	W	E	R	D	3	1	1	0	0	0	1	0	0	0	0	0	0	0	0	1	0	1	2	2	0	0	12	0	1427.68	O88783	O88783	1687	1698	F5	Coagulation factor V;Coagulation factor V heavy chain;Coagulation factor V light chain	yes	yes	2	3.1145E-05	101.65	1	2		2	1
AWFSEAFGK	AIEHIKQKEILTKTRAWFSEAFGKVKEKLK	ILTKTRAWFSEAFGKVKEKLKTTFS_____	R	A	W	G	K	V	2	0	0	0	0	0	1	1	0	0	0	1	0	2	0	1	0	1	0	0	0	0	9	0	1041.49	P34928	P34928	70	78	Apoc1	Apolipoprotein C-I;Truncated apolipoprotein C-I	yes	yes	1;2	7.4939E-33	178.83	2	2	2	2	1
AWLMSDKTDLEAK	SVGGLGDSFYEYLLKAWLMSDKTDLEAKKM	LKAWLMSDKTDLEAKKMYFDAVQAIETHLI	K	A	W	A	K	K	2	0	0	2	0	0	1	0	0	0	2	2	1	0	0	1	1	1	0	0	0	0	13	1	1506.74	A0A1W2P788;P45700	A0A1W2P788	515	527	Man1a1	Mannosyl-oligosaccharide 1,2-alpha-mannosidase IA	yes	no	3	0.011859	47.915	2
AYFEKTHEQLTPLVR	LMEKAKTSEIQSQAKAYFEKTHEQLTPLVR	AYFEKTHEQLTPLVRSAGTSLVNFFSSLMN	K	A	Y	V	R	S	1	1	0	0	0	1	2	0	1	0	2	1	0	1	1	0	2	0	1	1	0	0	15	1	1830.96	P09813	P09813	63	77	Apoa2	Apolipoprotein A-II;Proapolipoprotein A-II	yes	yes	2;3;4	1.0051E-09	114.64	3	1	2		1
AYGPGIEPTGNMVK	PGAPLRPKLNPKKARAYGPGIEPTGNMVKK	RAYGPGIEPTGNMVKKRAEFTVETRSAGQG	R	A	Y	V	K	K	1	0	1	0	0	0	1	3	0	1	0	1	1	0	2	0	1	0	1	1	0	0	14	0	1432.7	B7FAV1;B7FAU9;Q8BTM8;F6XC15	B7FAV1	262	275	Flna	Filamin-A	yes	no	2	0.0038505	59.542		1			2
AYLPVNESFGFTADLR	FEESQVAGTPMFVVKAYLPVNESFGFTADL	YLPVNESFGFTADLRSNTGGQAFPQCVFDH	K	A	Y	L	R	S	2	1	1	1	0	0	1	1	0	0	2	0	0	2	1	1	1	0	1	1	0	0	16	0	1798.89	P58252	P58252	786	801	Eef2	Elongation factor 2	yes	yes	2	0.030202	53.528				2
AYLVSNEPMEGAFNYVQTR	QVTVETQYRECMVIKAYLVSNEPMEGAFNY	SNEPMEGAFNYVQTRCLCNDHPIRFFWDII	K	A	Y	T	R	C	2	1	2	0	0	1	2	1	0	0	1	0	1	1	1	1	1	0	2	2	0	0	19	0	2188.03	P02816;A0A0N4SV85	P02816	70	88	Pip	Prolactin-inducible protein homolog	yes	no	3	2.5431E-05	76.061	1		2
AYNLNEER	SLDNEWKEWKTKFAKAYNLNEERHRRLVWE	WKTKFAKAYNLNEERHRRLVWEENKKKIEA	K	A	Y	E	R	H	1	1	2	0	0	0	2	0	0	0	1	0	0	0	0	0	0	0	1	0	0	0	8	0	1007.47	P12399;A0A286YDF0	P12399	50	57	Ctla2a	Protein CTLA-2-alpha	yes	no	2	0.0025674	121.99	1	1	2	2	2
AYVAFPDFFR	VDPSLGWDHQVEQYRAYVAFPDFFRNSTAT	VEQYRAYVAFPDFFRNSTATWWKKEIKELH	R	A	Y	F	R	N	2	1	0	1	0	0	0	0	0	0	0	0	0	3	1	0	0	0	1	1	0	0	10	0	1231.6	A0A0J9YVJ0;A0A0J9YVE6;B5THE2;A0A571BF69	A0A0J9YVJ0	606	615	Mgam		yes	no	2	0.01049	72.547	2	1	2
CCAEANPPACYGTVLAEFQPLVEEPK	LLLRLAKKYEATLEKCCAEANPPACYGTVL	GTVLAEFQPLVEEPKNLVKTNCDLYEKLGE	K	C	C	P	K	N	4	0	1	0	3	1	4	1	0	0	2	1	0	1	4	0	1	0	1	2	0	0	26	0	2778.27	P07724	P07724	384	409	Alb	Serum albumin	yes	yes	2	0.017691	43.791		1
CLPVTELENGR	ADGWINDIPLCEVVKCLPVTELENGRIVSG	EVVKCLPVTELENGRIVSGAAETDQEYYFG	K	C	L	G	R	I	0	1	1	0	1	0	2	1	0	0	2	0	0	0	1	0	1	0	0	1	0	0	11	0	1229.61	E9Q8I0;P06909;D6RGQ0;E9Q8H9;A0A0A6YVP8	E9Q8I0	164	174	Cfh	Complement factor H	yes	no	2	0.0042214	77.677			1
CNLLAEK	AATDCTAKEVTDPAKCNLLAEKQHGFCKAN	KEVTDPAKCNLLAEKQHGFCKANLMHNLGG	K	C	N	E	K	Q	1	0	1	0	1	0	1	0	0	0	2	1	0	0	0	0	0	0	0	0	0	0	7	0	789.405	P29699;A0A338P703;A0A338P7G1;A0A338P7H5;A0A338P692;CON__P12763	P29699	219	225	Ahsg	Alpha-2-HS-glycoprotein	yes	no	2	0.039494	79.469		1
CQPVISKSLEK	WHKELYDWRLGTWDRCQPVISKSLEKSREC	TWDRCQPVISKSLEKSRECVKGEEGIQVRE	R	C	Q	E	K	S	0	0	0	0	1	1	1	0	0	1	1	2	0	0	1	2	0	0	0	1	0	0	11	1	1230.66	E9PWD2;E9QNR5;Q69ZU6	E9PWD2	121	131	Thsd7a	Thrombospondin type-1 domain-containing protein 7A	yes	no	3	0.024331	42.001
CSYDEHAK	FKGLVLIAFSQYLQKCSYDEHAKLVQEVTD	FSQYLQKCSYDEHAKLVQEVTDFAKTCVAD	K	C	S	A	K	L	1	0	0	1	1	0	1	0	1	0	0	1	0	0	0	1	0	0	1	0	0	0	8	0	951.376	P07724	P07724	58	65	Alb	Serum albumin	yes	yes	2;3	0.017737	81.119	3	1	2	1	1
CTPTGWIPVPR	CNYGFYPVTGSTVSKCTPTGWIPVPRCTLK	TVSKCTPTGWIPVPRCTLKPCEFPQFKYGR	K	C	T	P	R	C	0	1	0	0	1	0	0	1	0	1	0	0	0	0	3	0	2	1	0	1	0	0	11	0	1225.63	E9Q8I0;P06909;D6RGQ0;E9Q8H9;A0A0A6YVP8;Q61405;Q4LDF6	E9Q8I0	327	337	Cfh;Cfhr2	Complement factor H	no	no	2	0.014602	57.598					1
CVATDQLEK	GSVSCISGKWTQLPKCVATDQLEKCRVLKS	WTQLPKCVATDQLEKCRVLKSTGIEAIKPK	K	C	V	E	K	C	1	0	0	1	1	1	1	0	0	0	1	1	0	0	0	0	1	0	0	1	0	0	9	0	1005.48	E9Q8I0;P06909;D6RGQ0;E9Q8H9;A0A0A6YWP4;E9PUM5;E9Q8B6;E9Q8B5	E9Q8I0	761	769	Cfh;Gm4788	Complement factor H	no	no	2	0.014073	84.916					2
DAALMVTNDGATILK	LGPKGMDKILLSSGRDAALMVTNDGATILK	DAALMVTNDGATILKNIGVDNPAAKVLVDM	R	D	A	L	K	N	3	0	1	2	0	0	0	1	0	1	2	1	1	0	0	0	2	0	0	1	0	0	15	0	1531.79	P80314;A0A1W2P7B7;A0A1W2P871;A0A1W2P828;A0A1W2P6Q3	P80314	58	72	Cct2	T-complex protein 1 subunit beta	yes	no	2	0.027641	56.205			1
DAEMPATEK	______________________________	______________________________	-	D	A	E	K	D	2	0	0	1	0	0	2	0	0	0	0	1	1	0	1	0	1	0	0	0	0	0	9	0	990.433	B7FAV1;B7FAU9;Q8BTM8;F6XC15	B7FAV1	1	9	Flna	Filamin-A	yes	no	2	0.012433	80.165		1	2		2
DAEMPATEKDLAEDAPWK	______________________________	MPATEKDLAEDAPWKKIQQNTFTRWCNEHL	-	D	A	W	K	K	4	0	0	3	0	0	3	0	0	0	1	2	1	0	2	0	1	1	0	0	0	0	18	1	2015.91	B7FAV1;B7FAU9;Q8BTM8;F6XC15	B7FAV1	1	18	Flna	Filamin-A	yes	no	3	0.038504	23.683					1
DAETEQGPTHGHGWLHEK	RTVSPPYIAREQEERDAETEQGPTHGHGWL	TEQGPTHGHGWLHEKQIKANKNHRGHKHGH	R	D	A	E	K	Q	1	0	0	1	0	1	3	3	3	0	1	1	0	0	1	0	2	1	0	0	0	0	18	0	2027.91	A0A0R4J038;O08677	A0A0R4J038	414	431	Kng1	Kininogen-1;Kininogen-1 heavy chain;Bradykinin;Kininogen-1 light chain	yes	no	3;4	2.0809E-05	98.035	2	2	3	2	3
DAGDREYWQLLR	QASLSGPYLTSVLGKDAGDREYWQLLRAPD	LGKDAGDREYWQLLRAPDTPLLQGIADYKP	K	D	A	L	R	A	1	2	0	2	0	1	1	1	0	0	2	0	0	0	0	0	0	1	1	0	0	0	12	1	1520.74	O88968	O88968	391	402	Tcn2	Transcobalamin-2	yes	yes	3	0.00014606	119.45	2	1	2	2	2
DAGEGGLSLAIEGPSK	HGVVNKPATFTVNTKDAGEGGLSLAIEGPS	AGEGGLSLAIEGPSKAEISCTDNQDGTCSV	K	D	A	S	K	A	2	0	0	1	0	0	2	4	0	1	2	1	0	0	1	2	0	0	0	0	0	0	16	0	1499.75	B7FAV1;B7FAU9;Q8BTM8	B7FAV1	1828	1843	Flna	Filamin-A	yes	no	2	0.0028476	88.441				2	2
DAGEGLLAVQITDPEGKPK	GVPASLPVEFTIDAKDAGEGLLAVQITDPE	GLLAVQITDPEGKPKKTHIQDNHDGTYTVA	K	D	A	P	K	K	2	0	0	2	0	1	2	3	0	1	2	2	0	0	2	0	1	0	0	1	0	0	19	1	1937.01	B7FAV1;B7FAU9;Q8BTM8	B7FAV1	1550	1568	Flna	Filamin-A	yes	no	3	9.4723E-06	70.942			2		2
DAGPLLISLK	GPDPALTAEEWLGGRDAGPLLISLKDGYVP	WLGGRDAGPLLISLKDGYVPPKSRELRVNR	R	D	A	L	K	D	1	0	0	1	0	0	0	1	0	1	3	1	0	0	1	1	0	0	0	0	0	0	10	0	1025.61	O89053	O89053	384	393	Coro1a	Coronin-1A	yes	yes	2	0.018493	62.463		1	2	1
DAGTIAGLNVLR	TVPAYFNDSQRQATKDAGTIAGLNVLRIIN	ATKDAGTIAGLNVLRIINEPTAAAIAYGLD	K	D	A	L	R	I	2	1	1	1	0	0	0	2	0	1	2	0	0	0	0	0	1	0	0	1	0	0	12	0	1198.67	P63017;Q504P4	P63017	160	171	Hspa8	Heat shock cognate 71 kDa protein	yes	no	2	0.00015313	87.308					1
DAGTIAGLNVMR	TVPAYFNDAQRQATKDAGTIAGLNVMRIIN	ATKDAGTIAGLNVMRIINEPTAAAIAYGLD	K	D	A	M	R	I	2	1	1	1	0	0	0	2	0	1	1	0	1	0	0	0	1	0	0	1	0	0	12	0	1216.62	P20029	P20029	187	198	Hspa5	78 kDa glucose-regulated protein	yes	yes	2	9.4994E-20	147.51	2	1	2	2	2
DAGVSTYMYEFR	IFFGIPAVLLSRSLRDAGVSTYMYEFRYRP	SLRDAGVSTYMYEFRYRPSFVSDKRPQTVE	R	D	A	F	R	Y	1	1	0	1	0	0	1	1	0	0	0	0	1	1	0	1	1	0	2	1	0	0	12	0	1437.62	D3Z5G7;P23953	P23953	426	437	Ces1b;Ces1c	Carboxylic ester hydrolase;Carboxylesterase 1C	no	no	2	4.1377E-20	150.61	2	2	2	2	2
DAILYYVNLK	QGGKVLKIHGFSPTRDAILYYVNLKELDNP	FSPTRDAILYYVNLKELDNPGPFTCRYRMH	R	D	A	L	K	E	1	0	1	1	0	0	0	0	0	1	2	1	0	0	0	0	0	0	2	1	0	0	10	0	1210.66	Q19LI2;A0A2I3BQV2	Q19LI2	273	282	A1bg	Alpha-1B-glycoprotein	yes	no	2	0.0027478	117.1	2	2
DALMISLTPK	ILGGPSVFIFPPKPKDALMISLTPKVTCVV	PPKPKDALMISLTPKVTCVVVDVSEDDPDV	K	D	A	P	K	V	1	0	0	1	0	0	0	0	0	1	2	1	1	0	1	1	1	0	0	0	0	0	10	0	1087.59	A0A075B5P5;A0A1Y7VJN6;P03987	A0A075B5P5	132	141	Ighg3	Ig gamma-3 chain C region	yes	no	2	3.4616E-08	144.09	2	2	2	2	2
DALPPQIYSPNDR	HLTRTVTVKVVGSPKDALPPQIYSPNDRVV	PKDALPPQIYSPNDRVVYEKEPGEELVIPC	K	D	A	D	R	V	1	1	1	2	0	1	0	0	0	1	1	0	0	0	3	1	0	0	1	0	0	0	13	0	1484.73	Q61730;E9Q6I2;G3UY13	Q61730	239	251	Il1rap	Interleukin-1 receptor accessory protein	yes	no	2	0.00060923	80.763	2	1	2	1	1
DAMLENQTPELFQDVNKPK	LGPVGGVFNLAMVLRDAMLENQTPELFQDV	ENQTPELFQDVNKPKYNGTLNLDRATREAC	R	D	A	P	K	Y	1	0	2	2	0	2	2	0	0	0	2	2	1	1	2	0	1	0	0	1	0	0	19	1	2216.08	P19096;A0A0U1RNJ1	P19096	1970	1988	Fasn	Fatty acid synthase;[Acyl-carrier-protein] S-acetyltransferase;[Acyl-carrier-protein] S-malonyltransferase;3-oxoacyl-[acyl-carrier-protein] synthase;3-oxoacyl-[acyl-carrier-protein] reductase;3-hydroxyacyl-[acyl-carrier-protein] dehydratase;Enoyl-[acyl-carrier-protein] reductase;Oleoyl-[acyl-carrier-protein] hydrolase	yes	no	3	0.034624	32.858					1
DAPDGPTVVLTVDGR	LTLSAPPWKDSKKFKDAPDGPTVVLTVDGR	DAPDGPTVVLTVDGRLCHFPFQYHRQLHHK	K	D	A	G	R	L	1	1	0	3	0	0	0	2	0	0	1	0	0	0	2	0	2	0	0	3	0	0	15	0	1510.76	Q80YC5	Q80YC5	31	45	F12	Coagulation factor XII;Coagulation factor XIIa heavy chain;Coagulation factor XIIa light chain	yes	yes	2;3	2.5001E-08	114.82	2	3	3	2	2
DAPHVEPDFSSQK	RESATEQYNTNALQRDAPHVEPDFSSQKLQ	QRDAPHVEPDFSSQKLQHLEHVMENYTQWL	R	D	A	Q	K	L	1	0	0	2	0	1	1	0	1	0	0	1	0	1	2	2	0	0	0	1	0	0	13	0	1455.66	O08538	O08538	70	82	Angpt1	Angiopoietin-1	yes	yes	2;3	3.6203E-05	92.039	2	3	4	2	2
DAPIVNR	EYTYTIQVLRDGQERDAPIVNRVVTPLSPP	VLRDGQERDAPIVNRVVTPLSPPTNLHLEA	R	D	A	N	R	V	1	1	1	1	0	0	0	0	0	1	0	0	0	0	1	0	0	0	0	1	0	0	7	0	783.424	A0A087WSN6;A0A087WR50;B9EHT6;P11276;Q3UHL6;B7ZNJ1;A0A087WS56	A0A087WSN6	1162	1168	Fn1	Fibronectin;Anastellin	yes	no	2	0.0098161	110.54				2
DAQLFIQK	EERKRLCENIAGHLKDAQLFIQKKAVKNFT	NIAGHLKDAQLFIQKKAVKNFTDVHPDYGA	K	D	A	Q	K	K	1	0	0	1	0	2	0	0	0	1	1	1	0	1	0	0	0	0	0	0	0	0	8	0	961.523	P24270;A2AL20	P24270	469	476	Cat	Catalase	yes	no	2	0.023132	94.407	2	1		2	1
DASEVVTPR	CERDATKAQGYEKVKDASEVVTPRFLCTGG	GYEKVKDASEVVTPRFLCTGGVDPYADPNT	K	D	A	P	R	F	1	1	0	1	0	0	1	0	0	0	0	0	0	0	1	1	1	0	0	2	0	0	9	0	972.488	B8JJN0;F6VQX8;B8JJM5;P04186;H3BK95;F6W2T4;B8JJM3	B8JJN0	1183	1191	Gm20547;Cfb	Complement factor B;Complement factor B Ba fragment;Complement factor B Bb fragment	yes	no	2	2.5845E-17	151.04	2	2	2	2	2
DATNVGDEGGFAPNILENK	VYHNLKNVIKEKYGKDATNVGDEGGFAPNI	VGDEGGFAPNILENKEALELLKTAIAKAGY	K	D	A	N	K	E	2	0	3	2	0	0	2	3	0	1	1	1	0	1	1	0	1	0	0	1	0	0	19	0	1959.92	P17182;Q6PHC1;B0QZL1	P17182	203	221	Eno1	Alpha-enolase;Enolase	yes	no	2;3	3.4261E-92	161.04	2	2		3	2
DATSHVLTDLEPGQEYTVLLIAEK	YSLPTGQSMEVQLPKDATSHVLTDLEPGQE	LEPGQEYTVLLIAEKGRHKSKPARVKASTE	K	D	A	E	K	G	2	0	0	2	0	1	3	1	1	1	4	1	0	0	1	1	3	0	1	2	0	0	24	0	2641.35	Q80YX1	Q80YX1	1034	1057	Tnc	Tenascin	yes	yes	3	2.4411E-05	50.271	2	1		2
DAVKEEDSLHWQR	GNKAKRSELLESLNKDAVKEEDSLHWQRPG	NKDAVKEEDSLHWQRPGDVQKVKALSFYQP	K	D	A	Q	R	P	1	1	0	2	0	1	2	0	1	0	1	1	0	0	0	1	0	1	0	1	0	0	13	1	1611.76	Q61838	Q61838	1185	1197	A2m	Alpha-2-macroglobulin;Alpha-2-macroglobulin 165 kDa subunit;Alpha-2-macroglobulin 35 kDa subunit	yes	yes	3;4	1.0335E-05	110.38	2	2	3	3	3
DAVKEEDSLHWQRPGDVQK	GNKAKRSELLESLNKDAVKEEDSLHWQRPG	EEDSLHWQRPGDVQKVKALSFYQPRAPSAE	K	D	A	Q	K	V	1	1	0	3	0	2	2	1	1	0	1	2	0	0	1	1	0	1	0	2	0	0	19	2	2236.09	Q61838	Q61838	1185	1203	A2m	Alpha-2-macroglobulin;Alpha-2-macroglobulin 165 kDa subunit;Alpha-2-macroglobulin 35 kDa subunit	yes	yes	3;4;5	3.2986E-70	153.11	5	4	4	2	3
DAVLLVFANK	AREELMRMLAEDELRDAVLLVFANKQDLPN	EDELRDAVLLVFANKQDLPNAMNAAEITDK	R	D	A	N	K	Q	2	0	1	1	0	0	0	0	0	0	2	1	0	1	0	0	0	0	0	2	0	0	10	0	1088.62	P84078;P61205;P84084	P84078	118	127	Arf1;Arf3;Arf5	ADP-ribosylation factor 1;ADP-ribosylation factor 3;ADP-ribosylation factor 5	yes	no	2	0.006444	83.265	1		1	1	1
DAVLNAWAEDVDLR	RQAHLYRGIFPVLCKDAVLNAWAEDVDLRV	KDAVLNAWAEDVDLRVNLAMDVGKARGFFK	K	D	A	L	R	V	3	1	1	3	0	0	1	0	0	0	2	0	0	0	0	0	0	1	0	2	0	0	14	0	1585.77	P52480	P52480	476	489	Pkm	Pyruvate kinase PKM	yes	yes	2	1.9025E-44	164.9	2	2	2	2	2
DAVSGMGVIVHVIEK	LFETISQAMLNAVDRDAVSGMGVIVHVIEK	DAVSGMGVIVHVIEKDKITTRTLKARMD__	R	D	A	E	K	D	1	0	0	1	0	0	1	2	1	2	0	1	1	0	0	1	0	0	0	4	0	0	15	0	1552.83	Q9R1P1	Q9R1P1	178	192	Psmb3	Proteasome subunit beta type-3	yes	yes	3	0.0041266	38.376				2	2
DAVTYTEHAK	ETRGVLKVFLENVIRDAVTYTEHAKRKTVT	ENVIRDAVTYTEHAKRKTVTAMDVVYALKR	R	D	A	A	K	R	2	0	0	1	0	0	1	0	1	0	0	1	0	0	0	0	2	0	1	1	0	0	10	0	1133.54	P62806	P62806	69	78	Hist1h4a	Histone H4	yes	yes	3	0.0064502	60.064				2	1
DAYISETSIAGSVLR	PLILHGEYIEFMCKRDAYISETSIAGSVLR	DAYISETSIAGSVLRVQCDRGRLKYPKCTP	R	D	A	L	R	V	2	1	0	1	0	0	1	1	0	2	1	0	0	0	0	3	1	0	1	1	0	0	15	0	1580.8	Q07968	Q07968	620	634	F13b	Coagulation factor XIII B chain	yes	yes	2;3	2.0912E-38	155.48	1	2	2	4	4
DAYSGGAVNLYHVR	AYDLARRAIYQATYRDAYSGGAVNLYHVRE	RDAYSGGAVNLYHVREDGWIRVSSDNVADL	R	D	A	V	R	E	2	1	1	1	0	0	0	2	1	0	1	0	0	0	0	1	0	0	2	2	0	0	14	0	1520.74	O55234;Q8BTY5	O55234	226	239	Psmb5	Proteasome subunit beta type-5	yes	no	3	0.0079021	40.552					1
DDGMLSK	YNLEESCTRFYHPEKDDGMLSKLCHSEMCR	TRFYHPEKDDGMLSKLCHSEMCRCAEENCF	K	D	D	S	K	L	0	0	0	2	0	0	0	1	0	0	1	1	1	0	0	1	0	0	0	0	0	0	7	0	764.337	P01027	P01027	1498	1504	C3	Complement C3;Complement C3 beta chain;C3-beta-c;Complement C3 alpha chain;C3a anaphylatoxin;Acylation stimulating protein;Complement C3b alpha chain;Complement C3c alpha chain fragment 1;Complement C3dg fragment;Complement C3g fragment;Complement C3d fragment;Complement C3f fragment;Complement C3c alpha chain fragment 2	yes	yes	2	0.010134	107.32	1	1	2		1
DDILNGSHPVSFDK	SRDPVQLNLLYVQARDDILNGSHPVSFDKA	RDDILNGSHPVSFDKACEFAGFQCQIQFGP	R	D	D	D	K	A	0	0	1	3	0	0	0	1	1	1	1	1	0	1	1	2	0	0	0	1	0	0	14	0	1542.73	P26039;A2AIM2	P26039	221	234	Tln1	Talin-1	yes	no	2;3	0.0033861	60.641			1		1
DDKESAPISDTVVPAVPPPTDLR	LNPGLEYNVSVYTVKDDKESAPISDTVVPA	SDTVVPAVPPPTDLRFTNIGPDTMRVTWAP	K	D	D	L	R	F	2	1	0	4	0	0	1	0	0	1	1	1	0	0	5	2	2	0	0	3	0	0	23	1	2418.23	A0A087WSN6;A0A087WR50;B9EHT6;Q3UHL6;B7ZNJ1;A0A087WS56	A0A087WSN6	1251	1273	Fn1		yes	no	2;3;4	2.9439E-51	159.4	2	2	5	4	3
DDLYVSDAFHK	SPEKSQLPGIVAGGRDDLYVSDAFHKAFLE	AGGRDDLYVSDAFHKAFLEVNEEGSEAAAS	R	D	D	H	K	A	1	0	0	3	0	0	0	0	1	0	1	1	0	1	0	1	0	0	1	1	0	0	11	0	1308.6	P32261	P32261	393	403	Serpinc1	Antithrombin-III	yes	yes	2;3	0.000553	117.89	1	2	2	3	2
DDNPSLPPFER	TKQEPERNECFLQHKDDNPSLPPFERPEAE	LQHKDDNPSLPPFERPEAEAMCTSFKENPT	K	D	D	E	R	P	0	1	1	2	0	0	1	0	0	0	1	0	0	1	3	1	0	0	0	0	0	0	11	0	1285.59	P07724	P07724	131	141	Alb	Serum albumin	yes	yes	2	9.7292E-05	123.75	2	1	2	1
DDNPSLPPFERPEAEAMCTSFK	TKQEPERNECFLQHKDDNPSLPPFERPEAE	PFERPEAEAMCTSFKENPTTFMGHYLHEVA	K	D	D	F	K	E	2	1	1	2	1	0	3	0	0	0	1	1	1	2	4	2	1	0	0	0	0	0	22	1	2480.1	P07724	P07724	131	152	Alb	Serum albumin	yes	yes	2;3	8.3351E-16	111.13	5	4	4	3	4
DDPEVQFSWFVDDVEVHTAQTKPR	TLTPKVTCVVVDISKDDPEVQFSWFVDDVE	FVDDVEVHTAQTKPREEQINSTFRSVSELP	K	D	D	P	R	E	1	1	0	4	0	2	2	0	1	0	0	1	0	2	2	1	2	1	0	4	0	0	24	1	2844.34	A0A075B5P4;A0A0A6YWR2	A0A075B5P4	146	169	Ighg1		yes	no	3;4	1.4569E-06	49.076				3
DDPEVQFSWFVDDVEVHTAQTQPR	TLTPKVTCVVVDISKDDPEVQFSWFVDDVE	FVDDVEVHTAQTQPREEQFNSTFRSVSELP	K	D	D	P	R	E	1	1	0	4	0	3	2	0	1	0	0	0	0	2	2	1	2	1	0	4	0	0	24	0	2844.3	P01868;P01869	P01868	146	169	Ighg1	Ig gamma-1 chain C region secreted form;Ig gamma-1 chain C region, membrane-bound form	yes	no	3;4	1.6016E-27	114.88	2	2	2	2	2
DDPVILENTAK	NGTSEEYVEYVKQYKDDPVILENTAKIKQC	KQYKDDPVILENTAKIKQCVDSTLTEEDKI	K	D	D	A	K	I	1	0	1	2	0	0	1	0	0	1	1	1	0	0	1	0	1	0	0	1	0	0	11	0	1213.62	E9PWZ2;D2XZ31;A0A087WQJ0	E9PWZ2	53	63	Scgb1b20;Abpa29_a7;Scgb1b11		yes	no	2	0.018758	54.608			1
DDSESMLYLQMNNLK	TYYADSVKDRFTISRDDSESMLYLQMNNLK	DDSESMLYLQMNNLKTEDTAMYYCVR____	R	D	D	L	K	T	0	0	2	2	0	1	1	0	0	0	3	1	2	0	0	2	0	0	1	0	0	0	15	0	1799.81	A0A0B4J1J6	A0A0B4J1J6	94	108	Ighv10-1		yes	yes	2;3	6.081E-81	170.99	1	1	2	3	3
DDSQSMLYLQMNNLK	TYYADSVKDRFTISRDDSQSMLYLQMNNLK	DDSQSMLYLQMNNLKTEDTAMYYCVR____	R	D	D	L	K	T	0	0	2	2	0	2	0	0	0	0	3	1	2	0	0	2	0	0	1	0	0	0	15	0	1798.82	A0A075B5T6	A0A075B5T6	94	108	Ighv10-3		yes	yes	2;3	0.0019237	72.006		3		2	1
DEELSCSVLELK	VPMMKMKLLTTRHFRDEELSCSVLELKYTG	HFRDEELSCSVLELKYTGNASALLILPDQG	R	D	E	L	K	Y	0	0	0	1	1	0	3	0	0	0	3	1	0	0	0	2	0	0	0	1	0	0	12	0	1363.65	A0A0R4J0I1;P07759;Q03734	P07759	255	266	Serpina3k;Serpina3m	Serine protease inhibitor A3K;Serine protease inhibitor A3M	no	no	2	0.03523	45.137			1
DEFEGLFK	KNFPNAIEHTLQWARDEFEGLFKQPAENVN	HTLQWARDEFEGLFKQPAENVNQYLTDSKF	R	D	E	F	K	Q	0	0	0	1	0	0	2	1	0	0	1	1	0	2	0	0	0	0	0	0	0	0	8	0	983.46	Q02053;P31254	Q02053	650	657	Uba1;Uba1y	Ubiquitin-like modifier-activating enzyme 1;Ubiquitin-like modifier-activating enzyme 1 Y	yes	no	2	0.031651	68.915					1
DEIPHNDIALLK	FRVEKILKYSQYNERDEIPHNDIALLKLKP	NERDEIPHNDIALLKLKPVGGHCALESRYV	R	D	E	L	K	L	1	0	1	2	0	0	1	0	1	2	2	1	0	0	1	0	0	0	0	0	0	0	12	0	1376.73	Q3V1J8;E9Q092;E9QM92;Q8K0D2;F7B276	Q3V1J8	362	373	Habp2	Hyaluronan-binding protein 2;Hyaluronan-binding protein 2 50 kDa heavy chain;Hyaluronan-binding protein 2 50 kDa heavy chain alternate form;Hyaluronan-binding protein 2 27 kDa light chain;Hyaluronan-binding protein 2 27 kDa light chain alternate form	yes	no	3	0.002067	48.948	1	2	1	2
DELADEIANSSGK	LAAAERAKRQAQQERDELADEIANSSGKGA	ERDELADEIANSSGKGALALEEKRRLEARI	R	D	E	G	K	G	2	0	1	2	0	0	2	1	0	1	1	1	0	0	0	2	0	0	0	0	0	0	13	0	1347.62	Q8VDD5	Q8VDD5	1704	1716	Myh9	Myosin-9	yes	yes	2	0.00017263	85.377		1	2	1	2
DEVNWYVMGMGNEIDLHTVHFHGHSFQYK	GKMFGNLQGLTMHVKDEVNWYVMGMGNEID	DLHTVHFHGHSFQYKHRGVYSSDVFDLFPG	K	D	E	Y	K	H	0	0	2	2	0	1	2	3	4	1	1	1	2	2	0	1	1	1	2	3	0	0	29	0	3489.57	G3X9T8;G3X8Q5	G3X9T8	972	1000	Cp		no	no	5	3.8307E-37	117.73	1	2
DFAFMQENQPTWK	VLQVNQSFVSSTAQKDFAFMQENQPTWKDI	QKDFAFMQENQPTWKDITDLKNSIMNIRQE	K	D	F	W	K	D	1	0	1	1	0	2	1	0	0	0	0	1	1	2	1	0	1	1	0	0	0	0	13	0	1640.73	A0A0N4SVL8;G3UVV6;B2RPV6	A0A0N4SVL8	426	438	Mmrn1	Multimerin-1	yes	no	2	8.6668E-21	137.89	1	1
DFALQNPGVVPR	DANPWDCSCPLKALRDFALQNPGVVPRFVQ	ALRDFALQNPGVVPRFVQTVCEGDDCQPVY	R	D	F	P	R	F	1	1	1	1	0	1	0	1	0	0	1	0	0	1	2	0	0	0	0	2	0	0	12	0	1311.69	A0A0R4J0S2;P70389	A0A0R4J0S2	548	559	Igfals	Insulin-like growth factor-binding protein complex acid labile subunit	yes	no	2	5.314E-35	168.8	2	2	2	1	2
DFANVYVDAVK	VWQQDEPQSQWDKVKDFANVYVDAVKDSGR	DKVKDFANVYVDAVKDSGRDYVSQFESSSL	K	D	F	V	K	D	2	0	1	2	0	0	0	0	0	0	0	1	0	1	0	0	0	0	1	3	0	0	11	0	1239.61	Q00623;A0A1L1STX7	Q00623	36	46	Apoa1	Apolipoprotein A-I;Proapolipoprotein A-I;Truncated apolipoprotein A-I	yes	no	1;2;3	6.4714E-15	170.72	4	6	4	4	5
DFANVYVDAVKDSGR	VWQQDEPQSQWDKVKDFANVYVDAVKDSGR	DFANVYVDAVKDSGRDYVSQFESSSLGQQL	K	D	F	G	R	D	2	1	1	3	0	0	0	1	0	0	0	1	0	1	0	1	0	0	1	3	0	0	15	1	1654.8	Q00623;A0A1L1STX7	Q00623	36	50	Apoa1	Apolipoprotein A-I;Proapolipoprotein A-I;Truncated apolipoprotein A-I	yes	no	2;3	0.0029477	111.12	3	3	6	2	3
DFASCHLAQAPNHVVVSR	DFELLCPDGTRKPVKDFASCHLAQAPNHVV	SCHLAQAPNHVVVSRKEKAARVKAVLTSQE	K	D	F	S	R	K	3	1	1	1	1	1	0	0	2	0	1	0	0	1	1	2	0	0	0	3	0	0	18	0	1949.95	Q921I1;F7CJN9;F7BAE9	Q921I1	593	610	Tf;Trf	Serotransferrin	yes	no	3	9.4642E-05	84.94	2	2	2	1
DFDSVPPVVR	VEATSYALLALLLLKDFDSVPPVVRWLNEQ	LLLLKDFDSVPPVVRWLNEQRYYGGGYGST	K	D	F	V	R	W	0	1	0	2	0	0	0	0	0	0	0	0	0	1	2	1	0	0	0	3	0	0	10	0	1129.58	P01027	P01027	1245	1254	C3	Complement C3;Complement C3 beta chain;C3-beta-c;Complement C3 alpha chain;C3a anaphylatoxin;Acylation stimulating protein;Complement C3b alpha chain;Complement C3c alpha chain fragment 1;Complement C3dg fragment;Complement C3g fragment;Complement C3d fragment;Complement C3f fragment;Complement C3c alpha chain fragment 2	yes	yes	2;3	2.9502E-06	151.27	3	2	3	3	2
DFETQAAAQAR	LKGLRLGHKCFLLSRDFETQAAAQARCKAR	LLSRDFETQAAAQARCKARGGSLAQPADRQ	R	D	F	A	R	C	4	1	0	1	0	2	1	0	0	0	0	0	0	1	0	0	1	0	0	0	0	0	11	0	1206.56	O88200	O88200	198	208	Clec11a	C-type lectin domain family 11 member A	yes	yes	2	0.00022764	114.89	2	2	2	2	2
DFFHLDER	HGFWRTKFDPSLTQKDFFHLDERFTVSVDM	DPSLTQKDFFHLDERFTVSVDMMHAVSYPL	K	D	F	E	R	F	0	1	0	2	0	0	1	0	1	0	1	0	0	2	0	0	0	0	0	0	0	0	8	0	1077.49	Q61247;Q5ND35	Q61247	253	260	Serpinf2	Alpha-2-antiplasmin	yes	no	3	0.028888	48.794	2	1	2	2
DFGTHFITEAVLGGIYEYTLIMNK	LPLEYSYGEYRDLLRDFGTHFITEAVLGGI	AVLGGIYEYTLIMNKDAMEQGDYTLSHVTA	R	D	F	N	K	D	1	0	1	1	0	0	2	3	1	3	2	1	1	2	0	0	3	0	2	1	0	0	24	0	2731.36	Q8BH35	Q8BH35	338	361	C8b	Complement component C8 beta chain	yes	yes	3	3.1753E-12	68.88	2	2
DFHINLFQVLPWLK	CRDQRRQQLVPSYARDFHINLFQVLPWLKD	RDFHINLFQVLPWLKDKLKDEDLGFL____	R	D	F	L	K	D	0	0	1	1	0	1	0	0	1	1	3	1	0	2	1	0	0	1	0	1	0	0	14	0	1768.97	B8JJN0;F6VQX8;B8JJM5;P04186;H3BK95	B8JJN0	1252	1265	Gm20547;Cfb	Complement factor B;Complement factor B Ba fragment;Complement factor B Bb fragment	yes	no	2;3	0.00017364	78.486	2	4		1
DFHISLFR	NKNLRKKPPRGVLPRDFHISLFRLQPWLRQ	PRGVLPRDFHISLFRLQPWLRQHLDGVLDF	R	D	F	F	R	L	0	1	0	1	0	0	0	0	1	1	1	0	0	2	0	1	0	0	0	0	0	0	8	0	1033.53	P21180;B8JJN2;B8JJM9	P21180	735	742	C2	Complement C2;Complement C2b fragment;Complement C2a fragment	yes	no	3	0.0096177	66.073	2	2	2	2
DFLMEFSSR	MCKSTRHRAACFQLKDFLMEFSSRGCQV__	ACFQLKDFLMEFSSRGCQV___________	K	D	F	S	R	G	0	1	0	1	0	0	1	0	0	0	1	0	1	2	0	2	0	0	0	0	0	0	9	0	1130.51	P01029	P01029	1726	1734	C4b	Complement C4-B;Complement C4 beta chain;Complement C4 alpha chain;C4a anaphylatoxin;Complement C4 gamma chain	yes	yes	2	2.1481E-11	160.75	3	2	2	3	5
DFLYLGANVQYMR	PRHIQLHDLDFQIRKDFLYLGANVQYMRV_	RKDFLYLGANVQYMRV______________	K	D	F	M	R	V	1	1	1	1	0	1	0	1	0	0	2	0	1	1	0	0	0	0	2	1	0	0	13	0	1588.77	Q61805	Q61805	468	480	Lbp	Lipopolysaccharide-binding protein	yes	yes	2	0.01666	49.368				1
DFQLFSSPLGK	ILKVAQEHFGKGKSKDFQLFSSPLGKDLLF	GKSKDFQLFSSPLGKDLLFKDSAFGLLRVP	K	D	F	G	K	D	0	0	0	1	0	1	0	1	0	0	2	1	0	2	1	2	0	0	0	0	0	0	11	0	1237.63	Q921I1;E9Q2Q7	Q921I1	300	310	Tf;Trf	Serotransferrin	yes	no	2	2.1252E-16	156.92	4	3	3	3	3
DFSALESQLQDTQELLQEENR	GLLSQSDSKSSKLTKDFSALESQLQDTQEL	SQLQDTQELLQEENRQKLSLSTKLKQMEDE	K	D	F	N	R	Q	1	1	1	2	0	4	4	0	0	0	4	0	0	1	0	2	1	0	0	0	0	0	21	0	2492.17	Q8VDD5;A0A2R8W6V7	Q8VDD5	1302	1322	Myh9	Myosin-9	yes	no	2;3	0	231.21		2	2	2	2
DFSIWEETGLK	EINLPYTEFKTPLLKDFSIWEETGLKEFLK	PLLKDFSIWEETGLKEFLKTTKQSFDLSVK	K	D	F	L	K	E	0	0	0	1	0	0	2	1	0	1	1	1	0	1	0	1	1	1	0	0	0	0	11	0	1323.63	E9Q414;E9Q1Y3	E9Q414	3143	3153	Apob	Apolipoprotein B-100;Apolipoprotein B-48	yes	no	1;2	1.9924E-09	133.57	2	1	2	3	2
DFSIWEETGLKEFLK	EINLPYTEFKTPLLKDFSIWEETGLKEFLK	DFSIWEETGLKEFLKTTKQSFDLSVKAQYK	K	D	F	L	K	T	0	0	0	1	0	0	3	1	0	1	2	2	0	2	0	1	1	1	0	0	0	0	15	1	1840.92	E9Q414;E9Q1Y3	E9Q414	3143	3157	Apob	Apolipoprotein B-100;Apolipoprotein B-48	yes	no	3	0.0029747	55.656	2		1
DFTPAAQAAFQK	LGNMIVIVLGHHLGKDFTPAAQAAFQKVVA	LGKDFTPAAQAAFQKVVAGVAAALAHKYH_	K	D	F	Q	K	V	4	0	0	1	0	2	0	0	0	0	0	1	0	2	1	0	1	0	0	0	0	0	12	0	1293.64	A8DUK4;P02088;P02089	A8DUK4	122	133	Hbbt1;Hbb-b1;Hbb-b2	Hemoglobin subunit beta-1;Hemoglobin subunit beta-2	no	no	2;3	5.6981E-38	157.91	4	3	2	4	4
DFTTTGTAYFEIK	NPKYGVWTIKANYKKDFTTTGTAYFEIKEY	KKDFTTTGTAYFEIKEYVLPRFSVSIELER	K	D	F	I	K	E	1	0	0	1	0	0	1	1	0	1	0	1	0	2	0	0	4	0	1	0	0	0	13	0	1492.71	P06684	P06684	208	220	C5	Complement C5;Complement C5 beta chain;Complement C5 alpha chain;C5a anaphylatoxin;Complement C5 alpha chain	yes	yes	2;3	1.5612E-89	166.97	2	2	3	2	1
DFWDNLEK	STVSQLQERLGPLTRDFWDNLEKETDWVRQ	RLGPLTRDFWDNLEKETDWVRQEMNKDLEE	R	D	F	E	K	E	0	0	1	2	0	0	1	0	0	0	1	1	0	1	0	0	0	1	0	0	0	0	8	0	1065.48	Q00623;A0A1L1STX7	Q00623	93	100	Apoa1	Apolipoprotein A-I;Proapolipoprotein A-I;Truncated apolipoprotein A-I	yes	no	2	0.0084592	105.04	2	2	2	3	3
DFWDNLEKETDWVR	STVSQLQERLGPLTRDFWDNLEKETDWVRQ	RDFWDNLEKETDWVRQEMNKDLEEVKQKVQ	R	D	F	V	R	Q	0	1	1	3	0	0	2	0	0	0	1	1	0	1	0	0	1	2	0	1	0	0	14	1	1851.84	Q00623;A0A1L1STX7	Q00623	93	106	Apoa1	Apolipoprotein A-I;Proapolipoprotein A-I;Truncated apolipoprotein A-I	yes	no	2;3	1.0266E-16	123.95	3	3	4	4	4
DGAWSNK	KDNEVMDTFQIECLKDGAWSNKIPTCKIVD	TFQIECLKDGAWSNKIPTCKIVDCGAPAGL	K	D	G	N	K	I	1	0	1	1	0	0	0	1	0	0	0	1	0	0	0	1	0	1	0	0	0	0	7	0	776.345	P98064;A0A2R8VHR3	P98064	357	363	Masp1	Mannan-binding lectin serine protease 1;Mannan-binding lectin serine protease 1 heavy chain;Mannan-binding lectin serine protease 1 light chain	yes	no	2	0.016248	97.068			1
DGDEQVR	GNITVVMGEHDFSEKDGDEQVRRVTQVIMP	GEHDFSEKDGDEQVRRVTQVIMPDKYIRGK	K	D	G	V	R	R	0	1	0	2	0	1	1	1	0	0	0	0	0	0	0	0	0	0	0	1	0	0	7	0	817.357	P70375	P70375	258	264	F7	Coagulation factor VII;Factor VII light chain;Factor VII heavy chain	yes	yes	2	0.0097285	116.11	2	2	1	1	1
DGDKYFHAR	______________________________	KEAGWKDGDKYFHARGNYDAAQRGPGGVWA	K	D	G	A	R	G	1	1	0	2	0	0	0	1	1	0	0	1	0	1	0	0	0	0	1	0	0	0	9	1	1107.51	A0A1B0GQV5;P05367	A0A1B0GQV5	15	23	Saa2	Serum amyloid A-2 protein;Amyloid protein A	yes	no	3	0.00061897	90.761				1
DGEEAGAYDGPR	NKYGVSGYPTLKIFRDGEEAGAYDGPRTAD	IFRDGEEAGAYDGPRTADGIVSHLKKQAGP	R	D	G	P	R	T	2	1	0	2	0	0	2	3	0	0	0	0	0	0	1	0	0	0	1	0	0	0	12	0	1235.51	P27773;F6Q404	P27773	108	119	Pdia3	Protein disulfide-isomerase A3	yes	no	2	0.011519	56.548		1			1
DGETFQLMGLYGR	TDYDNFLMAHLINEKDGETFQLMGLYGREP	EKDGETFQLMGLYGREPDLSSDIKERFAQL	K	D	G	G	R	E	0	1	0	1	0	1	1	3	0	0	2	0	1	1	0	0	1	0	1	0	0	0	13	0	1485.69	A2BIN1;Q4FZE8;P11589;B8JI96;A2CEK7;A2AKN8;E9PVW0;A2BIN0	A2BIN1	128	140	Mup10;Mup1;Mup2;Mup14;Mup8;Mup11	Major urinary protein 2	no	no	2	2.4384E-28	147.75	2	1	2
DGETFQLMGLYGREPDLSSDIK	TDYDNFLMAHLINEKDGETFQLMGLYGREP	MGLYGREPDLSSDIKERFAQLCEEHGILRE	K	D	G	I	K	E	0	1	0	3	0	1	2	3	0	1	3	1	1	1	1	2	1	0	1	0	0	0	22	1	2470.17	A2BIN1;Q4FZE8;P11589;B8JI96;A2CEK7;A2AKN8;E9PVW0;A2BIN0	A2BIN1	128	149	Mup10;Mup1;Mup2;Mup14;Mup8;Mup11	Major urinary protein 2	no	no	3	0.001079	42.172			2
DGFSGPAPR	VAEMNPNVNVFVPPRDGFSGPAPRKSKLIC	VFVPPRDGFSGPAPRKSKLICEATNFTPKP	R	D	G	P	R	K	1	1	0	1	0	0	0	2	0	0	0	0	0	1	2	1	0	0	0	0	0	0	9	0	902.425	A0A075B6A0;A0A075B5P6;P01872	A0A075B6A0	122	130	Ighm	Ig mu chain C region	yes	no	2	0.00017748	141.52	3	4	2	2	3
DGGGDVAFVK	TQPFFGYVGAFKCLKDGGGDVAFVKHTTIF	FKCLKDGGGDVAFVKHTTIFEVLPEKADRD	K	D	G	V	K	H	1	0	0	2	0	0	0	3	0	0	0	1	0	1	0	0	0	0	0	2	0	0	10	0	963.466	Q921I1;D3YYR8	Q921I1	216	225	Tf;Trf	Serotransferrin	yes	no	1;2	3.1777E-06	135.83	2	6	5	4	4
DGGQTAPASIR	FGGKPMIIYKGGTSRDGGQTAPASIRLFQV	GTSRDGGQTAPASIRLFQVRASSSGATRAV	R	D	G	I	R	L	2	1	0	1	0	1	0	2	0	1	0	0	0	0	1	1	1	0	0	0	0	0	11	0	1071.53	P13020;A0A0J9YUQ8	P13020	552	562	Gsn	Gelsolin	yes	no	2	7.6781E-21	162.34	4	4	4	2	4
DGGSRGDSPGDSR	TEMRQMRMELERPGKDGGSRGDSPGDSRGD	GKDGGSRGDSPGDSRGDSRGDFATRGPGSK	K	D	G	S	R	G	0	2	0	3	0	0	0	4	0	0	0	0	0	0	1	3	0	0	0	0	0	0	13	1	1261.53	E9PV24	E9PV24	268	280	Fga	Fibrinogen alpha chain;Fibrinopeptide A;Fibrinogen alpha chain	yes	yes	3	0.018282	41.378				1
DGHFTLFAPTNEAFEK	RAAAITSDLLESLGRDGHFTLFAPTNEAFE	GHFTLFAPTNEAFEKLPRGVLERIMGDKVA	R	D	G	E	K	L	2	0	1	1	0	0	2	1	1	0	1	1	0	3	1	0	2	0	0	0	0	0	16	0	1822.85	Q62009;CON__Q2KJC7	Q62009	268	283	Postn	Periostin	yes	no	3	0.00051495	78.191	2	2	2	2	2
DGHVILQLNSIPSR	LVEGVDQLLTDYQIKDGHVILQLNSIPSRD	KDGHVILQLNSIPSRDFLCVRFRIFELFQV	K	D	G	S	R	D	0	1	1	1	0	1	0	1	1	2	2	0	0	0	1	2	0	0	0	1	0	0	14	0	1547.84	P06684	P06684	1461	1474	C5	Complement C5;Complement C5 beta chain;Complement C5 alpha chain;C5a anaphylatoxin;Complement C5 alpha chain	yes	yes	3	0.00023644	83.087	2	2	2	2	2
DGKIEVQFK	AESLDHSNWLLIALRDGKIEVQFKNEFSTQ	LLIALRDGKIEVQFKNEFSTQITTGGNVIN	R	D	G	F	K	N	0	0	0	1	0	1	1	1	0	1	0	2	0	1	0	0	0	0	0	1	0	0	9	1	1062.57	Q08761	Q08761	356	364	Pros1	Vitamin K-dependent protein S	yes	yes	3	0.0083822	72.325	2		2
DGKLVESGFTTDPVTIENK	ATNFTPKPITVSWLKDGKLVESGFTTDPVT	VESGFTTDPVTIENKGSTPQTYKVISTLTI	K	D	G	N	K	G	0	0	1	2	0	0	2	2	0	1	1	2	0	1	1	1	3	0	0	2	0	0	19	1	2049.03	A0A075B6A0;A0A075B5P6;P01872	A0A075B6A0	153	171	Ighm	Ig mu chain C region	yes	no	3	0.026296	28.748			1
DGLSTSATTNLK	KINTGAHKATLKIARDGLSTSATTNLKYSP	IARDGLSTSATTNLKYSPLLLENELNAELG	R	D	G	L	K	Y	1	0	1	1	0	0	0	1	0	0	2	1	0	0	0	2	3	0	0	0	0	0	12	0	1206.61	E9Q414;E9Q1Y3	E9Q414	1650	1661	Apob	Apolipoprotein B-100;Apolipoprotein B-48	yes	no	2	6.3443E-05	152.11	2	1	2	2	1
DGQVIGIGAGQQSR	VAVKYTQSNSVCYAKDGQVIGIGAGQQSRI	KDGQVIGIGAGQQSRIHCTRLAGDKANSWW	K	D	G	S	R	I	1	1	0	1	0	3	0	4	0	2	0	0	0	0	0	1	0	0	0	1	0	0	14	0	1384.71	Q9CWJ9	Q9CWJ9	438	451	Atic	Bifunctional purine biosynthesis protein PURH;Phosphoribosylaminoimidazolecarboxamide formyltransferase;IMP cyclohydrolase	yes	yes	2	0.003188	61.11				1	2
DGSSGGVIR	CLQFTANALALAMERDGSSGGVIRLAAIQE	ALAMERDGSSGGVIRLAAIQESGVERQVLL	R	D	G	I	R	L	0	1	0	1	0	0	0	3	0	1	0	0	0	0	0	2	0	0	0	1	0	0	9	0	846.42	Q60692	Q60692	200	208	Psmb6	Proteasome subunit beta type-6	yes	yes	2	0.032672	63.565					1
DGSYSAFGDQNGER	FLRAGYQRELNYKHKDGSYSAFGDQNGERE	KDGSYSAFGDQNGEREGNTWLTAFVLKSFA	K	D	G	E	R	E	1	1	1	2	0	1	1	3	0	0	0	0	0	1	0	2	0	0	1	0	0	0	14	0	1501.61	P28665;P28666	P28665	1024	1037	Mug1;Mug2	Murinoglobulin-1;Murinoglobulin-2	no	no	2;3	2.1258999999999999E-44	164.33	2	2	2	2	2
DGSYSAFGDQNGEREGNTWLTAFVLK	FLRAGYQRELNYKHKDGSYSAFGDQNGERE	GEREGNTWLTAFVLKSFAQARAFIFIDESH	K	D	G	L	K	S	2	1	2	2	0	1	2	4	0	0	2	1	0	2	0	2	2	1	1	1	0	0	26	1	2861.33	P28665;P28666	P28665	1024	1049	Mug1;Mug2	Murinoglobulin-1;Murinoglobulin-2	no	no	3	0.0026376	28.638			1
DGVVVTINK	SGSMFSWRDQAVLQKDGVVVTINKKRNLVV	QAVLQKDGVVVTINKKRNLVVSVDDGATFE	K	D	G	N	K	K	0	0	1	1	0	0	0	1	0	1	0	1	0	0	0	0	1	0	0	3	0	0	9	0	943.534	Q61702;F8WJ05	Q61702	769	777	Itih1	Inter-alpha-trypsin inhibitor heavy chain H1	yes	no	2	0.034954	62.546		1	1
DGWHSWPIAHHWPQGPSTVDAAFSWDDK	YAFTGSHYWRLDSSRDGWHSWPIAHHWPQG	QGPSTVDAAFSWDDKVYLIQGTQVYVFLTK	R	D	G	D	K	V	3	0	0	4	0	1	0	2	3	1	0	1	0	1	3	3	1	4	0	1	0	0	28	0	3229.44	Q91X72	Q91X72	288	315	Hpx	Hemopexin	yes	yes	4;5	0.00035657	30.855	2	2
DGYTGENSPLYK	LDYIQVMTYDLHDPKDGYTGENSPLYKSPY	DPKDGYTGENSPLYKSPYDIGKSADLNVDS	K	D	G	Y	K	S	0	0	1	1	0	0	1	2	0	0	1	1	0	0	1	1	1	0	2	0	0	0	12	0	1342.6	O35744	O35744	219	230	Chil3	Chitinase-like protein 3	yes	yes	2	0.018737	51.268
DHAVDLIQK	LDRTEQWSKLSPETKDHAVDLIQKGYMRIQ	LSPETKDHAVDLIQKGYMRIQQFRKNDGSF	K	D	H	Q	K	G	1	0	0	2	0	1	0	0	1	1	1	1	0	0	0	0	0	0	0	1	0	0	9	0	1037.55	P01029	P01029	1039	1047	C4b	Complement C4-B;Complement C4 beta chain;Complement C4 alpha chain;C4a anaphylatoxin;Complement C4 gamma chain	yes	yes	2;3	5.1831999999999995E-89	202.45	2	2	3		3
DHEELSLVASEAVR	QQILFPYSYNRSKSKDHEELSLVASEAVRA	KDHEELSLVASEAVRAIESINKNTRYTHGS	K	D	H	V	R	A	2	1	0	1	0	0	3	0	1	0	2	0	0	0	0	2	0	0	0	2	0	0	14	0	1553.77	Q9JHH6	Q9JHH6	328	341	Cpb2	Carboxypeptidase B2	yes	yes	3	0.0050348	44.968
DHETELLSQQK	GANMALRRSPGSTCKDHETELLSQQKVPAH	STCKDHETELLSQQKVPAHFVALNGNRLNI	K	D	H	Q	K	V	0	0	0	1	0	2	2	0	1	0	2	1	0	0	0	1	1	0	0	0	0	0	11	0	1326.64	B8JJN0;F6VQX8;P21180;B8JJN2;B8JJM9	B8JJN0	458	468	Gm20547;C2	Complement C2;Complement C2b fragment;Complement C2a fragment	no	no	3	0.0012048	65.5	2	1	2	2
DHFGLEGDEESTMLEDSVSPK	IAGYIDIILKKKKSKDHFGLEGDEESTMLE	GDEESTMLEDSVSPKKSTVLQQQYNRVGKV	K	D	H	P	K	K	0	0	0	3	0	0	4	2	1	0	2	1	1	1	1	3	1	0	0	1	0	0	21	0	2321	P26039	P26039	407	427	Tln1	Talin-1	yes	yes	3	5.322E-08	65.25	1	2	2	1	2
DHFIDGFISLGAPWGGSIK	LHVLHFLLRQPQSWKDHFIDGFISLGAPWG	DGFISLGAPWGGSIKAMRILASGDNQGIPI	K	D	H	I	K	A	1	0	0	2	0	0	0	4	1	3	1	1	0	2	1	2	0	1	0	0	0	0	19	0	2016.01	P16301	P16301	224	242	Lcat	Phosphatidylcholine-sterol acyltransferase	yes	yes	3	7.6733E-05	52.866	2	2	2
DHFQDTLEDVR	TVVIDWLQDILTQMKDHFQDTLEDVRDRIY	TQMKDHFQDTLEDVRDRIYQMDIQRELEHF	K	D	H	V	R	D	0	1	0	3	0	1	1	0	1	0	1	0	0	1	0	0	1	0	0	1	0	0	11	0	1373.62	E9Q414;E9Q1Y3	E9Q414	2504	2514	Apob	Apolipoprotein B-100;Apolipoprotein B-48	yes	no	3	0.0018319	60.49	1	1
DHFSLQAQYR	LYNWSASYTGGNTSRDHFSLQAQYRMKTDS	GNTSRDHFSLQAQYRMKTDSVVDLFSYSVQ	R	D	H	Y	R	M	1	1	0	1	0	2	0	0	1	0	1	0	0	1	0	1	0	0	1	0	0	0	10	0	1263.6	E9Q414;E9Q1Y3	E9Q414	1381	1390	Apob	Apolipoprotein B-100;Apolipoprotein B-48	yes	no	2;3	8.0288E-16	152.34	2	3	3	3	3
DHHHTHK	RPLCDKHLCKLSGSRDHHHTHKTDKLGCPP	LCKLSGSRDHHHTHKTDKLGCPPPPEGKDN	R	D	H	H	K	T	0	0	0	1	0	0	0	0	4	0	0	1	0	0	0	0	1	0	0	0	0	0	7	0	910.416	Q9ESB3;A0A0R4J039	Q9ESB3	276	282	Hrg	Histidine-rich glycoprotein	yes	no	2;3	0.0023343	116.54	2	3	2	2
DHLVQATPANLK	YLNFILFSTDVTTWKDHLVQATPANLKEAK	TWKDHLVQATPANLKEAKTFVKNIHDQSMT	K	D	H	L	K	E	2	0	1	1	0	1	0	0	1	0	2	1	0	0	1	0	1	0	0	1	0	0	12	0	1305.7	Q61704;A0A2I3BRQ3	Q61704	334	345	Itih3	Inter-alpha-trypsin inhibitor heavy chain H3	yes	no	2;3	1.3613E-18	166.97	2	3	3	2	3
DHVLGLAR	DCCNHITKLREQHRRDHVLGLARSELEEDI	LREQHRRDHVLGLARSELEEDIIPEEDIIS	R	D	H	A	R	S	1	1	0	1	0	0	0	1	1	0	2	0	0	0	0	0	0	0	0	1	0	0	8	0	879.493	P01027	P01027	741	748	C3	Complement C3;Complement C3 beta chain;C3-beta-c;Complement C3 alpha chain;C3a anaphylatoxin;Acylation stimulating protein;Complement C3b alpha chain;Complement C3c alpha chain fragment 1;Complement C3dg fragment;Complement C3g fragment;Complement C3d fragment;Complement C3f fragment;Complement C3c alpha chain fragment 2	yes	yes	2	9.9599E-90	185.22		1		1	2
DHWELDLDIK	KKLTVRLGEYDLRRRDHWELDLDIKEILVH	DLRRRDHWELDLDIKEILVHPNYTRSSSDN	R	D	H	I	K	E	0	0	0	3	0	0	1	0	1	1	2	1	0	0	0	0	0	1	0	0	0	0	10	0	1282.62	P33587	P33587	274	283	Proc	Vitamin K-dependent protein C;Vitamin K-dependent protein C light chain;Vitamin K-dependent protein C heavy chain;Activation peptide	yes	yes	2;3	7.6176E-22	169.09	3	3	2	3	3
DIAYLGITDVR	PRNAEENSAIQKVAKDIAYLGITDVRVEGS	KVAKDIAYLGITDVRVEGSFEDLTGNRVRY	K	D	I	V	R	V	1	1	0	2	0	0	0	1	0	2	1	0	0	0	0	0	1	0	1	1	0	0	11	0	1234.66	P41317	P41317	176	186	Mbl2	Mannose-binding protein C	yes	yes	2;3	1.1903E-12	144.77	6	4	4	2	2
DIAYLGITDVRVEGSFEDLTGNR	PRNAEENSAIQKVAKDIAYLGITDVRVEGS	DVRVEGSFEDLTGNRVRYTNWNDGEPNNTG	K	D	I	N	R	V	1	2	1	3	0	0	2	3	0	2	2	0	0	1	0	1	2	0	1	2	0	0	23	1	2539.26	P41317	P41317	176	198	Mbl2	Mannose-binding protein C	yes	yes	3	0.0011833	35.703	2		1
DICEGQVNSLPGSINK	VSLTAFVLIALQEARDICEGQVNSLPGSIN	ICEGQVNSLPGSINKAGEYIEASYMNLQRP	R	D	I	N	K	A	0	0	2	1	1	1	1	2	0	2	1	1	0	0	1	2	0	0	0	1	0	0	16	0	1672.81	P01027	P01027	1156	1171	C3	Complement C3;Complement C3 beta chain;C3-beta-c;Complement C3 alpha chain;C3a anaphylatoxin;Acylation stimulating protein;Complement C3b alpha chain;Complement C3c alpha chain fragment 1;Complement C3dg fragment;Complement C3g fragment;Complement C3d fragment;Complement C3f fragment;Complement C3c alpha chain fragment 2	yes	yes	2	0.004251	107.97			1
DIEHLTGLDFYR	KWVEELMKMHTARVRDIEHLTGLDFYRKTS	RVRDIEHLTGLDFYRKTSRSYSEILTLKTY	R	D	I	Y	R	K	0	1	0	2	0	0	1	1	1	1	2	0	0	1	0	0	1	0	1	0	0	0	12	0	1477.72	Q9R1E6;G3UXY9	Q9R1E6	828	839	Enpp2	Ectonucleotide pyrophosphatase/phosphodiesterase family member 2	yes	no	3	0.00052141	78.692	2	2	2		1
DIFTGLIGPMK	VCLSKMYYSGVDPTKDIFTGLIGPMKICKK	DPTKDIFTGLIGPMKICKKGSLLADGRQKD	K	D	I	M	K	I	0	0	0	1	0	0	0	2	0	2	1	1	1	1	1	0	1	0	0	0	0	0	11	0	1190.64	G3X9T8;G3X8Q5	G3X9T8	542	552	Cp		no	no	2	1.6583E-13	149.94	2	2	2	2	2
DIHVVHFHGQTLLDNR	QEWVRLHLLNMGGSRDIHVVHFHGQTLLDN	IHVVHFHGQTLLDNRTKQHQLGVWPLLPGS	R	D	I	N	R	T	0	1	1	2	0	1	0	1	3	1	2	0	0	1	0	0	1	0	0	2	0	0	16	0	1899.97	O88783	O88783	1797	1812	F5	Coagulation factor V;Coagulation factor V heavy chain;Coagulation factor V light chain	yes	yes	3;4	0.0013334	53.828		1	1	1
DILATNGVIHFIDELLIPDSAK	GDKLTINGKAVISNKDILATNGVIHFIDEL	VIHFIDELLIPDSAKTLLELAGESDVSTAI	K	D	I	A	K	T	2	0	1	3	0	0	1	1	1	4	3	1	0	1	1	1	1	0	0	1	0	0	22	0	2393.28	P82198;Q3UXJ2	P82198	356	377	Tgfbi	Transforming growth factor-beta-induced protein ig-h3	yes	no	3	6.8216E-05	49.528		2
DILSSNNQHGILPLSWNIPELVNMGQWK	VVILIETPDGIPVKRDILSSNNQHGILPLS	LSWNIPELVNMGQWKIRAFYEHAPKQIFSA	R	D	I	W	K	I	0	0	4	1	0	2	1	2	1	3	4	1	1	0	2	3	0	2	0	1	0	0	28	0	3202.62	P01027	P01027	179	206	C3	Complement C3;Complement C3 beta chain;C3-beta-c;Complement C3 alpha chain;C3a anaphylatoxin;Acylation stimulating protein;Complement C3b alpha chain;Complement C3c alpha chain fragment 1;Complement C3dg fragment;Complement C3g fragment;Complement C3d fragment;Complement C3f fragment;Complement C3c alpha chain fragment 2	yes	yes	3;4	2.5187E-85	144.26	5	5	4	3	2
DILTLDLSR	DECFAHLAPYPNYDRDILTLDLSRVTPNLM	YPNYDRDILTLDLSRVTPNLMGQLCGSGRV	R	D	I	S	R	V	0	1	0	2	0	0	0	0	0	1	3	0	0	0	0	1	1	0	0	0	0	0	9	0	1044.58	Q61508;F8WI14	Q61508	427	435	Ecm1	Extracellular matrix protein 1	yes	no	2	0.01274	81.548	2	2	2	2	1
DILTSNGIDIEK	GRNPYLPPETITYLKDILTSNGIDIEKMTT	YLKDILTSNGIDIEKMTTTDQANCPDFL__	K	D	I	E	K	M	0	0	1	2	0	0	1	1	0	3	1	1	0	0	0	1	1	0	0	0	0	0	12	0	1316.68	P51910	P51910	165	176	Apod	Apolipoprotein D	yes	yes	2	8.3317E-20	174.41		2		2	2
DIPVDSPELK	DLVEALPKPCPGCPRDIPVDSPELKEVLGH	PGCPRDIPVDSPELKEVLGHSIAQLNAEND	R	D	I	L	K	E	0	0	0	2	0	0	1	0	0	1	1	1	0	0	2	1	0	0	0	1	0	0	10	0	1111.58	A0A0R4J038;D3YTY9;O08677;Q6S9I0;A0A338P699;Q6S9I2	A0A0R4J038	269	278	Kng1;Kng2	Kininogen-1;Kininogen-1 heavy chain;Bradykinin;Kininogen-1 light chain	no	no	1;2	0.0008373	104.44	2	2	2	3	2
DIQARIFLIASK	WSSTEYSTWAESRWKDIQARIFLIASKELE	RWKDIQARIFLIASKELEFITLIVGFSTLV	K	D	I	S	K	E	2	1	0	1	0	1	0	0	0	3	1	1	0	1	0	1	0	0	0	0	0	0	12	1	1373.8	P57716	P57716	654	665	Ncstn	Nicastrin	yes	yes	2	0.0236	65.305					1
DIQMTQSPSSLSASLGER	______________________________	MTQSPSSLSASLGERVSLTCRASQEISGYL	-	D	I	E	R	V	1	1	0	1	0	2	1	1	0	1	2	0	1	0	1	5	1	0	0	0	0	0	18	0	1905.91	A0A075B5K2	A0A075B5K2	1	18	Igkv9-124		yes	yes	2;3	0	232.5	2	2	4	11	6
DIQMTQSTSSLSASLGDR	______________________________	MTQSTSSLSASLGDRVTISCRASQDISNYL	-	D	I	D	R	V	1	1	0	2	0	2	0	1	0	1	2	0	1	0	0	5	2	0	0	0	0	0	18	0	1895.89	P01646	P01646	1	18		Ig kappa chain V-V region HP 123E6	yes	yes	2	0.001679	72.496				1	1
DIQMTQTPSSLSASLGDR	______________________________	MTQTPSSLSASLGDRVTISCRASQDINNYL	-	D	I	D	R	V	1	1	0	2	0	2	0	1	0	1	2	0	1	0	1	4	2	0	0	0	0	0	18	0	1905.91	P01648;P01649	P01648	1	18		Ig kappa chain V-V region HP 91A3;Ig kappa chain V-V regions	yes	no	2;3	0.00046449	80.522					1
DIQMTQTTSSLSASLGDR	______________________________	MTQTTSSLSASLGDRVTISCRASQDISNYL	-	D	I	D	R	V	1	1	0	2	0	2	0	1	0	1	2	0	1	0	0	4	3	0	0	0	0	0	18	0	1909.91	P01645;P01644;P01643;A0A075B5L0;P01647	P01645	1	18	Igkv10-95	Ig kappa chain V-V region HP 93G7;Ig kappa chain V-V region HP R16.7;Ig kappa chain V-V region MOPC 173;Ig kappa chain V-V region HP 124E1	no	no	2;3	5.354100000000001E-301	233.24	5	3	4	8	7
DISANKVDAVTVDGALVAEADLPHHSLKPIMAEYYGSK	AVTCVRKMSHPECIRDISANKVDAVTVDGA	HHSLKPIMAEYYGSKDDPKTHYYVVAMAKK	R	D	I	S	K	D	6	0	1	4	0	0	2	2	2	2	3	3	1	0	2	3	1	0	2	4	0	0	38	2	4024.03	Q9DBD0;D3YY36	Q9DBD0	70	107	Ica;1300017J02Rik	Inhibitor of carbonic anhydrase	yes	no	5;6	4.3251E-11	39.144	2	1
DISTNYYASQK	NMERIMKAQAYQTGKDISTNYYASQKKTFE	QTGKDISTNYYASQKKTFEINPRHPLIRDM	K	D	I	Q	K	K	1	0	1	1	0	1	0	0	0	1	0	1	0	0	0	2	1	0	2	0	0	0	11	0	1288.59	P08113;F7C312	P08113	672	682	Hsp90b1	Endoplasmin	yes	no	2	0.017425	55.567	1		1		1
DITDTSIGAYWTSAPGMVR	STLEERGSPQNLVTKDITDTSIGAYWTSAP	TSIGAYWTSAPGMVRGYRVSWKSLYDDIEA	K	D	I	V	R	G	2	1	0	2	0	0	0	2	0	2	0	0	1	0	1	2	3	1	1	1	0	0	19	0	2039.96	E9PX70;Q60847	E9PX70	915	933	Col12a1	Collagen alpha-1(XII) chain	yes	no	2	0.0063551	64.65				1	2
DITPTLTLYVGK	AKNLFLNHSETASAKDITPTLTLYVGKNQL	SAKDITPTLTLYVGKNQLVEIEKVVLHPNH	K	D	I	G	K	N	0	0	0	1	0	0	0	1	0	1	2	1	0	0	1	0	3	0	1	1	0	0	12	0	1319.73	Q61646	Q61646	157	168	Hp	Haptoglobin;Haptoglobin alpha chain;Haptoglobin beta chain	yes	yes	2	9.7825E-05	110.14		1		2
DITTVNFPPALASGGR	FPSGTMNVTWGKSGKDITTVNFPPALASGG	ITTVNFPPALASGGRYTMSNQLTLPAVECP	K	D	I	G	R	Y	2	1	1	1	0	0	0	2	0	1	1	0	0	1	2	1	2	0	0	1	0	0	16	0	1614.84	P01878	P01878	47	62		Ig alpha chain C region	yes	yes	2;3	3.6251E-43	193.81	2	2	4	2	3
DITYFIQQLLR	YVIGSCIKHIPIAGRDITYFIQQLLRDREV	IAGRDITYFIQQLLRDREVGIP________	R	D	I	L	R	D	0	1	0	1	0	2	0	0	0	2	2	0	0	1	0	0	1	0	1	0	0	0	11	0	1408.77	A0A087WRA1;Q99JY9	A0A087WRA1	199	209	Actr3	Actin-related protein 3	no	no	2	0.0029813	84.476		1
DIVLTQSPASLAVSLGQR	______________________________	LTQSPASLAVSLGQRATISCRASESVDSYG	-	D	I	Q	R	A	2	1	0	1	0	2	0	1	0	1	3	0	0	0	1	3	1	0	0	2	0	0	18	0	1854.02	P01654;P01656;P01655;P03977;P01666;P01665;P01668;P01669;P01667;P01664;A0A075B5N9;P01660;P01659	P01660	1	18	Igkv3-7	Ig kappa chain V-III region PC 2880/PC 1229;Ig kappa chain V-III region MOPC 70;Ig kappa chain V-III region PC 7132;Ig kappa chain V-III region 50S10.1;Ig kappa chain V-III region PC 7183;Ig kappa chain V-III region PC 7043;Ig kappa chain V-III region PC 7210;Ig kappa chain V-III region PC 7769;Ig kappa chain V-III region PC 6308;Ig kappa chain V-III region CBPC 101;Ig kappa chain V-III region PC…	no	no	2;3	6.2681E-173	241.51	3	2	2	4	4
DIVMTQSPATLSVTPGDR	______________________________	MTQSPATLSVTPGDRVSLSCRASQSISDYL	-	D	I	D	R	V	1	1	0	2	0	1	0	1	0	1	1	0	1	0	2	2	3	0	0	2	0	0	18	0	1886.94	A0A075B5M7	A0A075B5M7	1	18	Igkv5-39		yes	yes	2;3	2.7277E-79	190.27	4	4	4	4	4
DIVMTQSPSSLSVSAGEK	______________________________	MTQSPSSLSVSAGEKVTMSCKSSQSLLNSG	-	D	I	E	K	V	1	0	0	1	0	1	1	1	0	1	1	1	1	0	1	5	1	0	0	2	0	0	18	0	1834.9	A0A075B5N3	A0A075B5N3	1	18	Igkv8-28		yes	yes	2;3	0.0005531	91.858	2		1
DIVMTQSPSSLTVTAGEK	______________________________	MTQSPSSLTVTAGEKVTMSCKSSQSLLNSG	-	D	I	E	K	V	1	0	0	1	0	1	1	1	0	1	1	1	1	0	1	3	3	0	0	2	0	0	18	0	1862.93	A0A140T8M4	A0A140T8M4	1	18			yes	yes	2	0.0014383	69.345	1	1		1	1
DIVMTQSPTFLAVTASK	______________________________	VMTQSPTFLAVTASKKVTISCTASESLYSS	-	D	I	S	K	K	2	0	0	1	0	1	0	0	0	1	1	1	1	1	1	2	3	0	0	2	0	0	17	0	1807.94	P01632	P01632	1	17	Igkv7-33	Ig kappa chain V-I region S107A	yes	yes	2;3	4.6223999999999996E-89	179.02	4	2	3	2	2
DIVMTQSQK	______________________________	______________________________	-	D	I	Q	K	F	0	0	0	1	0	2	0	0	0	1	0	1	1	0	0	1	1	0	0	1	0	0	9	0	1048.52	A0A075B5N7	A0A075B5N7	1	9	Igkv6-13		yes	yes	1;2	4.1355E-34	179.73	2	2	2	2	3
DIVWEPPVEPDNTK	HFSNNVKGELGQFYRDIVWEPPVEPDNTKR	RDIVWEPPVEPDNTKRTVKVQGVDYLATRE	R	D	I	T	K	R	0	0	1	2	0	0	2	0	0	1	0	1	0	0	3	0	1	1	0	2	0	0	14	0	1637.79	A6X935;E9Q5L2;E9PVD2;A0A2K6EDJ7	E9PVD2	892	905	Itih4	Inter alpha-trypsin inhibitor, heavy chain 4	no	no	2;3	4.5296E-29	149.96	2	2	3	2	2
DIVWEPPVEPDNTKR	HFSNNVKGELGQFYRDIVWEPPVEPDNTKR	DIVWEPPVEPDNTKRTVKVQGVDYLATREL	R	D	I	K	R	T	0	1	1	2	0	0	2	0	0	1	0	1	0	0	3	0	1	1	0	2	0	0	15	1	1793.89	A6X935;E9Q5L2;E9PVD2;A0A2K6EDJ7	E9PVD2	892	906	Itih4	Inter alpha-trypsin inhibitor, heavy chain 4	no	no	2;3	0.00048234	91.855	3	4	3	2	3
DKATLTADK	INPSSGYTKYNQKFKDKATLTADKSSSTAY	YNQKFKDKATLTADKSSSTAYMQLSSLTYE	K	D	K	D	K	S	2	0	0	2	0	0	0	0	0	0	1	2	0	0	0	0	2	0	0	0	0	0	9	1	961.508	A0A075B5T7;A0A075B5T4;A0A075B680;A0A0G2JFL3;A0A0A6YXZ4	A0A075B5T7	85	93	Ighv1-7;Ighv1-4;Ighv1-62-2		no	no	2	0.0009229	121.6					1
DKAVLFTYDQYQEK	ITVYMKDVKVSLFKKDKAVLFTYDQYQEKN	KDKAVLFTYDQYQEKNVDQASGSVLLHLEV	K	D	K	E	K	N	1	0	0	2	0	2	1	0	0	0	1	2	0	1	0	0	1	0	2	1	0	0	14	1	1746.85	Q60994	Q60994	182	195	Adipoq	Adiponectin	yes	yes	3	0.0058713	38.376	1	2
DKHADPDFTK	ETLSQMDDLEEFLSKDKHADPDFTKKLWAY	EFLSKDKHADPDFTKKLWAYLTINQLLAER	K	D	K	T	K	K	1	0	0	3	0	0	0	0	1	0	0	2	0	1	1	0	1	0	0	0	0	0	10	1	1172.55	G3X977;Q61703;CON__Q9TRI1	G3X977	576	585	Itih2	Inter-alpha-trypsin inhibitor heavy chain H2	yes	no	3	0.002662	76.332	2	2	2	2	2
DKHADPDFTKK	ETLSQMDDLEEFLSKDKHADPDFTKKLWAY	FLSKDKHADPDFTKKLWAYLTINQLLAERS	K	D	K	K	K	L	1	0	0	3	0	0	0	0	1	0	0	3	0	1	1	0	1	0	0	0	0	0	11	2	1300.64	G3X977;Q61703;CON__Q9TRI1	G3X977	576	586	Itih2	Inter-alpha-trypsin inhibitor heavy chain H2	yes	no	4	0.00026182	92.19		1	1	1
DKIGVELSGR	NDKVYSQDFEAYNTKDKIGVELSGRADLSG	AYNTKDKIGVELSGRADLSGLYSPIKLPFF	K	D	K	G	R	A	0	1	0	1	0	0	1	2	0	1	1	1	0	0	0	1	0	0	0	1	0	0	10	1	1072.59	E9Q414;E9Q1Y3	E9Q414	2004	2013	Apob	Apolipoprotein B-100;Apolipoprotein B-48	yes	no	3	0.0082293	67.385	2	1	2	1
DKLKDEDLGFL	RDFHINLFQVLPWLKDKLKDEDLGFL____	PWLKDKLKDEDLGFL_______________	K	D	K	F	L	-	0	0	0	3	0	0	1	1	0	0	3	2	0	1	0	0	0	0	0	0	0	0	11	2	1291.67	B8JJN0;F6VQX8;B8JJM5;P04186;H3BK95	B8JJN0	1266	1276	Gm20547;Cfb	Complement factor B;Complement factor B Ba fragment;Complement factor B Bb fragment	yes	no	2	0.0029756	126.31		1
DKPMYDEIFYTLSPVDGK	GAGEGIDDAEWVVARDKPMYDEIFYTLSPV	MYDEIFYTLSPVDGKITGANAKKEMVRSKL	R	D	K	G	K	I	0	0	0	3	0	0	1	1	0	1	1	2	1	1	2	1	1	0	2	1	0	0	18	1	2117	Q9QXY6	Q9QXY6	444	461	Ehd3	EH domain-containing protein 3	yes	yes	5	0.021757	18.234
DKQEYER	LTEFTHNSTMDYKCRDKQEYERSICINGKW	STMDYKCRDKQEYERSICINGKWDPEPNCT	R	D	K	E	R	S	0	1	0	1	0	1	2	0	0	0	0	1	0	0	0	0	0	0	1	0	0	0	7	1	966.441	E9Q8I0;P06909;D6RGQ0;E9Q8H9;A0A0A6YWP4	E9Q8I0	800	806	Cfh	Complement factor H	yes	no	2;3	9.4939E-16	161.68	1	2	1	2	3
DKVTAWK	FAITSDGKAFIGDIKDKVTAWKQYRKAAVL	KAFIGDIKDKVTAWKQYRKAAVLGESAGLV	K	D	K	W	K	Q	1	0	0	1	0	0	0	0	0	0	0	2	0	0	0	0	1	1	0	1	0	0	7	1	846.46	Q61702;F8WJ05;CON__Q0VCM5	Q61702	112	118	Itih1	Inter-alpha-trypsin inhibitor heavy chain H1	yes	no	2	6.1899E-07	162.5
DLAEDAPWK	______________________________	MPATEKDLAEDAPWKKIQQNTFTRWCNEHL	K	D	L	W	K	K	2	0	0	2	0	0	1	0	0	0	1	1	0	0	1	0	0	1	0	0	0	0	9	0	1043.49	B7FAV1;B7FAU9;Q8BTM8;F6XC15;Q80X90;Q8VHX6	B7FAV1	10	18	Flna;Flnb;Flnc	Filamin-A;Filamin-B;Filamin-C	yes	no	2	0.032672	63.565	1	1
DLAPTNVDFAFNLYK	WTTQAVTDEDSSSHRDLAPTNVDFAFNLYK	DLAPTNVDFAFNLYKRLVALNSDKNTLISP	R	D	L	Y	K	R	2	0	2	2	0	0	0	0	0	0	2	1	0	2	1	0	1	0	1	1	0	0	15	0	1726.86	Q06770	Q06770	33	47	Serpina6	Corticosteroid-binding globulin	yes	yes	2;3	3.5536E-05	107.18	4	3	2	3	1
DLAPTNVDFAFNLYKR	WTTQAVTDEDSSSHRDLAPTNVDFAFNLYK	LAPTNVDFAFNLYKRLVALNSDKNTLISPV	R	D	L	K	R	L	2	1	2	2	0	0	0	0	0	0	2	1	0	2	1	0	1	0	1	1	0	0	16	1	1882.96	Q06770	Q06770	33	48	Serpina6	Corticosteroid-binding globulin	yes	yes	3	0.00075188	72.175	2	1	2
DLASVAR	ESAELDVPIQSIFTRDLASVARLRVAKGDV	PIQSIFTRDLASVARLRVAKGDVNDNFQGV	R	D	L	A	R	L	2	1	0	1	0	0	0	0	0	0	1	0	0	0	0	1	0	0	0	1	0	0	7	0	730.397	P35441;Q80YQ1	P35441	190	196	Thbs1	Thrombospondin-1	yes	no	2	0.010929	105.27		1	1
DLCGQSTTQAMDQYTFELSR	AEPLQLPAIKLPTGKDLCGQSTTQAMDQYT	STTQAMDQYTFELSRRTQVPEVFLSKVLEP	K	D	L	S	R	R	1	1	0	2	1	3	1	1	0	0	2	0	1	1	0	2	3	0	1	0	0	0	20	0	2293	P21614	P21614	333	352	Gc	Vitamin D-binding protein	yes	yes	3	0.035314	21.599			1
DLDQASLAAVSQQLAPR	LECETAIAALNSCLRDLDQASLAAVSQQLA	DQASLAAVSQQLAPREGISQEALHTQMLTA	R	D	L	P	R	E	4	1	0	2	0	3	0	0	0	0	3	0	0	0	1	2	0	0	0	1	0	0	17	0	1781.93	P26039	P26039	1674	1690	Tln1	Talin-1	yes	yes	2	4.4313E-08	134.21			2	2	2
DLDQNLFQQLR	MVLLEQLFLDHNALRDLDQNLFQQLRNLQE	NALRDLDQNLFQQLRNLQELGLNQNQLSFL	R	D	L	L	R	N	0	1	1	2	0	3	0	0	0	0	3	0	0	1	0	0	0	0	0	0	0	0	11	0	1388.7	Q9QZU3;O08742	Q9QZU3	136	146	Gp5	Platelet glycoprotein V	yes	no	2	0.00022511	121.96		2	2	2	2
DLDVVNIPLAR	LSSELQWPLPEMYLRDLDVVNIPLARLTLP	MYLRDLDVVNIPLARLTLPDFHVPEITIPE	R	D	L	A	R	L	1	1	1	2	0	0	0	0	0	1	2	0	0	0	1	0	0	0	0	2	0	0	11	0	1223.69	E9Q414;E9Q1Y3	E9Q414	2689	2699	Apob	Apolipoprotein B-100;Apolipoprotein B-48	yes	no	2;3	3.0195E-12	160.59	2	2	3	2	2
DLEEPINFR	SSGLTLIWYWTRQDRDLEEPINFRLPENRI	WTRQDRDLEEPINFRLPENRISKEKDVLWF	R	D	L	F	R	L	0	1	1	1	0	0	2	0	0	1	1	0	0	1	1	0	0	0	0	0	0	0	9	0	1131.56	Q61730;E9Q6I2;G3UY13	Q61730	78	86	Il1rap	Interleukin-1 receptor accessory protein	yes	no	2	0.024556	79.469			2
DLEEVKQK	NLEKETDWVRQEMNKDLEEVKQKVQPYLDE	VRQEMNKDLEEVKQKVQPYLDEFQKKWKED	K	D	L	Q	K	V	0	0	0	1	0	1	2	0	0	0	1	2	0	0	0	0	0	0	0	1	0	0	8	1	987.524	Q00623;A0A1L1STX7;CON__P15497	Q00623	112	119	Apoa1	Apolipoprotein A-I;Proapolipoprotein A-I;Truncated apolipoprotein A-I	yes	no	2	0.015096	133.6			2
DLEFTIYDDDDVSPFLDGLEERPQR	QDLTTKNVSIGIVGKDLEFTIYDDDDVSPF	DVSPFLDGLEERPQRKAQPSQAAEEPAEKA	K	D	L	Q	R	K	0	2	0	6	0	1	3	1	0	1	3	0	0	2	2	1	1	0	1	1	0	0	25	1	2983.37	Q9R1P4;A0A1B0GS70	Q9R1P4	218	242	Psma1	Proteasome subunit alpha type-1	yes	no	3	1.5772E-05	45.784	1	1	1
DLEGLSQR	GCLETAEEAKRRLQKDLEGLSQRLEEKVAA	AKRRLQKDLEGLSQRLEEKVAAYDKLEKTK	K	D	L	Q	R	L	0	1	0	1	0	1	1	1	0	0	2	0	0	0	0	1	0	0	0	0	0	0	8	0	916.461	Q8VDD5	Q8VDD5	1393	1400	Myh9	Myosin-9	yes	yes	2	0.00093116	143		1	2	1	1
DLEIEEVLFHPK	DQKHSIKVSVGGQRRDLEIEEVLFHPKYNI	QRRDLEIEEVLFHPKYNINGKKAEGIPEFY	R	D	L	P	K	Y	0	0	0	1	0	0	3	0	1	1	2	1	0	1	1	0	0	0	0	1	0	0	12	0	1467.76	B8JJN0;F6VQX8;B8JJM5;P04186;F6XQ00;B8JJM6;H3BK95;F6W2T4;B8JJM3	B8JJN0	1059	1070	Gm20547;Cfb	Complement factor B;Complement factor B Ba fragment;Complement factor B Bb fragment	yes	no	2;3	1.5533E-05	127.4	1	1	2	3	2
DLELLASGVDR	ILDISMMTGFAPDTKDLELLASGVDRYISK	PDTKDLELLASGVDRYISKYEMNKAFSNKN	K	D	L	D	R	Y	1	1	0	2	0	0	1	1	0	0	3	0	0	0	0	1	0	0	0	1	0	0	11	0	1186.62	P01027;H3BKW9	P01027	1417	1427	C3	Complement C3;Complement C3 beta chain;C3-beta-c;Complement C3 alpha chain;C3a anaphylatoxin;Acylation stimulating protein;Complement C3b alpha chain;Complement C3c alpha chain fragment 1;Complement C3dg fragment;Complement C3g fragment;Complement C3d fragment;Complement C3f fragment;Complement C3c alpha chain fragment 2	yes	no	2	2.3985000000000002E-45	179.8	6	2	4	3	4
DLEPGSTVQLR	ETLQAPVLTAEPSSRDLEPGSTVQLRCTAP	PSSRDLEPGSTVQLRCTAPVSGLRFGLQRQ	R	D	L	L	R	C	0	1	0	1	0	1	1	1	0	0	2	0	0	0	1	1	1	0	0	1	0	0	11	0	1213.63	Q19LI2	Q19LI2	332	342	A1bg	Alpha-1B-glycoprotein	yes	yes	2	1.9924E-09	133.57	2	2
DLESASPVPVR	EVVVSRMKTVQSLSRDLESASPVPVRFVAV	SLSRDLESASPVPVRFVAVSATIPNAEDIA	R	D	L	V	R	F	1	1	0	1	0	0	1	0	0	0	1	0	0	0	2	2	0	0	0	2	0	0	11	0	1168.61	D3Z4R1	D3Z4R1	440	450	Hfm1	Probable ATP-dependent DNA helicase HFM1	yes	yes	2	0.0057222	72.485	2	1	1	1
DLEVIASTPTSLLISWEPPAVSVR	PPLIGQQATVSDIPRDLEVIASTPTSLLIS	TSLLISWEPPAVSVRYYRITYGETGGNSPV	R	D	L	V	R	Y	2	1	0	1	0	0	2	0	0	2	3	0	0	0	3	4	2	1	0	3	0	0	24	0	2579.38	A0A087WSN6;A0A087WR50;B9EHT6;P11276;Q3UHL6;B7ZNJ1;A0A087WS56	A0A087WSN6	1452	1475	Fn1	Fibronectin;Anastellin	yes	no	2;3;4	4.2638999999999996E-44	125.73	8	5	8	13	4
DLFDPIIQDR	VGCVAGDEESYTVFKDLFDPIIQDRHGGYK	YTVFKDLFDPIIQDRHGGYKPTDKHKTDLN	K	D	L	D	R	H	0	1	0	3	0	1	0	0	0	2	1	0	0	1	1	0	0	0	0	0	0	0	10	0	1230.62	P07310;A0A0J9YKD4	P07310	87	96	Ckm	Creatine kinase M-type	yes	no	2	0.0062797	85.731	2	1	2	2	2
DLFSDGHSEFLK	KFISDKDASVVGFFRDLFSDGHSEFLKAAS	FFRDLFSDGHSEFLKAASNLRDNYRFAHTN	R	D	L	L	K	A	0	0	0	2	0	0	1	1	1	0	2	1	0	2	0	2	0	0	0	0	0	0	12	0	1393.65	P27773	P27773	162	173	Pdia3	Protein disulfide-isomerase A3	yes	yes	3	0.0087268	50.95					2
DLGATWVVLGHSER	______________________________	KDLGATWVVLGHSERRHVFGESDELIGQKV	K	D	L	E	R	R	1	1	0	1	0	0	1	2	1	0	2	0	0	0	0	1	1	1	0	2	0	0	14	0	1538.78	H7BXC3;P17751	H7BXC3	4	17	Tpi1	Triosephosphate isomerase	yes	no	3	0.024463	23.419				1
DLGLSESGEDVNAAILDESGKK	TFAIADEEDYATEVKDLGLSESGEDVNAAI	GEDVNAAILDESGKKFAMEPEEFDSDTLRE	K	D	L	K	K	F	2	0	1	3	0	0	3	3	0	1	3	2	0	0	0	3	0	0	0	1	0	0	22	1	2246.09	A0A0R4J0Z1;P08003	A0A0R4J0Z1	460	481	Pdia4	Protein disulfide-isomerase A4	yes	no	3	0.0063364	28.202					1
DLGLSQGSFAFIHK	PALFKKVKETFSSNRDLGLSQGSFAFIHKD	RDLGLSQGSFAFIHKDFDIKETYFNLSKKY	R	D	L	H	K	D	1	0	0	1	0	1	0	2	1	1	2	1	0	2	0	2	0	0	0	0	0	0	14	0	1518.78	Q8R121	Q8R121	161	174	Serpina10	Protein Z-dependent protease inhibitor	yes	yes	2;3	0.00021926	120.06	3	3	3	3	3
DLHFLEELQLGHNR	LAHNAITSLRPRTFKDLHFLEELQLGHNRI	KDLHFLEELQLGHNRIRQLGEKTFEGLGQL	K	D	L	N	R	I	0	1	1	1	0	1	2	1	2	0	4	0	0	1	0	0	0	0	0	0	0	0	14	0	1719.87	A0A0R4J0S2;P70389	A0A0R4J0S2	312	325	Igfals	Insulin-like growth factor-binding protein complex acid labile subunit	yes	no	3;4	1.127E-06	118.76	4	3	4	2
DLHTLILVNNK	NKITEIKEGAFKNLKDLHTLILVNNKISKI	KNLKDLHTLILVNNKISKISPEAFKPLVKL	K	D	L	N	K	I	0	0	2	1	0	0	0	0	1	1	3	1	0	0	0	0	1	0	0	1	0	0	11	0	1278.73	P28654	P28654	101	111	Dcn	Decorin	yes	yes	3	0.0044653	58.37			1		1
DLHTSIQR	RCVQTLSHKLTRKAKDLHTSIQRNLDQLRD	KLTRKAKDLHTSIQRNLDQLRDELSAFIRV	K	D	L	Q	R	N	0	1	0	1	0	1	0	0	1	1	1	0	0	0	0	1	1	0	0	0	0	0	8	0	968.504	Q8C7G5	Q8C7G5	236	243	Apoa5	Apolipoprotein A-V	yes	yes	3	0.0029054	89.55			1		2
DLHVPDLHIPEFQLPHLSHTIEIPAFGK	EITIPEFTIPNVNLKDLHVPDLHIPEFQLP	LPHLSHTIEIPAFGKLHSILKIQSPLFILD	K	D	L	G	K	L	1	0	0	2	0	1	2	1	4	3	4	1	0	2	4	1	1	0	0	1	0	0	28	0	3199.68	E9Q414;E9Q1Y3	E9Q414	2724	2751	Apob	Apolipoprotein B-100;Apolipoprotein B-48	yes	no	5;6	0.00076154	29.54	2	3
DLHVPIPAVAEMNPNVNVFVPPR	DEYLVCKIHYGGKNKDLHVPIPAVAEMNPN	VAEMNPNVNVFVPPRDGFSGPAPRKSKLIC	K	D	L	P	R	D	2	1	3	1	0	0	1	0	1	1	1	0	1	1	5	0	0	0	0	5	0	0	23	0	2524.33	A0A075B6A0;A0A075B5P6;P01872	A0A075B6A0	99	121	Ighm	Ig mu chain C region	yes	no	2;3;4;5	1.2698E-169	160.13	8	8	8	5	14
DLHVPIPAVAEMNPNVNVFVPPRDGFSGPAPR	DEYLVCKIHYGGKNKDLHVPIPAVAEMNPN	VFVPPRDGFSGPAPRKSKLICEATNFTPKP	K	D	L	P	R	K	3	2	3	2	0	0	1	2	1	1	1	0	1	2	7	1	0	0	0	5	0	0	32	1	3408.74	A0A075B6A0;A0A075B5P6;P01872	A0A075B6A0	99	130	Ighm	Ig mu chain C region	yes	no	4	1.1318E-26	83.26	2	2	2	2
DLISHDELFSDIYK	______________________________	RDLISHDELFSDIYKIREIADGLCLEVEGK	R	D	L	Y	K	I	0	0	0	3	0	0	1	0	1	2	2	1	0	1	0	2	0	0	1	0	0	0	14	0	1693.82	P63028	P63028	6	19	Tpt1	Translationally-controlled tumor protein	yes	yes	3	0.00034204	79.633	2	2	1	2	1
DLIVTEVTEETVNLAWDNEMR	EGYTGIDCSEVSPPKDLIVTEVTEETVNLA	VTEETVNLAWDNEMRVTEYLIMYTPTHADG	K	D	L	M	R	V	1	1	2	2	0	0	4	0	0	1	2	0	1	0	0	0	3	1	0	3	0	0	21	0	2476.18	Q80YX1;Q80YX0	Q80YX1	628	648	Tnc	Tenascin	yes	no	3	1.2302E-07	65.784	1
DLLFKDSAFGLLR	GKSKDFQLFSSPLGKDLLFKDSAFGLLRVP	GKDLLFKDSAFGLLRVPPRMDYRLYLGHNY	K	D	L	L	R	V	1	1	0	2	0	0	0	1	0	0	4	1	0	2	0	1	0	0	0	0	0	0	13	1	1493.82	Q921I1;E9Q2Q7	Q921I1	311	323	Tf;Trf	Serotransferrin	yes	no	3	6.8961E-05	89.43	2	2	2
DLLFRDDTK	SDCTGNFCLFKSTTKDLLFRDDTKCFVKLP	FKSTTKDLLFRDDTKCFVKLPEGTTPEKYL	K	D	L	T	K	C	0	1	0	3	0	0	0	0	0	0	2	1	0	1	0	0	1	0	0	0	0	0	9	1	1121.57	Q921I1;F7CJN9;CON__Q29443;CON__Q0IIK2	Q921I1	646	654	Tf;Trf	Serotransferrin	yes	no	2	0.011813	111.06			2
DLLLDPAWEK	QQTNDYMQPEEDWDRDLLLDPAWEKQQRKT	EDWDRDLLLDPAWEKQQRKTFTAWCNSHLR	R	D	L	E	K	Q	1	0	0	2	0	0	1	0	0	0	3	1	0	0	1	0	0	1	0	0	0	0	10	0	1198.62	A1BN54;Q7TPR4;Q9JI91;O88990	A1BN54	22	31	Actn1;Actn2;Actn3	Alpha-actinin-1;Alpha-actinin-2;Alpha-actinin-3	no	no	2	0.024618	56.729			1
DLLNNHILK	AETLNRILGDPEALRDLLNNHILKSAMCAE	DPEALRDLLNNHILKSAMCAEAIVAGMSME	R	D	L	L	K	S	0	0	2	1	0	0	0	0	1	1	3	1	0	0	0	0	0	0	0	0	0	0	9	0	1078.61	P82198;Q3UXJ2	P82198	305	313	Tgfbi	Transforming growth factor-beta-induced protein ig-h3	yes	no	3	0.013928	60.59	1			1	2
DLLTAYYDVDYEK	CPHMTEDNKDLIQGKDLLTAYYDVDYEKNA	GKDLLTAYYDVDYEKNAKGSNYWRNRVMMV	K	D	L	E	K	N	1	0	0	3	0	0	1	0	0	0	2	1	0	0	0	0	1	0	3	1	0	0	13	0	1606.74	P27773	P27773	259	271	Pdia3	Protein disulfide-isomerase A3	yes	yes	2	0.0096712	52.79					1
DLLTQPGDWTLFAPTNDAFK	RFSIFLSLLEAADLKDLLTQPGDWTLFAPT	PGDWTLFAPTNDAFKGMTSEERELLIGDKN	K	D	L	F	K	G	2	0	1	3	0	1	0	1	0	0	3	1	0	2	2	0	3	1	0	0	0	0	20	0	2249.1	Q62009	Q62009	525	544	Postn	Periostin	yes	yes	3	0.0054656	32.181					1
DLMSSLQSAR	DREDGNDSHVRQFNKDLMSSLQSARDLQDM	RQFNKDLMSSLQSARDLQDMRIKNKERRHL	K	D	L	A	R	D	1	1	0	1	0	1	0	0	0	0	2	0	1	0	0	3	0	0	0	0	0	0	10	0	1106.54	P97929	P97929	2400	2409	Brca2	Breast cancer type 2 susceptibility protein homolog	yes	yes	2	0.028949	40.045
DLMVGDEASELR	PIIRSTTKVGNIEIKDLMVGDEASELRSML	EIKDLMVGDEASELRSMLEVNYPMENGIVR	K	D	L	L	R	S	1	1	0	2	0	0	2	1	0	0	2	0	1	0	0	1	0	0	0	1	0	0	12	0	1333.62	P61161	P61161	54	65	Actr2	Actin-related protein 2	yes	yes	2	0.0025749	73.067	2	1	2	2	2
DLNMDVSFHLPSR	FQALAQYQTDVPDHKDLNMDVSFHLPSRSS	HKDLNMDVSFHLPSRSSATTFRLLWENGNL	K	D	L	S	R	S	0	1	1	2	0	0	0	0	1	0	2	0	1	1	1	2	0	0	0	1	0	0	13	0	1529.73	P01027	P01027	1291	1303	C3	Complement C3;Complement C3 beta chain;C3-beta-c;Complement C3 alpha chain;C3a anaphylatoxin;Acylation stimulating protein;Complement C3b alpha chain;Complement C3c alpha chain fragment 1;Complement C3dg fragment;Complement C3g fragment;Complement C3d fragment;Complement C3f fragment;Complement C3c alpha chain fragment 2	yes	yes	2;3	8.6351E-140	168.82	4	4	5	6	6
DLPAPIER	DWMSGKEFKCKVNNKDLPAPIERTISKPKG	KCKVNNKDLPAPIERTISKPKGSVRAPQVY	K	D	L	E	R	T	1	1	0	1	0	0	1	0	0	1	1	0	0	0	2	0	0	0	0	0	0	0	8	0	909.492	P01863;P01865	P01863	210	217	Ighg;Igh-1a	Ig gamma-2A chain C region, A allele;Ig gamma-2A chain C region, membrane-bound form	yes	no	2	0.0094986	111.82	2	2	2	2	2
DLPSPIER	DWMSGKEFKCKVNNKDLPSPIERTISKIKG	KCKVNNKDLPSPIERTISKIKGLVRAPQVY	K	D	L	E	R	T	0	1	0	1	0	0	1	0	0	1	1	0	0	0	2	1	0	0	0	0	0	0	8	0	925.487	A0A075B5P3;A0A0A6YVP0;P01867	A0A075B5P3	216	223	Ighg2b;Igh-3	Ig gamma-2B chain C region	no	no	2	0.0025875	114.78	2	2	2	2	2
DLPSPQK	DWNNRKEFVCTVTHRDLPSPQKKFISKPNE	FVCTVTHRDLPSPQKKFISKPNEVHKHPPA	R	D	L	Q	K	K	0	0	0	1	0	1	0	0	0	0	1	1	0	0	2	1	0	0	0	0	0	0	7	0	783.413	A0A075B6A0;A0A075B5P6;P01872	A0A075B6A0	311	317	Ighm	Ig mu chain C region	yes	no	1;2	1.6071E-05	138.24		1			1
DLPSPQKK	DWNNRKEFVCTVTHRDLPSPQKKFISKPNE	VCTVTHRDLPSPQKKFISKPNEVHKHPPAV	R	D	L	K	K	F	0	0	0	1	0	1	0	0	0	0	1	2	0	0	2	1	0	0	0	0	0	0	8	1	911.508	A0A075B6A0;A0A075B5P6;P01872	A0A075B6A0	311	318	Ighm	Ig mu chain C region	yes	no	2;3	0.0071728	104.45		2	2	3	1
DLQFSDIGETSAK	QGTARTLSPVLESPRDLQFSDIGETSAKVK	PRDLQFSDIGETSAKVKWVPPTSRVDSFKI	R	D	L	A	K	V	1	0	0	2	0	1	1	1	0	1	1	1	0	1	0	2	1	0	0	0	0	0	13	0	1409.67	E9Q2T3;O35452;A0A571BG59;A0A5F8MPH8	E9Q2T3	2643	2655	Tnxb		yes	no	2	0.012738	62.303	1		1
DLQILAEFHEK	DQDQINIGNAMFIEKDLQILAEFHEKTRAL	FIEKDLQILAEFHEKTRALYQTEAFTADFQ	K	D	L	E	K	T	1	0	0	1	0	1	2	0	1	1	2	1	0	1	0	0	0	0	0	0	0	0	11	0	1341.69	A0A0R4J0I1;P07759;Q03734	P07759	145	155	Serpina3k;Serpina3m	Serine protease inhibitor A3K;Serine protease inhibitor A3M	no	no	2;3	3.6789E-12	149.33	2	3	3	4	3
DLSDVSALK	GQMKDASRELQTLRRDLSDVSALKSNVQML	LQTLRRDLSDVSALKSNVQMLQSNLQRAKT	R	D	L	L	K	S	1	0	0	2	0	0	0	0	0	0	2	1	0	0	0	2	0	0	0	1	0	0	9	0	946.497	A0A0R4IZZ5;P70194	A0A0R4IZZ5	339	347	Clec4f	C-type lectin domain family 4 member F	yes	no	2	0.01342	83.265	1	1	1
DLSPQDQFNLIEFSGEANQWK	KKIQQTREALVKILKDLSPQDQFNLIEFSG	QFNLIEFSGEANQWKQSLVQATEENLNKAV	K	D	L	W	K	Q	1	0	2	2	0	3	2	1	0	1	2	1	0	2	1	2	0	1	0	0	0	0	21	0	2465.15	A6X935;E9Q5L2;E9PVD2;A0A2K6EDJ7	E9PVD2	303	323	Itih4	Inter alpha-trypsin inhibitor, heavy chain 4	no	no	2;3	1.7144E-91	162.76	2	2	2	3	2
DLSSQTQYTVSVSAVYDEGTSPPATAYDTTR	KEVEVDRSRASTILKDLSSQTQYTVSVSAV	DEGTSPPATAYDTTRRVPAPTNLQFTEVTP	K	D	L	T	R	R	3	1	0	3	0	2	1	1	0	0	1	0	0	0	2	5	6	0	3	3	0	0	31	0	3309.52	E9PX70;Q60847	E9PX70	1623	1653	Col12a1	Collagen alpha-1(XII) chain	yes	no	3	2.596E-06	38.844
DLSSSDLSTASK	VLLAYLTSESSRPTRDLSSSDLSTASKIVK	PTRDLSSSDLSTASKIVKWISKQQNSHGGF	R	D	L	S	K	I	1	0	0	2	0	0	0	0	0	0	2	1	0	0	0	5	1	0	0	0	0	0	12	0	1209.57	Q61838	Q61838	1240	1251	A2m	Alpha-2-macroglobulin;Alpha-2-macroglobulin 165 kDa subunit;Alpha-2-macroglobulin 35 kDa subunit	yes	yes	2	2.0627E-17	164.97	3	3	2	2	2
DLSVSQVVHK	IFSKQADLSGITGTKDLSVSQVVHKAVLDV	ITGTKDLSVSQVVHKAVLDVAETGTEAAAA	K	D	L	H	K	A	0	0	0	1	0	1	0	0	1	0	1	1	0	0	0	2	0	0	0	3	0	0	10	0	1110.6	Q03734	Q03734	349	358	Serpina3m	Serine protease inhibitor A3M	yes	yes	2	0.0067996	80.165		1		2	2
DLTADTEYQISVFAMK	HALSVGPQTTTLNVRDLTADTEYQISVFAM	LTADTEYQISVFAMKGLTSSEPTSVMEKTQ	R	D	L	M	K	G	2	0	0	2	0	1	1	0	0	1	1	1	1	1	0	1	2	0	1	1	0	0	16	0	1830.87	E9PX70;Q60847	E9PX70	393	408	Col12a1	Collagen alpha-1(XII) chain	yes	no	2	1.2624999999999999E-43	157.68					2
DLTDYLMK	YALPHAILRLDLAGRDLTDYLMKILTERGY	RLDLAGRDLTDYLMKILTERGYSFTTTAER	R	D	L	M	K	I	0	0	0	2	0	0	0	0	0	0	2	1	1	0	0	0	1	0	1	0	0	0	8	0	997.479	P63260;P60710;E9Q5F4;G3UZ07;E9Q1F2;P68134;P68033;P63268;P62737;A0A494B9T3;D3YZY0;D3Z2K3;A0A0U1RQ96;Q8BFZ3	P63260	184	191	Actg1;Actb;Acta1;Actc1;Actg2;Acta2;Actbl2	Actin, cytoplasmic 2;Actin, cytoplasmic 2, N-terminally processed;Actin, cytoplasmic 1;Actin, cytoplasmic 1, N-terminally processed;Actin, alpha skeletal muscle;Actin, alpha cardiac muscle 1;Actin, gamma-enteric smooth muscle;Actin, aortic smooth muscle;Beta-actin-like protein 2	no	no	2	0.027359	79.116					1
DLTFYYLIK	RIHYLLNEDIMKNEKDLTFYYLIKARGSIF	IMKNEKDLTFYYLIKARGSIFNLGSHVLSL	K	D	L	I	K	A	0	0	0	1	0	0	0	0	0	1	2	1	0	1	0	0	1	0	2	0	0	0	9	0	1174.63	Q61838	Q61838	491	499	A2m	Alpha-2-macroglobulin;Alpha-2-macroglobulin 165 kDa subunit;Alpha-2-macroglobulin 35 kDa subunit	yes	yes	1;2	0.0017665	119.89	3	2	2	2	2
DLYANTVLSGGTTMYPGIADR	TTFNSIMKCDVDIRKDLYANTVLSGGTTMY	VLSGGTTMYPGIADRMQKEITALAPSTMKI	K	D	L	D	R	M	2	1	1	2	0	0	0	3	0	1	2	0	1	0	1	1	3	0	2	1	0	0	21	0	2214.06	P63260;P60710;E9Q1F2;B1ATY1;F8WGM8	P63260	292	312	Actg1;Actb	Actin, cytoplasmic 2;Actin, cytoplasmic 2, N-terminally processed;Actin, cytoplasmic 1;Actin, cytoplasmic 1, N-terminally processed	yes	no	2;3	6.6079E-135	184.76	2	3	2	3	2
DMDVVSGR	EHTSCRDQPFTILYRDMDVVSGRSVPADIF	PFTILYRDMDVVSGRSVPADIFQMQATTRY	R	D	M	G	R	S	0	1	0	2	0	0	0	1	0	0	0	0	1	0	0	1	0	0	0	2	0	0	8	0	877.396	A0A1Y7VJW9;Q9WVH9	A0A1Y7VJW9	365	372	Fbln5	Fibulin-5	yes	no	2	0.022826	77.282			1		1
DMEDLENVFYQMIDETK	LASKKDNEHHVFKVKDMEDLENVFYQMIDE	EDLENVFYQMIDETKSLSLCGMVWEHKKGN	K	D	M	T	K	S	0	0	1	3	0	1	3	0	0	1	1	1	2	1	0	0	1	0	1	1	0	0	17	0	2118.91	B8JJN0;F6VQX8;B8JJM5;P04186;F6XQ00;B8JJM6	B8JJN0	969	985	Gm20547;Cfb	Complement factor B;Complement factor B Ba fragment;Complement factor B Bb fragment	yes	no	2;3	1.7921E-16	124.43	3	2	2	5	4
DMFQETMEAMR	FLSNGHVTIPGQQDKDMFQETMEAMRIMGI	QQDKDMFQETMEAMRIMGIPEDEQMGLLRV	K	D	M	M	R	I	1	1	0	1	0	1	2	0	0	0	0	0	3	1	0	0	1	0	0	0	0	0	11	0	1387.56	Q8VDD5	Q8VDD5	317	327	Myh9	Myosin-9	yes	yes	2	0.0045922	76.465					2
DMNYANPIIK	VETTAYALLASLKLKDMNYANPIIKWLSEE	SLKLKDMNYANPIIKWLSEEQRYGGGFYST	K	D	M	I	K	W	1	0	2	1	0	0	0	0	0	2	0	1	1	0	1	0	0	0	1	0	0	0	10	0	1177.58	P06684	P06684	1267	1276	C5	Complement C5;Complement C5 beta chain;Complement C5 alpha chain;C5a anaphylatoxin;Complement C5 alpha chain	yes	yes	1;2	0.0003063	112.84	2	2	2	2	2
DNCQYVYNVDQR	ACAVDIDGDGILNERDNCQYVYNVDQRDTD	NERDNCQYVYNVDQRDTDMDGVGDQCDNCP	R	D	N	Q	R	D	0	1	2	2	1	2	0	0	0	0	0	0	0	0	0	0	0	0	2	2	0	0	12	0	1515.64	P35441;Q80YQ1	P35441	811	822	Thbs1	Thrombospondin-1	yes	no	2	0.028714	57.348			1
DNDGWVTTDPR	TMTIHNGMFFSTYDRDNDGWVTTDPRKQCS	TYDRDNDGWVTTDPRKQCSKEDGGGWWYNR	R	D	N	P	R	K	0	1	1	3	0	0	0	1	0	0	0	0	0	0	1	0	2	1	0	1	0	0	11	0	1274.55	Q8K0E8	Q8K0E8	401	411	Fgb	Fibrinogen beta chain;Fibrinopeptide B;Fibrinogen beta chain	yes	yes	2	7.3384E-07	121.5	1	1	1	2	1
DNDLISLPK	PDIGKLTKLQILSLRDNDLISLPKEIGELT	QILSLRDNDLISLPKEIGELTQLKELHIQG	R	D	N	P	K	E	0	0	1	2	0	0	0	0	0	1	2	1	0	0	1	1	0	0	0	0	0	0	9	0	1013.54	A2AUR7;Q9D031;Q01730	A2AUR7	149	157	Rsu1	Ras suppressor protein 1	yes	no	2	0.0070041	93.267	1	2	1	1	2
DNEDFQESNR	DNIKTFCSEPEKVDKDNEDFQESNRMYSIN	EKVDKDNEDFQESNRMYSINGYTFGSLPGL	K	D	N	N	R	M	0	1	2	2	0	1	2	0	0	0	0	0	0	1	0	1	0	0	0	0	0	0	10	0	1252.5	G3X9T8;G3X8Q5	G3X9T8	248	257	Cp		no	no	2	4.546699999999999E-50	211.45	2		2	2	1
DNEEFLESNK	DNIKTYSEHPEKVNKDNEEFLESNKMHAIN	EKVNKDNEEFLESNKMHAINGKMFGNLQGL	K	D	N	N	K	M	0	0	2	1	0	0	3	0	0	0	1	1	0	1	0	1	0	0	0	0	0	0	10	0	1223.53	G3X9T8;G3X8Q5	G3X9T8	942	951	Cp		no	no	2	9.9557E-51	186.16	2	2	2	2	2
DNEHHVFK	PLVDSVNINALASKKDNEHHVFKVKDMEDL	NALASKKDNEHHVFKVKDMEDLENVFYQMI	K	D	N	F	K	V	0	0	1	1	0	0	1	0	2	0	0	1	0	1	0	0	0	0	0	1	0	0	8	0	1024.47	B8JJN0;F6VQX8;B8JJM5;P04186;F6XQ00;B8JJM6;H3BK95	B8JJN0	959	966	Gm20547;Cfb	Complement factor B;Complement factor B Ba fragment;Complement factor B Bb fragment	yes	no	2;3	0.023235	80.438				1	1
DNELLIYK	LSRSQSLFSYSVKGRDNELLIYKEKVGEYS	SYSVKGRDNELLIYKEKVGEYSLYIGQSKV	R	D	N	Y	K	E	0	0	1	1	0	0	1	0	0	1	2	1	0	0	0	0	0	0	1	0	0	0	8	0	1006.53	P12246	P12246	78	85	Apcs	Serum amyloid P-component	yes	yes	2	0.00085579	147.34	1	2	2	2	1
DNHLAPGQQTTLR	KDSCIGTLVVKGDPRDNHLAPGQQTTLRIE	PRDNHLAPGQQTTLRIEGNQGARVGLVAVD	R	D	N	L	R	I	1	1	1	1	0	2	0	1	1	0	2	0	0	0	1	0	2	0	0	0	0	0	13	0	1449.73	P01027;H3BL60	P01027	571	583	C3	Complement C3;Complement C3 beta chain;C3-beta-c;Complement C3 alpha chain;C3a anaphylatoxin;Acylation stimulating protein;Complement C3b alpha chain;Complement C3c alpha chain fragment 1;Complement C3dg fragment;Complement C3g fragment;Complement C3d fragment;Complement C3f fragment;Complement C3c alpha chain fragment 2	yes	no	2;3	2.0319E-27	143.31	7	6	5	7	6
DNIIDDVISFIR	GCIKTDNGKTVNITRDNIIDDVISFIRGGT	ITRDNIIDDVISFIRGGTREQAILLKEKIL	R	D	N	I	R	G	0	1	1	3	0	0	0	0	0	4	0	0	0	1	0	1	0	0	0	1	0	0	12	0	1418.74	P06683;A0A0R4J032;H3BKN4	P06683	421	432	C9	Complement component C9	yes	no	2;3	2.9027E-34	164.64	3	4	5	2	1
DNIQGITK	GLGKGGAKRHRKVLRDNIQGITKPAIRRLA	RHRKVLRDNIQGITKPAIRRLARRGGVKRI	R	D	N	T	K	P	0	0	1	1	0	1	0	1	0	2	0	1	0	0	0	0	1	0	0	0	0	0	8	0	887.471	P62806	P62806	25	32	Hist1h4a	Histone H4	yes	yes	2	0.022491	81.215
DNIQGITKPAIR	GLGKGGAKRHRKVLRDNIQGITKPAIRRLA	VLRDNIQGITKPAIRRLARRGGVKRISGLI	R	D	N	I	R	R	1	1	1	1	0	1	0	1	0	3	0	1	0	0	1	0	1	0	0	0	0	0	12	1	1324.75	P62806	P62806	25	36	Hist1h4a	Histone H4	yes	yes	3	0.01964	45.915					2
DNLEANYQNADQYFYAR	REAVQGTWDLWRAYRDNLEANYQNADQYFY	LEANYQNADQYFYARGNYEAQQRGSGGIWA	R	D	N	A	R	G	3	1	3	2	0	2	1	0	0	0	1	0	0	1	0	0	0	0	3	0	0	0	17	0	2093.91	P31532	P31532	41	57	Saa4	Serum amyloid A-4 protein	yes	yes	2;3	6.2036E-195	213.73	2	2	4	3	4
DNNLLGK	GVLIQVYEGERAMTKDNNLLGKFELTGIPP	EGERAMTKDNNLLGKFELTGIPPAPRGVPQ	K	D	N	G	K	F	0	0	2	1	0	0	0	1	0	0	2	1	0	0	0	0	0	0	0	0	0	0	7	0	772.408	P63017;Q504P4;P17156	P63017	452	458	Hspa8;Hspa2	Heat shock cognate 71 kDa protein;Heat shock-related 70 kDa protein 2	yes	no	2	0.026383	94.163				1
DNSISSIEEQSLAGLSELLELDLTANQLTHLPR	HTFAGLSGLRRLFLRDNSISSIEEQSLAGL	LELDLTANQLTHLPRQLFQGLGQLEYLLLS	R	D	N	P	R	Q	2	1	2	2	0	2	4	1	1	2	8	0	0	0	1	5	2	0	0	0	0	0	33	0	3605.84	A0A0R4J0S2;P70389	A0A0R4J0S2	419	451	Igfals	Insulin-like growth factor-binding protein complex acid labile subunit	yes	no	3;4	3.1381E-57	118.23	3	3	2
DNSNIILLGDSQGDLR	HDGALKNTDYFSQLKDNSNIILLGDSQGDL	NSNIILLGDSQGDLRMADGVANVEHILKIG	K	D	N	L	R	M	0	1	2	3	0	1	0	2	0	2	3	0	0	0	0	2	0	0	0	0	0	0	16	0	1728.86	Q9D020	Q9D020	263	278	Nt5c3a	Cytosolic 5-nucleotidase 3A	yes	yes	2	0.025908	38.021				1
DNSQSILYLQMNALR	TEYSASVKGRFTISRDNSQSILYLQMNALR	DNSQSILYLQMNALRAEDSATYYCARY___	R	D	N	L	R	A	1	1	2	1	0	2	0	0	0	1	3	0	1	0	0	2	0	0	1	0	0	0	15	0	1764.88	A0A075B5R2	A0A075B5R2	94	108	Ighv7-3		yes	yes	2;3	0	276.35	2	3	2	3	3
DNSQVNAVTVHTLLDK	PSPSLNLGSTEEAIRDNSQVNAVTVHTLLD	NSQVNAVTVHTLLDKLVNMLDAVRENQHNM	R	D	N	D	K	L	1	0	2	2	0	1	0	0	1	0	2	1	0	0	0	1	2	0	0	3	0	0	16	0	1752.9	Q63918	Q63918	49	64	Sdpr	Serum deprivation-response protein	yes	yes	3	0.0023283	40.856			1		2
DNSTMGYMAAK	WTANMERIMKAQALRDNSTMGYMAAKKHLE	QALRDNSTMGYMAAKKHLEINPDHSIIETL	R	D	N	A	K	K	2	0	1	1	0	0	0	1	0	0	0	1	2	0	0	1	1	0	1	0	0	0	11	0	1187.5	P07901	P07901	622	632	Hsp90aa1	Heat shock protein HSP 90-alpha	yes	yes	2	0.012747	60.019					2
DNTGQIFSVVSNGK	QMKKTRGTLLAVERKDNTGQIFSVVSNGKA	KDNTGQIFSVVSNGKAGTLDLSLSLPGKQQ	K	D	N	G	K	A	0	0	2	1	0	1	0	2	0	1	0	1	0	1	0	2	1	0	0	2	0	0	14	0	1464.72	P35441;Q80YQ1	P35441	111	124	Thbs1	Thrombospondin-1	yes	no	2;3	2.6264E-140	200.06	1	3	3	3	2
DNVVIESTKPENQEAQDGLR	LSKEPSIFREELISKDNVVIESTKPENQEA	ESTKPENQEAQDGLRSGSSQLEETTRPTTS	K	D	N	L	R	S	1	1	2	2	0	2	3	1	0	1	1	1	0	0	1	1	1	0	0	2	0	0	20	1	2241.09	Q02596;B7ZNZ9;A0A2I3BPT0	Q02596	73	92	Glycam1	Glycosylation-dependent cell adhesion molecule 1	yes	no	3	0.00027782	53.773	2	2		2
DNYDPHDLKR	SQLETYAIQFDQYIKDNYDPHDLKRTIAEI	DQYIKDNYDPHDLKRTIAEIIDRIIEKLKI	K	D	N	K	R	T	0	1	1	3	0	0	0	0	1	0	1	1	0	0	1	0	0	0	1	0	0	0	10	1	1271.59	E9Q414;E9Q1Y3	E9Q414	2186	2195	Apob	Apolipoprotein B-100;Apolipoprotein B-48	yes	no	3	0.028582	35.348	1	1	1
DNYSGGVVNMYHMK	AYDLGRRAIAYATHRDNYSGGVVNMYHMKE	RDNYSGGVVNMYHMKEDGWVKVESSDVSDL	R	D	N	M	K	E	0	0	2	1	0	0	0	2	1	0	0	1	2	0	0	1	0	0	2	2	0	0	14	0	1613.7	P28063;G3UZW8	P28063	239	252	Psmb8	Proteasome subunit beta type-8;Proteasome subunit beta type	yes	no	3	0.0060941	30.567				2
DPDQTDGPGLGYLSSHIANVER	GGETPLFKQFFKNWRDPDQTDGPGLGYLSS	PGLGYLSSHIANVERVPFDAATLHTSTAMA	R	D	P	E	R	V	1	1	1	3	0	1	1	3	1	1	2	0	0	0	2	2	1	0	1	1	0	0	22	0	2340.1	P13020;A0A0J9YUQ8	P13020	396	417	Gsn	Gelsolin	yes	no	2;3	1.1832E-109	170.18	3	6	3	6	4
DPEGLFLQDNIIAEFSVDEK	DKARFSGLWYAIAKKDPEGLFLQDNIIAEF	FLQDNIIAEFSVDEKGHMSATAKGRVRLLS	K	D	P	E	K	G	1	0	1	3	0	1	3	1	0	2	2	1	0	2	1	1	0	0	0	1	0	0	20	0	2278.1	H7BWY6;Q00724;A0A494B9P3;A0A494B9T2	H7BWY6	93	112	Rbp4	Retinol-binding protein 4	yes	no	2;3	1.1269E-11	139.66	2	2	2
DPNASPGDAGEQAIR	ASIDSKLNQAKGWLRDPNASPGDAGEQAIR	DPNASPGDAGEQAIRQILDEAGKVGELCAG	R	D	P	I	R	Q	3	1	1	2	0	1	1	2	0	1	0	0	0	0	2	1	0	0	0	0	0	0	15	0	1496.69	Q64727	Q64727	286	300	Vcl	Vinculin	yes	yes	2	0.0019946	66.262					2
DPNGLSPETR	LDGTCADSYSFVFSRDPNGLSPETRRLVRQ	FVFSRDPNGLSPETRRLVRQRQEELCLERQ	R	D	P	T	R	R	0	1	1	1	0	0	1	1	0	0	1	0	0	0	2	1	1	0	0	0	0	0	10	0	1084.51	H7BWY6;Q00724	H7BWY6	202	211	Rbp4	Retinol-binding protein 4	yes	no	2	0.0089425	76.1	1	2	2	2	1
DPNTETTEFSDFDLLDALS	SPKCPGRPWKPASWKDPNTETTEFSDFDLL	ETTEFSDFDLLDALS_______________	K	D	P	L	S	-	1	0	1	4	0	0	2	0	0	0	3	0	0	2	1	2	3	0	0	0	0	0	19	0	2128.93	A0A0R4J038;D3YTY9	A0A0R4J038	643	661	Kng1		yes	no	2	4.4501E-06	96.059				1
DPNYYRPPGLPAK	TMADQEANRHGRSGKDPNYYRPPGLPAKY_	GKDPNYYRPPGLPAKY______________	K	D	P	A	K	Y	1	1	1	1	0	0	0	1	0	0	1	1	0	0	4	0	0	0	2	0	0	0	13	1	1486.76	A0A1B0GQV5;P05367	A0A1B0GQV5	75	87	Saa2	Serum amyloid A-2 protein;Amyloid protein A	yes	no	3	0.014702	35.737				2
DPSSNDPLTETIR	LRTTLSKRPEEPPRKDPSSNDPLTETIRKY	RKDPSSNDPLTETIRKYFPETWVWDIVTVN	K	D	P	I	R	K	0	1	1	2	0	0	1	0	0	1	1	0	0	0	2	2	2	0	0	0	0	0	13	0	1443.68	P28665	P28665	722	734	Mug1	Murinoglobulin-1	yes	yes	2	1.1475E-298	240.1	1	2	2	2	1
DPSSNDPLTETIRK	LRTTLSKRPEEPPRKDPSSNDPLTETIRKY	KDPSSNDPLTETIRKYFPETWVWDIVTVNS	K	D	P	R	K	Y	0	1	1	2	0	0	1	0	0	1	1	1	0	0	2	2	2	0	0	0	0	0	14	1	1571.78	P28665	P28665	722	735	Mug1	Murinoglobulin-1	yes	yes	3	0.0016827	56.29		2	2
DPVHTVSHTVISLPTFR	RCIKSCRPNDEACVRDPVHTVSHTVISLPT	VHTVSHTVISLPTFREFTRPEEIIFLRAVT	R	D	P	F	R	E	0	1	0	1	0	0	0	0	2	1	1	0	0	1	2	2	3	0	0	3	0	0	17	0	1905.01	Q08879	Q08879	593	609	Fbln1	Fibulin-1	yes	yes	3;4	0.0009063	58.159	2	1	2
DPVQLNLLYVQAR	LRRKFFYSDQNVDSRDPVQLNLLYVQARDD	SRDPVQLNLLYVQARDDILNGSHPVSFDKA	R	D	P	A	R	D	1	1	1	1	0	2	0	0	0	0	3	0	0	0	1	0	0	0	1	2	0	0	13	0	1527.84	P26039;A2AIM2;E9PUM4;A0A1L1SQ51;Q71LX4	P26039	208	220	Tln1;Tln2	Talin-1;Talin-2	yes	no	2;3	7.4605E-05	125.97	1	2	3	2	3
DQATTSDNLFIAPVGISTAMGMISLGLR	ILNAKFAFNLYRVLKDQATTSDNLFIAPVG	VGISTAMGMISLGLRGETHEEVHSVLHFRD	K	D	Q	L	R	G	3	1	1	2	0	1	0	3	0	3	3	0	2	1	1	3	3	0	0	1	0	0	28	0	2878.46	P49182	P49182	122	149	Serpind1	Heparin cofactor 2	yes	yes	3	5.7048E-37	119.14	2	2	1
DQFQAALDK	QAKLVEGRTHISISKDQFQAALDKINIGVR	HISISKDQFQAALDKINIGVRDLEGLRLYA	K	D	Q	D	K	I	2	0	0	2	0	2	0	0	0	0	1	1	0	1	0	0	0	0	0	0	0	0	9	0	1034.5	P01029	P01029	315	323	C4b	Complement C4-B;Complement C4 beta chain;Complement C4 alpha chain;C4a anaphylatoxin;Complement C4 gamma chain	yes	yes	1;2	0.0010945	126.31	4	3	4	2	2
DQFQAALDKINIGVR	QAKLVEGRTHISISKDQFQAALDKINIGVR	DQFQAALDKINIGVRDLEGLRLYAATAVIE	K	D	Q	V	R	D	2	1	1	2	0	2	0	1	0	2	1	1	0	1	0	0	0	0	0	1	0	0	15	1	1686.91	P01029	P01029	315	329	C4b	Complement C4-B;Complement C4 beta chain;Complement C4 alpha chain;C4a anaphylatoxin;Complement C4 gamma chain	yes	yes	2;3	4.7318000000000004E-33	160.15	2	2	4	2	1
DQGELER	IQYLAHVASSHKSKKDQGELERQLLQANPI	ASSHKSKKDQGELERQLLQANPILEAFGNA	K	D	Q	E	R	Q	0	1	0	1	0	1	2	1	0	0	1	0	0	0	0	0	0	0	0	0	0	0	7	0	845.388	Q8VDD5	Q8VDD5	203	209	Myh9	Myosin-9	yes	yes	2	0.0075763	125.25		1
DQGTYEDYVEGLR	FEHFLPMLQTVAKNKDQGTYEDYVEGLRVF	NKDQGTYEDYVEGLRVFDKEGNGTVMGAEI	K	D	Q	L	R	V	0	1	0	2	0	1	2	2	0	0	1	0	0	0	0	0	1	0	2	1	0	0	13	0	1543.68	A0A1W2P6F6;A0A1W2P7Q9;Q60605;A0A1W2P6G5	A0A1W2P6F6	82	94	Myl6	Myosin light polypeptide 6	yes	no	2	0.043153	48.004					1
DQLIVNLLK	______________________________	______________________________	K	D	Q	L	K	E	0	0	1	1	0	1	0	0	0	1	3	1	0	0	0	0	0	0	0	1	0	0	9	0	1054.64	A0A1B0GSR9;A0A1B0GSX0;P06151;A0A1B0GRC1;A0A1B0GRS2;A0A1B0GRW9;A0A1B0GSL7;A0A1B0GT41;A0A1B0GQX5;A0A1B0GS79;D3YZQ9	A0A1B0GSR9	6	14	Ldha	L-lactate dehydrogenase A chain;L-lactate dehydrogenase	yes	no	2	0.026821	66.429		1	2
DQPGVYTK	QLVGITSWGEGCARKDQPGVYTKVSEYMDW	GEGCARKDQPGVYTKVSEYMDWILEKTQSS	K	D	Q	T	K	V	0	0	0	1	0	1	0	1	0	0	0	1	0	0	1	0	1	0	1	1	0	0	8	0	906.445	P26262	P26262	606	613	Klkb1	Plasma kallikrein;Plasma kallikrein heavy chain;Plasma kallikrein light chain	yes	yes	2;3	0.01849	67.169		1
[truncated: 3,666 more rows]
[truncated: 26 more columns]

## Sheet: Carboxylate_NPs_peptides
Sequence	N-term cleavage window	C-term cleavage window	Amino acid before	First amino acid	Second amino acid	Second last amino acid	Last amino acid	Amino acid after	A Count	R Count	N Count	D Count	C Count	Q Count	E Count	G Count	H Count	I Count	L Count	K Count	M Count	F Count	P Count	S Count	T Count	W Count	Y Count	V Count	U Count	O Count	Length	Missed cleavages	Mass	Proteins	Leading razor protein	Start position	End position	Gene names	Protein names	Unique (Groups)	Unique (Proteins)	Charges	PEP	Score	Experiment BN010	Experiment BN012	Experiment BN110	Experiment KBN002	Experiment KBN010
[truncated: 4,539 more rows]
[truncated: 26 more columns]
